# Supplementary material for: Exploring Anti-Fibrotic Effects of Adipose-Derived Stem Cells: Transcriptome Analysis upon Fibrotic, Inflammatory, and Hypoxic Conditioning
Source: Cells. 2024 Apr 17;13(8):693. doi: 10.3390/cells13080693 (PMC11049044; doi:10.3390/cells13080693)
Supplement: Supplementary file 1 [file cells-13-00693-s001.zip › File S1.xlsx]

## Sheet: FBS
gene_id	FBS	Control	log2FoldChange	pvalue	padj	gene_name
ENSG00000159251	1703.32	12.2958	7.11378	2.40081e-13	2.6316e-11	ACTC1
ENSG00000227619	19.293	0.179238	6.1653	2.27485e-06	4.50429e-05	AL391056.1
ENSG00000125968	4646.24	71.4756	6.02067	1.79366e-98	1.77931e-94	ID1
ENSG00000132854	45.1093	0.751324	5.86786	1.59207e-08	5.91509e-07	KANK4
ENSG00000251281	9.3809	0	5.7069	1.45254e-06	3.04956e-05	AC034223.2
ENSG00000231131	9.25434	0	5.6789	3.30672e-05	0.000437078	LNCAROD
ENSG00000187634	1639.18	32.3032	5.66287	2.17762e-43	3.92763e-40	SAMD11
ENSG00000117318	7481.79	155.906	5.58495	1.21254e-110	2.40569e-106	ID3
ENSG00000115844	54.9903	1.35146	5.33508	4.97179e-13	5.16442e-11	DLX2
ENSG00000171403	7.08509	0	5.30087	1.24308e-05	0.000191927	KRT9
ENSG00000168453	14.6593	0.403851	5.19479	7.65313e-07	1.74104e-05	HR
ENSG00000227145	26.6573	0.935425	4.79499	1.77745e-06	3.63553e-05	IL21-AS1
ENSG00000266278	6.85807	0.208018	4.66996	2.42609e-05	0.000336598	LINC01910
ENSG00000250038	10.1429	0.398301	4.65826	8.23121e-05	0.000927882	AC109588.1
ENSG00000227496	4.4931	0	4.63231	0.000118513	0.00126482	AC099066.2
ENSG00000230836	6.54105	0.208018	4.59633	3.04596e-05	0.000407497	LINC01293
ENSG00000203857	6.07308	0.190284	4.50184	0.000607526	0.00494596	HSD3B1
ENSG00000272398	44.76	2.00075	4.49795	4.33151e-07	1.0649e-05	CD24
ENSG00000124772	16.3699	0.796698	4.37477	0.000458072	0.00395481	CPNE5
ENSG00000119630	465.172	22.9146	4.35054	5.70289e-38	6.28586e-35	PGF
ENSG00000212724	57.356	2.91212	4.29813	0.000354661	0.0031984	KRTAP2-3
ENSG00000248975	5.15995	0.179238	4.26411	0.0013414	0.00942732	AL133372.2
ENSG00000136541	10.2681	0.577539	4.13268	7.908e-05	0.000896541	ERMN
ENSG00000203883	47.513	2.70192	4.12918	1.33587e-07	3.81898e-06	SOX18
ENSG00000179772	13.1199	0.803291	4.05768	4.7338e-05	0.000588093	FOXS1
ENSG00000253802	18.7444	1.11471	4.01803	1.95735e-06	3.95176e-05	SIRLNT
ENSG00000141052	196.517	12.6963	3.94782	8.22773e-12	6.83005e-10	MYOCD
ENSG00000230699	74.9503	4.8618	3.94097	3.40564e-19	8.66254e-17	AL645608.2
ENSG00000150551	42.6791	2.95581	3.86041	2.05834e-12	1.85625e-10	LYPD1
ENSG00000203805	162.422	12.3373	3.71848	2.90428e-24	1.20043e-21	PLPP4
ENSG00000260549	53.1726	3.99759	3.71094	3.06577e-12	2.71539e-10	MT1L
ENSG00000271709	17.8002	1.39069	3.69929	1.19915e-07	3.50384e-06	AC017033.1
ENSG00000253658	24.9154	1.97933	3.67015	1.27371e-09	6.42127e-08	LINC01592
ENSG00000170961	3258.69	256.648	3.66663	8.90651e-07	1.98992e-05	HAS2
ENSG00000163687	45.5241	3.75447	3.60258	1.69938e-06	3.5011e-05	DNASE1L3
ENSG00000128045	40.6913	3.41323	3.55383	4.24951e-09	1.83682e-07	RASL11B
ENSG00000223764	634.201	54.9987	3.52636	9.73932e-17	1.74079e-14	LINC02593
ENSG00000173641	7566.17	663.888	3.51032	9.19938e-22	3.09349e-19	HSPB7
ENSG00000224982	32.0026	2.855	3.50673	0.00010331	0.00112373	TMEM233
ENSG00000198959	5655.63	498.291	3.5048	4.15223e-14	5.14877e-12	TGM2
ENSG00000144063	585.011	51.9346	3.49378	1.70675e-21	5.64365e-19	MALL
ENSG00000105509	437.18	39.3911	3.47328	3.46448e-06	6.46008e-05	HAS1
ENSG00000168874	3160.29	290.899	3.44178	7.3298e-70	3.63558e-66	ATOH8
ENSG00000178401	10.4444	0.936016	3.43467	0.000132837	0.00139222	DNAJC22
ENSG00000171631	50.8521	4.87384	3.39641	7.77391e-06	0.000129066	P2RY6
ENSG00000164161	199.45	19.2257	3.37651	1.98997e-24	8.58284e-22	HHIP
ENSG00000163235	16.4274	1.60617	3.37013	0.000497235	0.00423578	TGFA
ENSG00000205426	35.8563	3.49903	3.35376	8.47243e-07	1.90582e-05	KRT81
ENSG00000128567	7850.83	772.707	3.34482	2.28183e-24	9.63223e-22	PODXL
ENSG00000170396	11.9811	1.18996	3.34284	0.00126107	0.00895478	ZNF804A
ENSG00000173868	11.9526	1.20714	3.33692	0.00020901	0.0020498	PHOSPHO1
ENSG00000258777	27.003	2.7472	3.29769	2.1127e-11	1.53538e-09	HIF1A-AS1
ENSG00000130762	44.0757	4.51089	3.28962	1.67805e-08	6.13602e-07	ARHGEF16
ENSG00000069482	24.1516	2.48209	3.26697	3.87258e-06	7.06826e-05	GAL
ENSG00000227036	116.475	12.3473	3.24315	4.40159e-10	2.46688e-08	LINC00511
ENSG00000101463	229.771	24.8237	3.20794	2.13807e-05	0.000301274	SYNDIG1
ENSG00000106069	37.7019	4.14417	3.19396	2.55541e-10	1.50891e-08	CHN2
ENSG00000283162	19.139	2.07341	3.18462	0.000134096	0.00140098	AL390726.6
ENSG00000158050	262.272	28.9218	3.18096	1.79505e-32	1.54843e-29	DUSP2
ENSG00000272438	15.9112	1.74994	3.17827	7.52522e-05	0.000861017	AL645608.6
ENSG00000100302	143.483	15.9611	3.16992	1.21545e-08	4.61081e-07	RASD2
ENSG00000064300	20.7445	2.28455	3.16776	2.54322e-05	0.000349913	NGFR
ENSG00000261573	45.4518	5.05767	3.16533	2.84179e-06	5.46451e-05	AL157402.2
ENSG00000130433	17.5641	1.95727	3.16329	1.42772e-06	3.00064e-05	CACNG6
ENSG00000124302	8.55634	0.964205	3.1367	0.00023468	0.00227166	CHST8
ENSG00000233818	19.1664	2.21672	3.13195	1.71601e-06	3.52439e-05	AP000695.2
ENSG00000130751	493.763	60.8721	3.0185	2.85844e-09	1.30371e-07	NPAS1
ENSG00000017427	39.5028	4.88512	3.01403	2.83757e-05	0.000384282	IGF1
ENSG00000159167	233.043	29.0048	3.00818	0.000896677	0.00679529	STC1
ENSG00000250986	57.5119	7.15297	3.00326	4.94907e-06	8.70475e-05	LINC02600
ENSG00000124216	316.947	40.3323	2.97549	4.0089e-23	1.50069e-20	SNAI1
ENSG00000055813	337.582	44.0041	2.93895	3.59202e-10	2.04089e-08	CCDC85A
ENSG00000138347	80.4042	10.5866	2.93365	8.06272e-09	3.19929e-07	MYPN
ENSG00000233251	126.541	16.6825	2.92391	4.04572e-08	1.36277e-06	AC007743.1
ENSG00000137868	41.5456	5.42971	2.90465	1.54515e-09	7.58807e-08	STRA6
ENSG00000162723	10.2038	1.36251	2.89393	0.000298391	0.00276768	SLAMF9
ENSG00000172061	973.458	131.205	2.89223	5.3655e-12	4.58843e-10	LRRC15
ENSG00000257335	31.874	4.40093	2.87534	2.80425e-09	1.28491e-07	MGAM
ENSG00000175426	167.017	23.1129	2.853	2.01172e-13	2.22975e-11	PCSK1
ENSG00000269974	8.34597	1.14903	2.84251	0.000778119	0.00605644	AC091057.4
ENSG00000159753	30.1653	4.27853	2.81502	1.3361e-09	6.694e-08	CARMIL2
ENSG00000255364	73.9091	10.6753	2.79826	1.26174e-05	0.000193753	SMILR
ENSG00000064195	142.056	20.4043	2.79769	0.000577232	0.00475395	DLX3
ENSG00000134830	63.7292	9.45436	2.75661	7.5561e-08	2.32784e-06	C5AR2
ENSG00000182870	11.5967	1.71557	2.73089	0.00135269	0.00949321	GALNT9
ENSG00000106537	37.4524	5.72759	2.71101	7.8208e-06	0.000129628	TSPAN13
ENSG00000184588	54.2236	8.5199	2.68483	7.27521e-07	1.66867e-05	PDE4B
ENSG00000232774	60.9706	9.70707	2.64578	2.08038e-10	1.27391e-08	FLJ22447
ENSG00000178726	1557.21	250.393	2.63675	1.29964e-19	3.58124e-17	THBD
ENSG00000104953	9.74656	1.5583	2.63537	0.000299864	0.0027764	TLE6
ENSG00000165061	71.9607	11.7019	2.61731	0.000610918	0.00496746	ZMAT4
ENSG00000138623	7022.54	1169.62	2.58592	1.63994e-15	2.58226e-13	SEMA7A
ENSG00000117152	1363.66	229.908	2.56848	2.99721e-05	0.00040206	RGS4
ENSG00000143333	25.4535	4.29394	2.56541	6.64253e-06	0.000112735	RGS16
ENSG00000214100	24.3508	4.13293	2.56359	2.41668e-06	4.75814e-05	PLAC9P1
ENSG00000146197	17285.3	2925.28	2.56291	1.31806e-05	0.000201466	SCUBE3
ENSG00000101096	20.6202	3.54563	2.5494	6.89531e-07	1.59258e-05	NFATC2
ENSG00000154146	17.9773	3.06662	2.5378	0.000654901	0.00525616	NRGN
ENSG00000138135	211.629	36.8543	2.5236	1.3712e-16	2.42899e-14	CH25H
ENSG00000187583	49.9009	8.81273	2.51074	5.14904e-06	9.00062e-05	PLEKHN1
ENSG00000164764	1074.9	189.245	2.50574	0.00107813	0.00787849	SBSPON
ENSG00000145934	350.149	61.6691	2.50199	1.22169e-12	1.17094e-10	TENM2
ENSG00000213412	12.003	2.0906	2.4926	5.83699e-05	0.000695113	HNRNPA1P33
ENSG00000172159	41.318	7.45357	2.48417	1.55235e-05	0.000231744	FRMD3
ENSG00000250697	10.7679	1.99097	2.45452	0.00141614	0.00985138	AC010343.3
ENSG00000125148	4529.55	830.427	2.44756	2.13253e-11	1.54414e-09	MT2A
ENSG00000271737	16.8608	3.13509	2.43114	1.56421e-05	0.000232812	AC008608.2
ENSG00000168675	231.561	43.5895	2.409	1.17352e-05	0.000182323	LDLRAD4
ENSG00000099282	45.6739	8.84308	2.3772	0.00017917	0.00180078	TSPAN15
ENSG00000041982	3442.57	669.908	2.36118	1.02793e-09	5.33876e-08	TNC
ENSG00000279415	34.8955	6.77898	2.35535	2.3182e-09	1.09247e-07	AC099494.2
ENSG00000120708	127097	25210.1	2.33386	1.07378e-10	7.07767e-09	TGFBI
ENSG00000134668	829.503	165.613	2.32461	3.36152e-06	6.30961e-05	SPOCD1
ENSG00000253230	17.4603	3.52663	2.31523	4.3097e-05	0.000544106	LINC00599
ENSG00000183876	228.465	46.119	2.30944	1.3651e-06	2.89354e-05	ARSI
ENSG00000221852	164.67	33.4456	2.29515	3.22293e-06	6.084e-05	KRTAP1-5
ENSG00000266709	31.6411	6.48558	2.28537	1.03229e-06	2.25308e-05	MGC12916
ENSG00000137834	1759.21	361.29	2.28367	2.11398e-14	2.77758e-12	SMAD6
ENSG00000142661	66.7936	13.7931	2.28034	2.09617e-09	9.94929e-08	MYOM3
ENSG00000157766	10218.4	2114.53	2.27273	0.000400924	0.00354787	ACAN
ENSG00000117525	3186.54	676.44	2.23571	1.20784e-09	6.12879e-08	F3
ENSG00000117399	713.753	153.612	2.21493	1.21743e-12	1.17094e-10	CDC20
ENSG00000250548	26.9719	5.8168	2.20638	1.27297e-06	2.72342e-05	LINC01303
ENSG00000200087	11.7811	2.54518	2.20527	0.00019114	0.00189801	SNORA73B
ENSG00000121621	173.279	37.6542	2.202	4.95674e-15	7.231e-13	KIF18A
ENSG00000127951	1133.1	247.358	2.19585	0.000642457	0.00518145	FGL2
ENSG00000197106	109.81	24.0848	2.1937	1.60964e-10	1.0203e-08	SLC6A17
ENSG00000140416	20895.2	4591.52	2.18607	1.07241e-30	7.59879e-28	TPM1
ENSG00000169679	474.215	104.257	2.1845	1.96128e-11	1.44118e-09	BUB1
ENSG00000120693	773.83	170.44	2.1837	9.25177e-15	1.30181e-12	SMAD9
ENSG00000126787	583.258	129.8	2.16746	1.94565e-10	1.2063e-08	DLGAP5
ENSG00000180875	8101.57	1819.23	2.15491	1.07142e-14	1.4865e-12	GREM2
ENSG00000167900	1044.46	234.984	2.15116	1.31268e-11	1.02534e-09	TK1
ENSG00000120279	57.3196	12.9986	2.14936	1.63654e-13	1.8344e-11	MYCT1
ENSG00000129810	56.2422	12.6573	2.13968	9.3727e-10	4.92103e-08	SGO1
ENSG00000140511	854.596	193.972	2.13903	5.71793e-09	2.3585e-07	HAPLN3
ENSG00000230479	18.1352	4.23756	2.11181	0.000973175	0.0072662	AP000695.1
ENSG00000171617	1345.4	312.593	2.10602	2.46401e-07	6.50079e-06	ENC1
ENSG00000203721	25.8795	6.00389	2.10077	9.51164e-06	0.000153299	LINC00862
ENSG00000103196	651.307	152.469	2.09491	2.44481e-11	1.73853e-09	CRISPLD2
ENSG00000179097	71.3297	16.8785	2.08407	0.00140815	0.00981001	HTR1F
ENSG00000106366	57476.9	13593.4	2.08008	2.65613e-09	1.23703e-07	SERPINE1
ENSG00000249669	553.613	131.289	2.07619	1.99699e-05	0.000283813	CARMN
ENSG00000189056	3200.56	763.045	2.06859	3.45161e-07	8.81336e-06	RELN
ENSG00000186352	490.906	117.079	2.06656	8.32469e-12	6.88174e-10	ANKRD37
ENSG00000100558	72.6897	17.414	2.06546	0.000372055	0.00333705	PLEK2
ENSG00000230417	126.01	30.2131	2.05971	2.72681e-13	2.90361e-11	LINC00856
ENSG00000175315	13.0089	3.11122	2.05942	0.00121992	0.00873444	CST6
ENSG00000024526	373.61	90.4113	2.0453	1.10237e-11	8.96353e-10	DEPDC1
ENSG00000158859	270.267	65.549	2.04441	7.02458e-08	2.18445e-06	ADAMTS4
ENSG00000112984	1058.07	257.033	2.0411	2.7613e-06	5.33958e-05	KIF20A
ENSG00000165480	151.186	36.939	2.02759	9.37576e-10	4.92103e-08	SKA3
ENSG00000248187	236.431	58.0368	2.02358	6.90322e-05	0.000802342	AC078850.1
ENSG00000083454	31.0606	7.67044	2.01845	0.000840799	0.00645567	P2RX5
ENSG00000057657	153.383	38.0259	2.01519	2.55867e-06	4.99154e-05	PRDM1
ENSG00000156103	718.716	177.949	2.01483	2.03369e-11	1.4834e-09	MMP16
ENSG00000106991	24134.9	5977.98	2.01343	6.68056e-51	1.89346e-47	ENG
ENSG00000244300	57.2478	14.1019	2.01267	5.35336e-06	9.33309e-05	GATA2-AS1
ENSG00000260604	294.545	72.9253	2.01167	3.99351e-09	1.72994e-07	AL590004.3
ENSG00000117650	194.82	48.6042	2.00052	1.93063e-09	9.25209e-08	NEK2
ENSG00000105808	55.1122	13.8584	1.99807	1.98067e-05	0.000282303	RASA4
ENSG00000179841	15.3207	3.79434	1.99045	0.000797864	0.00618961	AKAP5
ENSG00000278709	22.6711	5.73357	1.9873	0.000145685	0.00150698	NKILA
ENSG00000054967	123.627	31.2205	1.98705	1.66947e-12	1.52638e-10	RELT
ENSG00000126562	616.15	155.397	1.98703	1.03478e-05	0.000164635	WNK4
ENSG00000166851	633.096	159.771	1.98569	5.07381e-09	2.14636e-07	PLK1
ENSG00000280143	219.215	55.2853	1.98489	4.55649e-06	8.10769e-05	AP000892.3
ENSG00000152760	20.8835	5.26852	1.9821	0.000162101	0.00165436	TCTEX1D1
ENSG00000138944	199.576	50.6725	1.98072	7.66094e-07	1.74104e-05	SHISAL1
ENSG00000071539	436.765	111.084	1.97448	4.58828e-23	1.68577e-20	TRIP13
ENSG00000171241	650.649	165.465	1.97413	7.0296e-10	3.8002e-08	SHCBP1
ENSG00000155090	937.216	239.056	1.97217	4.60064e-19	1.11313e-16	KLF10
ENSG00000116990	18.2305	4.60391	1.96721	1.69465e-05	0.000247948	MYCL
ENSG00000113070	71.6388	18.3323	1.96686	0.000196963	0.00195094	HBEGF
ENSG00000179750	83.1051	21.1917	1.96192	2.20615e-09	1.04463e-07	APOBEC3B
ENSG00000162654	87.674	22.5879	1.96101	3.42537e-10	1.96414e-08	GBP4
ENSG00000089685	817.847	210.978	1.95401	6.3828e-09	2.59157e-07	BIRC5
ENSG00000187699	443.023	114.481	1.95343	1.04658e-05	0.000166114	C2orf88
ENSG00000158825	53.9716	13.9772	1.94546	3.30557e-05	0.000437078	CDA
ENSG00000134986	3719.79	967.574	1.94259	3.39942e-15	5.04832e-13	NREP
ENSG00000073756	346.963	91.1861	1.92866	5.54303e-05	0.000664896	PTGS2
ENSG00000244242	46.3035	12.2164	1.92835	1.46113e-05	0.000219945	IFITM10
ENSG00000115318	1927.51	508.801	1.92179	2.14979e-06	4.28661e-05	LOXL3
ENSG00000164611	380.62	100.503	1.91894	3.26337e-13	3.4439e-11	PTTG1
ENSG00000102879	19.1308	5.07332	1.91189	0.000219057	0.00213672	CORO1A
ENSG00000272767	24.0025	6.44809	1.91113	0.000793442	0.00616121	JMJD1C-AS1
ENSG00000011426	2176.54	578.747	1.91083	2.34312e-10	1.40023e-08	ANLN
ENSG00000265415	84.3861	22.431	1.90751	3.12526e-08	1.06355e-06	AC099850.3
ENSG00000154839	171.348	45.7334	1.90301	6.33251e-08	2.00698e-06	SKA1
ENSG00000129195	335.367	89.6708	1.90141	5.79657e-07	1.36645e-05	PIMREG
ENSG00000110328	42.967	11.4807	1.89325	1.51323e-05	0.000226585	GALNT18
ENSG00000145386	808.497	218.011	1.89012	7.06854e-12	5.9173e-10	CCNA2
ENSG00000100644	21638	5840.25	1.88944	1.54084e-55	6.11404e-52	HIF1A
ENSG00000107821	1394.46	377.383	1.88548	4.54733e-07	1.11519e-05	KAZALD1
ENSG00000139211	555.583	150.874	1.88141	1.44366e-05	0.000217811	AMIGO2
ENSG00000259498	59.4053	16.181	1.87878	3.33143e-06	6.25906e-05	TPM1-AS
ENSG00000090889	362.399	98.7968	1.87406	1.81965e-09	8.78389e-08	KIF4A
ENSG00000118193	365.253	99.689	1.87282	3.45542e-14	4.33896e-12	KIF14
ENSG00000100162	145.42	39.6308	1.87153	6.82755e-24	2.70917e-21	CENPM
ENSG00000134057	1052.24	287.712	1.87	7.87106e-18	1.62668e-15	CCNB1
ENSG00000112742	227.134	62.4353	1.86007	9.11132e-12	7.47409e-10	TTK
ENSG00000257219	14.709	4.08151	1.83738	0.000722628	0.00570422	LINC02407
ENSG00000087586	417.016	116.605	1.83723	1.11547e-12	1.07956e-10	AURKA
ENSG00000117724	1480.97	415.196	1.8345	9.43287e-12	7.70157e-10	CENPF
ENSG00000039068	37.9933	10.6378	1.83204	0.000378474	0.00338697	CDH1
ENSG00000103888	43394.3	12219.3	1.82834	3.16526e-06	5.98654e-05	CEMIP
ENSG00000137812	513.37	144.816	1.8249	1.08283e-09	5.55127e-08	KNL1
ENSG00000144668	170.5	48.2756	1.82169	1.22847e-07	3.57373e-06	ITGA9
ENSG00000168685	390.618	110.522	1.82039	0.00020362	0.00200288	IL7R
ENSG00000117155	787.929	223.711	1.81747	6.46991e-32	5.34846e-29	SSX2IP
ENSG00000137331	1871.29	531.761	1.81515	1.14607e-07	3.36363e-06	IER3
ENSG00000162390	83.6961	23.8866	1.81458	2.67657e-08	9.28378e-07	ACOT11
ENSG00000068489	589.414	167.55	1.81395	1.79749e-15	2.78611e-13	PRR11
ENSG00000166803	146.308	41.5091	1.81074	1.83777e-10	1.14659e-08	PCLAF
ENSG00000072571	348.139	99.1451	1.81008	2.05706e-14	2.7208e-12	HMMR
ENSG00000164035	180.631	51.614	1.80943	0.000512961	0.0043492	EMCN
ENSG00000134690	325.811	93.5679	1.79815	2.07136e-07	5.58367e-06	CDCA8
ENSG00000099860	1138.4	327.387	1.79747	2.32918e-11	1.66226e-09	GADD45B
ENSG00000148773	1751.3	504.834	1.79429	1.03289e-08	3.98688e-07	MKI67
ENSG00000277758	183.611	53.1207	1.78955	7.00579e-05	0.000811412	FO681492.1
ENSG00000233521	34.7982	10.1461	1.77966	0.000588357	0.00481958	LINC01638
ENSG00000185760	478.766	139.558	1.77918	0.000334583	0.00304921	KCNQ5
ENSG00000138778	553.805	161.451	1.77786	4.64545e-17	8.97254e-15	CENPE
ENSG00000143153	441.315	128.737	1.77574	2.96937e-05	0.000399135	ATP1B1
ENSG00000134516	72.0546	21.2129	1.7752	1.71897e-08	6.2308e-07	DOCK2
ENSG00000165617	2462.77	720.501	1.77292	8.75313e-18	1.79033e-15	DACT1
ENSG00000079257	512.071	150.264	1.7687	2.56948e-05	0.000353037	LXN
ENSG00000135451	190.237	56.0556	1.76099	4.84727e-07	1.1728e-05	TROAP
ENSG00000149591	14021.1	4154.36	1.75485	2.15921e-07	5.78119e-06	TAGLN
ENSG00000075218	382.833	113.458	1.75348	3.6563e-07	9.25268e-06	GTSE1
ENSG00000154553	201.054	59.6439	1.75196	1.04974e-08	4.04404e-07	PDLIM3
ENSG00000142945	350.976	104.437	1.74744	2.47985e-06	4.86649e-05	KIF2C
ENSG00000165490	98.6159	29.3444	1.74711	4.69737e-09	2.00421e-07	DDIAS
ENSG00000154920	58.8231	17.5289	1.74179	2.02939e-05	0.000287593	EME1
ENSG00000158008	152.423	45.6246	1.73996	0.000255617	0.00243019	EXTL1
ENSG00000088325	1517.04	456.98	1.73078	8.2812e-13	8.21495e-11	TPX2
ENSG00000273162	19.4866	5.92594	1.72708	0.00122253	0.00874456	AL133215.2
ENSG00000178075	36.7123	11.0026	1.727	0.000375363	0.00336217	GRAMD1C
ENSG00000111057	1885.51	569.92	1.72566	8.2752e-06	0.000136257	KRT18
ENSG00000158402	73.0803	22.0107	1.72333	5.90357e-09	2.41998e-07	CDC25C
ENSG00000100739	240.389	73.1934	1.7167	0.000255064	0.00242891	BDKRB1
ENSG00000224786	11.5292	3.5223	1.71541	0.00087092	0.00663813	CETN4P
ENSG00000047936	21.754	6.55886	1.71442	0.000159562	0.00163265	ROS1
ENSG00000143850	99.7339	30.4663	1.71327	0.000882175	0.00670845	PLEKHA6
ENSG00000143228	163.942	50.2945	1.70367	1.73171e-07	4.75202e-06	NUF2
ENSG00000269113	205.406	63.191	1.70116	0.000735261	0.00578642	TRABD2B
ENSG00000176692	540.88	166.592	1.69933	1.62991e-05	0.000240069	FOXC2
ENSG00000157456	411.361	126.71	1.69823	3.40965e-15	5.04832e-13	CCNB2
ENSG00000232389	34.1401	10.5743	1.69561	3.00037e-07	7.75095e-06	AL583856.1
ENSG00000184661	228.417	70.7478	1.68941	3.82814e-10	2.15157e-08	CDCA2
ENSG00000138180	741.143	230.803	1.68241	7.5001e-08	2.31418e-06	CEP55
ENSG00000137807	848.43	264.332	1.68185	4.47408e-12	3.89323e-10	KIF23
ENSG00000134333	21634.1	6765.85	1.67696	2.88595e-42	4.77143e-39	LDHA
ENSG00000100234	73337.3	22987	1.67373	1.36966e-07	3.90994e-06	TIMP3
ENSG00000169607	298.803	93.664	1.67172	1.26588e-08	4.76354e-07	CKAP2L
ENSG00000168389	48.4363	15.1908	1.67035	1.05883e-05	0.000167923	MFSD2A
ENSG00000114315	241.316	76.0383	1.66591	8.26745e-06	0.000136257	HES1
ENSG00000136492	171.816	54.0842	1.66538	9.69436e-08	2.8836e-06	BRIP1
ENSG00000164418	486.163	154.595	1.65407	2.33789e-08	8.25333e-07	GRIK2
ENSG00000076382	424.946	135.355	1.64969	7.00718e-13	7.05698e-11	SPAG5
ENSG00000130052	41.5361	13.2546	1.64825	1.37549e-07	3.92095e-06	STARD8
ENSG00000091622	79.5844	25.5452	1.64162	7.34845e-05	0.000845983	PITPNM3
ENSG00000095203	48.6445	15.6408	1.64004	0.000414256	0.00363505	EPB41L4B
ENSG00000111863	51.0292	16.5622	1.63496	3.55635e-06	6.59565e-05	ADTRP
ENSG00000285294	50.1386	16.0759	1.63356	0.00049906	0.00424768	LINC00842
ENSG00000035499	41.5799	13.3679	1.63302	1.02392e-06	2.24223e-05	DEPDC1B
ENSG00000159200	2358.68	761.905	1.63004	1.41546e-12	1.33093e-10	RCAN1
ENSG00000174939	83.8837	27.1643	1.62345	7.37676e-06	0.000123611	ASPHD1
ENSG00000175063	316.542	102.856	1.62024	6.48098e-06	0.000110466	UBE2C
ENSG00000186871	105.02	34.1882	1.61679	3.46482e-07	8.82438e-06	ERCC6L
ENSG00000237649	361.905	117.917	1.61661	2.40086e-06	4.73489e-05	KIFC1
ENSG00000172927	75.2492	24.6282	1.61526	6.88033e-05	0.000801556	MYEOV
ENSG00000134198	180.707	58.9604	1.6139	3.4488e-05	0.000453441	TSPAN2
ENSG00000109805	421.035	137.603	1.61193	3.38764e-09	1.51035e-07	NCAPG
ENSG00000138207	84.0713	27.4554	1.61101	1.02505e-06	2.24224e-05	RBP4
ENSG00000246859	269.443	88.3145	1.61058	1.60224e-11	1.21795e-09	STARD4-AS1
ENSG00000198948	791.436	260.24	1.60497	2.4331e-13	2.65235e-11	MFAP3L
ENSG00000237499	21.4809	7.10153	1.60285	9.56058e-05	0.00105437	AL357060.1
ENSG00000168078	365.813	120.503	1.60124	6.89171e-06	0.000116367	PBK
ENSG00000115163	118.251	39.06	1.59628	2.24124e-05	0.000313805	CENPA
ENSG00000169583	905.59	299.822	1.59444	0.000312531	0.00288133	CLIC3
ENSG00000203760	131.918	44.2342	1.58088	4.7661e-12	4.09348e-10	CENPW
ENSG00000239332	75.8237	25.5084	1.57461	5.19959e-09	2.18097e-07	LINC01119
ENSG00000186185	228.37	76.9443	1.56774	3.75269e-07	9.44841e-06	KIF18B
ENSG00000127418	2861.55	970.527	1.5599	9.58948e-21	2.97274e-18	FGFRL1
ENSG00000180998	62.4172	21.2123	1.55987	4.58542e-05	0.00057325	GPR137C
ENSG00000161888	163.634	55.6422	1.55373	1.01908e-07	3.02221e-06	SPC24
ENSG00000105976	1258.13	430.374	1.54783	0.000466455	0.00402194	MET
ENSG00000178999	140.647	47.9892	1.54763	5.02559e-05	0.000614342	AURKB
ENSG00000171848	399.133	136.451	1.54686	1.73237e-05	0.000252352	RRM2
ENSG00000198286	53.4564	18.245	1.54472	0.00125198	0.00891258	CARD11
ENSG00000212232	23.989	8.28379	1.5438	0.000132352	0.00138934	SNORD17
ENSG00000253669	27.9393	9.61197	1.54357	2.50875e-06	4.9038e-05	GASAL1
ENSG00000066279	933.422	320.133	1.54346	3.28823e-07	8.42874e-06	ASPM
ENSG00000198467	20159.3	6929.37	1.54063	1.34982e-08	5.05291e-07	TPM2
ENSG00000167178	61.7555	21.212	1.53916	0.000126702	0.00133925	ISLR2
ENSG00000187741	150.712	52.0159	1.53427	3.6867e-06	6.80411e-05	FANCA
ENSG00000113368	509.103	176.371	1.52827	3.54731e-06	6.59565e-05	LMNB1
ENSG00000080986	285.328	98.8903	1.52795	1.44651e-07	4.07652e-06	NDC80
ENSG00000186193	103.786	36.0366	1.52488	0.00045166	0.00390795	SAPCD2
ENSG00000156970	306.827	107.159	1.51616	4.6183e-07	1.12841e-05	BUB1B
ENSG00000120833	667.228	233.56	1.51401	9.38949e-06	0.000151743	SOCS2
ENSG00000111206	1292.7	452.882	1.51307	6.54084e-08	2.05985e-06	FOXM1
ENSG00000123416	6393.67	2241.7	1.51199	2.64059e-10	1.54998e-08	TUBA1B
ENSG00000131747	2132.51	749.151	1.50906	2.43785e-07	6.44892e-06	TOP2A
ENSG00000197299	47.3831	16.5675	1.50784	1.56569e-05	0.000232858	BLM
ENSG00000213626	1321.25	464.963	1.50645	8.86599e-05	0.000988209	LBH
ENSG00000130176	582.36	205.011	1.5047	4.03272e-06	7.32685e-05	CNN1
ENSG00000118985	4927.38	1739.21	1.50229	5.52345e-11	3.71475e-09	ELL2
ENSG00000100526	164.843	58.1455	1.50193	2.64032e-06	5.13569e-05	CDKN3
ENSG00000125384	154.693	54.6287	1.50149	1.2301e-05	0.000190367	PTGER2
ENSG00000051341	182.337	64.7035	1.49481	3.11703e-09	1.39914e-07	POLQ
ENSG00000065328	104.175	36.9577	1.4914	0.000164301	0.00167219	MCM10
ENSG00000170312	424.687	151.204	1.4887	2.76164e-05	0.000375537	CDK1
ENSG00000173848	588.944	209.982	1.48774	4.8993e-07	1.18171e-05	NET1
ENSG00000170017	13834.9	4933.69	1.48759	4.71475e-18	9.95113e-16	ALCAM
ENSG00000171223	1476.83	528.247	1.48333	2.47864e-14	3.21413e-12	JUNB
ENSG00000282057	160.724	57.6078	1.48184	0.000557583	0.00463446	AC092807.3
ENSG00000132185	175.914	62.9582	1.48173	3.36519e-05	0.000443623	FCRLA
ENSG00000154127	510.828	183.506	1.47705	2.66541e-05	0.000364417	UBASH3B
ENSG00000233328	57.8789	20.8138	1.47177	6.43462e-05	0.000758995	PFN1P1
ENSG00000198826	660.965	238.351	1.47087	6.07987e-16	9.96898e-14	ARHGAP11A
ENSG00000138675	828.141	299.175	1.46931	0.00124805	0.00889084	FGF5
ENSG00000154734	15465.9	5586.4	1.46912	5.68771e-40	7.05276e-37	ADAMTS1
ENSG00000275342	240.55	86.966	1.46551	0.000243117	0.00233129	PRAG1
ENSG00000121904	377.598	136.901	1.46301	3.41799e-06	6.39142e-05	CSMD2
ENSG00000006016	14118.9	5130.92	1.46033	0.000376523	0.00337103	CRLF1
ENSG00000135074	1217.57	442.592	1.4598	3.46293e-06	6.46008e-05	ADAM19
ENSG00000177283	1383.9	503.617	1.4579	1.42649e-12	1.33498e-10	FZD8
ENSG00000081059	624.176	228.051	1.45354	3.18461e-07	8.17368e-06	TCF7
ENSG00000167772	316.496	115.999	1.44821	4.22601e-05	0.000537117	ANGPTL4
ENSG00000117632	1966.86	720.725	1.4482	1.49525e-07	4.19008e-06	STMN1
ENSG00000147100	938.643	344.272	1.44731	0.000139995	0.00145647	SLC16A2
ENSG00000040275	1010.12	370.901	1.44563	1.98876e-29	1.36058e-26	SPDL1
ENSG00000100206	27.5062	10.1104	1.44442	7.39628e-05	0.000850187	DMC1
ENSG00000101194	521.796	191.976	1.44307	5.5633e-15	7.95958e-13	SLC17A9
ENSG00000257261	40.1238	14.6876	1.44209	2.08734e-05	0.000294964	AC008014.1
ENSG00000154319	326.236	120.28	1.4417	5.44774e-09	2.27543e-07	FAM167A
ENSG00000183023	606.635	223.424	1.44083	1.65003e-23	6.41895e-21	SLC8A1
ENSG00000179218	25618.7	9475.94	1.43482	8.43572e-45	1.67365e-41	CALR
ENSG00000131724	2814.84	1043.12	1.43226	2.88095e-29	1.85871e-26	IL13RA1
ENSG00000144655	308.523	114.635	1.43043	5.22535e-14	6.36018e-12	CSRNP1
ENSG00000061337	52.1031	19.2665	1.42816	3.85944e-05	0.000497071	LZTS1
ENSG00000101447	325.527	120.904	1.42759	9.12263e-09	3.56042e-07	FAM83D
ENSG00000185697	244.122	90.9507	1.42298	3.9102e-06	7.12381e-05	MYBL1
ENSG00000129667	242.972	90.7752	1.42178	5.50769e-06	9.55179e-05	RHBDF2
ENSG00000136603	2025.31	757.134	1.41963	3.4356e-13	3.60647e-11	SKIL
ENSG00000187193	37.1093	13.8698	1.416	4.40233e-06	7.87576e-05	MT1X
ENSG00000232004	40.3585	15.1495	1.41349	2.99948e-05	0.000402093	CAP1P2
ENSG00000260063	16.7004	6.26336	1.413	0.000665297	0.00532452	AL512408.1
ENSG00000164465	1057.65	397.612	1.41133	4.33449e-09	1.86543e-07	DCBLD1
ENSG00000152253	82.2928	30.8615	1.41102	0.000398281	0.0035347	SPC25
ENSG00000176170	2104.79	791.814	1.4106	5.21056e-08	1.68367e-06	SPHK1
ENSG00000123485	292.959	110.538	1.4052	1.89966e-07	5.15586e-06	HJURP
ENSG00000006327	3085.37	1168.27	1.40086	1.04392e-07	3.08665e-06	TNFRSF12A
ENSG00000153044	175.806	66.9415	1.39108	2.55731e-13	2.75744e-11	CENPH
ENSG00000166598	20436.1	7810.49	1.38762	6.5921e-33	5.94488e-30	HSP90B1
ENSG00000011422	1049.64	402.395	1.38307	3.77068e-05	0.000487999	PLAUR
ENSG00000164687	95.4	36.4577	1.3822	1.33119e-05	0.00020316	FABP5
ENSG00000235387	68.1977	26.1824	1.38207	6.37722e-05	0.000752672	SPAAR
ENSG00000163507	304.99	117.11	1.38109	1.61582e-11	1.21932e-09	CIP2A
ENSG00000143942	34.5489	13.2133	1.37914	0.000982783	0.00731373	CHAC2
ENSG00000137804	57.9048	22.2127	1.378	3.22259e-05	0.000427953	NUSAP1
ENSG00000152056	122.245	47.0754	1.37314	2.03057e-06	4.08172e-05	AP1S3
ENSG00000075702	191.199	73.8016	1.37081	2.5698e-08	8.96044e-07	WDR62
ENSG00000142347	61.488	23.9227	1.36714	0.000408692	0.00359896	MYO1F
ENSG00000147536	148.514	57.5792	1.36272	1.43359e-12	1.33532e-10	GINS4
ENSG00000161544	3498.91	1361.41	1.36187	6.7661e-05	0.000790109	CYGB
ENSG00000121152	163.966	63.9132	1.3569	7.52349e-05	0.000861017	NCAPH
ENSG00000124126	77.5498	30.3944	1.35478	4.66888e-05	0.000581485	PREX1
ENSG00000138678	67.4797	26.5202	1.35398	3.90751e-05	0.00050144	GPAT3
ENSG00000138182	400.081	156.523	1.35328	3.71126e-13	3.87534e-11	KIF20B
ENSG00000279881	41.8832	16.3968	1.35086	1.86449e-06	3.79011e-05	AC041040.1
ENSG00000115884	1916.21	752.281	1.34893	2.7258e-05	0.000371684	SDC1
ENSG00000104356	292.929	115.102	1.34705	3.19742e-12	2.81942e-10	POP1
ENSG00000138685	8009.18	3150.09	1.34627	1.45472e-10	9.28028e-09	FGF2
ENSG00000134285	892.757	352.172	1.34269	1.83912e-31	1.45953e-28	FKBP11
ENSG00000112183	176.328	69.5529	1.34233	0.000129461	0.00136333	RBM24
ENSG00000177822	222.179	87.7681	1.33986	2.61364e-07	6.85909e-06	AC098864.1
ENSG00000214026	190.791	75.4451	1.3389	7.92503e-05	0.000897959	MRPL23
ENSG00000181544	42.5533	16.7825	1.33809	0.000578158	0.00475763	FANCB
ENSG00000145681	773.98	307.034	1.33315	2.85891e-06	5.49088e-05	HAPLN1
ENSG00000104812	1444.41	573.566	1.33236	2.12154e-27	1.0482e-24	GYS1
ENSG00000163535	395.772	157.503	1.33009	1.38764e-13	1.57319e-11	SGO2
ENSG00000102172	1831.52	728.437	1.32975	7.09513e-18	1.48176e-15	SMS
ENSG00000013810	819.673	326.326	1.32823	1.94837e-08	7.00284e-07	TACC3
ENSG00000231607	48.6494	19.358	1.32696	1.06924e-05	0.000169168	DLEU2
ENSG00000142731	144.278	57.5424	1.32482	9.77682e-07	2.15285e-05	PLK4
ENSG00000276043	528.925	211.087	1.32431	8.06771e-05	0.000912042	UHRF1
ENSG00000176697	505.688	201.983	1.3241	8.6258e-06	0.000141201	BDNF
ENSG00000134222	197.02	78.6552	1.32406	3.81451e-10	2.14999e-08	PSRC1
ENSG00000101665	2247.63	898.902	1.32241	3.63585e-05	0.00047395	SMAD7
ENSG00000163659	852.408	341.285	1.32119	9.62701e-05	0.00106111	TIPARP
ENSG00000189159	1224.73	490.136	1.32042	5.5535e-13	5.73862e-11	JPT1
ENSG00000111665	305.162	122.207	1.31945	5.90968e-08	1.88527e-06	CDCA3
ENSG00000285964	57.4746	23.0569	1.31791	0.00028007	0.00261733	AC002074.2
ENSG00000120738	586.41	235.318	1.31775	3.03633e-06	5.76466e-05	EGR1
ENSG00000282849	49.2488	19.7174	1.3146	0.000133623	0.00139825	AL359834.1
ENSG00000138160	664.618	267.122	1.31455	1.17547e-10	7.69678e-09	KIF11
ENSG00000164109	347.963	140.117	1.31062	5.16659e-10	2.8553e-08	MAD2L1
ENSG00000135476	228.077	92.2432	1.30432	7.32967e-07	1.67729e-05	ESPL1
ENSG00000081189	307.857	124.867	1.30428	7.32102e-14	8.74995e-12	MEF2C
ENSG00000116771	48.0316	19.4622	1.30356	1.03106e-05	0.000164265	AGMAT
ENSG00000183856	644.204	260.926	1.30351	0.000511191	0.00433791	IQGAP3
ENSG00000157064	479.047	194.035	1.30313	1.90891e-06	3.86457e-05	NMNAT2
ENSG00000238273	43.1204	17.5129	1.30262	0.000365203	0.00328451	AC108058.1
ENSG00000146918	801.675	326.099	1.29708	3.95832e-11	2.71741e-09	NCAPG2
ENSG00000122952	341.929	139.109	1.29597	4.39853e-08	1.45931e-06	ZWINT
ENSG00000270607	49.9938	20.4328	1.29568	9.83474e-05	0.001081	AC009549.1
ENSG00000095752	124.81	50.9388	1.29164	1.76283e-06	3.60935e-05	IL11
ENSG00000139734	650.924	266.41	1.28816	5.14883e-05	0.000627089	DIAPH3
ENSG00000141526	2633.53	1080.91	1.28467	7.13606e-06	0.000119881	SLC16A3
ENSG00000153976	331.774	136.466	1.28155	3.90523e-06	7.12131e-05	HS3ST3A1
ENSG00000113739	11772.6	4847.31	1.2802	3.58302e-07	9.09653e-06	STC2
ENSG00000213654	66.5969	27.3652	1.27807	3.53001e-05	0.000462891	GPSM3
ENSG00000164674	124.302	51.4545	1.27736	8.33017e-09	3.27918e-07	SYTL3
ENSG00000078269	2072.99	857.479	1.27381	1.57077e-05	0.000233438	SYNJ2
ENSG00000139278	1662.99	688.431	1.27244	3.3725e-05	0.000444292	GLIPR1
ENSG00000175592	1246.24	517.396	1.26837	0.000443231	0.00384845	FOSL1
ENSG00000167553	2898.16	1208.58	1.26166	1.12704e-09	5.763e-08	TUBA1C
ENSG00000167157	1707.19	712.942	1.25969	2.67731e-06	5.19743e-05	PRRX2
ENSG00000163808	134.636	56.229	1.25945	1.36419e-06	2.89354e-05	KIF15
ENSG00000177602	61.0811	25.563	1.2513	0.000603952	0.0049238	HASPIN
ENSG00000243444	45.269	19.027	1.24844	0.000370443	0.0033256	PALM2
ENSG00000139874	1818.18	766.126	1.24666	5.35669e-05	0.000647634	SSTR1
ENSG00000183578	266.526	112.603	1.24516	0.000552631	0.00460293	TNFAIP8L3
ENSG00000170190	577.374	244.238	1.24162	4.55623e-09	1.94818e-07	SLC16A5
ENSG00000197019	450.956	191.231	1.23864	1.55301e-16	2.72669e-14	SERTAD1
ENSG00000103187	6006.14	2552.77	1.23436	5.57952e-07	1.32098e-05	COTL1
ENSG00000179348	294.584	125.266	1.23319	1.15646e-05	0.000179954	GATA2
ENSG00000136026	12824.3	5456.21	1.23287	2.35479e-19	6.31338e-17	CKAP4
ENSG00000161800	893.874	381.711	1.22709	1.09589e-08	4.1893e-07	RACGAP1
ENSG00000146670	286.102	122.155	1.22645	6.15431e-05	0.000730272	CDCA5
ENSG00000162063	238.01	101.64	1.22642	1.12495e-06	2.44457e-05	CCNF
ENSG00000184226	466.967	199.829	1.22525	6.78368e-06	0.000114684	PCDH9
ENSG00000259330	596.418	255.449	1.22344	0.000149025	0.00153593	INAFM2
ENSG00000075624	120199	51499.6	1.22278	3.512e-09	1.55851e-07	ACTB
ENSG00000136122	69.3828	29.7708	1.22095	2.6549e-06	5.15897e-05	BORA
ENSG00000139793	5166.43	2217.67	1.22006	2.34683e-12	2.09735e-10	MBNL2
ENSG00000228626	29.7602	12.7844	1.21848	0.00139137	0.00972003	AC245100.3
ENSG00000155816	1583.09	681.245	1.21638	1.12364e-06	2.44442e-05	FMN2
ENSG00000119938	2978.73	1286.49	1.21135	1.08879e-05	0.000171157	PPP1R3C
ENSG00000166016	496.173	214.537	1.21089	1.70259e-08	6.18671e-07	ABTB2
ENSG00000134294	28537.5	12328.2	1.21089	4.65812e-17	8.97254e-15	SLC38A2
ENSG00000206190	1664.46	720.468	1.20793	2.25771e-06	4.47481e-05	ATP10A
ENSG00000050438	129.16	55.9792	1.20626	7.37194e-10	3.96367e-08	SLC4A8
ENSG00000164484	4180.42	1813.15	1.20523	0.000276233	0.00259292	TMEM200A
ENSG00000171793	672.138	291.768	1.20314	2.37469e-10	1.41483e-08	CTPS1
ENSG00000169715	642.479	279.131	1.20186	3.16308e-08	1.07458e-06	MT1E
ENSG00000133657	8879.9	3875.82	1.19607	3.13865e-07	8.06897e-06	ATP13A3
ENSG00000110660	163.325	71.4008	1.19391	7.09852e-06	0.000119453	SLC35F2
ENSG00000115738	3508.55	1536.61	1.19103	9.21308e-05	0.00102267	ID2
ENSG00000152952	4224.88	1856.9	1.186	0.00121479	0.00870091	PLOD2
ENSG00000164574	4024.1	1770.54	1.18448	2.15467e-11	1.5545e-09	GALNT10
ENSG00000067057	2991.49	1316.61	1.18398	8.59533e-08	2.60751e-06	PFKP
ENSG00000188486	1175.73	517.52	1.1834	1.61863e-10	1.02273e-08	H2AFX
ENSG00000109762	2293.32	1010.03	1.18289	2.35887e-28	1.33714e-25	SNX25
ENSG00000144959	805.597	355.695	1.17966	1.1262e-07	3.31018e-06	NCEH1
ENSG00000151414	15540	6862.95	1.17903	1.73287e-11	1.2937e-09	NEK7
ENSG00000120129	2187.2	966.481	1.17817	4.09781e-07	1.01499e-05	DUSP1
ENSG00000087116	9021.94	3994.43	1.17536	1.58297e-09	7.73551e-08	ADAMTS2
ENSG00000137573	30952.5	13732.7	1.17244	0.000312436	0.00288133	SULF1
ENSG00000185480	128.747	57.12	1.17089	4.43331e-09	1.89972e-07	PARPBP
ENSG00000118523	26173.6	11626.7	1.17063	2.83071e-10	1.64696e-08	CTGF
ENSG00000171889	113.995	50.7606	1.17035	9.21637e-05	0.00102267	MIR31HG
ENSG00000169213	2456.83	1092.99	1.16851	2.09724e-05	0.000296151	RAB3B
ENSG00000155660	4704.85	2099.22	1.16428	6.07175e-21	1.91212e-18	PDIA4
ENSG00000051523	1156.56	516.233	1.16387	1.55468e-19	4.22531e-17	CYBA
ENSG00000163171	4904.29	2189.23	1.16342	4.29685e-14	5.295e-12	CDC42EP3
ENSG00000161638	13587.9	6073.63	1.16169	8.10421e-06	0.00013399	ITGA5
ENSG00000224687	40.7743	18.355	1.15933	0.000177416	0.00178677	RASAL2-AS1
ENSG00000072133	157.257	70.4469	1.15864	5.70504e-09	2.3585e-07	RPS6KA6
ENSG00000115641	4958.8	2225.24	1.15583	1.16602e-11	9.44242e-10	FHL2
ENSG00000113369	748.637	336.377	1.15482	1.34978e-13	1.53906e-11	ARRDC3
ENSG00000104524	354.77	160.066	1.14716	5.11922e-09	2.15893e-07	PYCR3
ENSG00000100479	49.0711	22.1303	1.14694	0.000844084	0.00647396	POLE2
ENSG00000154380	5552.81	2517.56	1.1411	9.01607e-20	2.59245e-17	ENAH
ENSG00000128228	328.324	148.943	1.13838	9.26275e-09	3.59634e-07	SDF2L1
ENSG00000127946	460.919	209.512	1.13821	5.57245e-09	2.31777e-07	HIP1
ENSG00000188985	162.426	73.7922	1.13544	2.74424e-08	9.50188e-07	DHFRP1
ENSG00000107796	2158.56	982.577	1.13539	4.20235e-08	1.41041e-06	ACTA2
ENSG00000123219	166.895	75.8533	1.13332	1.96457e-10	1.21424e-08	CENPK
ENSG00000211455	1539.6	702.72	1.13175	9.30183e-13	9.18151e-11	STK38L
ENSG00000105329	4914.65	2248.1	1.12842	3.58848e-09	1.57719e-07	TGFB1
ENSG00000140525	460.015	210.46	1.12724	5.35712e-10	2.94419e-08	FANCI
ENSG00000107984	10383.2	4755.32	1.12662	6.5793e-05	0.000773302	DKK1
ENSG00000074047	1222.33	559.982	1.12644	1.57229e-13	1.7724e-11	GLI2
ENSG00000151150	192.626	88.4815	1.12313	0.000952962	0.00713733	ANK3
ENSG00000113273	2983.22	1369.99	1.12281	1.30167e-07	3.74278e-06	ARSB
ENSG00000125257	1058.84	486.479	1.12242	1.63579e-08	6.03237e-07	ABCC4
ENSG00000119969	148.282	68.0784	1.12226	1.8178e-06	3.71422e-05	HELLS
ENSG00000141753	42983.2	19804.3	1.11795	1.02363e-09	5.33041e-08	IGFBP4
ENSG00000144395	32.7236	15.14	1.11687	0.00034006	0.0030906	CCDC150
ENSG00000170345	101.734	46.881	1.11545	4.54498e-06	8.09692e-05	FOS
ENSG00000104881	603.625	278.532	1.11489	8.40944e-05	0.000944607	PPP1R13L
ENSG00000100297	659.53	304.732	1.11352	0.000128822	0.00135876	MCM5
ENSG00000257038	47.0103	21.78	1.11167	4.61806e-05	0.000575781	AP002761.3
ENSG00000101000	1276.81	595.165	1.10141	0.000405485	0.00358025	PROCR
ENSG00000122483	162.804	75.8793	1.10038	5.99324e-09	2.45084e-07	CCDC18
ENSG00000131149	2230.67	1041.09	1.09949	1.58334e-16	2.7316e-14	GSE1
ENSG00000170421	500.994	233.82	1.09907	0.00104431	0.00767372	KRT8
ENSG00000125966	132.928	62.1685	1.09728	5.62242e-05	0.000672386	MMP24
ENSG00000238271	54.6796	25.7906	1.08411	0.000450519	0.00390489	IFNWP19
ENSG00000108106	1435.5	677.16	1.08359	4.59326e-06	8.15119e-05	UBE2S
ENSG00000218336	4062.67	1919.41	1.08174	3.41323e-07	8.7266e-06	TENM3
ENSG00000214114	156.299	73.7241	1.08134	1.57263e-06	3.27398e-05	MYCBP
ENSG00000114737	45.4606	21.3607	1.08109	0.000314141	0.00288946	CISH
ENSG00000151276	1896.48	897.091	1.07998	1.54734e-07	4.31774e-06	MAGI1
ENSG00000198805	398.208	188.582	1.07905	7.51419e-07	1.71358e-05	PNP
ENSG00000184557	593.584	281.261	1.07784	0.000160061	0.00163692	SOCS3
ENSG00000121281	1075.88	509.779	1.07783	4.85943e-05	0.000599198	ADCY7
ENSG00000144554	164.17	77.7953	1.07542	6.8801e-08	2.14287e-06	FANCD2
ENSG00000184988	182.465	86.8652	1.07316	2.65779e-05	0.000363909	TMEM106A
ENSG00000159784	162.21	77.2659	1.07172	0.000509195	0.00432282	FAM131B
ENSG00000204899	585.084	279.477	1.06462	1.41325e-14	1.92047e-12	MZT1
ENSG00000175505	356.044	169.975	1.06449	1.21147e-10	7.85478e-09	CLCF1
ENSG00000115363	623.392	298.578	1.06283	1.37725e-12	1.3074e-10	EVA1A
ENSG00000165891	284.07	136.33	1.06142	4.8061e-07	1.16711e-05	E2F7
ENSG00000151725	142.489	68.2839	1.05859	0.00128845	0.00912631	CENPU
ENSG00000117877	99.2243	47.7144	1.05434	0.00140788	0.00981001	CD3EAP
ENSG00000146410	38.5887	18.6194	1.05378	0.00013817	0.00144051	MTFR2
ENSG00000228716	597.807	288.203	1.05216	2.84724e-10	1.65173e-08	DHFR
ENSG00000111669	7481.37	3607.68	1.05212	1.7649e-15	2.75713e-13	TPI1
ENSG00000181938	51.2875	24.7449	1.04938	0.000125436	0.00132751	GINS3
ENSG00000108829	3608.09	1744.45	1.04835	3.33662e-10	1.92438e-08	LRRC59
ENSG00000113810	1518.66	734.916	1.04755	1.22724e-19	3.42936e-17	SMC4
ENSG00000175550	3111	1505.51	1.04701	4.56501e-08	1.50698e-06	DRAP1
ENSG00000261061	124.581	60.1292	1.04668	6.72636e-07	1.56449e-05	AC092718.4
ENSG00000134013	18231.4	8830.01	1.04593	0.000394975	0.00351089	LOXL2
ENSG00000102384	140.682	68.1643	1.04275	1.24941e-05	0.000192458	CENPI
ENSG00000184009	75364.7	36642.7	1.04035	1.54119e-09	7.58739e-08	ACTG1
ENSG00000160613	990.409	481.656	1.0401	6.58087e-08	2.06589e-06	PCSK7
ENSG00000065485	996.596	486.181	1.03633	2.70535e-11	1.90334e-09	PDIA5
ENSG00000133816	9197.03	4485.04	1.03605	0.000248417	0.00237523	MICAL2
ENSG00000103257	4287.29	2094.26	1.03352	0.00086766	0.00662346	SLC7A5
ENSG00000128944	283.706	138.568	1.03262	3.11653e-07	8.03012e-06	KNSTRN
ENSG00000171310	810.423	396.353	1.03214	0.000189163	0.0018829	CHST11
ENSG00000137124	1064.74	520.676	1.03157	1.67688e-09	8.13429e-08	ALDH1B1
ENSG00000128340	820.158	401.546	1.0305	0.000227249	0.00220578	RAC2
ENSG00000139209	211.377	103.585	1.02999	0.000384117	0.00343129	SLC38A4
ENSG00000104885	1207.39	592.199	1.02758	1.05331e-08	4.04769e-07	DOT1L
ENSG00000147065	14592.4	7159.99	1.02716	9.11658e-12	7.47409e-10	MSN
ENSG00000117308	251.422	123.332	1.0271	6.5738e-06	0.00011176	GALE
ENSG00000104611	2810.35	1379.63	1.02634	0.000653161	0.00524494	SH2D4A
ENSG00000165304	375.618	184.462	1.02515	0.000202015	0.00199292	MELK
ENSG00000239672	406.464	199.495	1.02491	1.58294e-07	4.39854e-06	NME1
ENSG00000143401	1190.67	585.515	1.02366	6.64922e-15	9.42289e-13	ANP32E
ENSG00000003096	101.869	50.3338	1.01911	7.87298e-05	0.000893081	KLHL13
ENSG00000176619	3362.32	1659.39	1.01872	1.27519e-09	6.42127e-08	LMNB2
ENSG00000137563	674.887	333.185	1.01816	1.35128e-06	2.87038e-05	GGH
ENSG00000221869	1942.2	959.425	1.01726	1.90703e-05	0.000273181	CEBPD
ENSG00000188522	678.003	335.127	1.01658	3.80715e-05	0.000491454	FAM83G
ENSG00000111247	114.724	56.6453	1.01589	0.000567874	0.00468926	RAD51AP1
ENSG00000188610	37.8811	18.8057	1.01579	0.000286714	0.00266936	FAM72B
ENSG00000134602	154.979	76.7016	1.01411	8.16312e-05	0.00092073	STK26
ENSG00000198830	4623.16	2291.36	1.01255	2.45724e-10	1.45963e-08	HMGN2
ENSG00000159259	121.45	60.1929	1.01232	4.84211e-05	0.000598172	CHAF1B
ENSG00000123374	308.051	152.663	1.01169	1.83699e-10	1.14659e-08	CDK2
ENSG00000185164	2551.07	1265.44	1.0114	7.19568e-05	0.000831463	NOMO2
ENSG00000108960	93.295	46.275	1.01091	0.000940316	0.00706929	MMD
ENSG00000273382	36.7388	18.3443	1.01007	0.000927035	0.00698798	AL356488.3
ENSG00000233901	243.581	121.003	1.00924	0.000403993	0.00356866	LINC01503
ENSG00000125753	2156.93	1072.12	1.00834	5.24896e-07	1.25318e-05	VASP
ENSG00000096060	103.336	51.4932	1.00728	9.94692e-05	0.00109092	FKBP5
ENSG00000179222	7459.5	3715.32	1.00553	4.85583e-17	9.1032e-15	MAGED1
ENSG00000162631	260.045	129.767	1.00319	0.000837174	0.00643293	NTNG1
ENSG00000100003	147.324	73.5696	1.00317	0.000760668	0.00595802	SEC14L2
ENSG00000139194	44.1699	88.6241	-1.00061	7.70432e-05	0.000877461	RBP5
ENSG00000198873	670.489	1341.74	-1.00066	4.44793e-06	7.95018e-05	GRK5
ENSG00000215883	102.801	205.844	-1.00129	7.90701e-08	2.42465e-06	CYB5RL
ENSG00000254860	23.6229	47.2698	-1.00448	0.000264513	0.00250021	TMEM9B-AS1
ENSG00000176485	224.51	450.81	-1.00553	0.000985964	0.00733465	PLA2G16
ENSG00000143630	90.0648	181.642	-1.0079	5.12938e-07	1.23204e-05	HCN3
ENSG00000112759	280.597	564.715	-1.00859	0.000141567	0.00146957	SLC29A1
ENSG00000133069	43.4358	87.5312	-1.01033	0.000138431	0.00144247	TMCC2
ENSG00000007255	65.4036	132.336	-1.01681	0.000150916	0.00155299	TRAPPC6A
ENSG00000103056	18.1557	37.0298	-1.0173	0.000421485	0.00368707	SMPD3
ENSG00000228526	155.722	315.561	-1.01781	0.000733983	0.00578095	MIR34AHG
ENSG00000159231	117.408	237.924	-1.01809	5.94486e-06	0.000102398	CBR3
ENSG00000233223	47.1751	95.6087	-1.01878	0.000231972	0.00224722	AC016876.1
ENSG00000162426	42.9017	87.3486	-1.02133	5.43143e-06	9.4526e-05	SLC45A1
ENSG00000179818	115.026	233.803	-1.02208	4.74055e-07	1.15544e-05	PCBP1-AS1
ENSG00000129675	265.798	540.138	-1.02245	1.62544e-07	4.50402e-06	ARHGEF6
ENSG00000080573	965.257	1967.86	-1.02791	6.78626e-06	0.000114684	COL5A3
ENSG00000109458	290.232	592.035	-1.02811	2.72164e-17	5.39974e-15	GAB1
ENSG00000250303	44.2958	90.4013	-1.02855	0.000102148	0.00111537	AP002884.1
ENSG00000254810	42.6529	87.882	-1.0364	2.84812e-05	0.000385185	AP001189.3
ENSG00000174628	64.1423	132.069	-1.03909	4.34949e-06	7.81648e-05	IQCK
ENSG00000134574	387.725	798.59	-1.04206	3.17296e-05	0.000423061	DDB2
ENSG00000168765	215.123	443.53	-1.04305	1.66598e-11	1.25201e-09	GSTM4
ENSG00000130653	115.526	238.407	-1.04438	0.000118463	0.00126482	PNPLA7
ENSG00000180447	1262.35	2605.89	-1.0456	3.96216e-07	9.88796e-06	GAS1
ENSG00000214021	368.507	761.369	-1.04612	0.000493384	0.0042084	TTLL3
ENSG00000197355	362.207	748.324	-1.04665	3.30986e-06	6.22442e-05	UAP1L1
ENSG00000205593	77.1043	159.699	-1.04713	3.7792e-06	6.93611e-05	DENND6B
ENSG00000100364	1614.48	3336.12	-1.04728	1.11873e-25	5.04447e-23	KIAA0930
ENSG00000119917	651.588	1348.31	-1.04896	0.000224346	0.00218081	IFIT3
ENSG00000177042	345.406	716.393	-1.05221	8.85481e-10	4.69731e-08	TMEM80
ENSG00000114739	28.7059	59.5529	-1.05845	5.48074e-05	0.000658891	ACVR2B
ENSG00000162522	379.499	790.575	-1.05888	0.000951402	0.00713372	KIAA1522
ENSG00000013441	520.235	1084.14	-1.05919	5.06277e-05	0.000617745	CLK1
ENSG00000144134	75.8566	158.803	-1.06281	3.27071e-05	0.000433473	RABL2A
ENSG00000185215	1406.05	2948	-1.06792	4.5475e-08	1.50371e-06	TNFAIP2
ENSG00000285669	14.7852	31.0088	-1.06793	0.000729497	0.00575247	AC026979.4
ENSG00000198743	1152.85	2418.26	-1.06862	1.08957e-05	0.000171157	SLC5A3
ENSG00000101353	23.1179	48.7149	-1.06917	0.000298601	0.0027683	MROH8
ENSG00000042286	383.096	803.967	-1.06958	1.32944e-18	3.03173e-16	AIFM2
ENSG00000124104	858.448	1804.05	-1.07109	3.54245e-09	1.56531e-07	SNX21
ENSG00000165804	692.457	1455.22	-1.07162	6.61151e-05	0.000776167	ZNF219
ENSG00000168763	189.8	398.794	-1.07217	3.94581e-16	6.6343e-14	CNNM3
ENSG00000250067	25.0417	52.6883	-1.07382	0.00115284	0.00831722	YJEFN3
ENSG00000235954	29.8807	63.2487	-1.07542	0.00039973	0.00354204	TTC28-AS1
ENSG00000065833	841.585	1773.72	-1.07575	3.94649e-07	9.87e-06	ME1
ENSG00000168026	59.3949	125.38	-1.07581	0.000230666	0.00223566	TTC21A
ENSG00000167994	494.11	1043.56	-1.07789	1.3355e-10	8.57485e-09	RAB3IL1
ENSG00000176928	83.978	177.281	-1.07852	0.000730253	0.00575615	GCNT4
ENSG00000138131	714.372	1509.12	-1.07947	0.000264046	0.00249699	LOXL4
ENSG00000276600	191.259	404.54	-1.08096	3.62458e-06	6.69569e-05	RAB7B
ENSG00000161682	86.0246	181.789	-1.0814	0.000141624	0.00146957	FAM171A2
ENSG00000177000	538.094	1139.96	-1.08266	2.08466e-09	9.91838e-08	MTHFR
ENSG00000182871	1254.36	2657.62	-1.0833	0.000981821	0.00730932	COL18A1
ENSG00000079435	51.7192	109.516	-1.08382	0.000282475	0.00263732	LIPE
ENSG00000261338	33.5608	71.2407	-1.084	0.000149692	0.0015412	AC021016.2
ENSG00000254602	18.2335	38.7451	-1.08762	6.21982e-05	0.000736723	AP000662.1
ENSG00000110852	103.526	220.579	-1.09193	0.000115009	0.00123607	CLEC2B
ENSG00000214174	79.7363	170.193	-1.09242	5.79929e-06	0.000100225	AMZ2P1
ENSG00000154309	110.797	236.298	-1.09286	4.57302e-05	0.00057206	DISP1
ENSG00000103994	2149.6	4599.36	-1.09733	3.61065e-10	2.04089e-08	ZNF106
ENSG00000205090	39.6361	84.9975	-1.09757	3.28378e-06	6.1871e-05	TMEM240
ENSG00000176428	36.862	78.842	-1.09758	2.02314e-05	0.000287118	VPS37D
ENSG00000235863	67.7901	145.811	-1.09979	2.35956e-05	0.000328517	B3GALT4
ENSG00000069702	1985.91	4256.84	-1.0999	7.64066e-06	0.000127173	TGFBR3
ENSG00000260630	99.2506	212.852	-1.10006	2.77954e-10	1.62673e-08	SNAI3-AS1
ENSG00000262580	20.0592	43.0193	-1.10015	0.00080795	0.0062494	AC087741.1
ENSG00000138413	2016.69	4324.5	-1.10057	3.15326e-21	1.02559e-18	IDH1
ENSG00000260077	49.2863	105.927	-1.10118	5.21597e-07	1.24831e-05	AC104794.2
ENSG00000167549	128.021	275.021	-1.10197	0.000262896	0.00248729	CORO6
ENSG00000163071	548.758	1178.18	-1.10208	6.56373e-08	2.06378e-06	SPATA18
ENSG00000157514	771.755	1657.03	-1.10242	0.000313147	0.00288299	TSC22D3
ENSG00000132840	257.055	553.046	-1.10475	0.00090143	0.0068287	BHMT2
ENSG00000121310	300.121	646.152	-1.10576	1.20735e-11	9.69582e-10	ECHDC2
ENSG00000198483	69.1449	148.938	-1.10654	0.000116138	0.00124685	ANKRD35
ENSG00000177989	39.3867	84.6769	-1.1076	3.46765e-05	0.000455617	ODF3B
ENSG00000100321	216.542	467.287	-1.10797	1.23055e-11	9.76565e-10	SYNGR1
ENSG00000196227	185.162	399.137	-1.1081	4.68046e-15	6.87854e-13	FAM217B
ENSG00000180881	27.9584	60.2693	-1.10957	2.12992e-05	0.000300339	CAPS2
ENSG00000235703	25.7024	55.7502	-1.10983	0.000524682	0.00442791	LINC00894
ENSG00000168071	16.8373	36.4122	-1.11098	0.000539109	0.00451305	CCDC88B
ENSG00000114268	65.3013	140.647	-1.11157	3.55713e-06	6.59565e-05	PFKFB4
ENSG00000173531	87.4906	189.2	-1.11189	0.000283505	0.00264569	MST1
ENSG00000135540	264.941	573.138	-1.11298	0.000939901	0.00706885	NHSL1
ENSG00000133935	504.251	1090.98	-1.11326	5.29785e-14	6.40911e-12	ERG28
ENSG00000198624	179.618	389.973	-1.11844	0.000436212	0.00379415	CCDC69
ENSG00000105519	74.614	162.898	-1.12478	1.81017e-05	0.000262335	CAPS
ENSG00000140398	57.6471	125.708	-1.12573	3.80259e-06	6.97093e-05	NEIL1
ENSG00000160999	22.971	50.6043	-1.12688	6.09617e-05	0.000723807	SH2B2
ENSG00000135749	460.349	1005.33	-1.12775	1.52794e-18	3.4061e-16	PCNX2
ENSG00000106571	460.764	1008.22	-1.12906	1.07088e-09	5.5042e-08	GLI3
ENSG00000278962	31.8389	69.9494	-1.12976	0.000123106	0.00130928	AC092645.1
ENSG00000168477	18666.3	40867.5	-1.13051	0.000268227	0.00252809	TNXB
ENSG00000214176	200.752	439.945	-1.1311	4.74403e-06	8.3738e-05	PLEKHM1P1
ENSG00000166347	293.493	643.291	-1.13189	1.24542e-12	1.18794e-10	CYB5A
ENSG00000013619	303.676	667.092	-1.13526	0.000472184	0.00405547	MAMLD1
ENSG00000001630	168.563	370.532	-1.13664	2.98768e-07	7.72824e-06	CYP51A1
ENSG00000011638	457.408	1006.14	-1.13737	1.06932e-13	1.24066e-11	TMEM159
ENSG00000161010	192.49	423.872	-1.13766	6.18084e-05	0.000732982	MRNIP
ENSG00000146859	238.665	525.566	-1.13795	5.80793e-09	2.39065e-07	TMEM140
ENSG00000104870	748.587	1648.11	-1.1385	9.21222e-08	2.76088e-06	FCGRT
ENSG00000166289	227.878	504.426	-1.14587	4.86652e-09	2.06749e-07	PLEKHF1
ENSG00000196782	48.8996	108.234	-1.14781	5.18528e-07	1.24329e-05	MAML3
ENSG00000109099	1950.62	4325.73	-1.14896	1.96449e-07	5.31725e-06	PMP22
ENSG00000107551	80.0198	177.585	-1.14947	0.00018301	0.00183287	RASSF4
ENSG00000204311	33.3867	74.5436	-1.15402	4.92317e-05	0.000604604	PJVK
ENSG00000110881	135.885	302.919	-1.15543	5.47579e-05	0.000658822	ASIC1
ENSG00000139508	101.656	226.355	-1.15603	0.000157314	0.00161214	SLC46A3
ENSG00000163931	3800.04	8473.18	-1.15685	2.10406e-13	2.31914e-11	TKT
ENSG00000011021	422.673	945.971	-1.1607	4.14233e-19	1.0403e-16	CLCN6
ENSG00000164220	188.352	421.694	-1.16114	0.000922105	0.00696405	F2RL2
ENSG00000187098	186.959	418.524	-1.16191	2.73039e-05	0.000371798	MITF
ENSG00000144712	24.9387	55.6839	-1.1626	0.00139919	0.00976352	CAND2
ENSG00000269896	13.7936	30.9421	-1.16318	0.000220106	0.0021459	AL513477.1
ENSG00000105655	184.871	414.411	-1.16388	7.30528e-06	0.000122516	ISYNA1
ENSG00000071967	10182.7	22817.3	-1.164	3.01854e-09	1.37043e-07	CYBRD1
ENSG00000141401	156.795	351.893	-1.16754	1.60205e-09	7.80949e-08	IMPA2
ENSG00000139567	896.688	2016.84	-1.16922	1.00491e-05	0.000160785	ACVRL1
ENSG00000076258	31.6389	71.3521	-1.17152	0.000276282	0.00259292	FMO4
ENSG00000119943	206.76	466.114	-1.17178	8.40422e-17	1.52972e-14	PYROXD2
ENSG00000261888	334.307	753.904	-1.17287	0.000414196	0.00363505	AC144831.1
ENSG00000158555	353.433	799.625	-1.17752	7.06017e-05	0.000817234	GDPD5
ENSG00000154134	173.777	393.449	-1.17825	3.52369e-06	6.56431e-05	ROBO3
ENSG00000013297	5124.04	11601.4	-1.17893	8.91144e-05	0.000992718	CLDN11
ENSG00000099377	262.441	594.725	-1.18037	1.0403e-06	2.26809e-05	HSD3B7
ENSG00000119862	76.9581	174.311	-1.18096	0.000246212	0.00235869	LGALSL
ENSG00000196972	18.439	41.571	-1.18252	1.03634e-05	0.000164751	SMIM10L2B
ENSG00000277778	9.61909	21.6126	-1.18335	0.000947116	0.00710964	PGM5P2
ENSG00000159403	4048.21	9207.25	-1.18547	4.62018e-05	0.000575781	C1R
ENSG00000143819	1146.92	2615.83	-1.18937	1.11517e-13	1.28633e-11	EPHX1
ENSG00000185950	843.047	1923.1	-1.18955	1.37896e-11	1.07288e-09	IRS2
ENSG00000130164	3119.46	7115.16	-1.18964	5.88768e-28	3.07399e-25	LDLR
ENSG00000174080	1403.19	3201.44	-1.19013	1.82244e-05	0.000263501	CTSF
ENSG00000090006	368.699	842.543	-1.1925	0.00104633	0.00768293	LTBP4
ENSG00000165633	799.436	1830.96	-1.19552	1.16519e-10	7.65478e-09	VSTM4
ENSG00000198939	12.3334	28.3344	-1.19853	0.00110578	0.00803911	ZFP2
ENSG00000178026	92.852	213.661	-1.19869	6.33145e-10	3.44153e-08	LRRC75B
ENSG00000197321	1159.61	2662.1	-1.19871	4.64505e-08	1.52579e-06	SVIL
ENSG00000204991	49.922	114.431	-1.2027	1.22649e-10	7.92621e-09	SPIRE2
ENSG00000206417	20.2893	47.326	-1.20921	0.000766584	0.00599253	H1FX-AS1
ENSG00000137752	46.9172	108.549	-1.2104	0.000536947	0.00449935	CASP1
ENSG00000153064	30.2593	69.9562	-1.21259	7.0155e-07	1.61658e-05	BANK1
ENSG00000269044	43.6735	101.746	-1.2173	6.96592e-06	0.00011752	AC024075.2
ENSG00000144283	976.71	2277.9	-1.22174	1.24942e-05	0.000192458	PKP4
ENSG00000160712	70.5857	165.147	-1.22267	1.48518e-10	9.44424e-09	IL6R
ENSG00000135929	90.6484	211.547	-1.22307	0.00125915	0.00894751	CYP27A1
ENSG00000125454	33.5605	78.3173	-1.22587	1.24768e-07	3.61639e-06	SLC25A19
ENSG00000269427	25.8827	60.7443	-1.22649	6.83764e-05	0.000797056	AC024075.3
ENSG00000160211	2580.75	6041.35	-1.2271	7.54621e-09	3.01241e-07	G6PD
ENSG00000155085	40.0183	94.01	-1.22729	4.86617e-07	1.17594e-05	AK9
ENSG00000205269	80.0401	187.178	-1.22739	1.31075e-07	3.76343e-06	TMEM170B
ENSG00000167996	18708.1	43860.7	-1.22927	0.000281276	0.00262736	FTH1
ENSG00000145949	18.7471	43.9971	-1.23099	5.2031e-05	0.000632534	MYLK4
ENSG00000285793	35.3452	83.3899	-1.2378	0.000601691	0.00491055	AC125232.2
ENSG00000179532	117.318	277.281	-1.23982	8.65824e-08	2.62259e-06	DNHD1
ENSG00000115504	1640.1	3874.32	-1.24014	8.26172e-08	2.52173e-06	EHBP1
ENSG00000219507	43.7549	103.416	-1.24221	5.88558e-06	0.000101627	FTH1P8
ENSG00000172250	11.1525	26.3087	-1.24224	0.00076507	0.00598541	SERHL
ENSG00000175938	286.37	677.64	-1.24316	1.22018e-11	9.72223e-10	ORAI3
ENSG00000196208	11.034	26.2217	-1.24708	0.00115367	0.00832019	GREB1
ENSG00000131242	21.5657	51.3291	-1.24769	0.00122318	0.00874456	RAB11FIP4
ENSG00000248508	21.4769	51.2433	-1.24967	2.66668e-05	0.000364417	SRP14-AS1
ENSG00000272221	22.0059	52.2067	-1.25098	0.000384295	0.00343133	AL645933.2
ENSG00000171962	19.2151	45.8417	-1.251	7.77728e-07	1.76344e-05	DRC3
ENSG00000143554	251.505	599	-1.25121	4.51305e-05	0.000565628	SLC27A3
ENSG00000116883	26.0055	62.0424	-1.25201	4.59549e-07	1.12422e-05	AL591845.1
ENSG00000137767	156.459	373.395	-1.25482	1.5126e-06	3.15894e-05	SQOR
ENSG00000131016	3451.56	8240.94	-1.2555	0.000131586	0.00138303	AKAP12
ENSG00000223891	58.3257	139.331	-1.25796	1.34067e-05	0.000204293	OSER1-DT
ENSG00000283828	13.5957	32.567	-1.258	9.86497e-05	0.00108313	AL137002.2
ENSG00000164050	681.886	1631.77	-1.2586	1.51578e-08	5.64224e-07	PLXNB1
ENSG00000163644	203.955	487.555	-1.25965	1.51039e-15	2.39728e-13	PPM1K
ENSG00000188732	9.74414	23.1822	-1.26151	0.00108877	0.00793772	FAM221A
ENSG00000127863	169.018	405.605	-1.26263	8.17132e-09	3.22946e-07	TNFRSF19
ENSG00000185561	328.589	788.627	-1.26305	1.25009e-08	4.71516e-07	TLCD2
ENSG00000277476	19.9803	48.2749	-1.26669	1.04369e-05	0.000165788	AC005332.5
ENSG00000102796	19.6662	47.3129	-1.26793	0.000197235	0.00195267	DHRS12
ENSG00000165072	107.464	259.226	-1.26973	0.00137468	0.00961692	MAMDC2
ENSG00000047648	138.317	334.445	-1.27247	3.54528e-05	0.00046428	ARHGAP6
ENSG00000167799	40.3939	97.4475	-1.27449	2.51209e-10	1.48776e-08	NUDT8
ENSG00000204839	36.819	89.4513	-1.27596	9.05157e-06	0.000147079	MROH6
ENSG00000259658	11.7069	28.6154	-1.27681	0.000328802	0.00301035	AC027559.1
ENSG00000184068	14.6399	35.7472	-1.28456	0.000684289	0.00544795	SREBF2-AS1
ENSG00000162066	198.717	484.466	-1.28561	3.00621e-06	5.71842e-05	AMDHD2
ENSG00000184271	88.5372	216.361	-1.28602	1.96243e-09	9.35929e-08	POU6F1
ENSG00000255031	20.9126	51.1933	-1.28651	2.71739e-05	0.000370791	AP002807.1
ENSG00000167705	72.4123	177.056	-1.28664	8.58755e-09	3.36714e-07	RILP
ENSG00000099866	13.4568	32.9074	-1.28962	0.000427523	0.00373166	MADCAM1
ENSG00000273576	12.8637	31.3482	-1.28994	5.29919e-05	0.000643033	AC009283.1
ENSG00000050628	169.857	416.362	-1.29275	8.50097e-08	2.5868e-06	PTGER3
ENSG00000124406	9.16273	22.2081	-1.29361	0.00134296	0.00943165	ATP8A1
ENSG00000166839	100.536	246.728	-1.29513	7.57398e-05	0.000865099	ANKDD1A
ENSG00000104549	1497.62	3678.7	-1.2966	2.56473e-19	6.70843e-17	SQLE
ENSG00000272899	15.4829	37.8436	-1.2978	0.000385947	0.00344235	ATP6V1FNB
ENSG00000185432	332.922	818.965	-1.29839	0.000411109	0.00361542	METTL7A
ENSG00000137101	17.1558	42.325	-1.30082	0.000298094	0.00276623	CD72
ENSG00000178665	10.932	26.8304	-1.30171	0.000798036	0.00618961	ZNF713
ENSG00000159023	86.8538	213.908	-1.30226	0.00103114	0.00759667	EPB41
ENSG00000196155	910.976	2250.6	-1.30455	1.26227e-07	3.64532e-06	PLEKHG4
ENSG00000182685	32.9425	81.5794	-1.30556	0.000307464	0.00283989	BRICD5
ENSG00000091536	18.2871	45.5845	-1.30629	0.00117477	0.00844167	MYO15A
ENSG00000105499	52.4902	129.65	-1.30925	0.00013965	0.00145365	PLA2G4C
ENSG00000137727	287.714	713.129	-1.30953	2.8716e-06	5.50992e-05	ARHGAP20
ENSG00000151012	1390.37	3453.01	-1.31239	2.23061e-05	0.000312538	SLC7A11
ENSG00000170624	673.519	1678.68	-1.31777	3.01007e-06	5.72028e-05	SGCD
ENSG00000164070	192.384	479.917	-1.31842	1.34213e-06	2.85401e-05	HSPA4L
ENSG00000161642	112.678	281.652	-1.31971	3.92269e-05	0.000502753	ZNF385A
ENSG00000143412	24.154	60.3244	-1.32131	0.000623024	0.00504624	ANXA9
ENSG00000105327	256.681	641.818	-1.32272	2.31865e-10	1.39824e-08	BBC3
ENSG00000109107	114.721	287.411	-1.32686	2.53275e-09	1.19075e-07	ALDOC
ENSG00000188060	33.2188	83.3179	-1.32747	0.00052118	0.00440504	RAB42
ENSG00000141404	12.1291	30.6874	-1.32947	8.67315e-06	0.000141742	GNAL
ENSG00000069493	19.6914	49.8445	-1.33116	7.88125e-06	0.000130521	CLEC2D
ENSG00000182326	8549.62	21552.1	-1.33389	2.05111e-06	4.11883e-05	C1S
ENSG00000104856	80.5273	203.036	-1.33448	3.82979e-06	6.9966e-05	RELB
ENSG00000131730	9.65156	24.3834	-1.33741	0.000198034	0.0019596	CKMT2
ENSG00000025434	60.6889	153.392	-1.33883	0.000234722	0.00227166	NR1H3
ENSG00000147155	251.692	640.55	-1.34768	3.37368e-11	2.34035e-09	EBP
ENSG00000232187	63.1102	160.752	-1.34924	4.16993e-05	0.000531351	FTH1P7
ENSG00000135437	32.9638	84.2762	-1.35351	1.70573e-06	3.50692e-05	RDH5
ENSG00000073060	383.492	981.578	-1.35566	4.50671e-19	1.11313e-16	SCARB1
ENSG00000164938	545.861	1401.42	-1.36008	2.33706e-10	1.40023e-08	TP53INP1
ENSG00000262001	24.3934	62.8232	-1.3619	7.05728e-07	1.62432e-05	DLGAP1-AS2
ENSG00000126785	596.327	1533.99	-1.36336	3.29067e-11	2.29077e-09	RHOJ
ENSG00000273230	58.2884	149.893	-1.36406	6.09375e-17	1.11944e-14	AC102953.2
ENSG00000099953	105.397	271.574	-1.36575	9.01976e-07	2.00844e-05	MMP11
ENSG00000176658	3725.59	9605.83	-1.36644	7.62868e-14	9.06305e-12	MYO1D
ENSG00000104894	9.1916	23.5882	-1.36783	0.00116561	0.00839104	CD37
ENSG00000135951	13.1267	34.2165	-1.37018	0.000581163	0.00477444	TSGA10
ENSG00000185813	917.065	2371.57	-1.37064	8.13379e-31	5.97683e-28	PCYT2
ENSG00000115257	22.6539	59.0893	-1.37108	3.72779e-05	0.000483395	PCSK4
ENSG00000092969	44.4299	114.799	-1.37374	0.000511897	0.00434204	TGFB2
ENSG00000242960	35.347	91.6897	-1.37474	3.7077e-06	6.82381e-05	FTH1P23
ENSG00000267414	6.15233	16.0817	-1.37657	0.000855357	0.00654465	AC120049.1
ENSG00000113721	7872.62	20519	-1.38204	5.67561e-13	5.83441e-11	PDGFRB
ENSG00000168646	62.2285	162.674	-1.38561	3.08944e-09	1.39306e-07	AXIN2
ENSG00000196358	75.0704	196.327	-1.38829	9.33899e-08	2.79045e-06	NTNG2
ENSG00000188906	164.465	430.497	-1.38838	3.94692e-09	1.7135e-07	LRRK2
ENSG00000231768	14.1667	37.2809	-1.39148	1.4888e-06	3.11579e-05	LINC01354
ENSG00000113161	1153.02	3025.11	-1.39162	1.23032e-26	5.8118e-24	HMGCR
ENSG00000116117	399.053	1049.01	-1.3941	1.61694e-05	0.000238869	PARD3B
ENSG00000168952	88.5512	232.994	-1.39604	1.25258e-05	0.000192645	STXBP6
ENSG00000166592	16.0147	42.2204	-1.39741	3.63216e-05	0.000473781	RRAD
ENSG00000136048	1402.31	3695.56	-1.39803	3.40345e-07	8.71283e-06	DRAM1
ENSG00000074660	13.0621	34.5278	-1.40133	2.90499e-05	0.000391276	SCARF1
ENSG00000153291	49.3666	130.522	-1.40298	0.00028559	0.00266264	SLC25A27
ENSG00000163624	17.844	47.2163	-1.40839	0.000768948	0.00600126	CDS1
ENSG00000110921	278.262	741.733	-1.41385	3.51699e-29	2.05227e-26	MVK
ENSG00000172594	274.664	732.773	-1.41496	3.81975e-14	4.76628e-12	SMPDL3A
ENSG00000196139	454.554	1213.05	-1.41633	7.51087e-06	0.000125329	AKR1C3
ENSG00000235865	28.4426	76.0704	-1.41691	4.61059e-05	0.000575356	GSN-AS1
ENSG00000204131	118.698	317.683	-1.41935	0.000383245	0.00342658	NHSL2
ENSG00000233593	8.41799	22.5872	-1.42256	6.71235e-05	0.000784755	AL590094.1
ENSG00000143772	93.036	249.621	-1.4246	2.72915e-09	1.2563e-07	ITPKB
ENSG00000136732	370.35	997.959	-1.43087	3.65626e-23	1.395e-20	GYPC
ENSG00000164056	139.456	377.307	-1.43437	1.62111e-08	6.00365e-07	SPRY1
ENSG00000064687	161.102	435.093	-1.43455	1.52017e-07	4.2539e-06	ABCA7
ENSG00000172824	56.9931	154.542	-1.43677	0.00034456	0.00312578	CES4A
ENSG00000273117	31.1505	84.3597	-1.43764	4.8607e-08	1.58612e-06	AC144652.1
ENSG00000234975	63.542	172.172	-1.43859	7.42548e-07	1.69725e-05	FTH1P2
ENSG00000184922	52.8449	143.559	-1.44053	0.000104815	0.0011376	FMNL1
ENSG00000050730	11.5125	31.1659	-1.44123	7.12292e-05	0.000823536	TNIP3
ENSG00000100197	7.75171	21.1724	-1.44398	0.00132689	0.00934522	CYP2D6
ENSG00000170873	95.5511	260.372	-1.44565	0.000992985	0.00737031	MTSS1
ENSG00000176974	156.943	427.577	-1.44679	9.06352e-07	2.01592e-05	SHMT1
ENSG00000213901	10.6682	29.1301	-1.45053	2.2559e-05	0.000315636	SLC23A3
ENSG00000273179	20.4959	56.3108	-1.45537	0.000567958	0.00468926	AC092535.4
ENSG00000261534	37.979	104.025	-1.45841	1.1784e-09	6.00115e-08	AL596244.1
ENSG00000258311	15.7853	43.4394	-1.45947	8.41291e-05	0.000944607	BLOC1S1-RDH5
ENSG00000162572	56.9837	156.969	-1.46131	3.59186e-09	1.57719e-07	SCNN1D
ENSG00000188042	489.188	1348.81	-1.46327	1.65644e-05	0.000243256	ARL4C
ENSG00000146592	141.003	389.5	-1.46615	9.26203e-06	0.000150007	CREB5
ENSG00000273148	4.84022	13.3881	-1.47015	0.00140871	0.00981001	AL035563.1
ENSG00000125648	540.737	1498.91	-1.47063	1.57724e-16	2.7316e-14	SLC25A23
ENSG00000188211	155.718	431.477	-1.47068	1.96079e-07	5.31448e-06	NCR3LG1
ENSG00000166482	1500.45	4167.97	-1.47394	1.68246e-08	6.13602e-07	MFAP4
ENSG00000008517	28.5348	79.7338	-1.48058	0.000210499	0.00205931	IL32
ENSG00000240038	21.2271	59.5317	-1.4864	9.0253e-05	0.00100484	AMY2B
ENSG00000107611	72.1043	204.217	-1.50114	0.00014699	0.00151811	CUBN
ENSG00000285816	15.2954	43.3238	-1.50167	0.000190686	0.00189445	AP000944.2
ENSG00000203797	12.6465	35.754	-1.50183	0.000124918	0.00132462	DDO
ENSG00000165124	3971.01	11264	-1.50412	3.28732e-05	0.000435093	SVEP1
ENSG00000174348	1470.79	4173.53	-1.50458	0.000875777	0.00667259	PODN
ENSG00000279267	20.7473	58.8168	-1.50595	1.6638e-08	6.10163e-07	AL078621.3
ENSG00000161835	48.3622	137.533	-1.5079	0.000566133	0.00467809	GRASP
ENSG00000170271	223.576	636.725	-1.50923	2.57736e-07	6.78182e-06	FAXDC2
ENSG00000260912	12.6099	35.9376	-1.51033	0.000406657	0.003589	AL158206.1
ENSG00000075826	71.4174	203.658	-1.51237	1.64719e-07	4.55792e-06	SEC31B
ENSG00000235501	42.6855	122.401	-1.51481	5.88142e-13	5.98397e-11	AC105942.1
ENSG00000253878	11.8853	33.8794	-1.51576	1.27285e-06	2.72342e-05	AC087752.3
ENSG00000145390	2244.71	6425.14	-1.51719	2.36462e-20	6.89914e-18	USP53
ENSG00000112182	13.8956	40.0258	-1.53742	3.21319e-06	6.0714e-05	BACH2
ENSG00000176438	930.254	2701.75	-1.53798	1.6e-12	1.46963e-10	SYNE3
ENSG00000184916	14.2194	41.4157	-1.54156	0.00010033	0.00109793	JAG2
ENSG00000153237	15.3214	44.7412	-1.54485	2.61672e-05	0.00035903	CCDC148
ENSG00000092929	13.6368	40.0527	-1.54604	2.88731e-05	0.000389159	UNC13D
ENSG00000181097	10.0937	29.4286	-1.55226	5.31831e-05	0.000644172	BREA2
ENSG00000067064	1055.07	3095.7	-1.553	2.58491e-26	1.19267e-23	IDI1
ENSG00000186409	18.7574	55.1547	-1.55645	1.89693e-05	0.000272126	CCDC30
ENSG00000142657	1968.12	5801.28	-1.55961	5.14675e-08	1.66726e-06	PGD
ENSG00000149090	1704.12	5023.47	-1.55966	0.00131187	0.00925587	PAMR1
ENSG00000166578	8.07428	24.1159	-1.56375	4.2764e-05	0.000542133	IQCD
ENSG00000188385	22.0181	65.2124	-1.56449	5.71465e-05	0.000682593	JAKMIP3
ENSG00000089060	543.245	1608.45	-1.56571	5.87011e-13	5.98397e-11	SLC8B1
ENSG00000152217	111.436	330.103	-1.56732	1.06015e-09	5.47746e-08	SETBP1
ENSG00000163590	43.1725	128.505	-1.57161	2.27866e-08	8.07296e-07	PPM1L
ENSG00000154262	540.23	1608.41	-1.57387	4.7302e-06	8.35683e-05	ABCA6
ENSG00000126016	114.595	341.718	-1.57741	3.56929e-10	2.04077e-08	AMOT
ENSG00000277147	8.39067	24.7835	-1.57829	0.00113188	0.00818687	LINC00869
ENSG00000205795	59.135	176.88	-1.58001	4.47192e-11	3.03846e-09	CYS1
ENSG00000244617	7.93863	23.5466	-1.58015	7.75001e-05	0.000882158	ASPRV1
ENSG00000203709	17.3556	52.2909	-1.58693	0.000713425	0.00563469	MIR29B2CHG
ENSG00000232611	5.46666	16.5563	-1.60413	0.00103384	0.00760526	AL683813.1
ENSG00000157510	71.8216	218.652	-1.60445	3.19026e-05	0.000424797	AFAP1L1
ENSG00000099840	23.0421	70.2988	-1.60605	1.3847e-07	3.93587e-06	IZUMO4
ENSG00000184381	83.3613	254.755	-1.60957	4.64673e-11	3.14646e-09	PLA2G6
ENSG00000136717	744.152	2273.56	-1.61136	2.97114e-09	1.35201e-07	BIN1
ENSG00000108381	95.8299	293.603	-1.61362	0.000253608	0.00241787	ASPA
ENSG00000159640	333.554	1022.82	-1.61608	1.03059e-06	2.25187e-05	ACE
ENSG00000157873	253.671	784.518	-1.62857	4.28084e-08	1.42855e-06	TNFRSF14
ENSG00000255389	9.36188	28.7558	-1.62982	0.000301323	0.00278836	Z97989.1
ENSG00000072310	1649.91	5109.95	-1.63082	9.12614e-97	6.03542e-93	SREBF1
ENSG00000115267	38.5922	119.696	-1.63438	6.08284e-06	0.000104398	IFIH1
ENSG00000260855	10.7177	33.4145	-1.63627	3.07575e-06	5.83393e-05	AL591848.4
ENSG00000101265	205.455	639.001	-1.63666	0.000469966	0.00404041	RASSF2
ENSG00000108984	11.3074	35.2055	-1.63929	0.00013397	0.0014004	MAP2K6
ENSG00000052802	2237.47	6986.04	-1.64263	4.86361e-17	9.1032e-15	MSMO1
ENSG00000128573	16.4318	51.4229	-1.64604	0.000397735	0.00353384	FOXP2
ENSG00000279833	10.9877	34.4986	-1.64712	2.2763e-05	0.000317818	AL031846.2
ENSG00000248161	11.5826	36.4646	-1.64969	7.50548e-07	1.71356e-05	AC098487.1
ENSG00000165795	5.0472	15.7328	-1.64983	0.000531028	0.00446613	NDRG2
ENSG00000132481	113.537	357.853	-1.65413	7.87723e-10	4.20119e-08	TRIM47
ENSG00000114698	660.682	2086.24	-1.65907	4.57503e-19	1.11313e-16	PLSCR4
ENSG00000197635	1681.64	5315.63	-1.66038	9.22869e-05	0.00102346	DPP4
ENSG00000141854	7.62219	24.0243	-1.66062	4.30778e-05	0.000544106	MISP3
ENSG00000132196	84.6387	268.136	-1.66131	2.12603e-22	7.53224e-20	HSD17B7
ENSG00000136859	1644.97	5209.5	-1.66308	2.51172e-05	0.00034606	ANGPTL2
ENSG00000167191	665.747	2110.17	-1.66397	3.13974e-07	8.06897e-06	GPRC5B
ENSG00000109794	81.4418	258.812	-1.66631	1.65585e-18	3.65023e-16	FAM149A
ENSG00000100100	454.994	1450.51	-1.67258	9.73734e-19	2.27281e-16	PIK3IP1
ENSG00000153094	51.3468	164.118	-1.67438	1.53923e-05	0.000229957	BCL2L11
ENSG00000145819	233.258	745.023	-1.67559	4.96364e-10	2.7508e-08	ARHGAP26
ENSG00000184702	4.63045	14.8195	-1.67795	0.000498663	0.00424612	2005-09-01
ENSG00000197872	14.1218	45.4802	-1.68067	1.74876e-07	4.78179e-06	FAM49A
ENSG00000138821	228.847	734.679	-1.68255	1.75057e-08	6.31477e-07	SLC39A8
ENSG00000016402	42.0054	134.706	-1.68262	2.13668e-06	4.26905e-05	IL20RA
ENSG00000139597	30.6587	98.4788	-1.68269	1.20347e-07	3.5113e-06	N4BP2L1
ENSG00000167306	5.35162	17.2864	-1.6832	0.00109807	0.00800066	MYO5B
ENSG00000274712	11.9759	38.6325	-1.68564	1.74792e-08	6.31477e-07	AC005332.4
ENSG00000105479	5.77353	18.4527	-1.69485	0.000989245	0.00735355	CCDC114
ENSG00000133056	67.6153	219.809	-1.70047	2.25679e-12	2.026e-10	PIK3C2B
ENSG00000153446	5.34467	17.2575	-1.70461	0.000932783	0.00702864	C16orf89
ENSG00000262691	23.707	77.7755	-1.70731	7.0121e-09	2.82191e-07	AC040160.1
ENSG00000267390	5.75177	18.6256	-1.70853	0.00070869	0.00560176	AC036176.1
ENSG00000137486	124.584	407.45	-1.7099	9.54918e-10	4.99883e-08	ARRB1
ENSG00000185339	170.785	559.042	-1.71035	1.02871e-15	1.64594e-13	TCN2
ENSG00000106823	289.028	946.073	-1.71067	8.32061e-05	0.000936363	ECM2
ENSG00000172893	1380.75	4519.92	-1.71091	6.34963e-16	1.03259e-13	DHCR7
ENSG00000238105	6.00084	19.7688	-1.71838	0.000127665	0.00134727	GOLGA2P5
ENSG00000164236	386.304	1276.47	-1.72419	2.87916e-05	0.000388325	ANKRD33B
ENSG00000177076	14.7544	48.7245	-1.72669	3.72604e-07	9.39322e-06	ACER2
ENSG00000185565	94.3311	313.317	-1.7323	3.90776e-05	0.00050144	LSAMP
ENSG00000167371	35.3347	117.861	-1.73457	1.38917e-07	3.94292e-06	PRRT2
ENSG00000204228	13.7727	45.8766	-1.73542	7.41982e-08	2.29298e-06	HSD17B8
ENSG00000106819	146.626	491.212	-1.74453	0.000202836	0.00199715	ASPN
ENSG00000162630	75.1687	251.943	-1.74489	9.37068e-05	0.00103805	B3GALT2
ENSG00000133321	30.9244	104.058	-1.74921	2.19744e-05	0.000308923	RARRES3
ENSG00000258461	7.62337	25.9968	-1.75071	4.29251e-05	0.000542787	AC012651.1
ENSG00000266405	5.85457	19.7698	-1.76139	0.00011882	0.00126673	CBX3P2
ENSG00000187479	70.068	237.82	-1.76429	4.81257e-17	9.1032e-15	C11orf96
ENSG00000186480	2809.82	9561.26	-1.76685	9.67502e-34	9.14059e-31	INSIG1
ENSG00000109084	257.749	877.58	-1.7671	4.26496e-08	1.42693e-06	TMEM97
ENSG00000139428	234.63	800.448	-1.77109	5.73038e-42	8.74544e-39	MMAB
ENSG00000115525	270.35	929.253	-1.78175	7.57386e-10	4.06122e-08	ST3GAL5
ENSG00000223901	16.5302	57.2591	-1.78314	1.94406e-05	0.000277482	AP001469.1
ENSG00000265298	23.3341	80.662	-1.78611	4.52809e-10	2.53063e-08	AC132812.1
ENSG00000085117	71.9518	247.983	-1.78659	2.92889e-07	7.60591e-06	CD82
ENSG00000155749	5.67217	19.8007	-1.78951	0.00142453	0.00990285	ALS2CR12
ENSG00000137261	4.98198	16.9748	-1.79218	0.000534442	0.00448731	KIAA0319
ENSG00000102003	5.61739	19.554	-1.80011	0.000132578	0.00139025	SYP
ENSG00000156042	17.1383	59.7564	-1.80257	2.62414e-06	5.10922e-05	CFAP70
ENSG00000275395	4.95602	17.4452	-1.80369	0.000516222	0.00437312	FCGBP
ENSG00000225511	11.3271	39.6873	-1.80511	0.000366005	0.00329023	LINC00475
ENSG00000167536	10.6676	37.2016	-1.81533	2.93027e-06	5.60083e-05	DHRS13
ENSG00000260306	5.27918	18.5812	-1.81838	0.000577968	0.00475763	AC092375.2
ENSG00000116819	4.15534	14.7673	-1.82102	0.000279158	0.00261496	TFAP2E
ENSG00000180155	911.846	3223.55	-1.8218	6.42032e-09	2.59428e-07	LYNX1
ENSG00000197971	700.586	2480	-1.82381	1.23133e-38	1.43703e-35	MBP
ENSG00000272316	26.4088	93.2075	-1.82477	2.80193e-09	1.28491e-07	AL021368.2
ENSG00000213366	157.3	557.595	-1.82518	1.61633e-11	1.21932e-09	GSTM2
ENSG00000136235	3064.52	10906	-1.83137	1.34449e-14	1.83963e-12	GPNMB
ENSG00000120278	16.3207	58.0449	-1.83206	0.000815831	0.00630054	PLEKHG1
ENSG00000130518	47.9394	171.546	-1.83433	1.95845e-09	9.35929e-08	IQCN
ENSG00000125730	370.084	1327.72	-1.84298	2.57416e-05	0.000353435	C3
ENSG00000185567	3198.56	11488.4	-1.84465	1.81185e-10	1.13757e-08	AHNAK2
ENSG00000141527	5.00528	18.0634	-1.84932	4.13606e-05	0.000528053	CARD14
ENSG00000158528	4.8214	17.3351	-1.85092	4.1431e-05	0.000528612	PPP1R9A
ENSG00000089041	14.394	52.1741	-1.8572	0.000596415	0.00487551	P2RX7
ENSG00000266714	32.2941	117.372	-1.85979	1.81896e-07	4.95035e-06	MYO15B
ENSG00000261625	16.2254	59.4061	-1.86436	3.3351e-05	0.000440242	AP003071.4
ENSG00000183773	3.97836	14.6236	-1.86854	0.000722803	0.00570422	AIFM3
ENSG00000259673	50.5205	184.99	-1.87104	2.22384e-08	7.90699e-07	IQCH-AS1
ENSG00000116133	1831.58	6776.93	-1.88747	3.45089e-22	1.20115e-19	DHCR24
ENSG00000120437	444.56	1646.94	-1.88935	1.58395e-20	4.83471e-18	ACAT2
ENSG00000134324	1030.66	3819.22	-1.88962	3.1138e-29	1.87205e-26	LPIN1
ENSG00000055732	3.4756	12.7543	-1.89041	0.00140839	0.00981001	MCOLN3
ENSG00000185669	15.4015	57.8233	-1.89071	5.15251e-09	2.1658e-07	SNAI3
ENSG00000215769	10.6013	39.365	-1.89131	2.20546e-07	5.88389e-06	ARHGAP27P1-BPTFP1-KPNA2P3
ENSG00000236901	3.67204	13.5205	-1.89347	0.00116822	0.00840674	MIR600HG
ENSG00000166793	19.7014	73.2668	-1.89531	0.00010331	0.00112373	YPEL4
ENSG00000087076	88.9842	335.222	-1.91177	2.09055e-07	5.62776e-06	HSD17B14
ENSG00000154258	803.908	3054.65	-1.9259	6.86903e-07	1.58836e-05	ABCA9
ENSG00000198915	7.24754	27.702	-1.93896	1.9192e-05	0.000274329	RASGEF1A
ENSG00000271133	5.98942	23.0426	-1.94161	3.89438e-05	0.000500418	AC004130.1
ENSG00000112972	1098.06	4225.51	-1.94412	3.12513e-31	2.38471e-28	HMGCS1
ENSG00000145911	12.5529	48.578	-1.94621	4.06792e-07	1.01011e-05	N4BP3
ENSG00000163884	60.3181	232.697	-1.94875	2.09396e-06	4.19638e-05	KLF15
ENSG00000254192	12.7283	49.6938	-1.9589	0.000244063	0.00233923	AC011365.2
ENSG00000116032	7.75291	30.3498	-1.95912	2.71869e-06	5.26746e-05	GRIN3B
ENSG00000182957	69.3123	270.259	-1.96004	8.80775e-08	2.65975e-06	SPATA13
ENSG00000048740	454.732	1770.05	-1.96067	9.29201e-20	2.63362e-17	CELF2
ENSG00000279196	8.84254	34.4667	-1.9621	1.79007e-05	0.000259613	AC135048.4
ENSG00000025039	49.2845	192.533	-1.96334	7.80232e-19	1.84283e-16	RRAGD
ENSG00000223802	4.68508	18.5387	-1.96537	0.000538752	0.00451196	CERS1
ENSG00000144485	12.5417	49.1698	-1.97104	4.90197e-07	1.18171e-05	HES6
ENSG00000157601	30.3808	119.686	-1.97928	0.000102331	0.00111675	MX1
ENSG00000169710	5992.56	23681.2	-1.9825	1.34986e-18	3.04333e-16	FASN
ENSG00000076344	38.257	151.604	-1.98289	1.79757e-14	2.39354e-12	RGS11
ENSG00000100344	54.3679	214.945	-1.98516	1.82277e-06	3.71672e-05	PNPLA3
ENSG00000063180	8.78723	34.5762	-1.9901	1.42231e-06	2.9941e-05	CA11
ENSG00000260285	29.8874	119.93	-1.99481	2.04936e-10	1.2588e-08	AL133367.1
ENSG00000237356	2.98963	11.9793	-1.99535	0.000179723	0.00180359	AL365295.1
ENSG00000170153	102.764	410.01	-1.99714	9.42945e-07	2.0833e-05	RNF150
ENSG00000239415	7.02276	28.1028	-1.99825	5.50137e-06	9.54918e-05	AP001469.3
ENSG00000016391	17.4246	69.8606	-1.9996	0.000605346	0.00493227	CHDH
ENSG00000151892	705.606	2822.61	-1.99993	1.26772e-08	4.76354e-07	GFRA1
ENSG00000238120	3.11918	12.7318	-2.00446	0.000408546	0.00359896	LINC01589
ENSG00000106976	263.976	1069.2	-2.01763	1.39478e-06	2.94387e-05	DNM1
ENSG00000171502	10.4225	42.0479	-2.02435	1.58975e-07	4.41128e-06	COL24A1
ENSG00000139910	14.529	59.0337	-2.03323	4.31598e-05	0.000544368	NOVA1
ENSG00000171791	42.7151	175.698	-2.03815	3.30401e-06	6.21931e-05	BCL2
ENSG00000175287	36.8614	151.705	-2.03888	0.000834691	0.00642002	PHYHD1
ENSG00000152154	7.58595	31.2557	-2.03925	2.44164e-06	4.80101e-05	TMEM178A
ENSG00000260196	22.5595	93.0428	-2.04669	1.46298e-12	1.35634e-10	AC124798.1
ENSG00000231749	6.46523	26.8574	-2.05371	0.000279453	0.00261607	ABCA9-AS1
ENSG00000160282	9.73416	40.7355	-2.06188	0.000182982	0.00183287	FTCD
ENSG00000226450	2.19398	9.19466	-2.06255	0.00128609	0.00911283	CYP2D8P
ENSG00000150636	6.74864	28.5423	-2.0697	1.48876e-07	4.17779e-06	CCDC102B
ENSG00000131477	11.4265	48.3958	-2.07407	1.01547e-05	0.000162082	RAMP2
ENSG00000134548	6.72159	28.6975	-2.0876	4.75285e-05	0.000589545	SPX
ENSG00000164048	101.742	432.943	-2.08792	1.22711e-13	1.40728e-11	ZNF589
ENSG00000279117	43.2107	183.77	-2.09089	6.69038e-07	1.55978e-05	AP001972.5
ENSG00000225855	51.3319	219.878	-2.09482	1.97036e-11	1.44251e-09	RUSC1-AS1
ENSG00000102878	46.0001	197.157	-2.09776	3.18187e-09	1.42502e-07	HSF4
ENSG00000038945	6.18827	26.4817	-2.09803	0.000752647	0.00590218	MSR1
ENSG00000261087	7.602	32.566	-2.09897	2.30512e-06	4.55967e-05	AP003469.4
ENSG00000235823	21.3707	91.4749	-2.10119	1.87286e-13	2.0875e-11	OLMALINC
ENSG00000087842	96.1359	416.667	-2.11548	1.56268e-14	2.10909e-12	PIR
ENSG00000160097	40.6133	176.337	-2.11609	2.95013e-06	5.62448e-05	FNDC5
ENSG00000149485	1823.62	7906.75	-2.1163	3.45616e-28	1.85325e-25	FADS1
ENSG00000155962	25.3501	110.426	-2.11826	4.2998e-07	1.05973e-05	CLIC2
ENSG00000143494	5.49024	23.7988	-2.12193	0.000446389	0.00387248	VASH2
ENSG00000260948	4.70354	20.5475	-2.14053	2.03598e-05	0.000288321	AL390195.2
ENSG00000235961	6.59046	29.1761	-2.14636	0.000772725	0.00602391	PNMA6A
ENSG00000213144	2.50988	11.5033	-2.15648	0.000421939	0.00368941	AC084880.1
ENSG00000160285	2393.15	10790.9	-2.17285	7.3479e-36	7.28912e-33	LSS
ENSG00000167363	43.3322	195.401	-2.17358	1.38803e-10	8.88338e-09	FN3K
ENSG00000140961	109.284	494.707	-2.17935	3.77976e-22	1.29294e-19	OSGIN1
ENSG00000267480	3.97489	18.1525	-2.1808	1.613e-05	0.000238464	AP001542.3
ENSG00000169174	1458.76	6632.61	-2.18479	1.34946e-09	6.73209e-08	PCSK9
ENSG00000172901	6.41848	29.3504	-2.19166	0.00011067	0.00119526	LVRN
ENSG00000160752	734.799	3376.44	-2.20007	4.59764e-41	6.08114e-38	FDPS
ENSG00000185101	3.50431	16.5486	-2.20839	5.53129e-05	0.000663888	ANO9
ENSG00000186665	84.0591	390.93	-2.21786	1.46916e-09	7.25076e-08	C17orf58
ENSG00000147576	8.80959	41.3226	-2.22699	1.20851e-11	9.69582e-10	ADHFE1
ENSG00000099251	11.3271	53.4835	-2.23361	3.6121e-07	9.1525e-06	HSD17B7P2
ENSG00000235314	8.64032	40.9139	-2.24472	8.26718e-09	3.26085e-07	LINC00957
ENSG00000162545	131.425	624.245	-2.2477	0.000581606	0.0047761	CAMK2N1
ENSG00000231445	11.6223	55.5688	-2.25682	6.33068e-05	0.000748514	TIMM8AP1
ENSG00000159433	41.6197	200.443	-2.26599	2.96597e-07	7.69213e-06	STARD9
ENSG00000085465	8.07261	39.1757	-2.26923	8.85011e-06	0.000144159	OVGP1
ENSG00000159588	6.637	32.1338	-2.27735	5.22778e-07	1.24963e-05	CCDC17
ENSG00000131069	523.094	2547.49	-2.28361	3.03542e-41	4.30162e-38	ACSS2
ENSG00000188747	11.275	54.8921	-2.28582	4.05937e-08	1.36505e-06	NOXA1
ENSG00000171522	12.723	62.359	-2.28942	5.30638e-05	0.000643119	PTGER4
ENSG00000146411	29.6948	146.041	-2.29119	7.0451e-19	1.68403e-16	SLC2A12
ENSG00000172349	14.3572	70.5516	-2.29881	2.2329e-06	4.43008e-05	IL16
ENSG00000167508	739.889	3643.11	-2.30007	2.93326e-51	9.6993e-48	MVD
ENSG00000170962	337.918	1674.49	-2.30879	0.000224095	0.0021805	PDGFD
ENSG00000167972	29.6478	149.93	-2.33541	2.01145e-08	7.19887e-07	ABCA3
ENSG00000102032	33.6291	171.764	-2.3499	5.28305e-10	2.91154e-08	RENBP
ENSG00000162194	45.0274	229.544	-2.35056	2.16614e-27	1.0482e-24	LBHD1
ENSG00000197769	5.08667	26.3728	-2.35971	1.90437e-05	0.000272997	MAP1LC3C
ENSG00000099194	7547.39	38836.8	-2.36339	2.27558e-20	6.73843e-18	SCD
ENSG00000185862	15.5768	80.9381	-2.37621	8.71851e-07	1.95452e-05	EVI2B
ENSG00000182175	34.7403	180.224	-2.37679	4.82164e-05	0.000596392	RGMA
ENSG00000134824	2941.81	15428.3	-2.39077	3.89295e-50	8.58178e-47	FADS2
ENSG00000260470	1.98745	10.5604	-2.40156	0.000144729	0.00149788	AC023794.5
ENSG00000180113	2.97085	15.9968	-2.41461	1.36425e-05	0.000206775	TDRD6
ENSG00000197599	4.57959	24.6517	-2.42274	1.07733e-05	0.000170042	CCDC154
ENSG00000244104	1.80517	9.7094	-2.42434	0.00062194	0.00504056	RN7SL659P
ENSG00000095370	2.14539	12.013	-2.46516	0.000312491	0.00288133	SH2D3C
ENSG00000167992	51.4164	284.988	-2.47019	9.33758e-09	3.61831e-07	VWCE
ENSG00000123560	11.5586	64.6766	-2.47226	1.60164e-05	0.000237138	PLP1
ENSG00000171817	5.37002	29.9887	-2.47258	3.09229e-08	1.05769e-06	ZNF540
ENSG00000223704	1.39028	7.86656	-2.4896	0.00106589	0.00780342	LINC01422
ENSG00000162383	39.4955	223.735	-2.49919	1.62778e-05	0.000239934	SLC1A7
ENSG00000215270	4.05675	22.91	-2.50425	0.00027954	0.00261607	AP000523.1
ENSG00000243710	3.94006	22.5761	-2.50974	2.62055e-05	0.000359307	CFAP57
ENSG00000129048	105.934	609.041	-2.52307	1.72101e-08	6.2308e-07	ACKR4
ENSG00000091262	4.36607	25.1206	-2.55749	6.73707e-08	2.10163e-06	ABCC6
ENSG00000177363	545.682	3223.92	-2.56229	1.28742e-11	1.01043e-09	LRRN4CL
ENSG00000283930	5.05934	29.8418	-2.56612	4.69348e-08	1.53915e-06	AL117339.5
ENSG00000230918	5.7634	34.0143	-2.57006	0.000348118	0.00314852	AC008063.1
ENSG00000188613	13.0752	78.146	-2.58267	7.03483e-12	5.91402e-10	NANOS1
ENSG00000198520	5.11648	30.9859	-2.58657	5.58725e-05	0.00066939	ARMH1
ENSG00000138772	29.2081	175.637	-2.58788	0.00110663	0.00804233	ANXA3
ENSG00000110436	18.8665	113.84	-2.59197	3.59778e-05	0.000470534	SLC1A2
ENSG00000125378	55.3966	335.725	-2.59799	4.0653e-07	1.01011e-05	BMP4
ENSG00000183281	3.02655	18.2922	-2.60063	0.000486099	0.00415878	PLGLB1
ENSG00000110799	23.5436	143.333	-2.60226	5.48256e-10	3.00481e-08	VWF
ENSG00000135472	102.724	625.984	-2.60497	2.57017e-14	3.30018e-12	FAIM2
ENSG00000231007	1.9952	12.2677	-2.61394	0.000171399	0.00173321	CDC20P1
ENSG00000227471	2.45591	15.0693	-2.63736	2.86341e-05	0.00038699	AKR1B15
ENSG00000140057	4.34975	26.8239	-2.64896	8.12909e-06	0.000134289	AK7
ENSG00000163395	4.05516	25.1901	-2.66006	0.00139852	0.00976305	IGFN1
ENSG00000164776	12.9009	81.9781	-2.66082	2.6022e-11	1.84384e-09	PHKG1
ENSG00000010319	3.0242	19.2772	-2.67212	2.26142e-05	0.000316185	SEMA3G
ENSG00000137672	10.529	66.9456	-2.67224	0.000103258	0.00112373	TRPC6
ENSG00000231609	4.40744	28.0886	-2.67309	9.13433e-09	3.56042e-07	AC007098.1
ENSG00000205037	11.5935	74.6738	-2.68453	0.000595406	0.00486927	AC134312.1
ENSG00000223820	2.65127	16.8632	-2.68606	2.53924e-06	4.95852e-05	CFL1P1
ENSG00000157404	45.9008	300.019	-2.70789	6.45769e-09	2.60408e-07	KIT
ENSG00000270127	1.37471	9.35072	-2.7457	0.000133216	0.00139473	AC027020.2
ENSG00000149451	859.097	5769.95	-2.74754	2.73677e-13	2.90361e-11	ADAM33
ENSG00000126861	6.90183	46.8291	-2.76686	7.60969e-05	0.000868551	OMG
ENSG00000157368	4.98937	34.0968	-2.77033	1.35041e-05	0.000205619	IL34
ENSG00000158887	22.8363	156.131	-2.77327	4.4249e-21	1.41597e-18	MPZ
ENSG00000099957	22.1845	153.291	-2.78643	1.18435e-25	5.22165e-23	P2RX6
ENSG00000103485	184.038	1285.67	-2.80445	1.28851e-11	1.01043e-09	QPRT
ENSG00000126950	10.5287	74.0237	-2.81071	9.1252e-06	0.000148033	TMEM35A
ENSG00000163083	6.03839	42.5338	-2.81626	6.70766e-07	1.56197e-05	INHBB
ENSG00000107317	9.58401	71.2269	-2.88617	1.64267e-06	3.4055e-05	PTGDS
ENSG00000127083	21.1928	160.006	-2.91228	0.000276542	0.00259413	OMD
ENSG00000181800	1.12921	8.92736	-2.9195	0.000834862	0.00642002	CELF2-AS1
ENSG00000100626	45.4708	345.434	-2.92555	1.71972e-14	2.30535e-12	GALNT16
ENSG00000143387	2080.87	15844.2	-2.92872	3.35835e-19	8.6532e-17	CTSK
ENSG00000183837	0.758542	6.11232	-2.94269	0.00138944	0.00970994	PNMA3
ENSG00000138449	91.5597	704.872	-2.94389	2.03966e-05	0.000288637	SLC40A1
ENSG00000144891	26.2719	206.638	-2.97423	4.36839e-09	1.87595e-07	AGTR1
ENSG00000240204	1.37333	11.0115	-2.97988	6.5105e-05	0.000766577	SMKR1
ENSG00000231793	1.85308	14.4919	-2.99346	1.78869e-05	0.000259602	DOC2GP
ENSG00000171658	46.2385	372.997	-3.00801	9.0902e-28	4.62435e-25	NMRAL2P
ENSG00000204659	0.992792	8.14612	-3.03085	0.000274443	0.00257933	CBY3
ENSG00000139780	1.42605	11.6399	-3.04305	3.94619e-05	0.000505113	METTL21C
ENSG00000227953	2.29066	18.7457	-3.07164	8.96661e-08	2.70361e-06	LINC01341
ENSG00000144730	44.4294	378.327	-3.09086	2.94586e-08	1.01469e-06	IL17RD
ENSG00000284879	1.56843	13.8036	-3.12327	0.00016261	0.00165789	AC133644.3
ENSG00000025423	30.6008	274.531	-3.16453	5.856e-08	1.87392e-06	HSD17B6
ENSG00000188001	1.43797	13.3918	-3.24279	7.96282e-05	0.000901725	TPRG1
ENSG00000124749	24.1511	229.486	-3.24482	3.22803e-05	0.000428389	COL21A1
ENSG00000169129	1.79899	17.0898	-3.24642	0.000383688	0.00342899	AFAP1L2
ENSG00000248576	0.793152	7.66352	-3.25972	0.000699749	0.00553329	AC023794.1
ENSG00000163354	1.39397	13.417	-3.26224	1.6965e-05	0.000247948	DCST2
ENSG00000224592	1.20025	11.5288	-3.2631	0.000459017	0.00396125	AL139158.2
ENSG00000181634	8.84151	88.154	-3.31189	0.000662413	0.00531001	TNFSF15
ENSG00000235505	0.793152	7.92345	-3.31338	0.00102634	0.00756692	CASP17P
ENSG00000149809	44.5269	447.822	-3.33294	1.39453e-50	3.45843e-47	TM7SF2
ENSG00000214402	9.06774	91.8711	-3.33419	2.56165e-09	1.19935e-07	LCNL1
ENSG00000106809	16.7326	170.659	-3.35013	0.000477145	0.00409276	OGN
ENSG00000117425	24.1497	247.907	-3.35348	8.51469e-09	3.34518e-07	PTCH2
ENSG00000255690	18.1127	185.919	-3.35631	1.35049e-09	6.73209e-08	TRIL
ENSG00000285336	1.33302	14.1163	-3.36242	0.000256918	0.00244005	AC108734.4
ENSG00000034971	1.22134	12.5597	-3.3749	0.000345446	0.00313238	MYOC
ENSG00000161381	17.1019	178.466	-3.38174	1.21198e-11	9.69582e-10	PLXDC1
ENSG00000155511	1.37244	14.5528	-3.38957	1.38901e-05	0.000210046	GRIA1
ENSG00000042062	7.67816	83.8785	-3.45176	2.06881e-06	4.15016e-05	RIPOR3
ENSG00000197291	3.14005	36.2378	-3.51508	6.77301e-07	1.56982e-05	RAMP2-AS1
ENSG00000189058	60.9903	726.007	-3.57281	2.67689e-17	5.36459e-15	APOD
ENSG00000285587	0.631739	7.34292	-3.59051	0.000742502	0.00583415	AC012470.1
ENSG00000258943	1.05624	12.7375	-3.65081	1.25212e-05	0.000192645	AL049871.1
ENSG00000185585	102.847	1324.55	-3.68634	7.94404e-07	1.79715e-05	OLFML2A
ENSG00000277196	0.841028	10.7118	-3.71614	0.000216384	0.00211273	AC007325.2
ENSG00000214814	3.18425	45.2088	-3.82212	1.83856e-06	3.74508e-05	FER1L6
ENSG00000267528	0.403226	5.95273	-3.85099	0.000596971	0.00487805	AC008991.1
ENSG00000198074	16.65	240.538	-3.85536	2.10014e-06	4.20453e-05	AKR1B10
ENSG00000134042	0.580176	8.90496	-3.89847	0.000252823	0.00241154	MRO
ENSG00000133317	0.374576	6.34284	-3.95423	0.00052517	0.00442812	LGALS12
ENSG00000173930	3.73481	58.3715	-3.98533	3.87046e-08	1.30818e-06	SLCO4C1
ENSG00000111728	14.5622	238.228	-4.03168	1.16419e-07	3.41175e-06	ST8SIA1
ENSG00000218052	1.05971	16.9161	-4.05533	7.23361e-07	1.66298e-05	ADAMTS7P4
ENSG00000099960	0.180637	4.84266	-4.13985	0.000339519	0.0030871	SLC7A4
ENSG00000126878	18.3281	327.572	-4.15816	0.000767657	0.00599641	AIF1L
ENSG00000124215	0.622127	11.1746	-4.20233	1.99529e-05	0.000283813	CDH26
ENSG00000113722	0.374576	7.74299	-4.23062	0.00011161	0.00120345	CDX1
ENSG00000100078	0.399538	7.82426	-4.25093	0.000104512	0.00113556	PLA2G3
ENSG00000243323	0.180637	5.28887	-4.26285	0.00112292	0.00813984	PTPRVP
ENSG00000283421	0	3.59031	-4.27511	0.00115701	0.00833823	AF001550.2
ENSG00000203837	0.180637	5.61839	-4.34451	0.000868998	0.00662953	PNLIPRP3
ENSG00000165023	3.02018	64.281	-4.41336	0.000137817	0.00143759	DIRAS2
ENSG00000265916	0	3.95625	-4.41838	0.00102278	0.00754344	AC015818.6
ENSG00000260166	0.389926	8.88843	-4.43339	0.00054999	0.00458287	AC134312.3
ENSG00000246375	0.193938	6.28533	-4.51042	8.34671e-05	0.000938237	AC107067.1
ENSG00000148600	3.44789	86.5641	-4.65925	5.18969e-14	6.35577e-12	CDHR1
ENSG00000166473	5.12172	143.637	-4.79548	3.33521e-28	1.83807e-25	PKD1L2
ENSG00000167612	1.16747	33.5295	-4.81678	7.71413e-08	2.37215e-06	ANKRD33
ENSG00000254139	0	5.31039	-4.83922	0.00101758	0.0075135	AC104051.2
ENSG00000121769	103.837	3248.96	-4.96621	3.82883e-37	3.99811e-34	FABP3
ENSG00000125531	0	5.91102	-5.00434	0.000612124	0.00497523	FNDC11
ENSG00000187268	0	5.94453	-5.01378	5.59598e-05	0.000669627	FAM9C
ENSG00000137675	0.437801	14.1262	-5.10218	0.000449766	0.00390007	MMP27
ENSG00000118898	177.866	6879.63	-5.27334	3.08361e-29	1.87205e-26	PPL
ENSG00000130032	0.209288	11.8728	-5.42861	6.78701e-05	0.000792083	PRRG3
ENSG00000227544	0.996481	51.7831	-5.69412	5.22104e-09	2.18535e-07	AC018647.1
ENSG00000165197	1.19612	63.54	-5.72596	1.49342e-11	1.14843e-09	VEGFD
ENSG00000267339	0	9.88577	-5.7393	1.09713e-07	3.23433e-06	LINC00906
ENSG00000103184	1.33138	110.733	-6.33053	2.39537e-15	3.6557e-13	SEC14L5
ENSG00000169297	0	19.4165	-6.71945	4.48375e-08	1.4851e-06	NR0B1

## Sheet: IL1B
gene_id	IL1b	Control	log2FoldChange	pvalue	padj	gene_name
ENSG00000227544	0.195481	53.0933	-7.6226	3.62005e-10	1.46912e-08	AC018647.1
ENSG00000125414	1.25029	211.601	-7.42608	1.52115e-06	2.84792e-05	MYH2
ENSG00000179776	0	15.2994	-6.4045	5.25602e-06	8.50895e-05	CDH5
ENSG00000144229	0.421524	34.0074	-6.40441	1.59294e-06	2.96897e-05	THSD7B
ENSG00000141469	0.617005	41.6356	-6.12073	5.42579e-07	1.13186e-05	SLC14A1
ENSG00000283787	1.9356	133.688	-6.10292	6.01427e-09	1.88571e-07	PRR33
ENSG00000117115	0.19072	16.3314	-5.92463	3.72247e-06	6.28533e-05	PADI2
ENSG00000178235	0	9.76567	-5.76197	3.16443e-05	0.000413513	SLITRK1
ENSG00000046889	0	9.41683	-5.70499	6.78696e-07	1.37851e-05	PREX2
ENSG00000130595	5.11181	253.981	-5.6351	2.1777e-07	4.95491e-06	TNNT3
ENSG00000127083	3.46134	164.106	-5.55945	2.05881e-09	7.37736e-08	OMD
ENSG00000196616	57.75	2641.53	-5.5154	2.12141e-07	4.85747e-06	ADH1B
ENSG00000230018	0	7.5774	-5.39184	0.000312899	0.00292775	PPIAP39
ENSG00000124749	5.82529	235.274	-5.34115	3.79648e-08	1.02915e-06	COL21A1
ENSG00000130592	35.2937	1256.84	-5.15395	2.85343e-08	7.89967e-07	LSP1
ENSG00000226622	0.19072	9.36846	-5.12085	0.000109921	0.0012035	AC092155.1
ENSG00000139292	0.833527	23.5252	-4.86117	0.000334154	0.00309883	LGR5
ENSG00000165272	1.40353	39.3857	-4.83093	5.53011e-09	1.75773e-07	AQP3
ENSG00000117425	9.78961	254.29	-4.69862	4.11899e-19	5.64167e-17	PTCH2
ENSG00000148488	0	4.6859	-4.69199	0.000114176	0.00124081	ST8SIA6
ENSG00000269964	0.226043	6.00396	-4.48543	0.000536586	0.0045758	MEI4
ENSG00000106809	7.8125	174.943	-4.48017	4.06394e-06	6.77399e-05	OGN
ENSG00000169313	0.390962	8.89886	-4.46791	0.0012788	0.00943754	P2RY12
ENSG00000271880	0	3.87229	-4.41704	0.00054368	0.00462184	AGAP11
ENSG00000075035	0	3.75224	-4.38253	0.000524759	0.00449402	WSCD2
ENSG00000175785	0.988924	20.1854	-4.35761	0.000792862	0.00633418	PRIMA1
ENSG00000167612	1.68818	34.3421	-4.31341	6.77103e-07	1.37662e-05	ANKRD33
ENSG00000204666	0.195481	5.3495	-4.30381	0.000433112	0.00383211	AC010624.1
ENSG00000152580	11.2833	204.004	-4.17519	1.47372e-06	2.77159e-05	IGSF10
ENSG00000183128	0.183802	4.6229	-4.11243	0.00128728	0.00949679	CALHM3
ENSG00000266524	14.0897	240.25	-4.08975	5.24043e-07	1.09649e-05	GDF10
ENSG00000241644	18.1382	302.447	-4.05996	3.66333e-05	0.000472827	INMT
ENSG00000151150	5.74804	90.6801	-4.0106	2.8184e-15	2.34705e-13	ANK3
ENSG00000249464	0.767478	11.9413	-3.92966	3.32259e-05	0.000432872	LINC01091
ENSG00000106819	33.1627	503.024	-3.91967	1.84311e-15	1.57908e-13	ASPN
ENSG00000168497	66.9319	1012.15	-3.91884	3.01743e-07	6.61261e-06	CAVIN2
ENSG00000139780	0.802965	11.9148	-3.91836	7.88347e-06	0.000121936	METTL21C
ENSG00000174059	48.6574	721.996	-3.89135	1.13075e-05	0.000167314	CD34
ENSG00000187243	3.977	58.3794	-3.88399	1.43295e-08	4.16075e-07	MAGED4B
ENSG00000164920	95.9921	1382.02	-3.84816	8.07798e-19	1.0644e-16	OSR2
ENSG00000248144	1.88598	26.9878	-3.81144	5.56655e-06	8.94904e-05	ADH1C
ENSG00000169507	0.748576	10.3137	-3.73468	0.000411984	0.00367642	SLC38A11
ENSG00000271447	0.642807	7.94458	-3.73224	0.000439504	0.00388043	MMP28
ENSG00000280515	0.383739	5.09255	-3.6563	0.00125086	0.00926418	SALRNA2
ENSG00000163083	3.50601	43.6023	-3.63037	4.29164e-09	1.40927e-07	INHBB
ENSG00000164035	4.3036	52.9179	-3.61823	1.08778e-06	2.12244e-05	EMCN
ENSG00000148541	2.64668	32.3796	-3.58528	2.99427e-07	6.56878e-06	FAM13C
ENSG00000148053	43.7638	524.754	-3.58383	0.000780728	0.00625393	NTRK2
ENSG00000186832	3.18172	37.649	-3.576	7.32937e-08	1.87227e-06	KRT16
ENSG00000189058	63.9234	744.531	-3.54158	4.28159e-16	3.8925e-14	APOD
ENSG00000272321	1.759	20.3934	-3.53366	6.86598e-05	0.000808958	AP003355.2
ENSG00000205002	34.2455	385.12	-3.49071	1.39054e-05	0.000201319	AARD
ENSG00000138449	64.5943	722.166	-3.4837	1.4806e-14	1.13326e-12	SLC40A1
ENSG00000137672	6.23005	68.5314	-3.46903	2.95613e-06	5.12011e-05	TRPC6
ENSG00000254343	36.8423	401.442	-3.4448	3.57074e-14	2.51146e-12	AC091563.1
ENSG00000163815	69.0796	744.635	-3.43042	0.000130019	0.00138671	CLEC3B
ENSG00000242337	0.574764	6.28236	-3.41843	0.000883199	0.00694123	TFP1
ENSG00000171873	3.2097	33.7406	-3.41606	5.62376e-09	1.78477e-07	ADRA1D
ENSG00000171227	4.22609	43.8236	-3.39109	5.42722e-08	1.42483e-06	TMEM37
ENSG00000166106	33.7852	352.192	-3.38152	2.26141e-05	0.000309332	ADAMTS15
ENSG00000018236	1.74672	17.9413	-3.35534	1.55261e-05	0.000221666	CNTN1
ENSG00000123560	6.50092	66.3357	-3.35209	2.34038e-07	5.29037e-06	PLP1
ENSG00000248576	0.755494	7.85257	-3.33785	0.000831326	0.00658075	AC023794.1
ENSG00000224592	1.17456	11.8114	-3.32989	0.000479332	0.00416669	AL139158.2
ENSG00000145287	1.75671	17.6	-3.32461	0.000206275	0.00206463	PLAC8
ENSG00000149970	28.0718	278.192	-3.31493	4.19871e-22	7.28577e-20	CNKSR2
ENSG00000025423	29.126	281	-3.26991	1.23223e-07	2.983e-06	HSD17B6
ENSG00000108576	1.54462	14.9871	-3.2676	0.000128711	0.00137417	SLC6A4
ENSG00000240583	18.5014	177.048	-3.25777	0.000113862	0.0012385	AQP1
ENSG00000155792	264.038	2497.01	-3.24135	2.23254e-20	3.49469e-18	DEPTOR
ENSG00000196666	2.31749	21.8097	-3.2225	1.14167e-05	0.00016857	FAM180B
ENSG00000136999	221.992	2049.87	-3.20792	4.54413e-15	3.69548e-13	NOV
ENSG00000180875	201.634	1863.21	-3.20666	9.35678e-29	2.49742e-26	GREM2
ENSG00000010319	2.11662	19.7632	-3.20175	2.66262e-06	4.68581e-05	SEMA3G
ENSG00000135914	2.90623	26.9718	-3.20024	4.2224e-09	1.38872e-07	HTR2B
ENSG00000187492	1.56845	14.3393	-3.19044	1.39511e-06	2.64044e-05	CDHR4
ENSG00000166448	29.4819	266.48	-3.18022	7.28676e-08	1.86368e-06	TMEM130
ENSG00000103184	12.6539	113.459	-3.16892	9.08351e-06	0.000139051	SEC14L5
ENSG00000145526	2.88072	25.7227	-3.13772	3.74603e-09	1.25182e-07	CDH18
ENSG00000101265	74.5797	654.736	-3.13341	3.65352e-15	2.99459e-13	RASSF2
ENSG00000144218	16.0337	137.578	-3.10324	3.03148e-07	6.6274e-06	AFF3
ENSG00000244104	1.14676	9.94054	-3.0856	0.000162477	0.00168499	RN7SL659P
ENSG00000102271	5.89352	50.0363	-3.06575	3.178e-09	1.09e-07	KLHL4
ENSG00000176532	103.121	862.659	-3.06489	8.33148e-06	0.000128294	PRR15
ENSG00000145703	2.12616	17.9136	-3.06404	5.08758e-06	8.29432e-05	IQGAP2
ENSG00000136531	3.36198	27.689	-3.05115	4.37146e-09	1.42877e-07	SCN2A
ENSG00000205609	32.6121	267.453	-3.03657	0.000784763	0.00628142	EIF3CL
ENSG00000022267	1222.82	9928.01	-3.02128	1.13888e-09	4.25678e-08	FHL1
ENSG00000285336	1.86237	14.4775	-2.99598	0.000442802	0.00390788	AC108734.4
ENSG00000280237	0.998446	7.86567	-2.99593	0.000739714	0.00598295	MIR4697HG
ENSG00000146674	3467.61	27394.2	-2.98186	1.148e-11	5.81513e-10	IGFBP3
ENSG00000168079	190.036	1478.32	-2.95981	0.000304183	0.002856	SCARA5
ENSG00000265962	2.79768	21.444	-2.95176	1.70245e-06	3.13936e-05	GACAT2
ENSG00000198074	32.3989	246.089	-2.92551	4.48506e-07	9.47003e-06	AKR1B10
ENSG00000164684	124.061	940.395	-2.92213	7.08958e-05	0.000831538	ZNF704
ENSG00000248869	21.0745	158.943	-2.91603	9.17185e-08	2.28135e-06	LINC02511
ENSG00000234810	1.41045	10.398	-2.90229	0.000999382	0.00768604	AL603840.1
ENSG00000157766	290.76	2164.57	-2.89663	5.79001e-09	1.82088e-07	ACAN
ENSG00000167178	2.93895	21.7385	-2.88935	6.20497e-06	9.86116e-05	ISLR2
ENSG00000173391	11.9615	88.1299	-2.88836	0.000172359	0.0017738	OLR1
ENSG00000231793	2.08166	14.8292	-2.88695	4.98143e-05	0.000616577	DOC2GP
ENSG00000283632	1.5821	11.4803	-2.86301	0.00126523	0.00935066	EXOC3L2
ENSG00000181104	1052.56	7618.36	-2.85572	1.60883e-28	4.23978e-26	F2R
ENSG00000151789	10.6469	76.7954	-2.84146	1.90667e-15	1.62684e-13	ZNF385D
ENSG00000113924	5.5381	39.8627	-2.83814	3.54745e-05	0.000459294	HGD
ENSG00000105427	1.17226	8.3495	-2.83261	0.00135131	0.00986083	CNFN
ENSG00000164056	54.2306	386.639	-2.83219	2.14014e-13	1.38371e-11	SPRY1
ENSG00000128510	43.4613	309.074	-2.83161	0.000385556	0.00347635	CPA4
ENSG00000188869	1.7682	12.2937	-2.80308	0.000323727	0.00301554	TMC3
ENSG00000283073	3.04678	20.8745	-2.80293	8.21632e-06	0.000126708	SMUG1-AS1
ENSG00000211445	428.83	2968.09	-2.79069	8.32009e-20	1.21983e-17	GPX3
ENSG00000144730	56.7637	387.743	-2.77198	1.60209e-06	2.9807e-05	IL17RD
ENSG00000185742	82.6042	554.247	-2.74698	0.00101505	0.00779789	C11orf87
ENSG00000172348	99.9156	667.246	-2.74062	6.13034e-12	3.26413e-10	RCAN2
ENSG00000134042	1.36774	9.11939	-2.73136	0.000757207	0.00609601	MRO
ENSG00000165072	40.2624	265.624	-2.72126	3.53247e-13	2.20848e-11	MAMDC2
ENSG00000004776	706.714	4643.59	-2.71613	4.37339e-26	9.79028e-24	HSPB6
ENSG00000144339	2.88216	18.3977	-2.71102	0.000204475	0.00204858	TMEFF2
ENSG00000173267	12.1774	78.6363	-2.6834	1.55577e-05	0.000221846	SNCG
ENSG00000164220	67.5218	432.04	-2.68053	1.50849e-14	1.15037e-12	F2RL2
ENSG00000179097	2.68235	17.285	-2.67057	0.000899763	0.00705277	HTR1F
ENSG00000179082	1.45053	8.71923	-2.65335	0.000352899	0.00323942	C9orf106
ENSG00000244558	2.14718	13.4652	-2.64472	2.93309e-05	0.000388943	KCNK15-AS1
ENSG00000156486	23.238	145.055	-2.64385	1.40703e-05	0.000203562	KCNS2
ENSG00000173212	8.82252	55.1953	-2.64005	1.48065e-05	0.000212377	MAB21L3
ENSG00000180914	118.97	731.471	-2.62089	0.000147419	0.0015485	OXTR
ENSG00000223802	3.04301	19.0101	-2.61806	2.70769e-05	0.000363218	CERS1
ENSG00000102683	27.5387	168.784	-2.61671	1.65374e-07	3.89913e-06	SGCG
ENSG00000168477	6828.07	41877.9	-2.61665	1.02851e-11	5.27403e-10	TNXB
ENSG00000185585	222.121	1357.86	-2.6119	0.00102659	0.00787491	OLFML2A
ENSG00000128645	1.73335	10.6084	-2.60461	0.000729962	0.00591556	HOXD1
ENSG00000282164	1.34269	8.24434	-2.5977	0.0013614	0.00992405	PEG13
ENSG00000166165	228.449	1381.85	-2.5974	4.78566e-22	8.23411e-20	CKB
ENSG00000184160	21.2738	126.399	-2.57272	7.29468e-06	0.000113844	ADRA2C
ENSG00000117152	39.5067	235.423	-2.57252	9.75911e-07	1.92218e-05	RGS4
ENSG00000068976	8.61599	51.2074	-2.57137	1.61806e-05	0.000229315	PYGM
ENSG00000160951	8.34699	48.6319	-2.55241	2.21058e-08	6.1941e-07	PTGER1
ENSG00000079841	50.2084	294.023	-2.55145	2.38246e-06	4.24298e-05	RIMS1
ENSG00000196338	9.059	52.8042	-2.54631	2.84396e-07	6.29206e-06	NLGN3
ENSG00000150594	124.295	723.464	-2.54284	8.29621e-09	2.52513e-07	ADRA2A
ENSG00000250056	18.5295	107.188	-2.53593	0.00013959	0.00147744	LINC01018
ENSG00000116883	11.0832	63.5228	-2.52537	1.05476e-11	5.38214e-10	AL591845.1
ENSG00000111057	102.139	583.106	-2.51378	3.35069e-09	1.1417e-07	KRT18
ENSG00000128886	1.93558	10.9917	-2.48754	0.000201087	0.00202146	ELL3
ENSG00000233117	12.1553	67.5409	-2.48557	4.70484e-10	1.86571e-08	LINC00702
ENSG00000164483	6.80379	38.2754	-2.48526	8.06374e-09	2.46518e-07	SAMD3
ENSG00000164776	15.0939	83.9921	-2.47485	2.04695e-09	7.35614e-08	PHKG1
ENSG00000188783	370.869	2049.29	-2.46611	0.00121173	0.00903546	PRELP
ENSG00000138669	9.8427	54.026	-2.44417	2.15339e-15	1.82241e-13	PRKG2
ENSG00000176438	510.9	2768.68	-2.43843	5.11829e-19	6.87469e-17	SYNE3
ENSG00000173269	9.11046	48.8861	-2.42993	1.4774e-08	4.27196e-07	MMRN2
ENSG00000111907	100.112	536.348	-2.42235	1.35145e-10	5.8132e-09	TPD52L1
ENSG00000224081	2.95263	15.738	-2.41588	2.12909e-05	0.00029388	SLC44A3-AS1
ENSG00000254192	9.53978	50.9038	-2.41352	1.99634e-05	0.000277449	AC011365.2
ENSG00000102385	5.46371	29.1674	-2.4111	0.000136375	0.0014493	DRP2
ENSG00000106484	579.718	3078.27	-2.40877	1.13442e-08	3.33109e-07	MEST
ENSG00000267361	2.49637	13.4532	-2.40461	6.71544e-05	0.000796631	SEC24AP1
ENSG00000112414	165.295	874.438	-2.40278	3.72518e-16	3.40152e-14	ADGRG6
ENSG00000137463	18.6805	98.9572	-2.40038	8.41079e-09	2.54946e-07	MGARP
ENSG00000173641	129.274	679.193	-2.3928	4.7894e-09	1.5459e-07	HSPB7
ENSG00000163624	9.23128	48.3743	-2.39196	2.00459e-09	7.22034e-08	CDS1
ENSG00000164236	249.244	1307.59	-2.39148	3.11684e-07	6.75933e-06	ANKRD33B
ENSG00000160097	34.4776	180.859	-2.38954	1.89345e-06	3.44879e-05	FNDC5
ENSG00000139874	150.811	784.041	-2.37909	5.73344e-10	2.26069e-08	SSTR1
ENSG00000258943	2.46996	13.0463	-2.36938	5.05681e-05	0.000624793	AL049871.1
ENSG00000225783	10.259	52.2292	-2.35837	0.00130256	0.00958909	MIAT
ENSG00000272842	1.7401	8.97491	-2.35549	0.000510056	0.00438977	AL391834.1
ENSG00000087589	8.8889	45.5768	-2.34996	0.000750664	0.00605504	CASS4
ENSG00000260470	2.09098	10.8075	-2.33806	0.000120793	0.00129829	AC023794.5
ENSG00000122547	39.545	199.413	-2.33027	4.42391e-19	6.0197e-17	EEPD1
ENSG00000182575	13.686	68.8416	-2.32768	2.26613e-08	6.3412e-07	NXPH3
ENSG00000141854	4.95225	24.5826	-2.32562	3.49957e-07	7.52661e-06	MISP3
ENSG00000185008	7.3573	36.4404	-2.31599	0.000653842	0.0053825	ROBO2
ENSG00000176771	63.8894	317.324	-2.31154	2.07321e-07	4.77457e-06	NCKAP5
ENSG00000164764	39.131	193.668	-2.30686	0.000214898	0.00213147	SBSPON
ENSG00000165323	21.2493	105.033	-2.30239	2.7797e-07	6.16301e-06	FAT3
ENSG00000141574	117.528	579.98	-2.30111	9.1855e-18	1.05654e-15	SECTM1
ENSG00000267092	1.63909	7.78955	-2.29921	0.00107498	0.0081828	AC027307.1
ENSG00000213316	5.32587	25.9702	-2.29185	0.000256444	0.00247171	LTC4S
ENSG00000223813	7.74976	38.0145	-2.28943	1.83197e-06	3.34854e-05	AC007255.1
ENSG00000244414	7.84458	38.0003	-2.28656	0.000565307	0.00477062	CFHR1
ENSG00000225279	7.85948	37.8438	-2.2777	0.000792875	0.00633418	AL121987.1
ENSG00000278989	2.7413	13.1663	-2.26025	0.000150283	0.00157382	AP001148.1
ENSG00000104783	7.75837	36.6776	-2.25016	4.32944e-06	7.15922e-05	KCNN4
ENSG00000072952	165.868	787.283	-2.2467	2.30484e-10	9.61614e-09	MRVI1
ENSG00000180739	9.26519	44.1883	-2.2464	3.23794e-06	5.53909e-05	S1PR5
ENSG00000187736	3.00437	14.0287	-2.23903	5.30756e-05	0.000650372	NHEJ1
ENSG00000255389	6.23967	29.4545	-2.23719	7.80085e-08	1.97574e-06	Z97989.1
ENSG00000216775	34.345	161.046	-2.2287	4.98132e-09	1.60536e-07	AL109918.1
ENSG00000149212	480.604	2248.48	-2.22591	4.02276e-07	8.5372e-06	SESN3
ENSG00000145242	20.8242	96.8907	-2.21822	4.53284e-05	0.000568832	EPHA5
ENSG00000178977	6.24397	29.0558	-2.21392	9.55068e-05	0.00107016	LINC00324
ENSG00000168916	17.8265	82.6096	-2.20221	2.42342e-09	8.55138e-08	ZNF608
ENSG00000135218	710.648	3269.52	-2.20197	2.48568e-05	0.000336911	CD36
ENSG00000166473	32.1655	147.101	-2.19537	2.3797e-09	8.41137e-08	PKD1L2
ENSG00000164106	55.8397	254.46	-2.18747	3.02888e-06	5.22439e-05	SCRG1
ENSG00000280339	10.6633	48.8187	-2.18729	3.09165e-07	6.72954e-06	AP001528.3
ENSG00000139209	23.2876	106.07	-2.18658	1.58017e-11	7.81414e-10	SLC38A4
ENSG00000125968	16.4759	73.2037	-2.16663	6.21545e-10	2.42321e-08	ID1
ENSG00000204682	39.0406	174.496	-2.16083	7.11396e-06	0.000111358	CASC10
ENSG00000205795	40.6085	181.089	-2.15321	3.68156e-11	1.74593e-09	CYS1
ENSG00000115896	35.366	157.443	-2.15183	1.63952e-06	3.04489e-05	PLCL1
ENSG00000255690	42.9495	190.427	-2.1471	0.000183665	0.00187346	TRIL
ENSG00000158008	10.6264	46.7546	-2.14514	0.000278972	0.00266296	EXTL1
ENSG00000247809	7.54969	33.9072	-2.14141	1.03201e-06	2.02883e-05	NR2F2-AS1
ENSG00000160179	6.88099	29.9254	-2.1369	0.000357852	0.00327478	ABCG1
ENSG00000158555	186.467	818.669	-2.13463	6.73458e-09	2.09265e-07	GDPD5
ENSG00000083067	9.45424	41.2916	-2.13148	0.000301115	0.00283277	TRPM3
ENSG00000197971	581.759	2539.39	-2.12592	4.37603e-42	2.33602e-39	MBP
ENSG00000186684	13.0021	56.1005	-2.11204	4.66181e-05	0.00058186	CYP27C1
ENSG00000260285	28.4918	122.789	-2.10843	9.95565e-18	1.13883e-15	AL133367.1
ENSG00000259969	5.47055	24.0406	-2.10549	1.49107e-05	0.000213498	AL049838.1
ENSG00000118898	1640.18	7047.95	-2.10335	3.04479e-05	0.000401454	PPL
ENSG00000143028	81.1139	347.342	-2.09956	0.000249915	0.00241438	SYPL2
ENSG00000167371	28.291	120.771	-2.09658	6.07011e-09	1.8975e-07	PRRT2
ENSG00000259676	3.26214	14.0664	-2.09601	0.00051628	0.00443417	AC103982.1
ENSG00000219438	50.2462	213.842	-2.09044	0.000487046	0.00422845	FAM19A5
ENSG00000169744	101.512	428.402	-2.07605	2.42575e-18	2.98827e-16	LDB2
ENSG00000082196	8.41605	35.4684	-2.07582	0.00134502	0.00982874	C1QTNF3
ENSG00000262877	4.32085	17.6273	-2.07302	8.6689e-05	0.000987296	AC110285.2
ENSG00000167641	52.9765	222.882	-2.07128	2.10173e-07	4.83491e-06	PPP1R14A
ENSG00000091409	125.926	527.752	-2.06707	2.16338e-06	3.88941e-05	ITGA6
ENSG00000176435	58.6834	244.382	-2.05961	8.71643e-05	0.000990002	CLEC14A
ENSG00000183023	55.5002	228.81	-2.04413	1.22971e-13	8.12742e-12	SLC8A1
ENSG00000165197	15.7808	65.1747	-2.04394	0.00101243	0.00778065	VEGFD
ENSG00000185633	109.611	450.687	-2.04009	1.89954e-13	1.2397e-11	NDUFA4L2
ENSG00000204291	2596.74	10657.9	-2.03717	2.60254e-05	0.000350014	COL15A1
ENSG00000105655	105.403	424.456	-2.01025	3.52632e-13	2.20848e-11	ISYNA1
ENSG00000213145	3.41224	13.4407	-1.99866	0.00038406	0.00346473	CRIP1
ENSG00000167646	6.05339	24.0531	-1.98902	0.00098134	0.00757808	DNAAF3
ENSG00000205221	87.6227	343.854	-1.97206	4.06304e-06	6.77399e-05	VIT
ENSG00000235387	6.9533	26.8002	-1.97077	0.000197744	0.00199653	SPAAR
ENSG00000237356	3.12937	12.2655	-1.96747	0.00040163	0.00359945	AL365295.1
ENSG00000102466	35.7609	139.227	-1.96383	1.37962e-11	6.87138e-10	FGF14
ENSG00000170421	61.5058	239.447	-1.96161	1.85907e-11	9.12832e-10	KRT8
ENSG00000023892	4.58245	17.9975	-1.95524	0.00035559	0.00325695	DEF6
ENSG00000108984	9.23235	36.0745	-1.95483	0.000116554	0.00126052	MAP2K6
ENSG00000169432	167.785	650.3	-1.95377	6.64197e-07	1.35303e-05	SCN9A
ENSG00000275367	5.10103	19.6631	-1.95278	5.5182e-06	8.8919e-05	AC092111.1
ENSG00000169247	9.28341	35.4686	-1.94605	0.000980464	0.00757694	SH3TC2
ENSG00000016402	35.8515	137.999	-1.94479	0.000241164	0.00234507	IL20RA
ENSG00000246985	9.84766	37.5168	-1.93776	2.01969e-08	5.71302e-07	SOCS2-AS1
ENSG00000071575	105.942	402.519	-1.92729	1.07904e-10	4.68986e-09	TRIB2
ENSG00000213901	7.84005	29.8363	-1.92696	1.4176e-06	2.67813e-05	SLC23A3
ENSG00000128482	29.2111	110.195	-1.92091	1.31004e-07	3.16033e-06	RNF112
ENSG00000120500	3.04045	11.2721	-1.91963	0.00137237	0.00998783	ARR3
ENSG00000213366	150.998	571.036	-1.91935	2.93627e-18	3.57487e-16	GSTM2
ENSG00000016391	19.0523	71.5446	-1.917	2.84898e-05	0.000379238	CHDH
ENSG00000278817	7.61127	28.5119	-1.91181	0.00127795	0.0094346	AC007325.4
ENSG00000260293	3.02136	11.6125	-1.90844	0.000745047	0.00601906	AC106820.4
ENSG00000205978	404.54	1517.35	-1.90712	2.70013e-13	1.72436e-11	NYNRIN
ENSG00000130751	16.7342	62.311	-1.90499	1.86519e-05	0.000260963	NPAS1
ENSG00000126785	419.977	1571.27	-1.9038	4.96231e-12	2.68339e-10	RHOJ
ENSG00000198774	50.4316	187.931	-1.89644	1.13863e-10	4.93856e-09	RASSF9
ENSG00000218052	4.6379	17.327	-1.88843	0.00131312	0.00963923	ADAMTS7P4
ENSG00000155749	5.47539	20.2753	-1.88773	0.000431534	0.0038214	ALS2CR12
ENSG00000128567	214.371	791.434	-1.88512	4.52529e-13	2.8123e-11	PODXL
ENSG00000105048	9.59693	35.3729	-1.88111	0.000566195	0.00477424	TNNT1
ENSG00000197291	10.0643	37.1663	-1.87808	0.000300556	0.00283006	RAMP2-AS1
ENSG00000258768	7.57078	27.6069	-1.85959	5.86724e-07	1.21422e-05	AL356019.2
ENSG00000161714	632.073	2285.44	-1.85386	9.42447e-19	1.21868e-16	PLCD3
ENSG00000143554	169.939	613.664	-1.85315	2.9407e-09	1.0153e-07	SLC27A3
ENSG00000040731	20.4986	73.6409	-1.84791	5.69744e-09	1.80266e-07	CDH10
ENSG00000101384	684.069	2442.22	-1.83608	6.19442e-05	0.000744582	JAG1
ENSG00000231609	8.09777	28.7494	-1.8341	3.42013e-05	0.000443913	AC007098.1
ENSG00000138735	160.394	567.771	-1.82395	2.83308e-16	2.65684e-14	PDE5A
ENSG00000111305	5.42562	19.2107	-1.82325	0.000239706	0.00233307	GSG1
ENSG00000075213	89.9195	317.375	-1.81894	2.52076e-06	4.46256e-05	SEMA3A
ENSG00000183873	11.2833	39.4935	-1.81267	0.000347274	0.00319784	SCN5A
ENSG00000169851	428.096	1501.56	-1.81014	2.12953e-05	0.00029388	PCDH7
ENSG00000107821	110.278	386.429	-1.80911	7.38966e-08	1.88536e-06	KAZALD1
ENSG00000143382	305.379	1068.98	-1.80776	4.95204e-05	0.000613305	ADAMTSL4
ENSG00000162383	65.5635	229.253	-1.80745	0.000914196	0.00715513	SLC1A7
ENSG00000111052	19.3531	67.7991	-1.80345	1.4812e-05	0.000212377	LIN7A
ENSG00000099338	3.76509	13.0369	-1.80283	0.000406188	0.00363561	CATSPERG
ENSG00000280537	4.81805	16.5736	-1.80241	4.59371e-05	0.000574738	AC068946.1
ENSG00000144645	114.247	398.319	-1.80052	3.1098e-10	1.27746e-08	OSBPL10
ENSG00000120693	50.3516	174.599	-1.79141	3.45467e-14	2.44635e-12	SMAD9
ENSG00000205763	93.9604	323.551	-1.78568	6.20402e-13	3.81007e-11	RP9P
ENSG00000134548	8.64703	29.4054	-1.78132	0.000277127	0.00264656	SPX
ENSG00000070601	15.4595	53.242	-1.78114	0.000493759	0.00426715	FRMPD1
ENSG00000138771	225.773	775.565	-1.7804	1.1104e-05	0.000165124	SHROOM3
ENSG00000157514	495.348	1696.72	-1.77681	4.17112e-13	2.59996e-11	TSC22D3
ENSG00000185551	875.768	2993.46	-1.77354	3.94473e-17	4.1269e-15	NR2F2
ENSG00000064692	14.9909	50.8882	-1.77035	2.95649e-05	0.000391298	SNCAIP
ENSG00000167306	5.21664	17.699	-1.75097	0.000659053	0.00541897	MYO5B
ENSG00000177570	120.743	405.529	-1.74829	2.12657e-09	7.60706e-08	SAMD12
ENSG00000144681	58.5939	196.217	-1.74768	8.22584e-06	0.000126761	STAC
ENSG00000185112	265.801	891.869	-1.74582	0.000365788	0.00333117	FAM43A
ENSG00000249087	27.0652	90.4281	-1.74215	1.06279e-07	2.60309e-06	ZNF436-AS1
ENSG00000126218	121.389	405.492	-1.74118	9.80017e-06	0.000148277	F10
ENSG00000253368	363.126	1212.42	-1.74029	1.37592e-09	5.07894e-08	TRNP1
ENSG00000228307	4.27318	14.2453	-1.73545	0.000972471	0.00753475	OR2S1P
ENSG00000126603	518.784	1716.02	-1.72627	3.60063e-34	1.31511e-31	GLIS2
ENSG00000259275	6.26394	20.3428	-1.72231	0.000152821	0.00159798	AC087477.2
ENSG00000185561	245.346	807.891	-1.7191	3.69371e-09	1.23831e-07	TLCD2
ENSG00000255471	14.2446	46.921	-1.71458	2.14976e-07	4.90207e-06	AP001528.2
ENSG00000115252	219.431	717.19	-1.70907	7.94818e-11	3.58167e-09	PDE1A
ENSG00000147251	836.884	2732.41	-1.70718	2.8341e-13	1.80438e-11	DOCK11
ENSG00000107611	64.0626	209.169	-1.70525	1.57948e-06	2.94699e-05	CUBN
ENSG00000064687	136.793	445.429	-1.70423	3.51511e-09	1.188e-07	ABCA7
ENSG00000183775	193.79	630.538	-1.70286	6.16504e-05	0.000742049	KCTD16
ENSG00000204634	112.72	366.214	-1.69994	2.68057e-11	1.28884e-09	TBC1D8
ENSG00000284707	6.0377	19.719	-1.69966	1.07983e-05	0.000161502	AC079781.5
ENSG00000112293	5.7665	18.8705	-1.69167	0.000435012	0.00384565	GPLD1
ENSG00000145819	236.298	762.927	-1.69159	2.32627e-06	4.15713e-05	ARHGAP26
ENSG00000172264	12.3499	39.3368	-1.67393	1.29951e-05	0.000188929	MACROD2
ENSG00000114200	97.3397	309.774	-1.67142	3.06116e-05	0.000403356	BCHE
ENSG00000198947	147.083	467.41	-1.66857	1.66492e-09	6.11322e-08	DMD
ENSG00000198807	6.59037	20.9799	-1.66721	0.000820224	0.00651516	PAX9
ENSG00000112759	182.657	578.515	-1.66234	9.90065e-10	3.74087e-08	SLC29A1
ENSG00000154027	141.11	445.563	-1.65901	1.77516e-06	3.25614e-05	AK5
ENSG00000279722	5.47254	17.0004	-1.65825	0.000707609	0.00575682	AC007342.7
ENSG00000254602	12.7053	39.6755	-1.65254	1.08384e-06	2.11872e-05	AP000662.1
ENSG00000185483	823.272	2587.81	-1.65237	7.73669e-05	0.000895332	ROR1
ENSG00000116741	54.8927	172.358	-1.64935	1.23016e-05	0.000179977	RGS2
ENSG00000137460	36.6679	114.727	-1.64897	2.22388e-06	3.98785e-05	FHDC1
ENSG00000184347	10916.1	34209.4	-1.64794	0.000895765	0.00702408	SLIT3
ENSG00000136274	48.4135	148.931	-1.62431	0.00011108	0.00121331	NACAD
ENSG00000106823	314.695	968.938	-1.62237	0.00039225	0.00352601	ECM2
ENSG00000080573	656.537	2014.95	-1.61801	1.29174e-15	1.11588e-13	COL5A3
ENSG00000259345	21.1605	64.8842	-1.61734	0.000982572	0.00758198	AC013652.1
ENSG00000182809	320.78	982.186	-1.61412	3.14685e-12	1.76714e-10	CRIP2
ENSG00000154133	22.3218	68.5912	-1.61253	0.000350569	0.00322087	ROBO4
ENSG00000183496	148.092	452.742	-1.61179	1.04142e-05	0.00015643	MEX3B
ENSG00000158246	48.0157	144.234	-1.59314	0.000241307	0.00234537	TENT5B
ENSG00000204131	107.93	325.496	-1.59309	4.63436e-06	7.60305e-05	NHSL2
ENSG00000277702	43.1356	129.66	-1.58983	1.44461e-11	7.16081e-10	AC239859.6
ENSG00000172789	9.90156	29.6221	-1.5842	0.000491012	0.004254	HOXC5
ENSG00000155875	11.3367	34.0498	-1.58372	0.000773213	0.00621046	SAXO1
ENSG00000284237	10.7784	31.9359	-1.58034	1.15127e-05	0.000169641	AL356275.1
ENSG00000154122	682.493	2041.51	-1.58018	1.09849e-13	7.35352e-12	ANKH
ENSG00000085741	20.8786	62.5032	-1.57899	4.76543e-06	7.81192e-05	WNT11
ENSG00000131242	17.5485	52.5751	-1.57624	0.000493722	0.00426715	RAB11FIP4
ENSG00000019991	90.2575	268.375	-1.56994	2.08729e-05	0.000288932	HGF
ENSG00000198542	1787.64	5304.03	-1.56905	3.3716e-09	1.14695e-07	ITGBL1
ENSG00000186862	10.5103	31.0958	-1.56899	4.84398e-05	0.000601711	PDZD7
ENSG00000241697	9.02285	27.0749	-1.56765	6.86052e-05	0.000808772	TMEFF1
ENSG00000188385	22.6044	66.7545	-1.56736	0.000279326	0.0026639	JAKMIP3
ENSG00000185614	32.7573	97.2564	-1.56693	9.29527e-07	1.83778e-05	INKA1
ENSG00000167608	7.21981	21.4102	-1.56114	0.00121719	0.0090664	TMC4
ENSG00000164099	563.453	1658.23	-1.55759	7.07002e-16	6.3172e-14	PRSS12
ENSG00000196950	244.187	718.45	-1.5569	6.29659e-10	2.45026e-08	SLC39A10
ENSG00000272870	9.09125	26.5867	-1.55673	1.80927e-05	0.000253993	AC097534.2
ENSG00000100065	79.0051	232.247	-1.5532	2.07708e-06	3.74396e-05	CARD10
ENSG00000167549	96.266	281.707	-1.5503	8.04569e-07	1.61567e-05	CORO6
ENSG00000186205	9.0695	26.8022	-1.5482	1.25912e-05	0.000183697	2001-03-01
ENSG00000102452	45.3538	132.217	-1.54102	7.6482e-06	0.000118818	NALCN
ENSG00000110881	106.603	310.239	-1.53983	1.12336e-05	0.000166576	ASIC1
ENSG00000260025	31.9317	92.3249	-1.53947	3.81918e-08	1.03396e-06	AC009414.2
ENSG00000183111	14.587	42.6766	-1.53857	0.000560571	0.00473642	ARHGEF37
ENSG00000171817	10.6058	30.7206	-1.53306	4.33979e-06	7.17064e-05	ZNF540
ENSG00000010278	715.87	2069.78	-1.53134	3.08826e-06	5.30482e-05	CD9
ENSG00000105516	53.6518	155.071	-1.53029	5.22031e-05	0.000641947	DBP
ENSG00000197457	49.6395	143.425	-1.52717	0.000509398	0.00438592	STMN3
ENSG00000090776	329.323	943.85	-1.51899	9.53951e-15	7.46628e-13	EFNB1
ENSG00000103145	251.747	713.897	-1.5045	9.47282e-22	1.61651e-19	HCFC1R1
ENSG00000172399	12.4557	35.1375	-1.50426	0.000963167	0.00747657	MYOZ2
ENSG00000102981	8.33497	23.7304	-1.50179	0.000993051	0.00764866	PARD6A
ENSG00000177363	1169.41	3303.83	-1.49849	0.000171478	0.00176732	LRRN4CL
ENSG00000178226	7.80889	21.7498	-1.49673	0.000298606	0.00281297	PRSS36
ENSG00000099840	25.759	71.9398	-1.49392	7.33572e-05	0.000856547	IZUMO4
ENSG00000167363	71.1212	200.038	-1.48983	5.61257e-06	9.00973e-05	FN3K
ENSG00000120156	372.629	1046.83	-1.48971	2.14043e-08	6.01371e-07	TEK
ENSG00000152527	96.4364	268.816	-1.47869	1.05378e-08	3.12517e-07	PLEKHH2
ENSG00000164659	242.482	674.879	-1.47774	2.51675e-08	6.99548e-07	KIAA1324L
ENSG00000153237	16.5718	45.818	-1.4759	0.000608437	0.00506479	CCDC148
ENSG00000151572	91.8109	253.73	-1.46805	8.74138e-07	1.74484e-05	ANO4
ENSG00000136153	2204.03	6086.72	-1.46557	1.75871e-09	6.41236e-08	LMO7
ENSG00000099864	1501.83	4133.29	-1.46066	0.000199285	0.00200819	PALM
ENSG00000187800	965.99	2654.57	-1.45866	1.88146e-09	6.82408e-08	PEAR1
ENSG00000272316	34.6203	95.4491	-1.45858	2.90997e-09	1.00636e-07	AL021368.2
ENSG00000269893	284.224	780.975	-1.4583	1.05994e-12	6.30482e-11	SNHG8
ENSG00000152518	1589.04	4365.55	-1.45812	3.94206e-12	2.18271e-10	ZFP36L2
ENSG00000129048	227.004	623.844	-1.45762	0.000322362	0.00300683	ACKR4
ENSG00000164484	675.705	1856.13	-1.45757	1.15698e-06	2.24067e-05	TMEM200A
ENSG00000185567	4305.07	11765	-1.45034	2.131e-10	8.98081e-09	AHNAK2
ENSG00000116032	11.394	31.0805	-1.44558	0.000318707	0.00297808	GRIN3B
ENSG00000076344	57.3896	155.209	-1.43646	1.761e-07	4.12399e-06	RGS11
ENSG00000168491	20.0719	54.6075	-1.436	1.56091e-05	0.000222275	CCDC110
ENSG00000079819	1545.33	4180.02	-1.43554	7.53882e-08	1.91403e-06	EPB41L2
ENSG00000274565	22.5656	60.9684	-1.43332	4.07111e-05	0.000518027	AC080038.1
ENSG00000260912	13.6179	36.8026	-1.42935	0.000132407	0.00141073	AL158206.1
ENSG00000076356	321.804	864.665	-1.42581	1.83026e-05	0.000256422	PLXNA2
ENSG00000197077	460.308	1236.84	-1.42571	1.05214e-07	2.58307e-06	KIAA1671
ENSG00000064655	34.9147	93.5032	-1.42491	2.27712e-11	1.10507e-09	EYA2
ENSG00000100156	15.0357	40.026	-1.42016	5.25029e-05	0.000644491	SLC16A8
ENSG00000102057	14.7296	39.5275	-1.41695	0.00117564	0.00880737	KCND1
ENSG00000143816	49.0387	130.965	-1.41689	0.000103469	0.00114095	WNT9A
ENSG00000235314	15.7003	41.9113	-1.41626	0.000780469	0.00625393	LINC00957
ENSG00000272031	22.8225	60.6122	-1.41554	2.2398e-05	0.000306981	ANKRD34A
ENSG00000185761	145.504	387.547	-1.41482	6.03238e-07	1.24222e-05	ADAMTSL5
ENSG00000124942	28987.9	77169.1	-1.41257	3.72636e-17	3.95811e-15	AHNAK
ENSG00000115504	1496.53	3967.83	-1.4068	3.88307e-09	1.28934e-07	EHBP1
ENSG00000196154	2937.44	7780.36	-1.4053	0.000158545	0.00165038	S100A4
ENSG00000171658	144.793	382.099	-1.40231	3.78629e-06	6.36121e-05	NMRAL2P
ENSG00000163359	24317	64005.9	-1.39624	7.61439e-05	0.000884621	COL6A3
ENSG00000137070	118.346	311.464	-1.39586	8.51506e-09	2.57667e-07	IL11RA
ENSG00000144063	20.423	53.2217	-1.39386	0.000369913	0.00336151	MALL
ENSG00000259728	22.2629	58.0199	-1.39302	3.43154e-07	7.39557e-06	LINC00933
ENSG00000164048	169.373	443.627	-1.38932	3.90321e-06	6.54275e-05	ZNF589
ENSG00000115525	364.848	952.225	-1.38359	0.000971837	0.00753264	ST3GAL5
ENSG00000134138	387.808	1011.15	-1.38305	1.73001e-07	4.05597e-06	MEIS2
ENSG00000104081	18.7112	49.082	-1.38085	0.000520715	0.00446157	BMF
ENSG00000005379	24.5401	63.7477	-1.37867	0.000220959	0.00217707	TSPOAP1
ENSG00000143320	660.223	1713.02	-1.37526	6.79838e-05	0.000802914	CRABP2
ENSG00000099953	107.231	278.183	-1.37396	6.32622e-07	1.29377e-05	MMP11
ENSG00000197747	3721.43	9638.18	-1.37296	1.47845e-05	0.000212275	S100A10
ENSG00000235770	61.5679	158.869	-1.3667	0.000159113	0.00165344	LINC00607
ENSG00000136826	1385.5	3571.8	-1.36634	2.95131e-06	5.11602e-05	KLF4
ENSG00000137962	832.278	2142.96	-1.3646	1.14305e-05	0.000168654	ARHGAP29
ENSG00000105227	122.189	313.13	-1.35767	1.15778e-11	5.83629e-10	PRX
ENSG00000261534	41.6401	106.485	-1.35681	1.81268e-09	6.58608e-08	AL596244.1
ENSG00000183508	9.40941	24.0143	-1.3529	0.000497862	0.00429904	TENT5C
ENSG00000261087	13.0886	33.328	-1.34859	0.000660299	0.00542279	AP003469.4
ENSG00000167779	4006.28	10199.7	-1.34826	8.57331e-11	3.80571e-09	IGFBP6
ENSG00000112561	39.1278	100.17	-1.34812	4.57718e-05	0.00057336	TFEB
ENSG00000137831	1077.39	2736.32	-1.34484	2.29511e-29	6.28709e-27	UACA
ENSG00000204839	35.9793	91.6519	-1.3448	4.85884e-08	1.28371e-06	MROH6
ENSG00000187098	169.044	428.649	-1.34229	9.50496e-06	0.000144441	MITF
ENSG00000163701	20.0435	50.8261	-1.3387	0.000427536	0.00379086	IL17RE
ENSG00000007237	695.441	1756.76	-1.3369	0.00045241	0.0039742	GAS7
ENSG00000213626	189.445	475.799	-1.32938	1.15136e-05	0.000169641	LBH
ENSG00000168071	14.7883	37.2786	-1.32817	0.000100652	0.00111789	CCDC88B
ENSG00000251432	24.042	59.8939	-1.32656	2.87495e-08	7.93815e-07	AC108062.1
ENSG00000125945	307.977	770.682	-1.32316	5.15047e-09	1.6522e-07	ZNF436
ENSG00000128536	42.973	107.606	-1.32267	1.39735e-12	8.08098e-11	CDHR3
ENSG00000150687	3549.11	8873.63	-1.32213	0.000529587	0.00452791	PRSS23
ENSG00000156113	406.047	1014.98	-1.32212	6.56296e-05	0.000782086	KCNMA1
ENSG00000169750	14.9596	37.6559	-1.31641	6.90102e-05	0.000812626	RAC3
ENSG00000189129	315.873	786.793	-1.31544	3.3889e-11	1.62192e-09	PLAC9
ENSG00000010295	683.872	1700.64	-1.31444	2.04654e-17	2.21911e-15	IFFO1
ENSG00000166482	1718.84	4269.49	-1.3126	1.66143e-06	3.07187e-05	MFAP4
ENSG00000276600	166.951	414.397	-1.31196	8.3363e-11	3.72432e-09	RAB7B
ENSG00000231160	19.6009	48.3922	-1.30317	0.000988932	0.00762822	KLF3-AS1
ENSG00000262691	32.3945	79.6714	-1.29997	1.83064e-07	4.2631e-06	AC040160.1
ENSG00000196782	45.0344	110.841	-1.29417	1.35048e-06	2.57625e-05	MAML3
ENSG00000148180	6281.18	15397	-1.29353	0.000348752	0.00320701	GSN
ENSG00000158292	212.529	519.641	-1.28833	4.58246e-08	1.21687e-06	GPR153
ENSG00000245812	59.3303	144.743	-1.28546	1.79172e-05	0.000251699	LINC02202
ENSG00000065413	98.3585	239.388	-1.28526	1.08374e-13	7.27818e-12	ANKRD44
ENSG00000176472	45.2368	110.769	-1.28169	1.44392e-09	5.31111e-08	ZNF575
ENSG00000197614	5806.5	14079.2	-1.27782	3.60458e-06	6.11105e-05	MFAP5
ENSG00000272644	8.19703	19.9666	-1.27764	0.000410249	0.00366565	AC097468.3
ENSG00000067836	68.4981	166.174	-1.27698	5.05068e-09	1.62519e-07	ROGDI
ENSG00000079156	85.3723	206.648	-1.27648	3.38559e-14	2.40562e-12	OSBPL6
ENSG00000152284	248.926	601.398	-1.2713	5.1341e-12	2.76909e-10	TCF7L1
ENSG00000285184	11.5895	27.9358	-1.26234	0.000980964	0.00757799	AC244033.2
ENSG00000168646	69.4454	166.656	-1.26042	2.02042e-07	4.66331e-06	AXIN2
ENSG00000162636	403.035	965.062	-1.25984	4.82321e-08	1.27751e-06	FAM102B
ENSG00000185909	297.426	711.527	-1.25761	1.3903e-06	2.63372e-05	KLHDC8B
ENSG00000279278	11.5154	27.4764	-1.25109	5.10537e-05	0.000630046	AC245060.6
ENSG00000255320	16.3724	38.8711	-1.24808	0.000256014	0.00246871	AP000759.1
ENSG00000178015	41.2484	97.5319	-1.24241	0.00015388	0.00160824	GPR150
ENSG00000127863	175.55	415.473	-1.24221	1.60646e-05	0.000227982	TNFRSF19
ENSG00000102024	4520.69	10681.5	-1.24054	4.144e-11	1.94749e-09	PLS3
ENSG00000160789	10117.5	23841.4	-1.23667	4.22263e-32	1.35248e-29	LMNA
ENSG00000240038	25.9332	60.9902	-1.23349	0.000207489	0.00207081	AMY2B
ENSG00000182379	55.5155	130.571	-1.23187	4.5407e-05	0.000569132	NXPH4
ENSG00000103647	199.849	468.962	-1.22932	7.99425e-06	0.000123466	CORO2B
ENSG00000162687	18.7071	43.8113	-1.2285	0.000296621	0.00279681	KCNT2
ENSG00000156042	26.1195	61.2164	-1.22524	0.00123841	0.00919114	CFAP70
ENSG00000135931	399.312	933.841	-1.22521	7.39977e-08	1.88563e-06	ARMC9
ENSG00000156299	115.294	269.436	-1.22513	7.48122e-05	0.000871161	TIAM1
ENSG00000106333	2717.53	6351.08	-1.22472	1.1257e-29	3.2104e-27	PCOLCE
ENSG00000184408	535.292	1249.19	-1.22243	3.45246e-08	9.45747e-07	KCND2
ENSG00000072163	788.417	1838.68	-1.22186	0.000467919	0.00408676	LIMS2
ENSG00000132669	506.459	1180.86	-1.22072	7.26966e-11	3.29015e-09	RIN2
ENSG00000081189	54.8024	127.868	-1.22072	2.29692e-09	8.14645e-08	MEF2C
ENSG00000143412	26.4307	61.8039	-1.21942	1.85748e-05	0.000260059	ANXA9
ENSG00000189184	2579.49	5996.87	-1.21716	3.56504e-05	0.000460998	PCDH18
ENSG00000175274	734.459	1702.26	-1.21224	1.36569e-08	3.97655e-07	TP53I11
ENSG00000143819	1156.44	2678.3	-1.21117	5.51741e-20	8.3237e-18	EPHX1
ENSG00000052795	517.794	1197.83	-1.2099	2.18646e-05	0.000300922	FNIP2
ENSG00000138185	61.4939	142.187	-1.20844	0.000342154	0.00315653	ENTPD1
ENSG00000231407	10.1104	23.0767	-1.20296	0.00134672	0.00983425	AL354732.1
ENSG00000166780	824.676	1898.79	-1.20277	3.66283e-06	6.19468e-05	C16orf45
ENSG00000077684	611.602	1407.13	-1.20242	2.94221e-06	5.10449e-05	JADE1
ENSG00000204219	120.227	276.816	-1.20213	0.000114193	0.00124081	TCEA3
ENSG00000182580	99.3758	228.622	-1.19783	1.53151e-08	4.41003e-07	EPHB3
ENSG00000164093	106.807	244.984	-1.19669	1.9229e-07	4.45305e-06	PITX2
ENSG00000120833	104.486	239.02	-1.19541	3.04535e-06	5.2441e-05	SOCS2
ENSG00000150907	145.054	331.698	-1.19257	0.000607828	0.00506175	FOXO1
ENSG00000139567	904.045	2065.42	-1.19189	6.6051e-06	0.000104018	ACVRL1
ENSG00000109794	116.839	265.116	-1.18393	1.03678e-08	3.09631e-07	FAM149A
ENSG00000172572	112.365	255.255	-1.18255	0.000498744	0.00430487	PDE3A
ENSG00000121957	230.914	522.836	-1.17815	0.000704598	0.00573905	GPSM2
ENSG00000135472	284.42	641.217	-1.17239	0.0011926	0.0089216	FAIM2
ENSG00000243244	94.7151	213.725	-1.17221	0.000191454	0.00194055	STON1
ENSG00000169515	217.899	490.971	-1.17177	2.44401e-09	8.60943e-08	CCDC8
ENSG00000257151	21.2341	48.0905	-1.17099	9.03224e-05	0.00102031	PWAR6
ENSG00000048740	807.215	1812.54	-1.1665	2.67496e-09	9.32832e-08	CELF2
ENSG00000182685	37.5233	83.5469	-1.16321	0.000149505	0.00156724	BRICD5
ENSG00000143867	231.252	517.136	-1.162	7.33027e-06	0.000114228	OSR1
ENSG00000169760	142.605	318.269	-1.15975	5.37374e-05	0.000657321	NLGN1
ENSG00000128016	466.956	1039.28	-1.15481	5.19963e-06	8.42461e-05	ZFP36
ENSG00000120913	669.57	1488.05	-1.15271	3.02908e-10	1.24876e-08	PDLIM2
ENSG00000131634	331.823	735.611	-1.14744	1.00425e-09	3.78758e-08	TMEM204
ENSG00000166816	35.7208	78.6673	-1.14314	0.000154372	0.0016125	LDHD
ENSG00000151276	416.016	918.32	-1.14216	4.33654e-10	1.72955e-08	MAGI1
ENSG00000140961	230.033	506.61	-1.13979	1.98572e-06	3.59484e-05	OSGIN1
ENSG00000109654	950.33	2093.43	-1.13935	4.56438e-19	6.17051e-17	TRIM2
ENSG00000153048	322.515	708.137	-1.134	1.34246e-07	3.2348e-06	CARHSP1
ENSG00000283175	22.3496	48.8693	-1.12938	0.000205303	0.00205589	AC007920.2
ENSG00000152642	90.9211	198.541	-1.1286	6.24579e-17	6.37408e-15	GPD1L
ENSG00000081923	1032.3	2246.81	-1.12198	1.87969e-05	0.00026264	ATP8B1
ENSG00000130005	252.858	549.919	-1.11937	3.41281e-09	1.15908e-07	GAMT
ENSG00000177595	356.242	772.259	-1.11613	6.16622e-05	0.000742049	PIDD1
ENSG00000266010	37.4353	81.1147	-1.11593	0.000201803	0.00202572	GATA6-AS1
ENSG00000250451	19.5587	41.9185	-1.11523	0.00129104	0.00951425	HOXC-AS1
ENSG00000161281	154.617	334.641	-1.11438	6.71548e-12	3.53586e-10	COX7A1
ENSG00000104490	207.491	448.457	-1.11162	0.000128299	0.00137048	NCALD
ENSG00000279267	27.8512	60.2176	-1.10754	6.39967e-07	1.30751e-05	AL078621.3
ENSG00000111077	1252.5	2696.47	-1.10655	3.53457e-14	2.49445e-12	TNS2
ENSG00000174804	531.141	1140.72	-1.10316	1.0727e-06	2.09892e-05	FZD4
ENSG00000159640	488.74	1048.3	-1.10092	0.000450768	0.00396474	ACE
ENSG00000169239	139.717	299.605	-1.10046	6.916e-11	3.14376e-09	CA5B
ENSG00000133056	105.294	225.172	-1.09678	0.00102536	0.00786839	PIK3C2B
ENSG00000124496	256.62	548.844	-1.09657	7.84933e-05	0.000904345	TRERF1
ENSG00000145362	738.214	1576.43	-1.09477	4.11783e-08	1.10476e-06	ANK2
ENSG00000231991	738.606	1576.74	-1.09458	1.12647e-05	0.000166918	ANXA2P2
ENSG00000246090	58.0202	123.153	-1.08921	0.000627019	0.00519455	AP002026.1
ENSG00000226686	14.3458	30.4773	-1.0868	0.0010887	0.0082782	LINC01535
ENSG00000280351	14.9184	31.7107	-1.08617	0.00036938	0.00335813	AC127496.7
ENSG00000147576	19.8605	42.3215	-1.08616	0.000402766	0.00360808	ADHFE1
ENSG00000026025	27034.1	57334.1	-1.08462	1.19744e-10	5.18285e-09	VIM
ENSG00000242732	292.675	620.632	-1.0841	2.07161e-16	1.97839e-14	RTL5
ENSG00000118495	625.355	1324.11	-1.08238	1.60972e-06	2.99221e-05	PLAGL1
ENSG00000156103	85.8958	182.17	-1.0819	0.00117681	0.00881295	MMP16
ENSG00000071967	11037.7	23363.5	-1.0818	5.13099e-09	1.64849e-07	CYBRD1
ENSG00000122545	2592.01	5479.8	-1.08005	4.9155e-13	3.04571e-11	2007-09-01
ENSG00000042493	578.957	1224.07	-1.08003	5.86849e-08	1.53488e-06	CAPG
ENSG00000124151	1308.94	2765.78	-1.07922	4.42968e-18	5.30008e-16	NCOA3
ENSG00000142156	54092.6	113925	-1.07458	4.92822e-06	8.05974e-05	COL6A1
ENSG00000198756	45.5148	95.8773	-1.07362	9.83653e-08	2.42351e-06	COLGALT2
ENSG00000233016	467.383	983.607	-1.07246	6.22549e-21	1.01257e-18	SNHG7
ENSG00000181804	137.144	288.456	-1.07198	0.000379622	0.00343773	SLC9A9
ENSG00000163071	574.604	1207.02	-1.07068	3.19727e-09	1.0948e-07	SPATA18
ENSG00000135736	203.372	427.466	-1.0698	1.05166e-16	1.03766e-14	CCDC102A
ENSG00000186364	23.3276	48.9006	-1.06801	0.000532042	0.00454331	NUDT17
ENSG00000235944	19.8159	41.5427	-1.06687	0.000221128	0.00217731	ZNF815P
ENSG00000105245	547.182	1145.7	-1.06606	7.41929e-17	7.42607e-15	NUMBL
ENSG00000106789	29.0814	61.0424	-1.06585	0.000662657	0.00543572	CORO2A
ENSG00000089847	27.3605	57.2368	-1.06279	0.000611203	0.00508172	ANKRD24
ENSG00000182511	137.237	286.256	-1.061	0.000194933	0.00197006	FES
ENSG00000177694	239.96	500.579	-1.06061	2.13638e-07	4.8769e-06	NAALADL2
ENSG00000255031	25.2426	52.4318	-1.0518	8.09887e-05	0.000931549	AP002807.1
ENSG00000103056	18.3584	37.9086	-1.05151	0.000373238	0.00338729	SMPD3
ENSG00000136002	174.432	361.05	-1.04997	4.37927e-09	1.42877e-07	ARHGEF4
ENSG00000153064	34.5438	71.6156	-1.04948	1.17408e-05	0.000172377	BANK1
ENSG00000130997	25.1132	51.9659	-1.04863	0.000922723	0.00721373	POLN
ENSG00000169439	1877.17	3882.23	-1.04835	1.17079e-06	2.26109e-05	SDC2
ENSG00000169231	345.524	714.294	-1.04827	0.000215846	0.00213723	THBS3
ENSG00000109610	2336.06	4816.4	-1.04375	5.24672e-05	0.000644433	SOD3
ENSG00000187091	316.997	653.282	-1.04318	1.27764e-29	3.59448e-27	PLCD1
ENSG00000104936	736.86	1515.25	-1.04038	1.66473e-14	1.25119e-12	DMPK
ENSG00000235098	36.6264	74.8024	-1.03587	5.94362e-06	9.46749e-05	ANKRD65
ENSG00000123096	372.413	761.098	-1.03133	0.00122734	0.00913548	SSPN
ENSG00000105672	16.4287	33.418	-1.02688	0.000845846	0.00667539	ETV2
ENSG00000147394	26.0845	52.6659	-1.02262	0.000382736	0.00345691	ZNF185
ENSG00000198720	140.333	284.79	-1.02106	4.38529e-09	1.42877e-07	ANKRD13B
ENSG00000178209	13926.9	28206.8	-1.01819	1.72677e-09	6.32917e-08	PLEC
ENSG00000136114	157.14	316.983	-1.0122	6.25613e-07	1.28195e-05	THSD1
ENSG00000241852	148.601	299.226	-1.01158	2.52695e-06	4.46971e-05	C8orf58
ENSG00000272455	16.2618	32.9202	-1.01147	0.00110676	0.0083903	AL391244.3
ENSG00000148737	618.399	1245.83	-1.0108	0.00011521	0.0012499	TCF7L2
ENSG00000150764	438.301	882.204	-1.00805	2.35112e-07	5.30314e-06	DIXDC1
ENSG00000122707	3637.12	7312.23	-1.00755	9.06665e-09	2.72773e-07	RECK
ENSG00000140398	64.3269	128.761	-1.00407	0.000206533	0.00206623	NEIL1
ENSG00000119943	238.35	477.436	-1.00321	9.44946e-06	0.000143807	PYROXD2
ENSG00000213722	1293.45	2590.91	-1.00243	1.05413e-06	2.06452e-05	DDAH2
ENSG00000182718	12627.1	25263.7	-1.00058	2.35649e-05	0.000321072	ANXA2
ENSG00000215861	317.951	158.937	1.00047	3.16589e-05	0.000413513	AC245297.1
ENSG00000087253	1471.6	734.68	1.00262	0.000551082	0.00467331	LPCAT2
ENSG00000178752	123.23	61.4162	1.00278	0.000535608	0.00457001	ERFE
ENSG00000189362	154.782	77.2835	1.00346	0.000302508	0.0028433	NEMP2
ENSG00000142871	20373.1	10151.8	1.00491	2.48925e-05	0.000336955	CYR61
ENSG00000163605	1839.32	915.601	1.0063	1.77135e-32	5.8536e-30	PPP4R2
ENSG00000143158	813.882	404.902	1.00736	2.65808e-07	5.91856e-06	MPC2
ENSG00000164604	146.093	72.7268	1.00895	2.1814e-07	4.95792e-06	GPR85
ENSG00000183765	318.882	158.46	1.0097	6.37006e-06	0.00010085	CHEK2
ENSG00000232187	331.301	164.644	1.01041	0.000992478	0.00764708	FTH1P7
ENSG00000011478	492.062	243.999	1.01246	7.75721e-05	0.000897114	QPCTL
ENSG00000140285	8219.87	4070.91	1.01377	4.11083e-11	1.93627e-09	FGF7
ENSG00000138495	259.821	128.308	1.01502	3.85154e-07	8.20728e-06	COX17
ENSG00000023608	592.873	292.087	1.02123	7.7602e-09	2.38288e-07	SNAPC1
ENSG00000107020	257.797	126.954	1.0236	0.000410984	0.00366974	PLGRKT
ENSG00000183696	427.849	210.122	1.02451	2.27821e-05	0.000311426	UPP1
ENSG00000223396	50.999	25.1596	1.02464	2.80894e-06	4.90598e-05	RPS10P7
ENSG00000171223	1102.97	540.919	1.02821	7.24457e-09	2.235e-07	JUNB
ENSG00000259207	815.858	400.163	1.02833	2.08363e-05	0.000288617	ITGB3
ENSG00000122729	6423.47	3148.39	1.02884	3.83775e-09	1.27633e-07	ACO1
ENSG00000139618	294.938	144.323	1.03062	2.00423e-07	4.63107e-06	BRCA2
ENSG00000169554	4634.59	2264.82	1.03313	3.50335e-12	1.9554e-10	ZEB2
ENSG00000139278	1442.69	704.828	1.03374	1.44749e-06	2.72718e-05	GLIPR1
ENSG00000166741	6783.9	3311.78	1.03445	1.92181e-09	6.95828e-08	NNMT
ENSG00000120318	407.521	198.738	1.03547	2.60853e-06	4.60229e-05	ARAP3
ENSG00000164342	295.76	144.005	1.03834	0.00119486	0.00892949	TLR3
ENSG00000004864	313.844	151.844	1.04445	8.16148e-15	6.48527e-13	SLC25A13
ENSG00000182463	1623.5	786.53	1.04572	8.88037e-05	0.00100424	TSHZ2
ENSG00000179630	8388.79	4061.95	1.04631	1.94465e-10	8.24554e-09	LACC1
ENSG00000049759	268.397	129.929	1.04838	0.000609247	0.00506951	NEDD4L
ENSG00000086289	3234.65	1561.2	1.051	1.55608e-08	4.4746e-07	EPDR1
ENSG00000103489	2150.44	1035.24	1.05502	3.67008e-08	1.00161e-06	XYLT1
ENSG00000167703	976.344	469.833	1.05542	1.98827e-05	0.000276512	SLC43A2
ENSG00000164307	1765.41	849.148	1.05637	8.54949e-32	2.61753e-29	ERAP1
ENSG00000168237	80.3031	38.5279	1.0605	1.11472e-06	2.16689e-05	GLYCTK
ENSG00000100342	2582.7	1235.73	1.06339	0.000249762	0.00241401	APOL1
ENSG00000170006	299.643	143.309	1.06384	1.93014e-11	9.45498e-10	TMEM154
ENSG00000082641	24825.8	11871.4	1.0644	1.25209e-40	6.35786e-38	NFE2L1
ENSG00000157227	48792	23311.9	1.06559	0.000108709	0.00119179	MMP14
ENSG00000180884	70.1302	33.5422	1.07033	2.75435e-05	0.000367818	ZNF792
ENSG00000149428	3769.26	1788.09	1.07572	1.90953e-17	2.09235e-15	HYOU1
ENSG00000153976	294.32	139.676	1.07665	8.6021e-05	0.000980762	HS3ST3A1
ENSG00000127824	180.444	85.6845	1.07782	2.20105e-05	0.000302267	TUBA4A
ENSG00000105829	805.227	381.489	1.07816	6.29486e-05	0.000754477	BET1
ENSG00000244026	451.213	213.803	1.079	0.000272748	0.00260714	FAM86DP
ENSG00000180801	816.489	386.386	1.07984	3.05848e-08	8.40033e-07	ARSJ
ENSG00000108219	2362.09	1115.68	1.08216	9.9564e-08	2.45015e-06	TSPAN14
ENSG00000173193	1776.21	837.49	1.08444	1.13482e-05	0.000167797	PARP14
ENSG00000116771	42.1176	19.9265	1.08469	0.000102549	0.00113442	AGMAT
ENSG00000185507	312.924	147.299	1.08625	0.000567995	0.00478555	IRF7
ENSG00000164823	1108.01	521.577	1.0873	1.39855e-06	2.64454e-05	OSGIN2
ENSG00000152223	3690.54	1733.36	1.09039	5.84862e-05	0.00070751	EPG5
ENSG00000167604	94.883	44.5204	1.09112	4.22519e-06	7.0091e-05	NFKBID
ENSG00000148834	2567.89	1204.84	1.0919	7.71233e-06	0.000119645	GSTO1
ENSG00000091039	10531.9	4927.84	1.09586	3.73031e-20	5.71039e-18	OSBPL8
ENSG00000198355	943.422	440.8	1.09718	1.34213e-14	1.03106e-12	PIM3
ENSG00000136026	11956.2	5585.76	1.09791	8.29143e-21	1.32784e-18	CKAP4
ENSG00000144959	779.482	364.191	1.0983	8.99426e-20	1.30945e-17	NCEH1
ENSG00000114784	1542.71	720.258	1.09861	5.8002e-18	6.82228e-16	EIF1B
ENSG00000160606	180.39	83.7724	1.10627	3.11098e-10	1.27746e-08	TLCD1
ENSG00000128590	1278.05	593.594	1.10684	5.97629e-11	2.74054e-09	DNAJB9
ENSG00000223901	126.108	58.6408	1.1076	0.00109304	0.00830739	AP001469.1
ENSG00000181381	1779.88	823.1	1.11259	5.18282e-05	0.000638175	DDX60L
ENSG00000117394	1128.88	520.121	1.11806	0.000748191	0.00603744	SLC2A1
ENSG00000138018	935.581	430.954	1.11836	6.60885e-13	4.03489e-11	SELENOI
ENSG00000099250	13637	6262.78	1.12268	3.7824e-06	6.36073e-05	NRP1
ENSG00000110080	849.365	389.224	1.12628	8.65939e-06	0.000132852	ST3GAL4
ENSG00000138696	161.788	74.1683	1.12667	0.00106032	0.00809489	BMPR1B
ENSG00000163637	647.09	296.243	1.12793	4.49697e-05	0.000564671	PRICKLE2
ENSG00000215158	36.7815	16.7497	1.12901	0.000118829	0.00128115	AC138409.2
ENSG00000133687	3220.91	1471.96	1.12967	1.80399e-09	6.56594e-08	TMTC1
ENSG00000182541	870.052	397.616	1.13018	0.000774635	0.00621948	LIMK2
ENSG00000197142	311.487	142.065	1.13134	4.49496e-06	7.39768e-05	ACSL5
ENSG00000279881	36.8586	16.798	1.13213	0.000593296	0.0049694	AC041040.1
ENSG00000197081	18041.2	8230.61	1.13226	1.53041e-15	1.3166e-13	IGF2R
ENSG00000188313	663.42	302.508	1.13248	0.000173032	0.00177941	PLSCR1
ENSG00000102359	1967.04	896.917	1.13318	7.56731e-05	0.000880028	SRPX2
ENSG00000196787	40.6666	18.6043	1.13929	8.75838e-05	0.000993683	HIST1H2AG
ENSG00000148841	2493.64	1131.61	1.14004	0.000162518	0.00168499	ITPRIP
ENSG00000169122	1274.72	578.37	1.14018	1.4915e-07	3.55688e-06	FAM110B
ENSG00000099284	525.741	238.233	1.14237	1.05363e-08	3.12517e-07	H2AFY2
ENSG00000108582	6394.45	2895.55	1.14307	2.0982e-22	3.8318e-20	CPD
ENSG00000010818	2199.12	995.507	1.14385	1.05914e-08	3.13659e-07	HIVEP2
ENSG00000150630	2118.52	958.561	1.14404	1.28372e-12	7.49267e-11	VEGFC
ENSG00000145779	948.771	429.238	1.14447	2.48227e-06	4.40566e-05	TNFAIP8
ENSG00000091073	587.686	265.435	1.14497	5.80006e-15	4.66221e-13	DTX2
ENSG00000224687	41.4863	18.7922	1.14816	0.000120707	0.00129804	RASAL2-AS1
ENSG00000176463	1171.04	528.262	1.14908	3.54055e-09	1.19466e-07	SLCO3A1
ENSG00000256073	57.2505	25.8573	1.15379	8.36845e-06	0.000128768	URB1-AS1
ENSG00000240065	374.95	168.323	1.1548	2.43936e-06	4.3406e-05	PSMB9
ENSG00000175040	788.034	353.94	1.15495	3.12456e-05	0.000409894	CHST2
ENSG00000141526	2466.02	1106.07	1.15675	0.000222486	0.00218487	SLC16A3
ENSG00000002549	2119.03	949.121	1.15854	1.13877e-05	0.000168262	LAP3
ENSG00000156804	2072.07	925.782	1.16258	0.000652653	0.00537696	FBXO32
ENSG00000086062	10525	4701.07	1.16275	3.58256e-10	1.45674e-08	B4GALT1
ENSG00000111817	6333.32	2801.72	1.17668	6.33178e-20	9.48354e-18	DSE
ENSG00000131724	2415.62	1068.03	1.17772	3.5138e-22	6.25247e-20	IL13RA1
ENSG00000175505	394.958	174.028	1.18055	1.07807e-12	6.39441e-11	CLCF1
ENSG00000105185	1258.96	555.264	1.18065	1.98179e-18	2.47059e-16	PDCD5
ENSG00000116016	13271.7	5853.91	1.1809	6.89751e-06	0.000108295	EPAS1
ENSG00000143162	6911.82	3048.53	1.18101	4.4222e-05	0.000556962	CREG1
ENSG00000177989	197.256	86.71	1.18357	6.35528e-06	0.000100693	ODF3B
ENSG00000178607	1102.08	485.103	1.18491	5.3405e-15	4.30945e-13	ERN1
ENSG00000169855	2984.82	1311.22	1.18706	2.54773e-09	8.94455e-08	ROBO1
ENSG00000196352	2911.7	1278.32	1.18757	2.11663e-12	1.20399e-10	CD55
ENSG00000060982	7985.36	3505.15	1.188	2.71955e-32	8.84662e-30	BCAT1
ENSG00000162645	821.457	358.792	1.19515	9.53608e-05	0.00106967	GBP2
ENSG00000219507	242.823	105.836	1.19925	4.47448e-07	9.45728e-06	FTH1P8
ENSG00000183963	2429.95	1055.28	1.20335	2.75668e-07	6.125e-06	SMTN
ENSG00000101000	1406.33	609.9	1.2056	0.0010229	0.00785238	PROCR
ENSG00000213222	215.734	93.6101	1.20698	7.17341e-06	0.00011212	AC093724.1
ENSG00000134250	21005.2	9095.17	1.20761	3.13395e-06	5.37445e-05	NOTCH2
ENSG00000137124	1232.88	532.962	1.20992	1.57973e-06	2.94699e-05	ALDH1B1
ENSG00000219693	17.5615	7.56435	1.21166	0.00132675	0.00971564	FGF7P8
ENSG00000125430	497.915	214.675	1.21351	8.00045e-11	3.59744e-09	HS3ST3B1
ENSG00000169330	112.075	48.2775	1.21393	0.000141911	0.00150048	KIAA1024
ENSG00000106799	4701.19	2022.37	1.21697	2.75489e-14	1.98457e-12	TGFBR1
ENSG00000039560	3918.51	1684.81	1.21774	6.95493e-13	4.23376e-11	RAI14
ENSG00000279198	52.1072	22.4432	1.21813	0.000168867	0.00174387	AC008894.3
ENSG00000126767	1957.37	841.003	1.21891	6.22762e-17	6.37408e-15	ELK1
ENSG00000156313	135.523	58.1694	1.21896	1.07567e-09	4.02777e-08	RPGR
ENSG00000149485	18843.7	8093.93	1.21918	4.16959e-09	1.37352e-07	FADS1
ENSG00000166562	326.638	140.218	1.22111	8.29414e-05	0.000950858	SEC11C
ENSG00000165661	1096.8	469.305	1.2244	1.05138e-29	3.0401e-27	QSOX2
ENSG00000221949	45.4333	19.2364	1.22532	0.000303359	0.00285001	LINC01465
ENSG00000164603	872.64	373.21	1.22591	6.0381e-10	2.36292e-08	BMT2
ENSG00000185070	8873.63	3789.17	1.22766	8.5229e-11	3.79141e-09	FLRT2
ENSG00000174705	7368.43	3142.23	1.22969	3.64936e-09	1.22542e-07	SH3PXD2B
ENSG00000103226	631.596	269.273	1.23008	0.000552922	0.00468509	NOMO3
ENSG00000060642	768.894	327.502	1.2327	5.81934e-25	1.19953e-22	PIGV
ENSG00000264343	83.6348	35.4835	1.24155	0.00126084	0.00932484	NOTCH2NLA
ENSG00000251442	44.4984	18.7834	1.24288	0.000212036	0.00210911	LINC01094
ENSG00000151883	195.061	82.3495	1.2446	0.000318472	0.00297722	PARP8
ENSG00000119640	100.267	42.2717	1.24549	1.72099e-08	4.92161e-07	ACYP1
ENSG00000137266	1739.49	732.304	1.24839	2.30647e-07	5.21939e-06	SLC22A23
ENSG00000229689	47.7233	20.1289	1.25315	2.16785e-05	0.000298693	AC009237.3
ENSG00000182957	660.695	276.813	1.25491	6.94581e-05	0.000816515	SPATA13
ENSG00000101888	275.018	115.338	1.25542	3.14908e-12	1.76714e-10	NXT2
ENSG00000187134	5576.87	2336.01	1.25548	0.000212399	0.00211172	AKR1C1
ENSG00000168394	1465.77	613.488	1.25622	1.37078e-19	1.96815e-17	TAP1
ENSG00000145147	5272.29	2206.19	1.25684	5.94818e-11	2.73367e-09	SLIT2
ENSG00000171388	70.3381	29.514	1.25872	0.000168712	0.00174314	APLN
ENSG00000130513	3766.31	1569.54	1.26267	2.76749e-08	7.67196e-07	GDF15
ENSG00000233901	297.551	123.924	1.26379	2.20863e-09	7.84666e-08	LINC01503
ENSG00000111670	4450.82	1850.68	1.26621	8.22803e-08	2.07636e-06	GNPTAB
ENSG00000197965	7129.17	2961.28	1.26754	3.41915e-10	1.39849e-08	MPZL1
ENSG00000228649	98.6896	40.8698	1.26817	3.49953e-06	5.94264e-05	SNHG26
ENSG00000140526	4252.94	1765.63	1.26841	0.000469466	0.00409461	ABHD2
ENSG00000231925	5356.05	2223.01	1.26854	1.63126e-38	7.54693e-36	TAPBP
ENSG00000137573	33920.9	14073.3	1.26922	4.85223e-05	0.000602017	SULF1
ENSG00000232389	26.2984	10.8323	1.27935	4.28694e-05	0.000542222	AL583856.1
ENSG00000240859	124.338	50.909	1.29099	0.000621503	0.00515296	AC093627.4
ENSG00000100911	1289.4	526.053	1.29293	1.44234e-24	2.88732e-22	PSME2
ENSG00000204267	687.818	279.473	1.29845	2.27131e-14	1.65918e-12	TAP2
ENSG00000078098	9590.3	3897.66	1.29903	8.1326e-05	0.000934912	FAP
ENSG00000149571	300.466	121.307	1.30633	1.67234e-06	3.08931e-05	KIRREL3
ENSG00000234975	436.238	176.294	1.30819	3.7326e-05	0.000480872	FTH1P2
ENSG00000129667	229.968	92.9082	1.30897	5.43603e-05	0.000662604	RHBDF2
ENSG00000171444	1229.41	494.472	1.31469	6.51834e-19	8.69906e-17	MCC
ENSG00000184792	122.728	49.3612	1.31693	9.3317e-05	0.00105014	OSBP2
ENSG00000158019	935.542	375.212	1.3177	4.63403e-09	1.5004e-07	BABAM2
ENSG00000143067	502.618	201.655	1.31839	1.11698e-11	5.67179e-10	ZNF697
ENSG00000097007	11019.6	4417.53	1.31889	4.62655e-25	9.7293e-23	ABL1
ENSG00000109320	2957.47	1185.62	1.31898	1.97491e-42	1.11124e-39	NFKB1
ENSG00000115652	1888.51	755.133	1.32264	9.4054e-23	1.74831e-20	UXS1
ENSG00000106034	2342.01	933.831	1.32682	4.67975e-05	0.000583749	CPED1
ENSG00000006327	3010.19	1195.73	1.33185	1.63775e-05	0.000231632	TNFRSF12A
ENSG00000130589	1213.19	480.283	1.33655	8.75293e-07	1.74547e-05	HELZ2
ENSG00000139146	210.222	83.1393	1.33696	2.10932e-07	4.84168e-06	SINHCAF
ENSG00000075426	4980.75	1969.87	1.33826	2.75693e-19	3.80109e-17	FOSL2
ENSG00000166450	69.9879	27.7415	1.33982	8.81129e-07	1.75375e-05	PRTG
ENSG00000243444	49.3917	19.4843	1.34138	0.000110531	0.00120795	PALM2
ENSG00000154640	793.041	312.175	1.3442	3.85009e-12	2.14318e-10	BTG3
ENSG00000107562	13121	5163.01	1.34561	5.11158e-06	8.32041e-05	CXCL12
ENSG00000107968	624.558	245.51	1.34683	8.56405e-08	2.15332e-06	MAP3K8
ENSG00000251034	60.4394	23.8506	1.35036	6.2401e-06	9.90188e-05	AC037459.2
ENSG00000184557	734.96	288.163	1.35102	7.68751e-08	1.94941e-06	SOCS3
ENSG00000164465	1042.76	407.2	1.3569	3.66404e-07	7.86409e-06	DCBLD1
ENSG00000236255	96.0369	37.5436	1.3612	1.99107e-07	4.6058e-06	AC009404.1
ENSG00000116106	1015.08	394.416	1.36327	9.14881e-06	0.000139721	EPHA4
ENSG00000148848	17554.3	6822.2	1.36349	7.01082e-07	1.41983e-05	ADAM12
ENSG00000205220	308.469	119.564	1.36449	6.86354e-17	6.90299e-15	PSMB10
ENSG00000152990	1142.85	443.958	1.36497	4.85549e-17	5.05433e-15	ADGRA3
ENSG00000015475	723.11	280.372	1.36703	2.25977e-22	4.09097e-20	BID
ENSG00000143013	2324.05	898.022	1.37192	3.67404e-22	6.4822e-20	LMO4
ENSG00000138386	1608.84	620.51	1.375	1.69196e-12	9.73064e-11	NAB1
ENSG00000168542	386973	148892	1.37796	3.29942e-09	1.12608e-07	COL3A1
ENSG00000103522	253.336	97.4276	1.37824	3.09341e-07	6.72954e-06	IL21R
ENSG00000159216	5086.97	1953.78	1.38064	1.96807e-13	1.27643e-11	RUNX1
ENSG00000087245	143860	55238	1.38094	6.54703e-08	1.69531e-06	MMP2
ENSG00000027075	38.6119	14.8699	1.38273	0.000348205	0.00320339	PRKCH
ENSG00000137628	580.363	222.196	1.38482	3.71098e-06	6.27101e-05	DDX60
ENSG00000104312	906.411	347.082	1.38533	1.21622e-13	8.06385e-12	RIPK2
ENSG00000114251	3333.89	1275.32	1.3864	0.000546266	0.00463814	WNT5A
ENSG00000170525	1129.24	431.817	1.38757	7.64103e-13	4.61097e-11	PFKFB3
ENSG00000068079	724.732	276.678	1.3885	2.84171e-06	4.95905e-05	IFI35
ENSG00000106829	889.92	339.837	1.38942	8.67268e-08	2.17015e-06	TLE4
ENSG00000230417	81.1251	30.9165	1.39111	0.000183283	0.00187048	LINC00856
ENSG00000083799	2046.82	778.797	1.39439	5.64939e-07	1.1738e-05	CYLD
ENSG00000072682	4336.78	1649.57	1.39441	2.70453e-19	3.75371e-17	P4HA2
ENSG00000233058	40.4826	15.4947	1.39482	0.000116613	0.00126052	LINC00884
ENSG00000075420	10974.9	4136.14	1.40789	1.84765e-47	1.47947e-44	FNDC3B
ENSG00000224536	33.6891	12.5509	1.40835	0.000404869	0.00362536	AC096677.1
ENSG00000088826	578.491	217.912	1.40932	6.77985e-09	2.10357e-07	SMOX
ENSG00000140057	73.5169	27.4622	1.41022	1.22282e-06	2.35286e-05	AK7
ENSG00000197442	358.654	135.032	1.41104	5.86676e-07	1.21422e-05	MAP3K5
ENSG00000167995	473.382	177.54	1.41526	2.58185e-14	1.86637e-12	BEST1
ENSG00000125675	568.162	212.485	1.42029	3.70928e-08	1.01078e-06	GRIA3
ENSG00000213190	495.91	184.904	1.42386	0.000605626	0.00504745	MLLT11
ENSG00000226124	55.9888	20.7681	1.42424	0.000756579	0.00609331	FTCDNL1
ENSG00000205562	40.9518	15.2923	1.42444	7.63225e-07	1.5382e-05	AL049775.1
ENSG00000086619	328.958	122.375	1.42899	4.60146e-14	3.19326e-12	ERO1B
ENSG00000134851	4807.54	1781.36	1.43205	1.12026e-43	6.85962e-41	TMEM165
ENSG00000133121	1518.55	562.637	1.43309	1.35712e-12	7.87191e-11	STARD13
ENSG00000146232	297.195	110.123	1.43405	1.51695e-17	1.67986e-15	NFKBIE
ENSG00000163638	84.6093	31.3594	1.43477	0.000123462	0.00132357	ADAMTS9
ENSG00000136720	3143.93	1161.01	1.43709	1.62111e-07	3.83087e-06	HS6ST1
ENSG00000115594	10342.3	3817.64	1.43785	2.06214e-07	4.75434e-06	IL1R1
ENSG00000095209	811.41	299.292	1.43957	5.96765e-07	1.2301e-05	TMEM38B
ENSG00000157193	958.66	352.194	1.44484	1.82615e-05	0.000256017	LRP8
ENSG00000233621	137.115	50.1667	1.45004	1.49326e-05	0.000213665	LINC01137
ENSG00000204103	538.079	196.497	1.45323	3.14641e-05	0.0004125	MAFB
ENSG00000167996	123109	44890.4	1.45546	9.45487e-08	2.33846e-06	FTH1
ENSG00000135048	1783.93	650.077	1.45661	5.78858e-13	3.57604e-11	CEMIP2
ENSG00000141682	66.8583	24.4554	1.45699	1.29282e-05	0.000188087	PMAIP1
ENSG00000232818	26.3966	9.58457	1.45927	0.000221833	0.00218155	RPS2P32
ENSG00000160326	2704.43	983.106	1.45993	8.62445e-11	3.82026e-09	SLC2A6
ENSG00000070961	14953.9	5418.63	1.46455	9.1412e-13	5.4687e-11	ATP2B1
ENSG00000222041	1407.91	509.523	1.466	8.40562e-15	6.65386e-13	CYTOR
ENSG00000117676	19.4299	6.95714	1.47943	0.000508414	0.00437926	RPS6KA1
ENSG00000169594	755.748	271.212	1.47952	4.78157e-18	5.68843e-16	BNC1
ENSG00000130066	2275.95	814.52	1.48268	3.26961e-06	5.58866e-05	SAT1
ENSG00000049323	1819.2	650.463	1.48388	0.00134904	0.00984771	LTBP1
ENSG00000280721	36.0807	12.963	1.4851	0.000127069	0.00135873	LINC01943
ENSG00000135976	216.259	77.3302	1.48662	4.53894e-05	0.000569132	ANKRD36
ENSG00000100902	84.2422	30.0878	1.48735	7.28818e-14	4.95858e-12	PSMA6
ENSG00000120910	904.025	322.249	1.48869	2.0351e-15	1.72934e-13	PPP3CC
ENSG00000171310	1139.28	405.772	1.49005	2.43834e-15	2.04693e-13	CHST11
ENSG00000270607	58.6432	20.925	1.49302	0.000432714	0.00383021	AC009549.1
ENSG00000145365	193.623	68.7596	1.49613	5.26794e-12	2.82663e-10	TIFA
ENSG00000059378	658.209	232.837	1.49874	1.77113e-14	1.32637e-12	PARP12
ENSG00000175592	1497.2	529.618	1.49937	6.80329e-06	0.000106977	FOSL1
ENSG00000198018	740.197	261.55	1.50129	1.70281e-07	4.00574e-06	ENTPD7
ENSG00000115267	347.822	122.631	1.50446	1.42375e-05	0.000205698	IFIH1
ENSG00000234745	7584.55	2672.48	1.50486	7.96308e-09	2.43799e-07	HLA-B
ENSG00000105889	38.2908	13.4655	1.51007	4.34283e-05	0.00054796	STEAP1B
ENSG00000074370	69.9883	24.4381	1.51055	0.00125945	0.00931785	ATP2A3
ENSG00000166387	997.579	349.562	1.51251	8.28387e-10	3.16444e-08	PPFIBP2
ENSG00000260101	18.902	6.71475	1.51374	0.000262009	0.00251836	AC008074.2
ENSG00000254087	384.846	134.422	1.51838	3.69752e-11	1.74952e-09	LYN
ENSG00000189001	749.476	261.361	1.52012	0.000565756	0.00477248	SBSN
ENSG00000145623	13470.8	4677.24	1.52615	4.67259e-33	1.62131e-30	OSMR
ENSG00000226312	19.823	6.94277	1.52656	0.00056501	0.00477005	CFLAR-AS1
ENSG00000150510	46.7996	16.1912	1.53333	3.3424e-05	0.000435181	FAM124A
ENSG00000163738	110.652	38.1627	1.53893	1.22529e-07	2.96965e-06	MTHFD2L
ENSG00000121104	423.35	145.539	1.53992	8.86903e-14	5.97554e-12	FAM117A
ENSG00000221869	2859.99	982.276	1.54152	1.76056e-12	1.00973e-10	CEBPD
ENSG00000112183	207.871	71.1819	1.5459	7.18164e-08	1.84131e-06	RBM24
ENSG00000174939	81.2011	27.8026	1.54805	0.000226068	0.00221483	ASPHD1
ENSG00000019582	34.8665	11.9736	1.54898	0.000456647	0.00400292	CD74
ENSG00000134259	1541.68	526.737	1.54906	7.52524e-08	1.91292e-06	NGF
ENSG00000197635	15959.8	5445.04	1.55146	7.84867e-08	1.98303e-06	DPP4
ENSG00000183840	40.7784	13.9042	1.55441	0.000386499	0.00348335	GPR39
ENSG00000224596	87.6405	29.8175	1.55721	8.7096e-05	0.000989766	ZMIZ1-AS1
ENSG00000170485	818.883	277.667	1.56099	2.20674e-05	0.000302848	NPAS2
ENSG00000054967	94.1047	31.9626	1.56159	2.92635e-07	6.44014e-06	RELT
ENSG00000259436	13.7371	4.68909	1.56636	0.000575512	0.00484104	AC010247.2
ENSG00000185022	2251.56	755.651	1.57534	1.11269e-07	2.71891e-06	MAFF
ENSG00000135424	2104.63	706.048	1.57543	9.30301e-12	4.80594e-10	ITGA7
ENSG00000117479	592.861	198.909	1.57636	6.70931e-10	2.60599e-08	SLC19A2
ENSG00000163694	116.81	39.1571	1.57637	9.38198e-05	0.00105466	RBM47
ENSG00000234380	98.1118	32.6697	1.5859	8.13296e-09	2.47906e-07	LINC01426
ENSG00000185215	9085.77	3019.9	1.58919	3.01402e-16	2.78884e-14	TNFAIP2
ENSG00000161249	2512.17	834.458	1.59004	3.46254e-06	5.88463e-05	DMKN
ENSG00000049192	619.234	205.847	1.59039	4.08236e-10	1.63758e-08	ADAMTS6
ENSG00000170385	4126.16	1369.46	1.59129	2.29685e-42	1.25837e-39	SLC30A1
ENSG00000113555	57.2194	18.8506	1.60234	3.92968e-05	0.000503149	PCDH12
ENSG00000110218	1637.04	538.782	1.60327	2.55601e-23	4.97324e-21	PANX1
ENSG00000198053	7700.39	2532.08	1.60472	3.93715e-20	5.98303e-18	SIRPA
ENSG00000253958	72.1405	23.6525	1.60812	0.000334882	0.00310139	CLDN23
ENSG00000149289	883.302	288.964	1.61308	1.43119e-11	7.11121e-10	ZC3H12C
ENSG00000233452	111.888	36.5568	1.61708	0.000172362	0.0017738	STXBP5-AS1
ENSG00000162618	2068.92	668.344	1.63045	4.22946e-10	1.69008e-08	ADGRL4
ENSG00000185862	257.107	82.906	1.63342	0.000156762	0.00163508	EVI2B
ENSG00000145901	4576.36	1470.32	1.63826	5.48853e-57	6.3481e-54	TNIP1
ENSG00000113722	24.4787	7.93777	1.6396	6.2894e-05	0.000754257	CDX1
ENSG00000244586	158.429	50.8164	1.64167	0.000239457	0.00233174	WNT5A-AS1
ENSG00000100078	25.3226	8.00869	1.65623	3.03346e-05	0.000400583	PLA2G3
ENSG00000164683	24.1357	7.6645	1.65974	0.000653377	0.0053808	HEY1
ENSG00000135124	742.885	234.148	1.66461	5.74749e-38	2.60124e-35	P2RX4
ENSG00000137094	766.824	241.378	1.66649	4.42544e-37	1.84267e-34	DNAJB5
ENSG00000155465	301.414	94.7389	1.67009	6.40222e-05	0.000765143	SLC7A7
ENSG00000138835	1754.35	549.971	1.67379	1.89176e-06	3.44874e-05	RGS3
ENSG00000145632	1789.4	560.572	1.6744	3.74621e-08	1.01685e-06	PLK2
ENSG00000173210	2520.34	789.199	1.67538	3.744e-05	0.000481744	ABLIM3
ENSG00000110446	742.99	232.276	1.67606	1.18338e-13	7.87118e-12	SLC15A3
ENSG00000105963	104.675	32.7228	1.6787	1.04246e-07	2.56233e-06	ADAP1
ENSG00000050344	78.4059	24.464	1.67918	1.06612e-09	3.99919e-08	NFE2L3
ENSG00000129467	156.391	48.7942	1.68283	2.76123e-06	4.83482e-05	ADCY4
ENSG00000109436	2641.34	819.844	1.68798	1.40208e-73	2.91899e-70	TBC1D9
ENSG00000233682	23.3161	7.24947	1.69325	0.000297583	0.00280461	AL356417.2
ENSG00000184678	417.081	128.763	1.6959	8.65509e-12	4.49352e-10	HIST2H2BE
ENSG00000178860	3652.11	1127.06	1.69607	1.22785e-19	1.77518e-17	MSC
ENSG00000068366	6981.78	2151.61	1.69824	8.02592e-18	9.33473e-16	ACSL4
ENSG00000159164	741.338	228.237	1.69943	1.2575e-11	6.30842e-10	SV2A
ENSG00000266709	21.4913	6.63557	1.69967	3.15348e-05	0.000413167	MGC12916
ENSG00000057657	126.43	38.9421	1.70199	3.37702e-05	0.000439139	PRDM1
ENSG00000165029	2818.58	863.67	1.70657	4.68788e-07	9.84832e-06	ABCA1
ENSG00000167034	200.587	61.4951	1.7076	1.88482e-18	2.36386e-16	NKX3-1
ENSG00000118596	1901.08	581.817	1.70857	4.9414e-17	5.11816e-15	SLC16A7
ENSG00000134668	558.123	169.627	1.71857	0.00068354	0.0055938	SPOCD1
ENSG00000108179	1834.39	555.693	1.72303	3.54915e-11	1.68698e-09	PPIF
ENSG00000082126	57.8828	17.5316	1.72688	0.00115237	0.00866423	MPP4
ENSG00000152952	6314.82	1900.84	1.73221	4.48482e-12	2.47009e-10	PLOD2
ENSG00000062582	85.7354	25.6128	1.73646	9.29187e-08	2.30844e-06	MRPS24
ENSG00000115828	501.979	150.157	1.74113	9.47315e-11	4.17842e-09	QPCT
ENSG00000196912	101.289	30.129	1.75241	1.25746e-21	2.11121e-19	ANKRD36B
ENSG00000103196	527.004	156.103	1.75581	1.84881e-06	3.37634e-05	CRISPLD2
ENSG00000124145	4676.73	1381.22	1.75945	2.28802e-16	2.17508e-14	SDC4
ENSG00000134516	73.118	21.7287	1.75987	6.00671e-06	9.55337e-05	DOCK2
ENSG00000134198	205.022	60.3935	1.7613	2.84204e-07	6.29206e-06	TSPAN2
ENSG00000161921	226.613	66.8937	1.76194	6.09526e-05	0.000734358	CXCL16
ENSG00000271614	278.384	82.1812	1.76258	5.84406e-15	4.67952e-13	ATP2B1-AS1
ENSG00000125347	1065.32	313.504	1.76383	3.97032e-27	9.50092e-25	IRF1
ENSG00000125629	1565.62	460.496	1.76519	4.93196e-77	1.46684e-73	INSIG2
ENSG00000165959	40.4526	11.8357	1.77067	1.56824e-06	2.9308e-05	CLMN
ENSG00000099998	538.531	157.295	1.77538	9.16383e-08	2.28135e-06	GGT5
ENSG00000125657	1026.11	299.41	1.77653	0.000116308	0.00125853	TNFSF9
ENSG00000272168	48.9241	14.2217	1.77914	3.97755e-05	0.00050834	CASC15
ENSG00000127124	237.691	69.207	1.78116	3.16781e-18	3.83434e-16	HIVEP3
ENSG00000145431	1878.02	545.484	1.78396	3.72795e-08	1.01397e-06	PDGFC
ENSG00000029153	936.869	272.247	1.78425	3.1844e-14	2.27041e-12	ARNTL2
ENSG00000115159	2222.68	644.793	1.7857	1.5985e-18	2.02922e-16	GPD2
ENSG00000148154	4511.28	1307.49	1.78646	2.52143e-18	3.08786e-16	UGCG
ENSG00000134363	8307.18	2399.17	1.79185	8.50508e-14	5.74894e-12	FST
ENSG00000173334	262.009	75.4889	1.79693	2.34858e-07	5.30314e-06	TRIB1
ENSG00000214900	33.3878	9.70373	1.79894	0.000269845	0.00258295	LINC01588
ENSG00000204642	148.442	42.5063	1.80366	1.28755e-10	5.56129e-09	HLA-F
ENSG00000100644	21021.7	5978.96	1.81391	8.35597e-27	1.93292e-24	HIF1A
ENSG00000011422	1452.61	412.008	1.81805	7.15492e-09	2.21335e-07	PLAUR
ENSG00000110076	165.888	46.6141	1.82799	2.13296e-05	0.00029408	NRXN2
ENSG00000171208	139.931	39.4275	1.82879	0.000457204	0.00400611	NETO2
ENSG00000106483	8561.25	2406.68	1.83077	9.41864e-10	3.5717e-08	SFRP4
ENSG00000177674	1902.8	531.91	1.83908	6.45562e-33	2.20327e-30	AGTRAP
ENSG00000028137	570.177	159.427	1.83922	3.31316e-13	2.09655e-11	TNFRSF1B
ENSG00000198814	450.038	125.853	1.83937	9.48891e-08	2.34341e-06	GK
ENSG00000136205	2298.69	642.259	1.83938	8.90003e-07	1.76972e-05	TNS3
ENSG00000263528	644.325	179.945	1.84075	1.45937e-18	1.87548e-16	IKBKE
ENSG00000131435	1817.24	506.907	1.84145	1.83528e-39	8.68381e-37	PDLIM4
ENSG00000279227	77.4759	21.5683	1.84889	1.34417e-07	3.23519e-06	AC009303.4
ENSG00000121440	4301.75	1184.81	1.8604	2.57839e-16	2.42894e-14	PDZRN3
ENSG00000271032	14.555	4.02012	1.8625	0.000512794	0.00441151	AC020907.4
ENSG00000104043	63.2373	17.3793	1.86283	4.13304e-06	6.87815e-05	ATP8B4
ENSG00000171729	119.464	32.7095	1.87438	4.17925e-06	6.93843e-05	TMEM51
ENSG00000102096	174.953	47.4582	1.88383	1.03351e-09	3.88389e-08	PIM2
ENSG00000168398	3382.59	901.899	1.90725	6.76944e-06	0.000106525	BDKRB2
ENSG00000008513	5287.69	1408.9	1.90817	1.65333e-29	4.58941e-27	ST3GAL1
ENSG00000058866	30.6183	8.19547	1.91169	6.55125e-05	0.000781159	DGKG
ENSG00000115963	13076.4	3463.71	1.91661	4.87182e-27	1.15257e-24	RND3
ENSG00000125637	236.726	62.7852	1.91799	7.24639e-09	2.235e-07	PSD4
ENSG00000137965	551.485	145.654	1.92085	4.44634e-09	1.44638e-07	IFI44
ENSG00000108960	179.33	47.3774	1.92106	7.11033e-11	3.22506e-09	MMD
ENSG00000100979	3388.03	892.192	1.92504	9.98964e-05	0.00111276	PLTP
ENSG00000153132	319.923	83.7773	1.93418	1.45693e-05	0.000209618	CLGN
ENSG00000025708	1580.32	412.245	1.93801	2.43923e-11	1.18098e-09	TYMP
ENSG00000272269	30.1301	7.89518	1.94021	1.71542e-06	3.15768e-05	AL138724.1
ENSG00000102468	179.201	46.4681	1.94893	1.81378e-06	3.31819e-05	HTR2A
ENSG00000105855	2264.58	584.799	1.95304	1.75606e-09	6.41236e-08	ITGB8
ENSG00000132003	228.114	58.8429	1.95694	2.61913e-11	1.26514e-09	ZSWIM4
ENSG00000108551	418.369	107.755	1.95778	0.00044669	0.00393553	RASD1
ENSG00000090376	2215.72	564.699	1.97257	3.20659e-43	1.85439e-40	IRAK3
ENSG00000145536	138.94	35.0652	1.98683	1.56033e-05	0.000222275	ADAMTS16
ENSG00000276649	38.1532	9.57961	1.98803	1.12641e-07	2.74921e-06	AL117335.1
ENSG00000156463	66.4045	16.7447	1.99283	4.285e-05	0.000542222	SH3RF2
ENSG00000062282	210.682	52.8207	1.9984	8.70397e-05	0.000989766	DGAT2
ENSG00000279484	18.2662	4.52061	1.99889	0.000737077	0.00596626	KLHL30-AS1
ENSG00000163545	277.81	67.8883	2.02957	2.37678e-07	5.34943e-06	NUAK2
ENSG00000128262	45.5007	11.1762	2.03251	1.64992e-06	3.05602e-05	POM121L9P
ENSG00000104290	24.9464	6.00205	2.03521	7.7033e-05	0.000892956	FZD3
ENSG00000100767	348.214	84.035	2.05227	1.97173e-05	0.000274395	PAPLN
ENSG00000136048	15901.3	3785.71	2.07056	6.85723e-17	6.90299e-15	DRAM1
ENSG00000174808	12.6773	2.96804	2.07953	0.00040826	0.00365259	BTC
ENSG00000131669	1599.2	377.262	2.0838	1.9126e-05	0.000266701	NINJ1
ENSG00000157111	566.576	133.231	2.08911	1.32766e-13	8.747e-12	TMEM171
ENSG00000135678	138.685	32.5955	2.09321	1.11661e-05	0.000165811	CPM
ENSG00000228192	13.8666	3.28683	2.10189	0.000499627	0.00430892	AL512353.1
ENSG00000101680	634.654	147.79	2.10314	2.35001e-10	9.78495e-09	LAMA1
ENSG00000130775	126.652	29.4768	2.1038	1.35742e-12	7.87191e-11	THEMIS2
ENSG00000134470	850.04	196.798	2.11084	3.3852e-13	2.13565e-11	IL15RA
ENSG00000138646	52.241	11.9978	2.11895	0.000396326	0.00355651	HERC5
ENSG00000117228	1106.81	254.577	2.11974	7.35916e-13	4.46678e-11	GBP1
ENSG00000107249	1464.24	336.551	2.12111	4.57323e-26	1.01287e-23	GLIS3
ENSG00000172738	153.918	35.2222	2.12999	6.33479e-09	1.97431e-07	TMEM217
ENSG00000144749	2817.69	643.565	2.13064	4.94692e-06	8.08398e-05	LRIG1
ENSG00000105376	22.8361	5.23224	2.13227	3.25947e-05	0.000425448	ICAM5
ENSG00000187608	1367.38	310.477	2.13848	2.36799e-07	5.3354e-06	ISG15
ENSG00000162772	479.169	108.341	2.14232	1.96012e-17	2.13653e-15	ATF3
ENSG00000138685	14263.3	3224.45	2.1452	5.9078e-16	5.32444e-14	FGF2
ENSG00000056972	1670.83	377.96	2.14533	7.5814e-33	2.54576e-30	TRAF3IP2
ENSG00000162620	10.6393	2.35408	2.16169	0.00046881	0.00409059	LRRIQ3
ENSG00000110911	3352.08	748.888	2.16263	3.13501e-33	1.12531e-30	SLC11A2
ENSG00000135525	41.6778	9.29666	2.17315	2.31209e-06	4.13535e-05	MAP7
ENSG00000124813	282.966	62.5068	2.18057	9.37416e-10	3.56132e-08	RUNX2
ENSG00000188710	46.3172	10.2623	2.18551	4.02074e-06	6.71274e-05	QRFP
ENSG00000211696	10.0635	2.24583	2.18562	0.00105623	0.00806961	TRGV8
ENSG00000077150	2725	598.898	2.18631	7.39548e-37	3.01895e-34	NFKB2
ENSG00000158869	16.6357	3.67858	2.19558	0.00135451	0.00987979	FCER1G
ENSG00000149380	852.995	185.425	2.2022	2.58941e-06	4.57631e-05	P4HA3
ENSG00000122641	11222.2	2436.64	2.2034	0.000694071	0.00566218	INHBA
ENSG00000173114	322.692	70.1131	2.20391	2.77342e-07	6.15562e-06	LRRN3
ENSG00000081051	48.4765	10.387	2.20748	3.67084e-08	1.00161e-06	AFP
ENSG00000279581	35.1261	7.51968	2.21861	4.80985e-05	0.000598186	AC073862.2
ENSG00000085662	13942.7	2983.29	2.22458	1.25792e-08	3.66788e-07	AKR1B1
ENSG00000224397	41.1081	8.78774	2.23362	0.000157281	0.00163886	SMIM25
ENSG00000162817	22.8306	4.75425	2.2487	1.12847e-06	2.1895e-05	C1orf115
ENSG00000131459	7121.96	1493.44	2.25368	2.16751e-17	2.33811e-15	GFPT2
ENSG00000171951	464.406	97.3533	2.25529	9.60316e-06	0.00014572	SCG2
ENSG00000143995	1281.89	268.235	2.25746	3.415e-27	8.36435e-25	MEIS1
ENSG00000230606	26.9986	5.55078	2.26592	3.03373e-07	6.6274e-06	AC092683.1
ENSG00000285744	50.5457	10.4676	2.27189	2.1232e-07	4.85747e-06	AC083837.2
ENSG00000223799	22.1341	4.57009	2.27575	2.8712e-07	6.33887e-06	IL10RB-DT
ENSG00000157551	396.184	81.8598	2.27744	9.11792e-12	4.72204e-10	KCNJ15
ENSG00000158427	8.68177	1.78544	2.27901	0.000934706	0.00729372	TMSB15B
ENSG00000006606	67.3433	13.8866	2.27965	5.4839e-18	6.48689e-16	CCL26
ENSG00000176597	116.171	23.9437	2.28207	0.000175919	0.00180505	B3GNT5
ENSG00000154175	69870.4	14309.2	2.28775	2.49005e-09	8.7568e-08	ABI3BP
ENSG00000175426	115.569	23.654	2.28938	1.48613e-05	0.000212937	PCSK1
ENSG00000087258	30.6051	6.27157	2.29194	6.72261e-05	0.000797028	GNAO1
ENSG00000241163	9.75297	1.99623	2.29473	0.000960731	0.00746323	LINC00877
ENSG00000123685	13.677	2.75177	2.29578	8.54202e-05	0.000974446	BATF3
ENSG00000159200	3856.91	780.015	2.30556	5.57938e-32	1.73369e-29	RCAN1
ENSG00000002745	12.8163	2.57849	2.3074	0.000174027	0.0017874	WNT16
ENSG00000106366	69212.5	13911.6	2.31474	6.43818e-15	5.1355e-13	SERPINE1
ENSG00000187764	104.537	20.9492	2.31483	5.66458e-11	2.60909e-09	SEMA4D
ENSG00000248323	66.2262	13.3904	2.31786	5.84355e-07	1.21172e-05	LUCAT1
ENSG00000176076	11.027	2.21149	2.31948	0.000463977	0.00405863	KCNE5
ENSG00000124466	12.0853	2.45392	2.32727	0.000236266	0.00230497	LYPD3
ENSG00000162654	116.237	23.1493	2.32861	3.89263e-07	8.28636e-06	GBP4
ENSG00000139211	777.163	154.453	2.33147	0.000891619	0.0069942	AMIGO2
ENSG00000133657	20038.8	3968	2.33635	2.33959e-17	2.51071e-15	ATP13A3
ENSG00000183018	43.6848	8.59371	2.34199	3.36192e-06	5.72764e-05	SPNS2
ENSG00000111885	12424.1	2448.1	2.34348	2.55777e-19	3.59799e-17	MAN1A1
ENSG00000134070	594.4	117.029	2.34576	6.50019e-06	0.000102598	IRAK2
ENSG00000171608	1126.67	219.788	2.3583	1.56306e-34	5.91662e-32	PIK3CD
ENSG00000179300	25.6846	4.92865	2.37115	6.359e-05	0.000760851	RTL3
ENSG00000280241	56.9791	10.8782	2.38031	4.59153e-09	1.48896e-07	AC079298.3
ENSG00000174325	73.4957	14.0182	2.38836	0.00114501	0.00862444	DIRC1
ENSG00000123500	46.6733	8.94366	2.3895	0.000244791	0.00237369	COL10A1
ENSG00000164694	7835.49	1489.66	2.39505	5.28559e-09	1.68515e-07	FNDC1
ENSG00000159110	34.7302	6.5933	2.39573	9.03162e-10	3.43746e-08	IFNAR2
ENSG00000278934	118.355	22.4309	2.405	3.02435e-17	3.22892e-15	AC117489.1
ENSG00000184156	197.695	37.1815	2.40996	2.5749e-09	9.02472e-08	KCNQ3
ENSG00000074410	6633.16	1244.25	2.4145	1.48784e-06	2.79057e-05	CA12
ENSG00000136167	62.2767	11.6743	2.42112	0.000103785	0.00114323	LCP1
ENSG00000119703	47.872	8.84297	2.42208	1.28483e-12	7.49267e-11	ZC2HC1C
ENSG00000196878	1682.01	312.626	2.42831	4.19949e-22	7.28577e-20	LAMB3
ENSG00000176387	17.3855	3.2357	2.43114	0.00135486	0.00987979	HSD11B2
ENSG00000101230	40.2406	7.47869	2.43118	0.000692475	0.00565136	ISM1
ENSG00000213949	2435	451.355	2.43132	1.23416e-17	1.38887e-15	ITGA1
ENSG00000105792	286.237	53.1362	2.43298	3.84372e-17	4.06205e-15	CFAP69
ENSG00000258590	11.9144	2.20342	2.43562	0.00026515	0.00254502	NBEAP1
ENSG00000110031	1122.99	205.207	2.45278	2.44731e-06	4.34731e-05	LPXN
ENSG00000229656	56.063	10.2847	2.45283	5.32645e-11	2.46974e-09	ITGB1-DT
ENSG00000101670	578.494	105.728	2.45288	1.6901e-07	3.98033e-06	LIPG
ENSG00000171617	1756.78	319.951	2.45735	1.15645e-07	2.81591e-06	ENC1
ENSG00000104856	1142.85	207.962	2.45968	2.57922e-27	6.39248e-25	RELB
ENSG00000113946	12.489	2.29814	2.47803	0.000413573	0.003686	CLDN16
ENSG00000137393	534.874	95.3488	2.48526	8.18347e-13	4.90984e-11	RNF144B
ENSG00000100906	2799.87	500.159	2.48568	1.97162e-97	1.02618e-93	NFKBIA
ENSG00000172575	63.7974	11.3383	2.49942	9.65119e-11	4.23899e-09	RASGRP1
ENSG00000273472	109.17	18.8166	2.53596	9.2674e-35	3.64034e-32	AC096733.2
ENSG00000105246	17.2212	2.94385	2.53722	0.000207331	0.00207022	EBI3
ENSG00000132185	374.478	64.4648	2.5382	1.48244e-06	2.78294e-05	FCRLA
ENSG00000186648	40.1167	6.87932	2.54893	3.84883e-07	8.20728e-06	CARMIL3
ENSG00000156206	16.4611	2.8011	2.55382	5.06493e-05	0.000625426	CFAP161
ENSG00000211448	87.214	14.8187	2.55604	7.70944e-09	2.3708e-07	DIO2
ENSG00000258311	261.82	44.4655	2.55695	1.78099e-07	4.15678e-06	BLOC1S1-RDH5
ENSG00000183876	277.632	47.1841	2.5581	9.81091e-06	0.000148332	ARSI
ENSG00000164136	114.978	19.6023	2.56025	5.18031e-25	1.07849e-22	IL15
ENSG00000146457	9402.57	1532.23	2.61758	1.05943e-34	4.08448e-32	WTAP
ENSG00000197208	476.612	77.563	2.62073	5.08251e-11	2.36717e-09	SLC22A4
ENSG00000107736	30.0783	4.93847	2.62199	1.17372e-05	0.000172377	CDH23
ENSG00000186088	239.885	38.9563	2.62582	5.36671e-12	2.87222e-10	GSAP
ENSG00000103044	240.54	38.5738	2.63824	1.10529e-14	8.5341e-13	HAS3
ENSG00000279030	25.1502	4.06447	2.64218	7.82078e-06	0.000121146	AC007336.3
ENSG00000168811	50.6761	8.0262	2.6554	5.42161e-11	2.50828e-09	IL12A
ENSG00000235385	111.633	17.787	2.65587	1.70543e-05	0.000240388	LINC02154
ENSG00000158825	91.1338	14.2984	2.66893	7.34033e-09	2.26063e-07	CDA
ENSG00000134769	1068.29	167.069	2.67749	1.36757e-09	5.05708e-08	DTNA
ENSG00000118849	120.35	18.6631	2.68697	1.06999e-07	2.61764e-06	RARRES1
ENSG00000158859	437.763	67.0954	2.70704	4.6319e-10	1.8403e-08	ADAMTS4
ENSG00000206432	78.9496	12.0992	2.70772	2.14539e-09	7.66122e-08	TMEM200C
ENSG00000180044	385.997	59.0786	2.7083	0.000593396	0.0049694	C3orf80
ENSG00000114805	13.4233	2.098	2.70972	0.00115279	0.00866423	PLCH1
ENSG00000126709	3006.32	458.47	2.71303	1.48381e-07	3.54666e-06	IFI6
ENSG00000111331	854.349	130.246	2.71344	7.71921e-05	0.000893806	OAS3
ENSG00000133106	669.511	100.843	2.73035	8.60507e-08	2.15842e-06	EPSTI1
ENSG00000258777	18.7532	2.81396	2.74031	6.47381e-07	1.32136e-05	HIF1A-AS1
ENSG00000196549	17851.4	2653.3	2.75028	2.1149e-27	5.36951e-25	MME
ENSG00000119915	62.8884	9.27348	2.75273	4.93118e-14	3.4107e-12	ELOVL3
ENSG00000075651	2022.78	297.781	2.76434	8.86763e-25	1.79238e-22	PLD1
ENSG00000120949	27.2746	3.98208	2.77168	2.12577e-08	5.98059e-07	TNFRSF8
ENSG00000140519	50.2307	7.30363	2.78714	5.492e-05	0.000668643	RHCG
ENSG00000091972	239.905	34.5709	2.79469	6.44249e-13	3.94489e-11	CD200
ENSG00000149506	12.6252	1.80267	2.80561	0.000111672	0.0012185	ZP1
ENSG00000148344	16683.3	2347.62	2.82913	3.53012e-33	1.24565e-30	PTGES
ENSG00000090339	3492.7	489.563	2.83512	1.22231e-12	7.1885e-11	ICAM1
ENSG00000203446	11.5725	1.63646	2.84067	0.00109798	0.00832744	AC004988.1
ENSG00000187479	1764.22	243.443	2.85684	3.02061e-20	4.65823e-18	C11orf96
ENSG00000115194	8.6503	1.18778	2.85974	0.00021928	0.0021649	SLC30A3
ENSG00000197632	2542.89	348.327	2.86802	0.000335944	0.00310984	SERPINB2
ENSG00000223949	74.5418	10.1455	2.88025	8.34109e-08	2.0998e-06	ROR1-AS1
ENSG00000197646	916.404	124.542	2.88124	9.50064e-44	6.36046e-41	PDCD1LG2
ENSG00000089351	5468.03	741.844	2.88204	8.19351e-63	1.31216e-59	GRAMD1A
ENSG00000091129	717.579	96.7006	2.89039	2.45869e-05	0.000333687	NRCAM
ENSG00000047936	51.1152	6.71337	2.91312	7.88589e-18	9.22339e-16	ROS1
ENSG00000168685	854.596	113.09	2.91592	2.92014e-12	1.64755e-10	IL7R
ENSG00000253194	13.9068	1.8447	2.92282	0.000244384	0.00237084	AL137009.1
ENSG00000249992	1579.23	206.828	2.93307	4.41709e-08	1.17897e-06	TMEM158
ENSG00000114270	3244.04	420.963	2.94646	1.03114e-20	1.63872e-18	COL7A1
ENSG00000128849	344.738	44.5168	2.95568	1.89145e-13	1.23831e-11	CGNL1
ENSG00000137869	26.431	3.40417	2.9565	6.01178e-08	1.56841e-06	CYP19A1
ENSG00000138642	538.5	69.2729	2.9578	2.19949e-09	7.82754e-08	HERC6
ENSG00000237499	56.6091	7.27128	2.96326	1.23698e-16	1.20905e-14	AL357060.1
ENSG00000236393	50.9384	6.37338	2.99307	4.97214e-07	1.0414e-05	AC091806.1
ENSG00000228741	35.1909	4.44732	2.99312	8.12398e-11	3.64125e-09	SPATA13
ENSG00000268812	36.7256	4.66666	2.99373	0.000553672	0.00468955	AC004264.1
ENSG00000259471	11.3303	1.43147	2.99788	0.000630887	0.00522452	LINC01169
ENSG00000230067	48.7191	6.1206	3.00208	3.61689e-09	1.21648e-07	HSPD1P6
ENSG00000153823	3548.72	442.139	3.00506	3.31933e-15	2.74226e-13	PID1
ENSG00000105509	326.266	40.3553	3.01795	1.74887e-09	6.39891e-08	HAS1
ENSG00000155629	18.0339	2.20176	3.02761	0.000137956	0.00146405	PIK3AP1
ENSG00000236581	13.1327	1.56705	3.05436	5.3902e-05	0.000658347	STARD13-AS
ENSG00000152270	61.3495	7.33072	3.05868	4.56927e-12	2.50997e-10	PDE3B
ENSG00000118407	138.83	16.7214	3.05917	3.52347e-11	1.67861e-09	FILIP1
ENSG00000119508	475.8	56.9693	3.06591	5.88589e-49	4.90153e-46	NR4A3
ENSG00000255823	42.2979	5.12055	3.06816	1.27266e-11	6.35383e-10	MTRNR2L8
ENSG00000135437	726.61	86.3195	3.07286	3.44659e-13	2.16781e-11	RDH5
ENSG00000173926	745.083	88.2119	3.08122	1.09898e-26	2.51424e-24	2003-03-01
ENSG00000105707	22.2381	2.61127	3.09185	4.48386e-05	0.000563365	HPN
ENSG00000119630	199.809	23.4747	3.093	3.24963e-09	1.1109e-07	PGF
ENSG00000260454	402.031	47.0207	3.09708	0.000117685	0.0012708	AL355607.2
ENSG00000124391	6.87326	0.805255	3.09802	0.000836868	0.00661456	IL17C
ENSG00000124126	266.395	31.1091	3.10184	8.83071e-25	1.79238e-22	PREX1
ENSG00000113448	434.281	50.439	3.10963	4.254e-18	5.11931e-16	PDE4D
ENSG00000133805	2209.85	248.919	3.15108	4.79282e-32	1.51184e-29	AMPD3
ENSG00000225886	19.7649	2.17504	3.16853	0.000201087	0.00202146	AL445490.1
ENSG00000257335	41.4865	4.50192	3.21731	5.23528e-09	1.67425e-07	MGAM
ENSG00000054938	33.7302	3.65212	3.21891	3.49515e-08	9.56182e-07	CHRDL2
ENSG00000226012	53.9047	5.8273	3.22569	9.21457e-07	1.82356e-05	AP001434.1
ENSG00000224982	27.1815	2.92989	3.23735	6.54136e-05	0.000780427	TMEM233
ENSG00000166592	407.864	43.2608	3.23807	1.49515e-24	2.96452e-22	RRAD
ENSG00000041982	6560.31	685.369	3.25855	2.3103e-20	3.58941e-18	TNC
ENSG00000157214	1878.73	194.757	3.27042	2.39382e-05	0.000325945	STEAP2
ENSG00000110944	108.689	11.0425	3.29436	4.76729e-09	1.54115e-07	IL23A
ENSG00000095752	516.598	52.1293	3.30887	2.62052e-06	4.61952e-05	IL11
ENSG00000227039	21.6964	2.1286	3.31503	1.85808e-07	4.31253e-06	ITGB2-AS1
ENSG00000233817	8.11165	0.838657	3.33082	0.000289951	0.00274636	AL162727.1
ENSG00000153012	104.91	10.32	3.34345	1.3558e-06	2.57981e-05	LGI2
ENSG00000186907	84.7559	8.33394	3.34354	5.72743e-09	1.8094e-07	RTN4RL2
ENSG00000285698	26.8711	2.61252	3.36287	6.31944e-07	1.29365e-05	AL049825.1
ENSG00000164647	1421.42	134.152	3.40598	6.20989e-06	9.86145e-05	STEAP1
ENSG00000007264	10.6509	1.00627	3.41408	0.000758594	0.00610482	MATK
ENSG00000162595	51.8037	4.88423	3.41852	3.81274e-09	1.27207e-07	DIRAS3
ENSG00000113070	205.117	18.7652	3.45263	1.0714e-11	5.45367e-10	HBEGF
ENSG00000008517	893.947	81.6481	3.45404	7.72609e-23	1.44909e-20	IL32
ENSG00000004468	39.6549	3.62589	3.45511	3.77859e-07	8.07664e-06	CD38
ENSG00000198959	5619.47	509.829	3.46241	3.94221e-05	0.000504443	TGM2
ENSG00000137033	4925.73	436.181	3.49743	4.45669e-08	1.18801e-06	IL33
ENSG00000234948	9.06769	0.798455	3.50494	0.000863488	0.00679658	LINC01524
ENSG00000237927	21.0899	1.84675	3.53639	5.36219e-07	1.11971e-05	AL078604.2
ENSG00000232702	6.89774	0.561556	3.54673	0.000517479	0.00444264	AL158050.1
ENSG00000029559	9.39829	0.798455	3.55812	0.000461802	0.004043	IBSP
ENSG00000229116	11.7789	0.998313	3.56075	5.52834e-05	0.000672674	AL137026.1
ENSG00000146555	593.222	50.1419	3.56359	0.000731278	0.00592304	SDK1
ENSG00000256128	19.0215	1.59008	3.57216	8.0477e-07	1.61567e-05	LINC00944
ENSG00000157601	1459.52	122.626	3.57292	9.27244e-05	0.0010446	MX1
ENSG00000100739	892.859	74.9738	3.57643	2.28344e-27	5.72759e-25	BDKRB1
ENSG00000028277	2302.36	192.586	3.58026	3.85372e-14	2.6923e-12	POU2F2
ENSG00000237410	9.65985	0.826454	3.58118	3.16605e-05	0.000413513	AP001092.1
ENSG00000234789	16.8039	1.41142	3.58232	2.68817e-08	7.46201e-07	AL590369.1
ENSG00000111335	899.107	74.6599	3.58983	3.35811e-05	0.000436953	OAS2
ENSG00000159212	326.082	26.9953	3.59234	1.9349e-10	8.22095e-09	CLIC6
ENSG00000085117	3088.44	253.87	3.60526	8.8526e-31	2.67105e-28	CD82
ENSG00000118257	9476.5	770.06	3.62147	2.50054e-22	4.48783e-20	NRP2
ENSG00000042062	1057.7	85.9524	3.6222	1.59772e-14	1.20956e-12	RIPOR3
ENSG00000138821	9272.91	752.398	3.62371	5.54776e-40	2.68602e-37	SLC39A8
ENSG00000184828	31.9911	2.59401	3.62454	4.22881e-08	1.13184e-06	ZBTB7C
ENSG00000159261	19.966	1.62966	3.62929	2.79606e-05	0.000372671	CLDN14
ENSG00000104635	31092.2	2512.61	3.62941	2.00468e-163	4.17354e-159	SLC39A14
ENSG00000065320	552.742	44.5089	3.63494	1.10242e-43	6.85962e-41	NTN1
ENSG00000006118	7632.85	613.18	3.63804	3.2274e-13	2.04851e-11	TMEM132A
ENSG00000134343	9.98633	0.802049	3.64078	0.00117341	0.00879695	ANO3
ENSG00000179799	14.9037	1.19445	3.64117	4.15333e-06	6.90089e-05	OR7E22P
ENSG00000243649	1540.91	121.559	3.66402	1.00689e-14	7.8511e-13	CFB
ENSG00000184588	109.89	8.72853	3.6667	2.19941e-09	7.82754e-08	PDE4B
ENSG00000128271	49.2465	3.94525	3.66848	2.02303e-10	8.54308e-09	ADORA2A
ENSG00000256810	15.1783	1.17182	3.67118	8.0374e-05	0.000925501	AC078925.1
ENSG00000231123	65.1771	5.18714	3.68491	1.46966e-17	1.6362e-15	SPATA20P1
ENSG00000177614	7.67561	0.561556	3.6978	0.000823448	0.00653828	PGBD5
ENSG00000123689	3143.94	239.03	3.71771	4.26567e-46	3.17168e-43	G0S2
ENSG00000006128	21.0507	1.5957	3.71902	1.00621e-05	0.000151909	TAC1
ENSG00000137462	15.9126	1.13482	3.74062	3.10212e-07	6.74144e-06	TLR2
ENSG00000169715	3828.23	285.714	3.74307	8.78e-83	3.04651e-79	MT1E
ENSG00000120217	75.2727	5.62359	3.7443	1.13335e-12	6.70322e-11	CD274
ENSG00000244122	16.8209	1.27629	3.75826	0.000989899	0.00763286	UGT1A7
ENSG00000178882	317.756	23.4601	3.76252	2.69693e-12	1.52574e-10	RFLNA
ENSG00000285805	5.5862	0.413227	3.77189	0.000957233	0.00744161	AC012378.2
ENSG00000169218	13.6768	0.979809	3.77243	2.44483e-06	4.34662e-05	RSPO1
ENSG00000117148	8.20107	0.591764	3.77261	0.00121083	0.009032	ACTL8
ENSG00000276980	16.7458	1.22466	3.79303	1.38796e-07	3.33672e-06	AC008760.2
ENSG00000159167	411.13	29.6856	3.79409	1.19604e-05	0.000175355	STC1
ENSG00000117501	22.4626	1.60278	3.81293	2.9505e-05	0.000390753	MROH9
ENSG00000162366	24.3328	1.66679	3.81833	7.2347e-05	0.000847127	PDZK1IP1
ENSG00000176136	5.77725	0.383797	3.82113	0.000687298	0.00561793	MC5R
ENSG00000164142	5.83011	0.396776	3.83055	0.000788537	0.00630678	FAM160A1
ENSG00000237596	23.2429	1.65009	3.84562	4.52244e-08	1.204e-06	AL138828.1
ENSG00000163874	3516.67	244.549	3.84671	4.25216e-113	2.95086e-109	ZC3H12A
ENSG00000248371	17.6182	1.24083	3.86146	6.13726e-07	1.2622e-05	LINC02056
ENSG00000109272	11.6704	0.803702	3.86484	5.00383e-05	0.000618982	PF4V1
ENSG00000141052	189.928	12.9983	3.86633	7.86849e-09	2.41258e-07	MYOCD
ENSG00000139364	403.63	27.5817	3.87079	1.72033e-07	4.03783e-06	TMEM132B
ENSG00000198771	53.2596	3.51894	3.90574	3.49552e-10	1.42414e-08	RCSD1
ENSG00000249917	15.2672	1.05137	3.90993	1.38245e-05	0.000200427	LINC00536
ENSG00000137331	8243.29	544.21	3.92103	1.07847e-15	9.47372e-14	IER3
ENSG00000267669	6.33331	0.426207	3.94319	0.000981735	0.00757832	AC098847.1
ENSG00000144802	3963.86	254.763	3.9603	2.74675e-46	2.11795e-43	NFKBIZ
ENSG00000129682	124.975	7.96041	3.96639	3.42402e-30	1.01835e-27	FGF13
ENSG00000173918	6775.69	430.076	3.97801	1.03191e-17	1.17395e-15	C1QTNF1
ENSG00000121594	4.3563	0.200512	3.97968	0.000921772	0.00720901	CD80
ENSG00000105711	1471.32	93.3057	3.98094	3.36579e-52	3.18511e-49	SCN1B
ENSG00000235885	9.39193	0.579283	3.98283	8.1622e-05	0.000937798	LINC01828
ENSG00000134326	143.781	9.01981	3.98845	3.00684e-08	8.2913e-07	CMPK2
ENSG00000239590	6.57998	0.426207	3.98856	0.00111467	0.00842644	OR1J4
ENSG00000124731	23.198	1.489	3.99854	9.11462e-05	0.00102849	TREM1
ENSG00000168389	250.577	15.5419	4.00854	3.37477e-34	1.25463e-31	MFSD2A
ENSG00000145040	48.6824	3.05108	4.01338	3.5645e-16	3.26913e-14	UCN2
ENSG00000134532	64.1911	3.87113	4.02228	1.18741e-15	1.03433e-13	SOX5
ENSG00000131979	949.067	57.9112	4.03468	1.88198e-53	1.86576e-50	GCH1
ENSG00000259354	13.2583	0.828008	4.04057	5.33954e-06	8.63073e-05	AC025580.2
ENSG00000236136	48.4423	2.95013	4.07081	1.03959e-08	3.09631e-07	ADORA2BP1
ENSG00000254887	58.0902	3.54913	4.07278	9.86612e-16	8.74054e-14	AC010247.1
ENSG00000178803	30.5044	1.78494	4.0807	5.55953e-11	2.56638e-09	ADORA2A-AS1
ENSG00000225492	50.5408	2.93711	4.08572	6.2512e-12	3.31155e-10	GBP1P1
ENSG00000096996	7.04251	0.408479	4.09014	0.000283157	0.0026918	IL12RB1
ENSG00000244953	4.70361	0.183284	4.09427	0.00119833	0.00894519	AC087521.1
ENSG00000205362	25.0229	1.47836	4.1355	2.07853e-08	5.86694e-07	MT1A
ENSG00000116882	4.82859	0.213492	4.13675	0.00112469	0.00849291	HAO2
ENSG00000255282	17.9573	0.987763	4.17789	8.25919e-05	0.000947895	WTAPP1
ENSG00000137491	177.476	9.8054	4.18361	4.47159e-06	7.36519e-05	SLCO2B1
ENSG00000050730	586.621	31.9033	4.20137	4.10315e-56	4.49598e-53	TNIP3
ENSG00000229271	5.1124	0.212715	4.21287	0.000207115	0.00207004	AC091493.1
ENSG00000118322	3.52552	0	4.25559	0.000980161	0.00757694	ATP10B
ENSG00000227482	11.6994	0.638145	4.26003	0.000115886	0.00125461	AL157702.2
ENSG00000234883	19.3424	0.987763	4.27278	6.70577e-08	1.72996e-06	MIR155HG
ENSG00000060140	46.6882	2.40173	4.27819	2.14514e-14	1.58368e-12	STYK1
ENSG00000108932	27.6487	1.42992	4.2854	0.000119609	0.00128756	SLC16A6
ENSG00000103569	15.6668	0.803202	4.29027	3.97116e-06	6.65129e-05	AQP9
ENSG00000273167	7.98509	0.413227	4.29032	0.000158295	0.0016486	AL359736.1
ENSG00000135917	121.913	6.19947	4.29614	2.45488e-37	1.04302e-34	SLC19A3
ENSG00000125730	26749.2	1359.89	4.29802	4.31078e-23	8.2336e-21	C3
ENSG00000162493	2611.29	132.374	4.30207	1.20538e-20	1.90112e-18	PDPN
ENSG00000162490	31.8905	1.63867	4.30245	3.25885e-07	7.04527e-06	DRAXIN
ENSG00000175294	3.66094	0	4.31578	0.000886038	0.00695305	CATSPER1
ENSG00000134802	4592.9	230.198	4.31897	4.62264e-61	6.41591e-58	SLC43A3
ENSG00000147145	32.1729	1.60306	4.32268	2.64553e-11	1.27494e-09	LPAR4
ENSG00000135114	63.8665	3.11899	4.34257	1.12951e-06	2.1895e-05	OASL
ENSG00000119698	102.583	5.09767	4.34858	2.13766e-25	4.58803e-23	PPP4R4
ENSG00000140093	3.77708	0	4.34937	0.000487451	0.0042302	SERPINA10
ENSG00000265096	12.3018	0.621194	4.35212	1.50797e-05	0.000215622	C1QTNF1-AS1
ENSG00000137959	642.694	31.4465	4.35218	7.14526e-06	0.000111764	IFI44L
ENSG00000146374	454.487	22.2508	4.35654	7.73167e-20	1.14975e-17	RSPO3
ENSG00000279976	20.6473	0.976059	4.37923	4.07113e-06	6.78055e-05	AC073862.4
ENSG00000023445	771.627	37.0134	4.38377	2.93797e-35	1.17626e-32	BIRC3
ENSG00000105825	17464.4	829.667	4.39578	5.88801e-05	0.000711862	TFPI2
ENSG00000229644	1660.21	78.8843	4.39679	5.03669e-42	2.62147e-39	NAMPTP1
ENSG00000267909	3.88315	0	4.39808	0.000790602	0.00632087	CCDC177
ENSG00000261618	8.72847	0.407702	4.40085	0.000189018	0.00192147	AC083837.1
ENSG00000188501	107.452	5.04321	4.41599	1.05859e-17	1.19776e-15	LCTL
ENSG00000115008	367.818	17.2327	4.41671	1.62211e-05	0.000229733	IL1A
ENSG00000227619	5.85124	0.183284	4.41816	0.00068682	0.00561622	AL391056.1
ENSG00000234076	3.98194	0	4.42651	0.000799492	0.00637969	TPRG1-AS1
ENSG00000124102	26.734	1.27784	4.43902	1.44384e-06	2.72276e-05	PI3
ENSG00000203837	124.003	5.75149	4.44387	2.75765e-15	2.30568e-13	PNLIPRP3
ENSG00000085514	253.404	11.5781	4.46135	2.27216e-37	9.85502e-35	PILRA
ENSG00000105835	19882.3	896.3	4.47158	1.11589e-63	1.93597e-60	NAMPT
ENSG00000118503	7496.66	334.928	4.48492	3.33297e-49	2.89122e-46	TNFAIP3
ENSG00000138135	845.049	37.7245	4.48672	2.76681e-25	5.87778e-23	CH25H
ENSG00000225790	36.0764	1.6137	4.48806	9.58403e-11	4.21839e-09	AC007953.1
ENSG00000189120	47.2993	2.09209	4.5362	1.01393e-11	5.21208e-10	SP6
ENSG00000187193	339.853	14.2091	4.57872	1.51736e-90	6.31798e-87	MT1X
ENSG00000235782	264.226	10.7701	4.62038	2.72658e-06	4.78219e-05	AL031429.1
ENSG00000112299	14.9568	0.603467	4.62704	2.33306e-06	4.1657e-05	VNN1
ENSG00000229400	6.78688	0.194988	4.62739	2.72938e-05	0.000365421	AL596330.1
ENSG00000277632	4.6301	0	4.64028	0.000266325	0.00255513	CCL3
ENSG00000181374	36.1108	1.41772	4.67788	7.6803e-07	1.54639e-05	CCL13
ENSG00000064886	229.276	8.92608	4.68793	2.59418e-19	3.62471e-17	CHI3L2
ENSG00000133169	347.565	13.3527	4.70382	0.00116616	0.00875526	BEX1
ENSG00000125148	22206.7	850.002	4.70759	1.66754e-57	2.04215e-54	MT2A
ENSG00000117594	6043.97	222.04	4.76698	8.13286e-11	3.64125e-09	HSD11B1
ENSG00000169436	27.5662	1.02272	4.77027	4.23066e-06	7.0126e-05	COL22A1
ENSG00000163131	2454.16	88.6678	4.792	2.99514e-23	5.77368e-21	CTSS
ENSG00000142224	5.1406	0	4.80498	0.00104831	0.0080209	IL19
ENSG00000161896	5.20904	0	4.81487	0.000953756	0.00741735	IP6K3
ENSG00000162840	56.9066	2.02181	4.81903	1.56639e-07	3.71843e-06	MT2P1
ENSG00000125735	22.9095	0.822206	4.82544	5.50293e-08	1.44289e-06	TNFSF14
ENSG00000163737	12.0095	0.378272	4.87346	0.0001103	0.00120669	PF4
ENSG00000113645	502.863	17.2072	4.87939	5.52269e-44	3.96472e-41	WWC1
ENSG00000240665	5.52481	0	4.90924	0.000466409	0.00407819	LSP1P2
ENSG00000049249	56.2775	1.86165	4.95194	4.69347e-16	4.24841e-14	TNFRSF9
ENSG00000128342	4836.67	152.777	4.98495	1.99183e-10	8.42845e-09	LIF
ENSG00000139572	5.83215	0	4.98892	0.000376229	0.00340997	GPR84
ENSG00000169508	9.19905	0.213492	5.06265	4.48006e-05	0.000563227	GPR183
ENSG00000197696	6559.89	195.599	5.06794	1.15349e-11	5.82878e-10	NMB
ENSG00000187957	327.919	9.6218	5.0989	1.348e-10	5.81037e-09	DNER
ENSG00000224173	6.36385	0	5.11291	1.16252e-05	0.000170921	AC007422.1
ENSG00000134321	171.196	4.93128	5.11345	4.25031e-07	9.00175e-06	RSAD2
ENSG00000176907	14.367	0.407702	5.13269	3.11021e-05	0.000408784	TCIM
ENSG00000283265	6.50148	0	5.1361	2.97779e-06	5.15333e-05	AL356234.3
ENSG00000183760	6.48497	0	5.14322	1.2361e-05	0.000180592	ACP7
ENSG00000177575	49.5651	1.40574	5.14578	2.46275e-16	2.33055e-14	CD163
ENSG00000244321	6.77732	0	5.19991	0.000214867	0.00213147	LINC01326
ENSG00000140379	10.2019	0.194988	5.21572	5.90208e-06	9.41574e-05	BCL2A1
ENSG00000205300	6.91294	0	5.23293	9.10235e-06	0.000139135	AL356414.1
ENSG00000172061	5085.04	134.282	5.24371	3.40731e-28	8.8671e-26	LRRC15
ENSG00000152503	53.9078	1.40021	5.26587	3.42313e-15	2.81684e-13	TRIM36
ENSG00000164181	86.2631	2.28206	5.27027	8.44333e-15	6.6584e-13	ELOVL7
ENSG00000069535	62.7549	1.63006	5.27034	0.00124174	0.00920651	MAOB
ENSG00000142185	7.25979	0	5.3032	1.75455e-05	0.000247145	TRPM2
ENSG00000123610	18961.4	471.984	5.32818	1.56385e-37	6.9272e-35	TNFAIP6
ENSG00000214510	16.5786	0.426207	5.33617	0.000942479	0.00734612	SPINK13
ENSG00000169248	7.82445	0	5.40283	0.00013603	0.00144638	CXCL11
ENSG00000120337	8.11895	0	5.45677	5.11766e-06	8.32174e-05	TNFSF18
ENSG00000104951	352.357	7.9256	5.48942	2.41429e-75	5.58479e-72	IL4I1
ENSG00000232294	8.30732	0	5.49674	1.08592e-06	2.1208e-05	AL031674.1
ENSG00000165474	71.7715	1.56543	5.51021	8.63608e-05	0.000984097	GJB2
ENSG00000136688	12.6408	0.200512	5.52351	9.61889e-06	0.000145853	IL36G
ENSG00000115919	56.0406	1.22388	5.53867	1.18729e-15	1.03433e-13	KYNU
ENSG00000260549	210.283	4.08872	5.65358	9.77639e-44	6.36046e-41	MT1L
ENSG00000231574	185.465	3.62781	5.68053	4.75297e-29	1.28509e-26	LINC02015
ENSG00000205361	14.8308	0.213492	5.75468	2.98189e-07	6.54852e-06	MT1DP
ENSG00000250657	296.173	5.46201	5.76665	1.0901e-05	0.000162803	AC097451.1
ENSG00000154451	34.5855	0.584963	5.84821	1.22007e-09	4.54393e-08	GBP5
ENSG00000134339	10.6763	0	5.84901	1.91411e-05	0.000266733	SAA2
ENSG00000205364	613.63	10.2563	5.89025	2.19728e-71	4.15865e-68	MT1M
ENSG00000073756	5564.12	93.3188	5.89834	2.98185e-21	4.92692e-19	PTGS2
ENSG00000136244	15357.9	255.727	5.9084	4.24184e-62	6.30792e-59	IL6
ENSG00000205502	11.1409	0	5.91945	6.18383e-07	1.26887e-05	C2CD4B
ENSG00000172817	797.7	12.9249	5.94174	1.99202e-25	4.31999e-23	CYP7B1
ENSG00000198535	11.4255	0	5.95341	1.75858e-05	0.000247544	C2CD4A
ENSG00000271503	575.674	9.26619	5.96355	9.7413e-10	3.68735e-08	CCL5
ENSG00000162892	25.7209	0.395999	5.96523	1.33304e-09	4.93818e-08	IL24
ENSG00000242113	17.8249	0.200512	6.01332	3.83112e-09	1.27616e-07	RN7SL124P
ENSG00000163673	986.446	15.1766	6.01495	1.82975e-53	1.86576e-50	DCLK3
ENSG00000125538	2388.9	35.9809	6.05347	1.14423e-09	4.26912e-08	IL1B
ENSG00000198797	19.0573	0.212715	6.11075	5.94382e-07	1.22762e-05	BRINP2
ENSG00000253522	71.2935	1.03917	6.14534	3.37299e-16	3.10718e-14	MIR3142HG
ENSG00000167207	20.7145	0.194988	6.23392	5.90187e-09	1.85326e-07	NOD2
ENSG00000163347	1580.81	20.9935	6.23672	1.25857e-51	1.13922e-48	CLDN1
ENSG00000259342	14.2686	0	6.27296	1.44905e-06	2.72764e-05	AC025580.1
ENSG00000196611	8720.89	104.936	6.37739	1.61385e-11	7.96179e-10	MMP1
ENSG00000104321	1308.47	14.6919	6.4805	1.07872e-134	1.1229e-130	TRPA1
ENSG00000162894	94.025	1.00549	6.55181	1.20463e-21	2.03896e-19	FCMR
ENSG00000234279	17.364	0	6.56059	9.99433e-11	4.38046e-09	LINC01937
ENSG00000169245	115.214	1.22903	6.56312	8.77405e-09	2.64352e-07	CXCL10
ENSG00000108691	19170.6	198.476	6.59427	1.30436e-59	1.69722e-56	CCL2
ENSG00000129988	193.425	1.98657	6.60139	4.74043e-12	2.59032e-10	LBP
ENSG00000170075	105.102	1.01747	6.707	1.21778e-16	1.19589e-14	GPR37L1
ENSG00000166670	155.927	1.43517	6.7756	4.06325e-09	1.34488e-07	MMP10
ENSG00000161270	20.2645	0	6.77599	6.22575e-09	1.94324e-07	NPHS1
ENSG00000092345	33.9554	0.212715	6.94595	4.80091e-12	2.6165e-10	DAZL
ENSG00000060558	109.978	0.762568	7.14369	6.67218e-07	1.35785e-05	GNA15
ENSG00000163435	248.061	1.66859	7.25741	3.72598e-27	9.01989e-25	ELF3
ENSG00000205358	31.0165	0	7.38857	2.0959e-11	1.02218e-09	MT1H
ENSG00000118113	51.8948	0.194988	7.55982	4.37273e-12	2.41474e-10	MMP8
ENSG00000262406	54.592	0.212715	7.63248	2.72901e-10	1.13178e-08	MMP12
ENSG00000149968	19858.4	91.3729	7.76399	4.04002e-08	1.08528e-06	MMP3
ENSG00000131203	42.4247	0	7.84387	6.55354e-11	2.98552e-09	IDO1
ENSG00000081041	4218.01	18.0314	7.87323	1.02585e-22	1.89001e-20	CXCL2
ENSG00000172156	602.169	2.44004	7.95271	3.71711e-14	2.60561e-12	CCL11
ENSG00000003989	105.285	0.3955	8.00194	8.11884e-09	2.47839e-07	SLC7A2
ENSG00000256597	71.6707	0.200512	8.0251	5.0075e-14	3.45203e-12	LINC02393
ENSG00000136695	444.049	1.68399	8.06791	5.20597e-14	3.577e-12	IL36RN
ENSG00000255921	54.1073	0	8.19743	7.00527e-16	6.28632e-14	AC026310.2
ENSG00000136689	2013.28	6.16873	8.35311	3.06784e-05	0.000403725	IL1RN
ENSG00000115009	328.722	0.999466	8.359	7.96484e-28	2.04716e-25	CCL20
ENSG00000173432	69.5102	0	8.55684	2.89743e-06	5.04361e-05	SAA1
ENSG00000258183	178.399	0.42543	8.76289	7.34291e-12	3.85068e-10	LINC02392
ENSG00000164400	88.437	0	8.90107	6.96266e-21	1.12369e-18	CSF2
ENSG00000206073	102.536	0	9.11848	1.56488e-16	1.51531e-14	SERPINB4
ENSG00000108688	168.277	0.212715	9.25649	6.23482e-23	1.18003e-20	CCL7
ENSG00000163735	45981.9	62.9166	9.51402	1.56125e-14	1.18627e-12	CXCL5
ENSG00000163739	51587.3	69.3066	9.54016	7.55533e-11	3.41203e-09	CXCL1
ENSG00000198417	1411.47	1.84277	9.60981	9.15673e-77	2.38292e-73	MT1F
ENSG00000166920	635.872	0.804478	9.63133	3.51231e-30	1.0299e-27	C15orf48
ENSG00000125144	1103.28	1.26486	9.82452	4.27603e-40	2.11959e-37	MT1G
ENSG00000163734	7581.56	7.5512	9.97458	3.55847e-26	8.05258e-24	CXCL3
ENSG00000124875	57380.5	54.2859	10.0466	1.58385e-18	2.02295e-16	CXCL6
ENSG00000169429	89414.9	83.482	10.0651	2.19874e-11	1.06952e-09	CXCL8
ENSG00000108700	415.013	0.194988	10.5577	5.92153e-14	4.05527e-12	CCL8
ENSG00000108342	2851.27	0	13.9152	8.45974e-44	5.87078e-41	CSF3

## Sheet: TGFB
gene_id	TGFb1	Control	log2FoldChange	pvalue	padj	gene_name
ENSG00000144057	69.2283	0	8.64024	8.89903e-08	1.43088e-06	ST6GAL2
ENSG00000132854	185.609	0.723925	7.97509	1.49521e-09	3.43296e-08	KANK4
ENSG00000179772	134.396	0.773442	7.47365	1.31023e-18	1.1706e-16	FOXS1
ENSG00000250038	52.789	0.383548	7.0976	4.18061e-11	1.27082e-09	AC109588.1
ENSG00000112559	19.0012	0	6.77967	2.99908e-06	3.35299e-05	MDFI
ENSG00000169067	27.5678	0.199975	6.7408	5.75193e-11	1.71548e-09	ACTBL2
ENSG00000174792	16.8882	0	6.60808	2.54872e-06	2.89838e-05	ODAPH
ENSG00000262061	30.0978	0.383158	6.28065	6.60879e-08	1.0908e-06	AC129507.1
ENSG00000227619	17.8424	0.172348	6.11113	4.38368e-09	9.2962e-08	AL391056.1
ENSG00000203857	17.5905	0.183184	6.08931	6.12949e-07	8.05854e-06	HSD3B1
ENSG00000178776	16.6681	0.189615	6.00308	1.8175e-08	3.3891e-07	C5orf46
ENSG00000159261	90.9624	1.5363	5.89697	3.96057e-07	5.47683e-06	CLDN14
ENSG00000146477	233.966	4.04118	5.8665	5.29095e-19	4.96456e-17	SLC22A3
ENSG00000255440	9.84132	0	5.82216	9.60662e-05	0.000718103	AP001085.1
ENSG00000251281	8.34844	0	5.59367	2.20099e-07	3.23985e-06	AC034223.2
ENSG00000228061	18.2717	0.400339	5.56495	5.28642e-08	8.96293e-07	AC131571.1
ENSG00000177614	24.9045	0.52788	5.486	1.99781e-07	2.9684e-06	PGBD5
ENSG00000235750	484.465	10.7934	5.48474	3.19926e-09	6.98637e-08	KIAA0040
ENSG00000134215	7.4932	0	5.44093	0.000605177	0.0035329	VAV3
ENSG00000227925	15.4958	0.389979	5.33813	1.53149e-06	1.83289e-05	LINC01655
ENSG00000162490	58.5337	1.53945	5.25899	1.68865e-05	0.000156448	DRAXIN
ENSG00000130762	157.324	4.34401	5.17937	5.0102e-22	6.64223e-20	ARHGEF16
ENSG00000187474	14.0549	0.383548	5.17926	3.26071e-05	0.000277796	FPR3
ENSG00000272398	64.8161	1.9277	5.08715	9.1946e-09	1.83081e-07	CD24
ENSG00000203805	385.434	11.8821	5.02049	1.58397e-61	4.64985e-58	PLPP4
ENSG00000184574	12.2035	0.383548	4.97885	5.01517e-05	0.000405895	LPAR5
ENSG00000248458	17.4881	0.579594	4.94954	8.37052e-07	1.06242e-05	AL139147.1
ENSG00000250064	11.3807	0.383548	4.88814	1.30002e-05	0.000124194	AC097480.1
ENSG00000123500	246.089	8.40751	4.87444	6.41154e-09	1.30705e-07	COL10A1
ENSG00000086991	262.009	8.88966	4.87165	1.19217e-35	5.97511e-33	NOX4
ENSG00000251095	5.01634	0	4.86382	5.12936e-05	0.000414646	AC097478.1
ENSG00000230838	93.915	3.23515	4.8616	0.000163188	0.001146	LINC01614
ENSG00000272636	21.5965	0.789538	4.82349	1.71142e-06	2.03049e-05	DOC2B
ENSG00000284418	4.83279	0	4.78753	0.00088992	0.0049053	AL391117.1
ENSG00000168675	1135.37	42.0229	4.75554	1.20515e-23	1.75636e-21	LDLRAD4
ENSG00000184486	14.832	0.566732	4.72158	6.84504e-06	7.0541e-05	POU3F2
ENSG00000173114	1724.77	65.9468	4.71057	2.06786e-35	1.01173e-32	LRRN3
ENSG00000244564	4.52735	0	4.6944	0.000846319	0.00470286	AC096888.1
ENSG00000272746	6.62495	0.189615	4.65837	9.62544e-05	0.000718725	AP005131.7
ENSG00000187634	783.668	31.1243	4.65128	3.01643e-37	1.77099e-34	SAMD11
ENSG00000134198	1413.8	56.7717	4.63655	5.87764e-34	2.46489e-31	TSPAN2
ENSG00000095752	1202.13	49.0792	4.61419	4.64919e-44	4.54934e-41	IL11
ENSG00000141052	290.564	12.2219	4.56661	1.83953e-17	1.42107e-15	MYOCD
ENSG00000095587	255.192	10.9097	4.54685	2.3704e-32	8.54551e-30	TLL2
ENSG00000076554	98.4777	4.242	4.52719	6.0433e-10	1.53124e-08	TPD52
ENSG00000138622	8.56118	0.344696	4.4686	0.000454309	0.00275956	HCN4
ENSG00000106537	121.105	5.51865	4.46245	1.32897e-13	6.06436e-12	TSPAN13
ENSG00000142178	54.4062	2.52228	4.44475	2.30541e-06	2.65103e-05	SIK1
ENSG00000267136	3.7537	0	4.43065	0.000486534	0.00292333	AP005131.1
ENSG00000183196	345.529	16.0619	4.42595	2.98831e-09	6.54657e-08	CHST6
ENSG00000172061	2689.99	126.438	4.41235	1.23941e-30	3.48886e-28	LRRC15
ENSG00000132031	884.123	42.0256	4.39076	1.12046e-33	4.42774e-31	MATN3
ENSG00000270562	11.5982	0.600704	4.32487	5.28376e-05	0.00042548	AC097634.1
ENSG00000267702	15.1681	0.773442	4.31484	1.18762e-06	1.45697e-05	AP005131.6
ENSG00000185477	7.59589	0.383158	4.30575	0.00146086	0.0075048	GPRIN3
ENSG00000232259	5.06078	0.172348	4.29685	0.000240256	0.00159208	AL158166.2
ENSG00000101463	470.853	23.9063	4.29499	7.51582e-16	4.84146e-14	SYNDIG1
ENSG00000249917	18.281	0.991074	4.2596	6.41221e-07	8.39264e-06	LINC00536
ENSG00000138650	1138.37	59.4754	4.25893	0.000678236	0.00390285	PCDH10
ENSG00000143768	18.3723	0.999873	4.25283	6.97397e-06	7.16884e-05	LEFTY2
ENSG00000155886	14.0331	0.734676	4.23491	0.0010575	0.00570647	SLC24A2
ENSG00000128045	62.0392	3.28539	4.21907	1.82076e-13	8.16916e-12	RASL11B
ENSG00000254605	7.03447	0.366367	4.19128	0.00107343	0.00577884	AP003555.2
ENSG00000075275	416.508	22.9261	4.18265	1.72654e-08	3.2312e-07	CELSR1
ENSG00000105509	645.722	37.951	4.09056	8.98984e-11	2.55733e-09	HAS1
ENSG00000165072	4226.17	249.734	4.0808	1.25699e-39	8.60999e-37	MAMDC2
ENSG00000238042	41.196	2.47795	4.06645	8.60533e-08	1.39237e-06	LINC02257
ENSG00000101280	4.27857	0.189615	4.05317	0.000972048	0.00530534	ANGPT4
ENSG00000145040	46.848	2.86879	4.04921	6.94854e-14	3.30522e-12	UCN2
ENSG00000167178	320.67	20.4284	3.97157	9.16471e-08	1.47129e-06	ISLR2
ENSG00000143473	162.052	10.2321	3.9682	1.04844e-21	1.36357e-19	KCNH1
ENSG00000139211	2174.16	145.326	3.90418	1.32457e-24	2.10997e-22	AMIGO2
ENSG00000146950	11.1563	0.717409	3.90361	2.33277e-05	0.000207247	SHROOM2
ENSG00000171617	4479.51	301.091	3.89552	3.95689e-24	5.89204e-22	ENC1
ENSG00000236546	5.5477	0.383548	3.84749	0.0011752	0.00624729	AL033527.2
ENSG00000081052	56.2415	3.93097	3.83357	7.72622e-06	7.84418e-05	COL4A4
ENSG00000108405	18.7228	1.31867	3.81965	9.17616e-07	1.15326e-05	P2RX1
ENSG00000169436	13.2896	0.962667	3.80943	4.87054e-05	0.000395436	COL22A1
ENSG00000163362	13.1069	0.9239	3.80399	5.32392e-05	0.000428185	INAVA
ENSG00000172137	15.984	1.17417	3.79455	0.000101539	0.000754349	CALB2
ENSG00000200033	12.9764	0.973417	3.78225	7.90584e-06	8.01466e-05	RNU6-403P
ENSG00000113070	241.382	17.6576	3.77775	2.01011e-28	4.58953e-26	HBEGF
ENSG00000142661	180.709	13.285	3.76844	9.34078e-21	1.06635e-18	MYOM3
ENSG00000117318	2039.29	150.156	3.76394	2.19963e-40	1.6143e-37	ID3
ENSG00000244649	58.0607	4.51744	3.68471	8.34781e-10	2.03245e-08	LINC02086
ENSG00000182585	116.754	9.18537	3.67444	1.524e-15	9.26526e-14	EPGN
ENSG00000184226	2391.96	192.481	3.63612	2.08983e-31	6.40953e-29	PCDH9
ENSG00000017427	58.5257	4.70938	3.63335	2.23121e-08	4.09002e-07	IGF1
ENSG00000229227	6.83655	0.52788	3.62797	0.000681138	0.00391736	AL356056.1
ENSG00000135636	1067.3	86.492	3.62487	2.2359e-26	4.25421e-24	DYSF
ENSG00000041982	7961.21	645.365	3.62474	4.3689e-09	9.27443e-08	TNC
ENSG00000174343	13.7213	1.13981	3.60256	1.08363e-06	1.33659e-05	CHRNA9
ENSG00000198417	20.7839	1.738	3.59466	5.83792e-06	6.11123e-05	MT1F
ENSG00000145681	3479.65	295.73	3.55628	5.12591e-35	2.44959e-32	HAPLN1
ENSG00000101306	11.1951	0.973417	3.55249	0.000885647	0.00488699	MYLK2
ENSG00000233818	24.4464	2.13614	3.53974	2.95318e-09	6.47651e-08	AP000695.2
ENSG00000114270	4592.28	395.958	3.5362	1.60568e-24	2.48083e-22	COL7A1
ENSG00000268941	26.5699	2.34122	3.5319	9.49486e-07	1.18969e-05	LINC01711
ENSG00000187867	15.0109	1.27348	3.52997	0.000188748	0.00129762	PALM3
ENSG00000179059	27.9656	2.4195	3.52708	0.000170353	0.00119128	ZFP42
ENSG00000158859	719.94	63.1402	3.51255	7.438e-15	4.04348e-13	ADAMTS4
ENSG00000138615	867.716	76.6607	3.50089	0.00132353	0.00692921	CILP
ENSG00000258976	19.1749	1.73024	3.48084	2.39668e-06	2.74522e-05	AC013451.2
ENSG00000174945	181.769	16.4607	3.46317	1.45745e-15	8.95669e-14	AMZ1
ENSG00000177234	8.39105	0.766706	3.45774	0.000586567	0.00343616	LINC01561
ENSG00000151136	41.7061	3.8549	3.44849	3.00196e-05	0.000258756	BTBD11
ENSG00000124216	422.141	38.8503	3.44292	1.15824e-25	2.01701e-23	SNAI1
ENSG00000137331	5550.09	512.22	3.43777	7.64916e-38	4.62302e-35	IER3
ENSG00000106366	140849	13091	3.42749	4.0413e-37	2.3068e-34	SERPINE1
ENSG00000184845	18.2125	1.68724	3.42223	0.000815356	0.00455416	DRD1
ENSG00000267287	30.2297	2.82688	3.41957	4.73504e-10	1.22237e-08	AC068473.3
ENSG00000130176	2079.66	197.409	3.39548	4.28307e-30	1.14302e-27	CNN1
ENSG00000250697	19.8616	1.9186	3.38888	3.16688e-07	4.48743e-06	AC010343.3
ENSG00000060718	4514.86	431.384	3.38757	1.88141e-17	1.44798e-15	COL11A1
ENSG00000099282	88.2215	8.51975	3.38543	7.42838e-12	2.55261e-10	TSPAN15
ENSG00000169994	410.306	39.8046	3.3639	1.21358e-06	1.47912e-05	MYO7B
ENSG00000123329	24.8258	2.39485	3.35756	4.03942e-08	7.03442e-07	ARHGAP9
ENSG00000102468	442.812	43.7674	3.33937	4.32041e-17	3.17072e-15	HTR2A
ENSG00000171051	22.974	2.30733	3.32184	0.000613969	0.00357609	FPR1
ENSG00000115884	7090.68	724.716	3.29056	1.85174e-40	1.40931e-37	SDC1
ENSG00000124225	2853.05	292.924	3.28444	2.69052e-64	9.21457e-61	PMEPA1
ENSG00000272088	14.4612	1.50656	3.25533	0.00013151	0.000945227	AL512413.1
ENSG00000140416	41897.4	4422.72	3.24378	5.96323e-87	1.22538e-82	TPM1
ENSG00000060140	21.3126	2.25678	3.23314	1.25199e-07	1.94477e-06	STYK1
ENSG00000198959	4431.25	479.971	3.2069	8.93136e-13	3.64148e-11	TGM2
ENSG00000118523	100384	11199.3	3.16401	1.69433e-56	3.16517e-53	CTGF
ENSG00000234840	62.52	7.30881	3.10842	9.62095e-15	5.13509e-13	LINC01239
ENSG00000166670	11.3914	1.35304	3.10389	0.00169574	0.00849484	MMP10
ENSG00000162267	35.114	4.22592	3.06427	8.19033e-09	1.64198e-07	ITIH3
ENSG00000120708	196417	24283.2	3.01589	3.65214e-17	2.71913e-15	TGFBI
ENSG00000235205	31.7981	3.92856	3.01251	4.61084e-08	7.92209e-07	TATDN2P3
ENSG00000147883	8439.4	1047.74	3.01026	3.74841e-79	2.56754e-75	CDKN2B
ENSG00000138135	284.877	35.5002	3.00807	1.10329e-28	2.60593e-26	CH25H
ENSG00000272789	53.9542	6.64027	3.00771	1.2767e-08	2.44273e-07	AC010976.2
ENSG00000107796	7599.78	946.664	3.00503	3.20624e-41	2.53404e-38	ACTA2
ENSG00000275993	147.689	18.7257	2.98084	1.07208e-13	4.93952e-12	SIK1B
ENSG00000183688	3232.89	409.877	2.97985	3.40703e-28	7.69353e-26	RFLNB
ENSG00000122877	147.755	19.0202	2.9638	1.88538e-18	1.65567e-16	EGR2
ENSG00000183715	1562.26	201.445	2.9555	1.7688e-18	1.55996e-16	OPCML
ENSG00000118785	728.216	96.0397	2.92314	0.000453651	0.00275638	SPP1
ENSG00000116701	67.215	8.94909	2.90498	8.08645e-07	1.02891e-05	NCF2
ENSG00000250320	39.3261	5.37774	2.87862	5.35025e-06	5.64675e-05	AC113383.1
ENSG00000147234	45.7975	6.20094	2.8736	3.92605e-05	0.000327421	FRMPD3
ENSG00000104881	1949.32	268.277	2.8601	5.53286e-30	1.45763e-27	PPP1R13L
ENSG00000170396	8.07716	1.14577	2.84162	0.000572159	0.00336596	ZNF804A
ENSG00000260549	27.4976	3.84983	2.83163	0.000136319	0.000974674	MT1L
ENSG00000198948	1783.38	250.716	2.83113	2.69743e-47	3.26055e-44	MFAP3L
ENSG00000132434	2485.15	351.259	2.82257	1.78148e-34	7.91737e-32	LANCL2
ENSG00000225177	138.216	19.7199	2.81329	6.08764e-27	1.22642e-24	FLJ46906
ENSG00000170390	907.646	129.837	2.80509	7.65717e-32	2.53786e-29	DCLK2
ENSG00000230479	28.2208	4.08182	2.8018	4.88075e-06	5.18854e-05	AP000695.1
ENSG00000279415	44.6978	6.52861	2.77588	1.09973e-10	3.06627e-09	AC099494.2
ENSG00000197361	52.591	7.86596	2.75573	1.39771e-12	5.51276e-11	FBXL22
ENSG00000180139	32.4452	4.84373	2.75426	1.03322e-05	0.000100863	ACTA2-AS1
ENSG00000159251	79.9808	11.8513	2.75409	1.09628e-05	0.000106212	ACTC1
ENSG00000158869	22.8161	3.45836	2.73674	3.76197e-06	4.09236e-05	FCER1G
ENSG00000047936	42.1831	6.31806	2.73373	1.36772e-07	2.11318e-06	ROS1
ENSG00000132003	363.601	55.3943	2.71668	3.3275e-25	5.60465e-23	ZSWIM4
ENSG00000115844	8.50622	1.30093	2.69802	0.00190823	0.00936961	DLX2
ENSG00000149591	25874	4000.85	2.69307	1.95354e-18	1.70823e-16	TAGLN
ENSG00000248187	359.196	55.8818	2.68295	0.00036597	0.0022921	AC078850.1
ENSG00000139269	334.609	52.4968	2.67033	8.55208e-10	2.07481e-08	INHBE
ENSG00000165617	4413.68	694.124	2.66833	7.84633e-60	2.01543e-56	DACT1
ENSG00000017483	1120.06	177.108	2.66069	1.08082e-05	0.000104813	SLC38A5
ENSG00000099860	1985.86	315.343	2.65406	1.36316e-30	3.78535e-28	GADD45B
ENSG00000101670	619.407	99.5092	2.63915	2.96957e-12	1.09358e-10	LIPG
ENSG00000203721	36.0712	5.78357	2.63255	2.03147e-09	4.5823e-08	LINC00862
ENSG00000187498	45481.6	7488.44	2.60254	6.00796e-45	6.17288e-42	COL4A1
ENSG00000170681	122.653	20.2874	2.59803	1.99334e-08	3.69352e-07	CAVIN4
ENSG00000055813	255.041	42.3766	2.58827	2.46038e-11	7.76624e-10	CCDC85A
ENSG00000149380	1042.84	174.564	2.57922	1.29606e-10	3.58449e-09	P4HA3
ENSG00000155629	12.2431	2.07713	2.56966	0.000334544	0.00213032	PIK3AP1
ENSG00000107957	35892.1	6066.29	2.56478	6.76445e-25	1.09451e-22	SH3PXD2A
ENSG00000112183	395.623	66.9963	2.56176	7.41654e-21	8.70872e-19	RBM24
ENSG00000279821	213.278	36.3049	2.54854	7.35687e-17	5.26747e-15	AC145098.2
ENSG00000223764	304.531	53.0017	2.52085	6.40021e-09	1.30604e-07	LINC02593
ENSG00000175183	634.81	112.667	2.49341	1.0122e-08	1.98145e-07	CSRP2
ENSG00000182541	2095.83	374.05	2.48662	5.09902e-37	2.83189e-34	LIMK2
ENSG00000143153	694.891	123.948	2.4854	2.03614e-09	4.58778e-08	ATP1B1
ENSG00000223969	13.7842	2.45299	2.48067	3.10121e-05	0.000266416	AC002456.1
ENSG00000103489	5432.77	974.06	2.47998	2.48237e-40	1.75898e-37	XYLT1
ENSG00000275342	464.734	83.7297	2.47013	6.73113e-10	1.68886e-08	PRAG1
ENSG00000138623	6217.51	1126.38	2.46468	2.35655e-14	1.16968e-12	SEMA7A
ENSG00000164465	2091.25	382.98	2.44943	4.40587e-31	1.33141e-28	DCBLD1
ENSG00000144655	600.228	110.439	2.44573	2.67717e-50	3.66755e-47	CSRNP1
ENSG00000135905	2538.12	470.86	2.43072	6.28455e-24	9.29074e-22	DOCK10
ENSG00000259370	24.1615	4.53436	2.41091	0.000135434	0.000970505	AC103740.1
ENSG00000233098	96.2007	18.1456	2.40724	1.50051e-11	4.87085e-10	CCDC144NL-AS1
ENSG00000249628	17.8072	3.31936	2.40703	2.91913e-05	0.000252569	LINC00942
ENSG00000258777	13.8659	2.64693	2.39115	4.32363e-05	0.000356961	HIF1A-AS1
ENSG00000125148	4170.14	799.981	2.38226	3.70369e-11	1.13423e-09	MT2A
ENSG00000249669	657.786	126.468	2.37883	1.03012e-07	1.62956e-06	CARMN
ENSG00000158008	228.265	43.9511	2.37691	1.835e-05	0.000167589	EXTL1
ENSG00000163673	74.4306	14.299	2.37461	2.70404e-05	0.000235746	DCLK3
ENSG00000152952	9271.89	1788.83	2.37396	3.40949e-24	5.14357e-22	PLOD2
ENSG00000158825	69.7691	13.4643	2.36797	6.00111e-07	7.93544e-06	CDA
ENSG00000254535	260.289	50.8734	2.35641	2.0349e-11	6.52344e-10	PABPC4L
ENSG00000259498	79.3443	15.5874	2.35064	2.81467e-12	1.04591e-10	TPM1-AS
ENSG00000099812	43.1554	8.4764	2.34102	0.000156032	0.00110182	MISP
ENSG00000085741	296.062	58.7694	2.33436	7.58458e-10	1.87326e-08	WNT11
ENSG00000122641	11464.9	2293.11	2.32191	6.72819e-16	4.36144e-14	INHBA
ENSG00000233682	34.0455	6.82826	2.31761	1.07793e-07	1.69865e-06	AL356417.2
ENSG00000285294	76.7847	15.487	2.304	3.52876e-05	0.000298037	LINC00842
ENSG00000136603	3598.38	729.429	2.30264	1.54787e-34	7.06828e-32	SKIL
ENSG00000157554	241.848	49.7323	2.2846	2.6054e-10	6.98935e-09	ERG
ENSG00000070371	1165.92	241.011	2.27404	1.32833e-51	2.27465e-48	CLTCL1
ENSG00000229647	39.6713	8.19966	2.26738	2.11759e-11	6.7569e-10	MYOSLID
ENSG00000212541	7.2749	1.51144	2.26698	0.00169766	0.00849822	RNU6-510P
ENSG00000164161	88.2854	18.5187	2.25736	7.00479e-05	0.000544202	HHIP
ENSG00000232774	44.6923	9.35328	2.25402	0.000538501	0.00319079	FLJ22447
ENSG00000135074	2028.44	426.39	2.24997	1.1652e-15	7.23376e-14	ADAM19
ENSG00000157168	1875.36	396.07	2.24285	3.63252e-10	9.52099e-09	NRG1
ENSG00000115129	2013.79	428.59	2.23216	2.36974e-20	2.58253e-18	TP53I3
ENSG00000164687	164.504	35.1219	2.22792	2.02501e-05	0.000182749	FABP5
ENSG00000135362	222.877	47.6474	2.22781	1.08975e-10	3.04671e-09	PRR5L
ENSG00000149596	474.451	101.615	2.22123	5.85046e-10	1.48605e-08	JPH2
ENSG00000074590	5121.9	1103.36	2.21465	1.85498e-20	2.04935e-18	NUAK1
ENSG00000277758	236.734	51.1662	2.20955	3.81572e-06	4.14438e-05	FO681492.1
ENSG00000171951	423.534	91.6857	2.20914	3.4588e-05	0.000292851	SCG2
ENSG00000156453	287.4	62.333	2.20321	8.17487e-05	0.000622168	PCDH1
ENSG00000128487	949.553	206.422	2.20246	9.87514e-09	1.94932e-07	SPECC1
ENSG00000276365	13.7224	2.94319	2.19851	0.000967071	0.00528379	MIR145
ENSG00000230417	133.521	29.1026	2.19547	1.60413e-07	2.43631e-06	LINC00856
ENSG00000189423	23.4163	5.10118	2.1943	3.72944e-06	4.05912e-05	USP32P3
ENSG00000280143	240.419	53.2518	2.1711	3.54318e-07	4.93953e-06	AP000892.3
ENSG00000165434	919.685	204.67	2.16853	3.41665e-10	8.9896e-09	PGM2L1
ENSG00000182379	550.442	122.909	2.16126	1.09634e-21	1.4169e-19	NXPH4
ENSG00000122644	528.011	118.677	2.15405	6.98795e-14	3.31629e-12	ARL4A
ENSG00000132000	1126.65	253.899	2.14876	4.00695e-17	2.95883e-15	PODNL1
ENSG00000261039	14.1461	3.22431	2.13549	0.000877031	0.00484907	LINC02544
ENSG00000175315	12.9221	2.99766	2.11952	0.000215131	0.00144942	CST6
ENSG00000166002	356.43	82.3412	2.11168	3.42109e-13	1.46764e-11	SMCO4
ENSG00000171790	22.043	5.11521	2.10991	3.67263e-06	4.00578e-05	SLFNL1
ENSG00000117586	175.027	40.7467	2.10391	0.000448132	0.00273092	TNFSF4
ENSG00000157680	863.925	201.291	2.10261	9.02679e-10	2.17969e-08	DGKI
ENSG00000148948	10.5055	2.40888	2.10213	0.00068947	0.00395457	LRRC4C
ENSG00000171793	1200.44	281.051	2.09426	8.9901e-32	2.84212e-29	CTPS1
ENSG00000156103	731.401	171.459	2.09422	5.60025e-15	3.10187e-13	MMP16
ENSG00000065413	955.637	225.237	2.08555	1.0125e-33	4.07959e-31	ANKRD44
ENSG00000103522	388.529	91.6668	2.08417	2.26282e-11	7.18196e-10	IL21R
ENSG00000143061	60.3106	14.1818	2.08291	0.000260792	0.00171364	IGSF3
ENSG00000185437	45.7062	10.7381	2.0816	6.682e-05	0.000524078	SH3BGR
ENSG00000257219	16.5795	3.93107	2.07797	0.000198814	0.00135414	LINC02407
ENSG00000245275	56.3542	13.4246	2.07067	5.84986e-05	0.000465745	SAP30L-AS1
ENSG00000134107	5729.2	1367.16	2.06733	1.32743e-32	4.95952e-30	BHLHE40
ENSG00000146674	107653	25751.9	2.06363	0.000468543	0.00283346	IGFBP3
ENSG00000273108	17.9479	4.28095	2.05837	1.63863e-05	0.00015257	AL121929.2
ENSG00000281207	30.8522	7.37592	2.05795	4.77692e-07	6.45371e-06	SLFNL1-AS1
ENSG00000148677	1922.9	462.197	2.05653	1.36442e-05	0.000129563	ANKRD1
ENSG00000054967	124.308	30.0743	2.05218	4.63968e-11	1.40099e-09	RELT
ENSG00000278709	22.7741	5.52457	2.04414	4.66193e-07	6.32329e-06	NKILA
ENSG00000100558	68.8313	16.777	2.04402	3.41541e-05	0.000289662	PLEK2
ENSG00000164093	949.814	230.422	2.0436	2.13589e-15	1.26122e-13	PITX2
ENSG00000102683	652.747	158.745	2.03954	4.40959e-05	0.000363032	SGCG
ENSG00000082497	382.415	93.0571	2.03814	3.51547e-05	0.000297159	SERTAD4
ENSG00000225166	8.50704	2.06772	2.03607	0.00165154	0.00831801	AC012462.1
ENSG00000115318	2008.97	490.154	2.03552	3.70456e-08	6.51236e-07	LOXL3
ENSG00000164574	6979.84	1705.6	2.03296	1.81087e-34	7.91737e-32	GALNT10
ENSG00000176170	3118.37	762.703	2.03184	1.58001e-15	9.54929e-14	SPHK1
ENSG00000154330	143.685	35.2502	2.03073	1.06639e-06	1.31769e-05	PGM5
ENSG00000103257	8236.18	2017.32	2.02941	1.88176e-13	8.42444e-12	SLC7A5
ENSG00000196557	178.431	43.6721	2.02884	0.00041779	0.00257504	CACNA1H
ENSG00000164694	5702.79	1403.08	2.02302	4.48476e-08	7.74432e-07	FNDC1
ENSG00000257335	17.081	4.23988	2.01652	0.0010599	0.00571652	MGAM
ENSG00000254510	21.6981	5.31982	2.01616	7.67461e-05	0.000588893	AP001107.5
ENSG00000227218	30.7541	7.60329	2.01593	3.13546e-05	0.000268909	AL157935.1
ENSG00000214517	2170.79	538.052	2.01204	4.59252e-18	3.89966e-16	PPME1
ENSG00000153976	528.516	131.49	2.00839	1.58736e-17	1.25941e-15	HS3ST3A1
ENSG00000117479	748.256	187.142	2.00009	6.0963e-23	8.40757e-21	SLC19A2
ENSG00000006327	4459.38	1125.07	1.98662	2.11547e-15	1.25276e-13	TNFRSF12A
ENSG00000111087	72.9442	18.3591	1.98385	4.76897e-05	0.000387955	GLI1
ENSG00000110328	43.7432	11.0543	1.9799	0.000795317	0.00446773	GALNT18
ENSG00000149201	44.208	11.1607	1.97952	2.09374e-08	3.85868e-07	CCDC81
ENSG00000256894	31.1557	7.92106	1.97878	2.38299e-06	2.73107e-05	AC022509.3
ENSG00000152049	2446.27	622.034	1.97572	1.61997e-13	7.31621e-12	KCNE4
ENSG00000119681	96120.1	24463.7	1.9742	7.32497e-10	1.82008e-08	LTBP2
ENSG00000130635	103176	26349.9	1.96923	6.11661e-32	2.09484e-29	COL5A1
ENSG00000198467	26112.6	6674.06	1.96808	9.18573e-22	1.20998e-19	TPM2
ENSG00000084710	142.095	36.4906	1.96715	2.14618e-07	3.16564e-06	EFR3B
ENSG00000171310	1489.58	381.846	1.96456	3.48981e-15	2.00874e-13	CHST11
ENSG00000124813	227.795	58.8247	1.95584	1.10933e-07	1.74546e-06	RUNX2
ENSG00000039068	39.9812	10.2474	1.95288	2.25621e-06	2.60028e-05	CDH1
ENSG00000125968	266.547	68.8431	1.95228	1.58934e-06	1.89439e-05	ID1
ENSG00000160161	18.0389	4.71064	1.95035	4.15206e-05	0.000345009	CILP2
ENSG00000260604	270.952	70.2527	1.94484	2.28419e-07	3.34553e-06	AL590004.3
ENSG00000011422	1482.48	387.556	1.93589	2.81771e-09	6.21256e-08	PLAUR
ENSG00000097096	340.062	89.0403	1.93321	1.81174e-17	1.4102e-15	SYDE2
ENSG00000165495	183.678	48.0972	1.93172	2.82998e-27	5.86723e-25	PKNOX2
ENSG00000152422	318.305	83.8493	1.92665	1.09337e-06	1.34698e-05	XRCC4
ENSG00000236364	15.8699	4.15418	1.92595	9.84099e-05	0.00073216	AL358115.1
ENSG00000189420	25.9725	6.82466	1.92021	0.00153022	0.00780068	ZFP92
ENSG00000111424	2661.74	703.935	1.91909	2.32872e-24	3.57111e-22	VDR
ENSG00000111859	1014.35	269.226	1.91289	1.27236e-11	4.20348e-10	NEDD9
ENSG00000159263	245.088	65.0976	1.91203	0.000581197	0.00341034	SIM2
ENSG00000158050	104.496	27.8606	1.90777	2.21183e-12	8.40126e-11	DUSP2
ENSG00000154127	658.522	176.737	1.89809	3.34358e-11	1.03164e-09	UBASH3B
ENSG00000156113	3555.29	955.095	1.8959	1.1519e-18	1.04274e-16	KCNMA1
ENSG00000128965	1252.28	337.398	1.89098	1.87297e-14	9.4564e-13	CHAC1
ENSG00000231290	298.557	80.74	1.88896	5.3407e-07	7.11712e-06	APCDD1L-DT
ENSG00000138696	256.974	69.7923	1.88205	2.67799e-26	5.04862e-24	BMPR1B
ENSG00000159216	6729.62	1838.35	1.87222	2.96208e-21	3.68896e-19	RUNX1
ENSG00000117394	1784.32	489.385	1.86627	1.09188e-10	3.04851e-09	SLC2A1
ENSG00000113448	172.444	47.4737	1.86318	6.83316e-07	8.89263e-06	PDE4D
ENSG00000206190	2520.86	694.14	1.86053	2.16426e-10	5.85948e-09	ATP10A
ENSG00000164106	866.388	239.18	1.85701	1.68126e-05	0.000155903	SCRG1
ENSG00000081051	35.4798	9.77199	1.84462	1.85587e-05	0.000169194	AFP
ENSG00000173334	254.691	71.0424	1.84428	5.65544e-08	9.49458e-07	TRIB1
ENSG00000166257	26.3223	7.35049	1.83971	3.38606e-07	4.76249e-06	SCN3B
ENSG00000066468	36.5906	10.2685	1.83516	0.00122446	0.00648158	FGFR2
ENSG00000182667	2044.72	574.417	1.83201	6.8751e-19	6.36381e-17	NTM
ENSG00000233901	414.052	116.566	1.82849	1.22806e-18	1.10199e-16	LINC01503
ENSG00000229373	14.1086	3.9656	1.8204	0.00135193	0.00704558	LINC00452
ENSG00000134830	31.933	9.10864	1.81432	0.0017245	0.00860536	C5AR2
ENSG00000101333	143.993	41.0575	1.81377	2.43917e-07	3.54976e-06	PLCB4
ENSG00000170537	37.9002	10.8392	1.81302	0.00015852	0.00111786	TMC7
ENSG00000138311	96.1457	27.4911	1.80728	4.309e-05	0.000356177	ZNF365
ENSG00000251493	854.104	245.061	1.802	9.97625e-09	1.96174e-07	FOXD1
ENSG00000074370	80.3527	23.0027	1.80067	0.000297634	0.00192026	ATP2A3
ENSG00000145431	1783.75	513.335	1.79741	1.76607e-09	4.01893e-08	PDGFC
ENSG00000170485	904.934	261.279	1.79273	9.17988e-07	1.15326e-05	NPAS2
ENSG00000213190	599.132	173.984	1.78458	4.29758e-06	4.61395e-05	MLLT11
ENSG00000134871	44645.1	12997.7	1.78023	1.06443e-19	1.07749e-17	COL4A2
ENSG00000185420	711.42	207.563	1.77837	7.21465e-21	8.52034e-19	SMYD3
ENSG00000061337	62.8801	18.5543	1.76254	0.000946828	0.00518698	LZTS1
ENSG00000147224	3360.32	991.045	1.76135	1.34199e-06	1.62406e-05	PRPS1
ENSG00000154898	14.7193	4.3485	1.76126	0.000726928	0.00413327	CCDC144CP
ENSG00000095303	4964.42	1472.47	1.75347	0.000126809	0.000913978	PTGS1
ENSG00000167034	193.743	57.8703	1.74579	7.2059e-32	2.42744e-29	NKX3-1
ENSG00000182578	38.8557	11.6463	1.74398	2.45089e-06	2.79641e-05	CSF1R
ENSG00000155090	769.256	230.286	1.74126	6.0498e-14	2.91141e-12	KLF10
ENSG00000233251	53.5989	16.0679	1.73687	0.000116149	0.00084711	AC007743.1
ENSG00000232004	48.3329	14.5922	1.73505	1.35252e-09	3.13689e-08	CAP1P2
ENSG00000183876	147.488	44.4267	1.73377	0.000113403	0.000830772	ARSI
ENSG00000117877	152.794	45.954	1.73145	6.74991e-08	1.10963e-06	CD3EAP
ENSG00000135919	111224	33595.1	1.72715	3.45481e-15	1.99418e-13	SERPINE2
ENSG00000177425	2657.26	802.423	1.72707	5.86033e-31	1.72034e-28	PAWR
ENSG00000113140	192236	58094.9	1.72638	4.78173e-15	2.69205e-13	SPARC
ENSG00000179715	88.6653	26.936	1.72459	1.3711e-07	2.11682e-06	PCED1B
ENSG00000138685	10008	3034.42	1.72163	2.07658e-12	7.94631e-11	FGF2
ENSG00000111186	1686.18	512.072	1.71952	1.717e-05	0.00015836	WNT5B
ENSG00000260910	124.028	37.6448	1.71615	2.29882e-09	5.13461e-08	LINC00565
ENSG00000168994	4780.91	1461.24	1.7099	2.10665e-14	1.05327e-12	PXDC1
ENSG00000072110	22095.4	6799.9	1.70015	1.03581e-18	9.41807e-17	ACTN1
ENSG00000112186	1434.46	443.44	1.69324	1.57958e-12	6.15916e-11	CAP2
ENSG00000198853	6093.79	1886.27	1.69164	1.81017e-42	1.61727e-39	RUSC2
ENSG00000198768	1917.31	595.526	1.68709	1.19924e-06	1.46511e-05	APCDD1L
ENSG00000198053	7670.08	2382.7	1.68666	7.8907e-26	1.43492e-23	SIRPA
ENSG00000177283	1561.35	485.163	1.68592	1.70412e-16	1.16727e-14	FZD8
ENSG00000143179	2409.16	750.318	1.68259	2.93098e-26	5.426e-24	UCK2
ENSG00000168811	24.0757	7.55034	1.68031	2.20166e-05	0.000197048	IL12A
ENSG00000283154	233.269	72.7859	1.67646	1.35176e-12	5.34178e-11	IQCJ-SCHIP1
ENSG00000164932	7056.58	2215.91	1.67115	6.16123e-08	1.02599e-06	CTHRC1
ENSG00000121281	1555.32	491.095	1.66333	4.50647e-12	1.61894e-10	ADCY7
ENSG00000102452	393.932	124.417	1.66307	9.49305e-10	2.2655e-08	NALCN
ENSG00000223749	956.951	302.593	1.66076	0.000342204	0.00216969	MIR503HG
ENSG00000107731	9092.86	2879.75	1.65871	1.71198e-27	3.7031e-25	UNC5B
ENSG00000276649	28.5946	9.01528	1.65503	1.75366e-06	2.07103e-05	AL117335.1
ENSG00000197646	366.827	117.155	1.64813	3.80622e-09	8.1643e-08	PDCD1LG2
ENSG00000100600	9110.1	2909.87	1.64643	2.89915e-18	2.50314e-16	LGMN
ENSG00000039560	4954.95	1585.01	1.64447	4.06686e-34	1.74104e-31	RAI14
ENSG00000106003	265.415	84.7688	1.64415	6.91131e-09	1.39922e-07	LFNG
ENSG00000197859	25.9255	8.30208	1.63947	0.00195625	0.00956892	ADAMTSL2
ENSG00000134285	1047.41	339.295	1.62754	8.75928e-33	3.33323e-30	FKBP11
ENSG00000187605	456.714	147.705	1.62742	7.44332e-10	1.84503e-08	TET3
ENSG00000227036	36.4319	11.9001	1.62627	0.000738353	0.00419169	LINC00511
ENSG00000249035	25.0382	8.03651	1.6214	7.07277e-05	0.000548861	CLMAT3
ENSG00000206432	34.8824	11.3682	1.62049	0.00178076	0.00882395	TMEM200C
ENSG00000166016	635.033	206.691	1.6203	1.62385e-13	7.31764e-12	ABTB2
ENSG00000171608	634.578	206.93	1.6174	6.57767e-18	5.47224e-16	PIK3CD
ENSG00000054277	108.203	35.0999	1.61668	3.25906e-06	3.60249e-05	OPN3
ENSG00000133816	13236.2	4320.1	1.61535	1.52987e-12	5.98807e-11	MICAL2
ENSG00000145088	13.2687	4.33063	1.61329	0.000689189	0.00395457	EAF2
ENSG00000163393	579.613	189.709	1.60978	6.99116e-25	1.12235e-22	SLC22A15
ENSG00000165323	300.745	98.8094	1.60626	0.000236622	0.00157379	FAT3
ENSG00000072682	4708.39	1552.06	1.60107	2.00901e-47	2.5802e-44	P4HA2
ENSG00000164976	243.602	80.7572	1.5927	3.19818e-10	8.4581e-09	MYORG
ENSG00000070404	4114.33	1369.67	1.58674	4.96274e-06	5.26753e-05	FSTL3
ENSG00000167641	630.192	209.643	1.58672	2.20536e-06	2.55312e-05	PPP1R14A
ENSG00000223485	138.05	45.9559	1.58478	0.000697274	0.00398672	LINC01615
ENSG00000100003	211.897	70.8806	1.58352	8.65453e-10	2.09719e-08	SEC14L2
ENSG00000107249	947.306	316.721	1.5806	1.35257e-13	6.13555e-12	GLIS3
ENSG00000147100	991.388	331.645	1.58032	3.34307e-07	4.70849e-06	SLC16A2
ENSG00000157193	989.945	331.412	1.57887	2.20813e-06	2.55489e-05	LRP8
ENSG00000168389	43.769	14.6298	1.57862	0.000236195	0.00157328	MFSD2A
ENSG00000173848	602.564	202.275	1.57514	5.4748e-11	1.63758e-09	NET1
ENSG00000284753	27.4587	9.1845	1.57026	0.000368821	0.00230923	EEF1AKMT4
ENSG00000187840	1760.01	593.591	1.56754	5.91912e-11	1.76278e-09	EIF4EBP1
ENSG00000236404	79.7064	26.8992	1.5631	0.000737501	0.00418876	VLDLR-AS1
ENSG00000155304	3470.67	1180.99	1.55526	1.86819e-27	3.95768e-25	HSPA13
ENSG00000067057	3714.97	1268.2	1.55053	1.17888e-16	8.21181e-15	PFKP
ENSG00000117519	10791.8	3688.99	1.54862	6.1519e-30	1.6002e-27	CNN3
ENSG00000271303	777.217	265.796	1.54747	3.79955e-05	0.000318032	SRXN1
ENSG00000147852	899.376	307.565	1.54737	2.93128e-09	6.44224e-08	VLDLR
ENSG00000143013	2463.92	844.934	1.54445	1.02309e-41	8.75982e-39	LMO4
ENSG00000158560	133.035	45.9785	1.532	3.50366e-07	4.90775e-06	DYNC1I1
ENSG00000149428	4838.69	1682.59	1.52397	1.33599e-26	2.56573e-24	HYOU1
ENSG00000120802	2199.02	765.616	1.52176	1.73064e-15	1.0365e-13	TMPO
ENSG00000156466	1193.3	415.511	1.52166	0.0013763	0.00714364	GDF6
ENSG00000128656	694.967	242.103	1.52153	8.65393e-06	8.68733e-05	CHN1
ENSG00000131435	1368.8	477.023	1.52029	4.44027e-33	1.72157e-30	PDLIM4
ENSG00000182492	23559.6	8225.6	1.51811	4.56012e-17	3.33473e-15	BGN
ENSG00000144583	1790.69	626.415	1.51489	8.92215e-09	1.78174e-07	2004-03-01
ENSG00000137267	835.139	292.085	1.51483	2.59524e-19	2.48045e-17	TUBB2A
ENSG00000135048	1739.14	611.698	1.50788	6.72633e-12	2.33479e-10	CEMIP2
ENSG00000096696	7904.91	2783.02	1.50609	2.98141e-14	1.46217e-12	DSP
ENSG00000106683	2676.07	942.701	1.50559	7.06106e-11	2.06692e-09	LIMK1
ENSG00000121904	374.163	131.863	1.50386	9.833e-07	1.22683e-05	CSMD2
ENSG00000188662	17.6743	6.23516	1.50296	0.000116595	0.000849009	HILS1
ENSG00000176971	1345.92	476.813	1.49781	3.7358e-20	3.97757e-18	FIBIN
ENSG00000172575	29.802	10.6692	1.49134	2.03231e-06	2.37284e-05	RASGRP1
ENSG00000149571	320.435	114.142	1.48597	9.24541e-10	2.22464e-08	KIRREL3
ENSG00000171223	1421.6	508.843	1.48267	1.22538e-14	6.39094e-13	JUNB
ENSG00000213626	1243.66	447.792	1.47303	3.0489e-07	4.33576e-06	LBH
ENSG00000148158	1715.45	618.259	1.47282	3.95732e-39	2.54122e-36	SNX30
ENSG00000071282	3346.28	1206.19	1.47197	1.25282e-05	0.000120122	LMCD1
ENSG00000101665	2393.14	865.954	1.46674	3.1983e-06	3.55258e-05	SMAD7
ENSG00000230082	18.3344	6.72261	1.46386	0.000715606	0.00407792	PRRT3-AS1
ENSG00000137124	1377.99	501.563	1.45818	1.89855e-13	8.48116e-12	ALDH1B1
ENSG00000049192	530.739	193.678	1.4561	2.94876e-08	5.31061e-07	ADAMTS6
ENSG00000272168	36.7279	13.3853	1.45399	0.00137229	0.0071318	CASC15
ENSG00000127328	122.633	44.8762	1.44882	0.000160882	0.00113179	RAB3IP
ENSG00000259287	19.6449	7.23002	1.44449	0.000354759	0.00223139	AC010809.1
ENSG00000143341	3445.35	1266.77	1.44379	1.04338e-08	2.03614e-07	HMCN1
ENSG00000142303	1572.78	579.111	1.44144	3.95303e-08	6.89566e-07	ADAMTS10
ENSG00000166123	693.907	256.563	1.43323	8.38068e-19	7.72263e-17	GPT2
ENSG00000139174	611.785	226.809	1.4317	8.78637e-05	0.000663303	PRICKLE1
ENSG00000143797	2916.51	1086.18	1.42477	7.48312e-14	3.52685e-12	MBOAT2
ENSG00000196923	7218.37	2696.1	1.4206	1.69192e-17	1.33208e-15	PDLIM7
ENSG00000006451	4486.67	1679.14	1.41799	1.96103e-19	1.90982e-17	RALA
ENSG00000162591	9965.86	3734.97	1.41585	4.51443e-08	7.78246e-07	MEGF6
ENSG00000125398	1038.8	391.221	1.40914	6.14172e-05	0.000486244	SOX9
ENSG00000198018	652.781	246.059	1.40796	8.99777e-11	2.55733e-09	ENTPD7
ENSG00000151414	17539.8	6611.19	1.40759	6.65375e-15	3.65583e-13	NEK7
ENSG00000166741	8241.24	3116.24	1.40305	1.34826e-17	1.07803e-15	NNMT
ENSG00000115419	15504.4	5864.94	1.40243	4.9338e-12	1.7571e-10	GLS
ENSG00000172986	725.811	274.8	1.40223	1.90823e-09	4.32328e-08	GXYLT2
ENSG00000159176	9219.82	3490.1	1.40143	2.11725e-12	8.08686e-11	CSRP1
ENSG00000064652	363.921	137.821	1.40046	1.61512e-12	6.23854e-11	SNX24
ENSG00000074047	1420.28	539.432	1.39649	1.79693e-20	1.99595e-18	GLI2
ENSG00000170624	4255.74	1617.42	1.39567	3.21396e-08	5.73793e-07	SGCD
ENSG00000137809	26833.3	10206.9	1.39446	5.95913e-16	3.87513e-14	ITGA11
ENSG00000232320	801.361	305.679	1.39092	0.000301554	0.00194374	AC009299.2
ENSG00000162618	1646.37	628.729	1.38896	2.7258e-06	3.08949e-05	ADGRL4
ENSG00000145934	155.002	59.3802	1.38398	0.000349965	0.00220935	TENM2
ENSG00000139116	154.529	59.3121	1.38225	5.74185e-13	2.38362e-11	KIF21A
ENSG00000116183	2089.99	802.31	1.38122	0.000129761	0.000933632	PAPPA2
ENSG00000260428	68.3856	26.2431	1.37891	1.21572e-07	1.89687e-06	SCX
ENSG00000198838	75.9361	29.2118	1.37663	0.000306534	0.00196967	RYR3
ENSG00000139508	565.405	218.093	1.37478	1.55939e-10	4.27824e-09	SLC46A3
ENSG00000188522	837.058	322.802	1.37421	7.75347e-14	3.63758e-12	FAM83G
ENSG00000119938	3211.15	1239.53	1.37356	4.45373e-16	2.92395e-14	PPP1R3C
ENSG00000151746	688.21	265.896	1.37329	5.424e-18	4.56794e-16	BICD1
ENSG00000101194	478.958	184.987	1.37268	3.78399e-12	1.3736e-10	SLC17A9
ENSG00000152413	284.263	109.75	1.37258	2.09079e-14	1.04789e-12	HOMER1
ENSG00000131015	199.69	77.0808	1.37232	1.58038e-06	1.88481e-05	ULBP2
ENSG00000114850	8015.29	3108.48	1.36661	2.72073e-14	1.34395e-12	SSR3
ENSG00000131018	8430.43	3272.06	1.36549	1.43837e-11	4.69754e-10	SYNE1
ENSG00000137801	296582	115149	1.36493	1.10522e-05	0.000106977	THBS1
ENSG00000100292	7158.42	2780.89	1.36414	0.000247804	0.00163839	HMOX1
ENSG00000061455	101.912	39.7339	1.35852	5.22161e-05	0.000421276	PRDM6
ENSG00000169432	1563.47	611.688	1.35385	0.000472431	0.00285277	SCN9A
ENSG00000155330	240.196	93.7189	1.35367	3.28798e-12	1.20222e-10	C16orf87
ENSG00000158352	252.12	99.0605	1.34991	7.23281e-11	2.11118e-09	SHROOM4
ENSG00000168268	2873.58	1131.98	1.344	4.40562e-09	9.32936e-08	NT5DC2
ENSG00000079308	15640.1	6165.17	1.34306	3.54499e-20	3.79407e-18	TNS1
ENSG00000128590	1416.01	558.507	1.34275	2.48381e-19	2.39624e-17	DNAJB9
ENSG00000136244	607.977	240.57	1.3381	0.000762317	0.00430708	IL6
ENSG00000165757	5880.7	2332.69	1.33404	1.67463e-08	3.14552e-07	JCAD
ENSG00000182054	1074.52	426.333	1.33312	7.24654e-12	2.49429e-10	IDH2
ENSG00000117525	1640.42	651.319	1.33232	0.000588708	0.00344752	F3
ENSG00000125089	125.438	49.7992	1.33068	5.02495e-05	0.000406526	SH3TC1
ENSG00000151012	8359.25	3325.7	1.32967	8.58684e-06	8.63264e-05	SLC7A11
ENSG00000166224	1662.13	661.679	1.32828	1.08452e-22	1.47588e-20	SGPL1
ENSG00000110756	1440.88	574.007	1.32728	1.23e-14	6.39883e-13	HPS5
ENSG00000130508	24563	9802.41	1.32526	1.04395e-16	7.32155e-15	PXDN
ENSG00000156299	633.869	253.337	1.32341	2.96807e-13	1.28945e-11	TIAM1
ENSG00000182580	538.114	215.178	1.32127	2.46784e-15	1.44503e-13	EPHB3
ENSG00000147010	3536.91	1419.12	1.31778	8.79697e-17	6.21199e-15	SH3KBP1
ENSG00000038427	65792.3	26419.2	1.31635	2.63256e-08	4.77884e-07	VCAN
ENSG00000140092	8646.08	3473.41	1.31559	1.50402e-15	9.19822e-14	FBLN5
ENSG00000151014	237.402	95.5424	1.31365	6.44795e-11	1.90372e-09	NOCT
ENSG00000162616	3209.61	1291.57	1.31328	8.0204e-11	2.31802e-09	DNAJB4
ENSG00000100644	13925.8	5626.26	1.30752	1.51148e-15	9.21645e-14	HIF1A
ENSG00000013375	2271.2	918.644	1.30558	7.84023e-32	2.55728e-29	PGM3
ENSG00000143933	13564.7	5493.01	1.30417	9.94809e-14	4.60413e-12	CALM2
ENSG00000124788	2249.6	911.178	1.30408	7.68389e-24	1.12783e-21	ATXN1
ENSG00000140859	1774.78	719.484	1.30238	1.08877e-30	3.10738e-28	KIFC3
ENSG00000026559	378.175	153.214	1.30222	5.71255e-05	0.00045605	KCNG1
ENSG00000082126	40.5103	16.4962	1.29946	0.00204508	0.00992311	MPP4
ENSG00000224687	43.2969	17.6812	1.29784	1.19929e-05	0.000115268	RASAL2-AS1
ENSG00000065911	5155.32	2102.42	1.29385	2.83809e-09	6.25079e-08	MTHFD2
ENSG00000204706	22.9878	9.32889	1.29362	0.00048558	0.00292016	MAMDC2-AS1
ENSG00000134986	2284.64	932.28	1.29293	7.66584e-09	1.54201e-07	NREP
ENSG00000109762	2379.77	973.02	1.29019	4.65874e-21	5.66464e-19	SNX25
ENSG00000211455	1654.12	676.965	1.28935	2.2928e-17	1.75148e-15	STK38L
ENSG00000198805	443.423	181.684	1.28768	8.3781e-10	2.03741e-08	PNP
ENSG00000078269	2014.99	826.048	1.28684	5.22305e-06	5.5267e-05	SYNJ2
ENSG00000156804	2121.87	870.811	1.28508	4.05679e-06	4.38521e-05	FBXO32
ENSG00000059728	492.304	202.147	1.28429	1.65321e-23	2.37565e-21	MXD1
ENSG00000159363	1356.17	557.335	1.28296	2.24238e-12	8.47034e-11	ATP13A2
ENSG00000070495	739.562	304.027	1.28196	4.34246e-23	6.02927e-21	JMJD6
ENSG00000233521	23.7118	9.77606	1.28155	0.00119634	0.00635378	LINC01638
ENSG00000151718	2646.01	1088.63	1.28107	9.35249e-17	6.58165e-15	WWC2
ENSG00000136153	13880.9	5726.31	1.27737	3.3768e-18	2.89124e-16	LMO7
ENSG00000115363	696.655	287.621	1.27709	7.52141e-17	5.36658e-15	EVA1A
ENSG00000142871	23132.1	9555.18	1.27553	1.4983e-09	3.43622e-08	CYR61
ENSG00000148572	1507.79	623.333	1.27434	5.55997e-25	9.06761e-23	NRBF2
ENSG00000157693	699.668	289.191	1.2729	1.94906e-19	1.9072e-17	TMEM268
ENSG00000104415	1278.1	529.817	1.27087	4.40873e-05	0.000363032	WISP1
ENSG00000180739	100.295	41.5686	1.27059	0.00101056	0.00547773	S1PR5
ENSG00000196449	242.358	100.312	1.27018	5.43729e-15	3.0214e-13	YRDC
ENSG00000101255	5053.68	2101.04	1.2661	1.98195e-05	0.000179493	TRIB3
ENSG00000153904	6485.2	2696.5	1.26593	8.22393e-10	2.00467e-08	DDAH1
ENSG00000176014	8248.14	3431.77	1.26509	5.15837e-08	8.77478e-07	TUBB6
ENSG00000099337	1145.45	478.022	1.25991	6.81176e-11	2.0048e-09	KCNK6
ENSG00000099194	89561.2	37408.8	1.25949	2.06972e-06	2.40967e-05	SCD
ENSG00000223652	30.4159	12.7241	1.25737	0.00174392	0.00867696	AC106786.1
ENSG00000155850	1111.58	465.32	1.25707	3.81965e-12	1.38187e-10	SLC26A2
ENSG00000116679	1731.57	724.925	1.25645	2.26479e-11	7.18196e-10	IVNS1ABP
ENSG00000105329	5169.06	2165.54	1.25524	2.1004e-11	6.72293e-10	TGFB1
ENSG00000131236	5772.17	2419.65	1.25431	4.89319e-15	2.73979e-13	CAP1
ENSG00000158079	316.115	132.674	1.25327	1.75773e-17	1.37861e-15	PTPDC1
ENSG00000141682	54.4816	23.0078	1.25296	0.000165421	0.00115975	PMAIP1
ENSG00000136010	8526.29	3579.58	1.25205	4.78584e-14	2.31944e-12	ALDH1L2
ENSG00000164741	6778.49	2845.96	1.25193	1.40127e-12	5.51623e-11	DLC1
ENSG00000108821	935134	393459	1.24896	2.1783e-08	4.00017e-07	COL1A1
ENSG00000134909	776.011	327.006	1.24723	1.42957e-08	2.7075e-07	ARHGAP32
ENSG00000176871	3309.61	1394.91	1.24623	6.30681e-18	5.26824e-16	WSB2
ENSG00000121236	107.11	45.2372	1.24594	0.00175707	0.0087255	TRIM6
ENSG00000198429	154.939	65.6059	1.24047	2.1655e-09	4.85795e-08	ZNF69
ENSG00000075624	117042	49604.2	1.23848	1.83935e-10	5.01283e-09	ACTB
ENSG00000148848	15130.9	6417.96	1.23731	2.52402e-06	2.87346e-05	ADAM12
ENSG00000239672	452.15	192.147	1.23412	8.93608e-11	2.54685e-09	NME1
ENSG00000186594	2037.84	866.42	1.23381	3.35335e-22	4.50378e-20	MIR22HG
ENSG00000152223	3832.65	1631.3	1.23238	1.53113e-05	0.000143471	EPG5
ENSG00000044574	22315.7	9506.89	1.23102	1.56871e-32	5.75631e-30	HSPA5
ENSG00000115902	2852.26	1217.25	1.22825	2.3272e-06	2.67363e-05	SLC1A4
ENSG00000106025	81.1284	34.737	1.22754	7.41161e-07	9.52478e-06	TSPAN12
ENSG00000198517	2380.74	1016.76	1.22725	4.05099e-07	5.5756e-06	MAFK
ENSG00000150687	19477.7	8346.57	1.22255	5.79371e-06	6.07114e-05	PRSS23
ENSG00000282057	129.274	55.4941	1.22207	0.00183151	0.00904706	AC092807.3
ENSG00000116761	439.655	188.202	1.22207	6.55102e-08	1.083e-06	CTH
ENSG00000169857	1019.45	436.824	1.22162	1.17756e-19	1.18037e-17	AVEN
ENSG00000215861	347.925	149.458	1.21936	0.000785275	0.00441736	AC245297.1
ENSG00000023909	3874.39	1664.48	1.21886	4.72669e-09	9.94154e-08	GCLM
ENSG00000178860	2467.38	1060.34	1.21822	3.17285e-11	9.83391e-10	MSC
ENSG00000158186	2245.52	965.49	1.21798	9.71015e-27	1.8977e-24	MRAS
ENSG00000178694	422.876	181.881	1.21687	2.13651e-08	3.93045e-07	NSUN3
ENSG00000173530	2183.37	939.668	1.21645	2.64743e-05	0.000231695	TNFRSF10D
ENSG00000132432	1536.81	661.957	1.21463	9.21181e-13	3.74098e-11	SEC61G
ENSG00000168374	10480.2	4516.31	1.21438	3.34221e-15	1.93462e-13	ARF4
ENSG00000139514	5148.11	2218.76	1.21416	1.4907e-09	3.42644e-08	SLC7A1
ENSG00000167552	8630.55	3720.02	1.21414	8.87572e-09	1.77419e-07	TUBA1A
ENSG00000153885	1410.34	608.835	1.21117	4.53276e-08	7.80751e-07	KCTD15
ENSG00000168209	1806.22	782.479	1.20667	6.74671e-07	8.79684e-06	DDIT4
ENSG00000100345	54806.5	23764.3	1.20555	2.05301e-13	9.13145e-12	MYH9
ENSG00000167394	457.428	198.252	1.20552	2.09187e-20	2.2987e-18	ZNF668
ENSG00000105750	76.3167	33.236	1.20351	0.000304154	0.00195681	ZNF85
ENSG00000146733	902.977	392.052	1.20314	1.15987e-13	5.32014e-12	PSPH
ENSG00000169213	2423.37	1052.73	1.20283	2.51025e-05	0.000221482	RAB3B
ENSG00000221926	518.398	224.982	1.20235	7.50538e-10	1.85817e-08	TRIM16
ENSG00000006453	225.237	98.1518	1.19943	0.000504944	0.00301894	BAIAP2L1
ENSG00000226445	144.206	62.6852	1.19936	0.000673825	0.0038812	BX322234.1
ENSG00000127418	2146.55	934.853	1.19904	1.64299e-13	7.38769e-12	FGFRL1
ENSG00000178607	1046.67	456.388	1.19833	4.758e-17	3.4671e-15	ERN1
ENSG00000227825	153.993	66.9917	1.19705	6.01498e-07	7.94867e-06	SLC9A7P1
ENSG00000108861	2459.68	1075.01	1.19424	1.59206e-45	1.72185e-42	DUSP3
ENSG00000115325	1598.62	699.143	1.19354	4.20806e-06	4.53205e-05	DOK1
ENSG00000068438	1371.27	599.616	1.19313	1.53083e-24	2.4013e-22	FTSJ1
ENSG00000135069	8541.92	3740.4	1.19129	3.43201e-06	3.76934e-05	PSAT1
ENSG00000086062	10089.3	4423.1	1.18971	1.1339e-09	2.67821e-08	B4GALT1
ENSG00000141696	1828.69	802.206	1.18826	9.29359e-21	1.06635e-18	P3H4
ENSG00000135269	1510.56	663.126	1.18793	1.54685e-09	3.54361e-08	TES
ENSG00000115414	1.36841e+06	600669	1.18786	2.77711e-11	8.73918e-10	FN1
ENSG00000143067	431.368	189.676	1.18729	1.63574e-11	5.28504e-10	ZNF697
ENSG00000203668	393.408	172.697	1.18594	3.41511e-13	1.46764e-11	CHML
ENSG00000115828	321.085	141.223	1.18594	2.88656e-08	5.20314e-07	QPCT
ENSG00000142552	6345.86	2799.83	1.18035	1.33116e-16	9.24125e-15	RCN3
ENSG00000186340	54002.7	23847	1.17922	1.66076e-19	1.63527e-17	THBS2
ENSG00000136367	94.4513	41.9009	1.17731	0.00060967	0.00355508	ZFHX2
ENSG00000104635	5341.44	2363.98	1.17621	3.54857e-14	1.72795e-12	SLC39A14
ENSG00000172260	1305.4	577.909	1.17601	4.88125e-08	8.33096e-07	NEGR1
ENSG00000122694	2129.76	943.104	1.17501	7.5745e-15	4.10682e-13	GLIPR2
ENSG00000116299	105.674	46.9025	1.17462	1.0775e-07	1.69865e-06	KIAA1324
ENSG00000274964	34.0767	15.2614	1.17014	0.000203882	0.00138269	AC026356.1
ENSG00000174695	4012.5	1785.37	1.16843	4.78604e-25	7.99579e-23	TMEM167A
ENSG00000166471	1588.71	707.358	1.16736	1.56523e-19	1.55381e-17	TMEM41B
ENSG00000102359	1894.85	843.909	1.16734	6.78866e-07	8.84032e-06	SRPX2
ENSG00000137266	1546.87	689.109	1.16651	2.26431e-07	3.32115e-06	SLC22A23
ENSG00000154277	13258	5913.08	1.16484	1.43971e-10	3.97109e-09	UCHL1
ENSG00000161647	269.001	120.114	1.16375	4.22988e-06	4.55078e-05	MPP3
ENSG00000183010	2960.41	1321.26	1.16364	2.9716e-06	3.3259e-05	PYCR1
ENSG00000112182	85.8886	38.5672	1.15649	0.00110476	0.0059258	BACH2
ENSG00000138448	16608.8	7455.26	1.15566	2.37636e-10	6.39159e-09	ITGAV
ENSG00000081014	1362.3	611.684	1.1549	4.64291e-11	1.40099e-09	AP4E1
ENSG00000091490	4857.74	2184.65	1.15277	1.12716e-06	1.38778e-05	SEL1L3
ENSG00000130758	681.733	306.749	1.15212	1.73974e-28	4.01684e-26	MAP3K10
ENSG00000196352	2670.45	1202.83	1.15066	2.90948e-12	1.07337e-10	CD55
ENSG00000175505	363.84	163.727	1.15059	4.72576e-09	9.94154e-08	CLCF1
ENSG00000182158	4450.2	2005.05	1.15046	8.8398e-12	2.97785e-10	CREB3L2
ENSG00000089639	249.088	112.46	1.15034	2.25525e-07	3.31259e-06	GMIP
ENSG00000169594	565.867	255.22	1.14961	8.93185e-14	4.1525e-12	BNC1
ENSG00000261609	413.47	186.351	1.14771	9.44071e-11	2.66846e-09	GAN
ENSG00000128228	317.816	143.461	1.14767	4.87549e-10	1.25704e-08	SDF2L1
ENSG00000165891	290.068	131.339	1.1452	2.04889e-07	3.02897e-06	E2F7
ENSG00000087053	1515.72	686.528	1.14248	8.14381e-16	5.19711e-14	MTMR2
ENSG00000136026	11591.1	5255.95	1.14101	1.78248e-17	1.39271e-15	CKAP4
ENSG00000120053	1109.38	503.568	1.13857	3.54089e-15	2.03245e-13	GOT1
ENSG00000065060	973.041	442.286	1.13724	8.41331e-07	1.06653e-05	UHRF1BP1
ENSG00000136630	677.301	309.004	1.13179	1.43824e-06	1.7334e-05	HLX
ENSG00000131711	25335	11563.1	1.13159	0.000425132	0.00261157	MAP1B
ENSG00000153214	2012.74	921.546	1.12709	5.32876e-06	5.62697e-05	TMEM87B
ENSG00000005238	1968.41	901.869	1.12658	1.18723e-18	1.07002e-16	FAM214B
ENSG00000166398	1138.94	521.593	1.12645	1.30774e-17	1.05384e-15	KIAA0355
ENSG00000198855	385.699	176.98	1.1252	6.5457e-09	1.33308e-07	FICD
ENSG00000153815	1524.81	700.07	1.12251	6.30727e-14	3.02117e-12	CMIP
ENSG00000223459	254.473	116.998	1.11945	5.77448e-06	6.06026e-05	TCAF1P1
ENSG00000162614	2228.16	1025.68	1.11874	6.28608e-21	7.46663e-19	NEXN
ENSG00000157933	6595.65	3042.99	1.11604	7.51399e-27	1.48466e-24	SKI
ENSG00000186908	1634.95	754.367	1.11544	1.73515e-15	1.0365e-13	ZDHHC17
ENSG00000140511	404.72	186.88	1.11323	8.67477e-05	0.000655842	HAPLN3
ENSG00000138018	876.362	405.483	1.11256	3.63028e-12	1.32119e-10	SELENOI
ENSG00000223559	33.3692	15.4865	1.11017	0.00177223	0.00879225	AC073136.1
ENSG00000131791	1677.32	777.828	1.10827	8.27089e-26	1.49086e-23	PRKAB2
ENSG00000114315	157.609	73.2336	1.10575	0.00177461	0.00879863	HES1
ENSG00000123095	355.688	165.695	1.10408	1.36612e-07	2.11229e-06	BHLHE41
ENSG00000183386	1184.92	551.915	1.102	1.57336e-10	4.31079e-09	FHL3
ENSG00000153823	892.126	415.913	1.10171	4.36361e-06	4.67507e-05	PID1
ENSG00000023902	1203.94	561.302	1.10076	1.20833e-14	6.31805e-13	PLEKHO1
ENSG00000152749	697.858	325.625	1.10021	1.61339e-28	3.76745e-26	GPR180
ENSG00000111711	1816.35	847.112	1.10018	2.77175e-12	1.03183e-10	GOLT1B
ENSG00000177156	6955.14	3244.58	1.09998	3.22087e-07	4.55197e-06	TALDO1
ENSG00000196924	114364	53364.9	1.09966	1.0012e-08	1.965e-07	FLNA
ENSG00000181031	101.256	47.3517	1.09945	0.000507056	0.00302892	RPH3AL
ENSG00000128165	1745.79	815.498	1.09787	0.000201955	0.00137053	ADM2
ENSG00000128567	1589.4	744.397	1.09438	0.000516804	0.00307731	PODXL
ENSG00000222041	1019.01	479.342	1.0879	3.07942e-10	8.17557e-09	CYTOR
ENSG00000261061	123.461	57.9171	1.08666	1.00448e-06	1.25021e-05	AC092718.4
ENSG00000137831	5456.4	2574.54	1.08357	2.43636e-16	1.64687e-14	UACA
ENSG00000175697	26.2137	12.3855	1.08028	0.000777693	0.00438191	GPR156
ENSG00000141526	2201.41	1041.1	1.08024	7.30947e-05	0.000565308	SLC16A3
ENSG00000151729	853.014	404.295	1.07681	8.01924e-12	2.72376e-10	SLC25A4
ENSG00000198856	3449.85	1637.29	1.07533	1.32723e-17	1.06536e-15	OSTC
ENSG00000175727	4123.78	1958.48	1.07448	4.20249e-30	1.13628e-27	MLXIP
ENSG00000100139	2732.1	1298.04	1.07354	2.70701e-08	4.901e-07	MICALL1
ENSG00000198833	2442.94	1161.59	1.0723	9.98973e-15	5.30437e-13	UBE2J1
ENSG00000103121	357.348	169.839	1.07175	7.39927e-07	9.51837e-06	CMC2
ENSG00000165996	316.332	150.482	1.07099	1.68965e-05	0.00015647	HACD1
ENSG00000176915	3368.05	1604.26	1.06993	3.80668e-16	2.52334e-14	ANKLE2
ENSG00000084731	1451.32	691.869	1.06908	1.1765e-08	2.27003e-07	KIF3C
ENSG00000145050	1008.05	481.549	1.06605	3.04388e-11	9.44845e-10	MANF
ENSG00000246859	178.096	85.0978	1.06585	0.000142335	0.00101451	STARD4-AS1
ENSG00000100731	3418.59	1635.76	1.0637	7.58551e-17	5.39358e-15	PCNX1
ENSG00000087008	586.152	280.46	1.06354	1.81271e-12	6.98863e-11	ACOX3
ENSG00000029993	493.766	236.072	1.06313	2.74229e-07	3.94065e-06	HMGB3
ENSG00000164211	2366.04	1132.66	1.06283	3.20895e-12	1.17541e-10	STARD4
ENSG00000197622	1650.99	791.753	1.06057	5.86155e-10	1.48702e-08	CDC42SE1
ENSG00000164930	1283.11	615.294	1.06042	8.49661e-07	1.07526e-05	FZD6
ENSG00000166451	374.652	179.517	1.05989	1.47769e-07	2.26604e-06	CENPN
ENSG00000175166	7865.66	3775.84	1.05884	4.58666e-18	3.89966e-16	PSMD2
ENSG00000170921	1141.4	549.083	1.05626	4.16866e-10	1.08159e-08	TANC2
ENSG00000131473	20317.8	9775.75	1.05546	9.98795e-07	1.24465e-05	ACLY
ENSG00000117143	3138.28	1512.1	1.05326	1.50467e-13	6.81046e-12	UAP1
ENSG00000125354	509.112	245.71	1.05198	0.000790309	0.00444325	2006-09-01
ENSG00000101367	2656.28	1281.14	1.05191	8.36251e-12	2.83099e-10	MAPRE1
ENSG00000058091	1746.4	842.729	1.05148	2.38651e-15	1.40517e-13	CDK14
ENSG00000148335	405.248	195.412	1.05101	2.74496e-08	4.96096e-07	NTMT1
ENSG00000183963	2056.72	993.103	1.05067	9.32215e-09	1.85083e-07	SMTN
ENSG00000244405	1493.75	721.603	1.05002	3.1671e-07	4.48743e-06	ETV5
ENSG00000137168	341.694	165.319	1.0466	7.0393e-09	1.42373e-07	PPIL1
ENSG00000136868	2819.05	1365.98	1.04535	1.08513e-14	5.68836e-13	SLC31A1
ENSG00000261189	65.9448	32.1096	1.04429	0.000567181	0.00334145	AL031058.1
ENSG00000151327	1665.2	807.904	1.04317	9.31828e-19	8.54827e-17	FAM177A1
ENSG00000134013	17507.7	8505.58	1.04148	4.27737e-06	4.59946e-05	LOXL2
ENSG00000115091	6818.91	3313.9	1.04101	9.52625e-26	1.68754e-23	ACTR3
ENSG00000112655	5294.25	2576.6	1.03907	7.69702e-08	1.25429e-06	PTK7
ENSG00000176697	399.843	194.578	1.03802	2.79079e-07	4.00195e-06	BDNF
ENSG00000164066	351.566	171.535	1.03622	0.000329289	0.00210076	INTU
ENSG00000119927	676.991	330.616	1.03501	3.06983e-05	0.000263941	GPAM
ENSG00000177822	172.729	84.5372	1.03323	4.43638e-05	0.000364653	AC098864.1
ENSG00000248927	41.3797	20.1401	1.03167	0.000695653	0.00397967	AC114284.1
ENSG00000168014	675.895	330.556	1.0309	8.92737e-16	5.64457e-14	C2CD3
ENSG00000137522	556.337	272.694	1.02898	1.22747e-15	7.5974e-14	RNF121
ENSG00000100889	3043.11	1492	1.02816	0.000486749	0.00292377	PCK2
ENSG00000271643	105.831	51.8937	1.02443	6.21232e-07	8.14138e-06	AC112220.2
ENSG00000178935	59.7424	29.4352	1.02154	1.36969e-05	0.000130004	ZNF552
ENSG00000092841	14797	7293.75	1.02051	3.58633e-09	7.75741e-08	MYL6
ENSG00000167797	821.357	405.054	1.01948	7.36244e-07	9.48532e-06	CDK2AP2
ENSG00000156384	103.35	51.2188	1.0194	0.000335318	0.00213459	SFR1
ENSG00000101335	15155.7	7476.75	1.01933	2.51909e-05	0.000222166	MYL9
ENSG00000140564	3400.97	1679.3	1.01828	1.02825e-13	4.74821e-12	FURIN
ENSG00000213281	1586.02	783.464	1.0173	8.47366e-16	5.37424e-14	NRAS
ENSG00000198380	5211.48	2575.89	1.01647	1.64941e-23	2.37565e-21	GFPT1
ENSG00000129116	10452.1	5172.03	1.01493	2.85062e-11	8.95677e-10	PALLD
ENSG00000233328	40.6405	20.0489	1.01492	0.000262207	0.00172089	PFN1P1
ENSG00000031081	2104.91	1042.26	1.01426	8.07099e-15	4.36449e-13	ARHGAP31
ENSG00000204147	133.226	65.9793	1.01388	9.25367e-06	9.19061e-05	ASAH2B
ENSG00000254612	169.701	83.9142	1.01329	0.00151504	0.00773672	AP001000.1
ENSG00000100219	3963.84	1965.33	1.01194	1.43156e-08	2.70876e-07	XBP1
ENSG00000173917	826.645	410.514	1.01045	6.48779e-17	4.67781e-15	HOXB2
ENSG00000078804	1320.25	655.96	1.00886	5.92274e-05	0.000471	TP53INP2
ENSG00000073008	1999.14	994.284	1.00746	7.74958e-05	0.000593759	PVR
ENSG00000113578	263.623	131.234	1.00733	2.40159e-05	0.000212478	FGF1
ENSG00000112715	3380.33	1682.4	1.00676	8.70072e-11	2.48666e-09	VEGFA
ENSG00000120868	808.363	402.454	1.00645	3.80721e-17	2.82435e-15	APAF1
ENSG00000196072	1400.28	697.824	1.00551	1.10495e-19	1.11302e-17	BLOC1S2
ENSG00000108829	3372.38	1680.31	1.00488	1.90381e-12	7.3261e-11	LRRC59
ENSG00000109929	2741.36	1368.07	1.00268	1.5257e-06	1.82861e-05	SC5D
ENSG00000172115	1854.83	926.464	1.00131	9.9021e-09	1.9514e-07	CYCS
ENSG00000103381	974.665	487.035	1.00118	4.40308e-06	4.71244e-05	CPPED1
ENSG00000244560	117.492	234.558	-1.00026	0.000213004	0.00143698	AC004890.2
ENSG00000167994	502.158	1005.4	-1.0022	4.15267e-08	7.21328e-07	RAB3IL1
ENSG00000165802	848.538	1700.94	-1.00255	1.75057e-16	1.1951e-14	NSMF
ENSG00000116678	126.815	254.114	-1.00297	9.18163e-07	1.15326e-05	LEPR
ENSG00000143409	128.043	257.224	-1.00666	6.95454e-05	0.000540911	MINDY1
ENSG00000204381	328.949	661.921	-1.00981	0.000312113	0.00199863	LAYN
ENSG00000226742	79.0064	158.675	-1.01004	0.000107614	0.000792797	HSBP1L1
ENSG00000113504	185.028	372.678	-1.01048	0.000363098	0.00227617	SLC12A7
ENSG00000144061	55.5811	111.669	-1.01133	3.20789e-06	3.55962e-05	NPHP1
ENSG00000253716	23.4392	47.3767	-1.01244	0.000196149	0.00133909	MINCR
ENSG00000144724	1023.32	2065.53	-1.01287	8.46883e-07	1.07291e-05	PTPRG
ENSG00000136169	183.028	369.384	-1.01335	1.43816e-06	1.7334e-05	SETDB2
ENSG00000198353	134.851	271.982	-1.01369	5.16489e-07	6.93737e-06	HOXC4
ENSG00000105373	1473.59	2977.51	-1.01465	1.28999e-09	3.00545e-08	NOP53
ENSG00000167723	33.4338	67.789	-1.01656	0.00175924	0.00873413	TRPV3
ENSG00000250903	26.6306	53.6964	-1.01722	1.77777e-05	0.000163452	GMDS-DT
ENSG00000212694	64.5891	130.858	-1.01829	0.00203083	0.00986093	LINC01089
ENSG00000120832	50.6223	102.185	-1.01857	5.38158e-05	0.000431977	MTERF2
ENSG00000196776	886.686	1798.5	-1.02006	3.63265e-12	1.32119e-10	CD47
ENSG00000105486	95.2593	193.846	-1.02106	2.60104e-05	0.000228552	LIG1
ENSG00000160172	25.2798	51.245	-1.02166	4.80839e-05	0.000391007	FAM86C2P
ENSG00000185201	728.1	1478.99	-1.02209	0.0001727	0.00120421	IFITM2
ENSG00000122870	1192.21	2422.38	-1.02247	9.8374e-06	9.69539e-05	BICC1
ENSG00000184640	3196.43	6494.99	-1.02264	5.06533e-25	8.327e-23	2009-09-01
ENSG00000119711	213.088	432.778	-1.023	2.69688e-12	1.01128e-10	ALDH6A1
ENSG00000213853	157.029	319.874	-1.02408	5.15315e-05	0.000416243	EMP2
ENSG00000235703	26.629	53.7181	-1.02517	0.000343341	0.00217601	LINC00894
ENSG00000158296	53.3364	109.014	-1.02742	3.25936e-07	4.60004e-06	SLC13A3
ENSG00000179163	140.385	285.551	-1.02756	3.8452e-05	0.000321199	FUCA1
ENSG00000104936	698.473	1425.64	-1.03043	2.08934e-08	3.85403e-07	DMPK
ENSG00000171425	172.935	353.787	-1.03119	4.57677e-11	1.38714e-09	ZNF581
ENSG00000052126	238.991	489.519	-1.03158	5.88293e-12	2.07e-10	PLEKHA5
ENSG00000162650	73.1113	149.514	-1.03217	1.09898e-11	3.64831e-10	ATXN7L2
ENSG00000161513	278.197	570.045	-1.03426	0.00106949	0.0057622	FDXR
ENSG00000069399	195.227	400.842	-1.03465	9.85254e-09	1.94673e-07	BCL3
ENSG00000133943	217.95	447.092	-1.03602	1.35404e-09	3.13689e-08	DGLUCY
ENSG00000121653	150.94	308.663	-1.03629	3.49067e-11	1.07219e-09	MAPK8IP1
ENSG00000116117	492.89	1010.76	-1.03639	0.00069009	0.00395666	PARD3B
ENSG00000007255	62.3397	127.484	-1.03639	7.46498e-07	9.5754e-06	TRAPPC6A
ENSG00000173209	496.622	1019.08	-1.03705	0.000147343	0.00104876	AHSA2P
ENSG00000116005	3467.24	7119.5	-1.03804	2.22914e-12	8.43582e-11	PCYOX1
ENSG00000106351	94.0657	193.265	-1.03826	6.71907e-08	1.10545e-06	AGFG2
ENSG00000090376	258.368	531.207	-1.03897	7.16252e-11	2.09364e-09	IRAK3
ENSG00000185483	1182.09	2435.02	-1.04271	0.000277483	0.00180786	ROR1
ENSG00000152217	154.138	318.087	-1.04292	9.62464e-06	9.5085e-05	SETBP1
ENSG00000130702	491.258	1013.53	-1.04361	0.000124549	0.000900235	LAMA5
ENSG00000197119	136.728	282.36	-1.04455	2.00887e-05	0.000181452	SLC25A29
ENSG00000082482	1983.29	4095.24	-1.04606	1.58866e-07	2.4146e-06	KCNK2
ENSG00000182179	435.442	900.052	-1.04709	8.35493e-09	1.67335e-07	UBA7
ENSG00000185187	174.025	358.963	-1.04846	1.11047e-09	2.62589e-08	SIGIRR
ENSG00000111961	2476.99	5124.15	-1.04892	3.42921e-24	5.14357e-22	SASH1
ENSG00000175787	17.7994	36.9349	-1.05057	0.00190444	0.00935333	ZNF169
ENSG00000185614	44.0718	91.4814	-1.05147	0.00073434	0.00417195	INKA1
ENSG00000090447	68.0582	141.387	-1.0537	3.00505e-07	4.2823e-06	TFAP4
ENSG00000169239	135.924	281.988	-1.05542	2.44621e-09	5.45196e-08	CA5B
ENSG00000169660	117.135	243.434	-1.05647	3.64704e-08	6.43288e-07	HEXDC
ENSG00000284691	59.4973	124.011	-1.05681	2.41483e-06	2.76447e-05	AC073111.5
ENSG00000127241	583.086	1212.92	-1.05731	7.35694e-06	7.50262e-05	MASP1
ENSG00000181744	187.942	390.944	-1.05787	9.92381e-11	2.79732e-09	C3orf58
ENSG00000110492	184.488	384.238	-1.05859	4.61717e-05	0.000378001	MDK
ENSG00000081377	486.258	1012.13	-1.05921	9.05534e-20	9.25762e-18	CDC14B
ENSG00000173193	377.482	787.797	-1.06011	2.76338e-17	2.09538e-15	PARP14
ENSG00000110042	30.8609	64.1916	-1.06055	0.00155368	0.00789674	DTX4
ENSG00000158062	138.918	289.783	-1.06084	1.61068e-05	0.000150308	UBXN11
ENSG00000220785	200.511	418.876	-1.06229	0.000387042	0.00240864	MTMR9LP
ENSG00000251562	4725.14	9872.23	-1.06305	0.000205805	0.00139436	MALAT1
ENSG00000165475	89.0892	186.016	-1.06345	3.72437e-08	6.53562e-07	CRYL1
ENSG00000265298	37.1868	77.713	-1.06357	0.000340062	0.00215882	AC132812.1
ENSG00000010810	1378.06	2881.31	-1.0642	7.72954e-12	2.63407e-10	FYN
ENSG00000129295	28.1774	59.2609	-1.06645	8.41116e-07	1.06653e-05	LRRC6
ENSG00000165152	164.819	344.814	-1.06651	0.00151104	0.00772015	TMEM246
ENSG00000160932	1668.67	3499.68	-1.06917	1.10171e-17	8.94828e-16	LY6E
ENSG00000152284	269.773	565.654	-1.06941	1.05655e-08	2.05791e-07	TCF7L1
ENSG00000131389	732.349	1537.13	-1.06948	8.72815e-11	2.49104e-09	SLC6A6
ENSG00000260077	48.721	102.053	-1.07055	5.97368e-08	9.97994e-07	AC104794.2
ENSG00000156535	2515.45	5283.61	-1.07066	2.79025e-06	3.15211e-05	CD109
ENSG00000196476	61.8904	130.692	-1.071	3.10891e-05	0.000266967	C20orf96
ENSG00000137700	72.5067	152.256	-1.07247	3.00321e-11	9.33629e-10	SLC37A4
ENSG00000109787	904.091	1903.08	-1.07378	1.53654e-07	2.34563e-06	KLF3
ENSG00000132718	667.313	1406.28	-1.07436	6.06897e-08	1.01227e-06	SYT11
ENSG00000177000	521.673	1098.32	-1.07463	1.15438e-10	3.21427e-09	MTHFR
ENSG00000118242	38.695	81.5018	-1.07491	0.000227344	0.00152222	MREG
ENSG00000121310	295.801	622.554	-1.07511	3.07396e-06	3.42506e-05	ECHDC2
ENSG00000183935	166.572	351.245	-1.07813	9.42372e-05	0.000705714	HTR7P1
ENSG00000170917	22.3267	47.496	-1.08078	5.44216e-05	0.000435988	NUDT6
ENSG00000196839	205.959	436.429	-1.08149	0.000149474	0.00106282	ADA
ENSG00000164107	111.17	234.475	-1.08214	1.04031e-06	1.28934e-05	HAND2
ENSG00000187244	72.9672	154.45	-1.08329	0.000370413	0.00231779	BCAM
ENSG00000242732	275.823	583.809	-1.08337	1.80212e-07	2.71096e-06	RTL5
ENSG00000127955	565.531	1197.93	-1.08355	9.64955e-23	1.32192e-20	GNAI1
ENSG00000198121	1537.92	3264.58	-1.08619	1.95084e-12	7.49304e-11	LPAR1
ENSG00000213347	47.034	100.505	-1.08777	0.000185619	0.0012791	MXD3
ENSG00000214756	37.0529	78.2187	-1.08985	1.53027e-06	1.83249e-05	CSKMT
ENSG00000130787	114.855	243.97	-1.09074	2.22986e-06	2.57568e-05	HIP1R
ENSG00000184381	114.982	245.448	-1.09336	7.09305e-06	7.26595e-05	PLA2G6
ENSG00000167468	2491.67	5315.87	-1.09341	1.20528e-11	3.99473e-10	GPX4
ENSG00000164039	218.083	466.102	-1.0946	0.00088372	0.00487898	BDH2
ENSG00000166780	835.66	1785.58	-1.09539	1.76642e-06	2.08131e-05	C16orf45
ENSG00000105711	41.0055	87.7803	-1.09674	0.00146713	0.00753325	SCN1B
ENSG00000173320	41.582	88.7681	-1.09913	0.00143998	0.00741795	STOX2
ENSG00000235652	30.6429	65.8235	-1.09928	1.26093e-06	1.53228e-05	AL356599.1
ENSG00000131652	128.322	274.617	-1.10019	1.87561e-07	2.80918e-06	THOC6
ENSG00000023839	44.0041	94.1244	-1.10195	0.000851848	0.00472715	ABCC2
ENSG00000283175	21.3883	45.9994	-1.10208	0.000759917	0.00429943	AC007920.2
ENSG00000150977	199.076	427.669	-1.10219	5.94138e-15	3.28198e-13	RILPL2
ENSG00000132185	28.3087	60.6305	-1.10516	0.000346479	0.00219206	FCRLA
ENSG00000128274	389.359	839.513	-1.10775	6.34423e-09	1.2959e-07	A4GALT
ENSG00000197417	16.6225	35.5127	-1.1081	0.000287357	0.00186275	SHPK
ENSG00000104870	736.669	1587.88	-1.10824	9.54834e-09	1.89166e-07	FCGRT
ENSG00000136274	64.8826	140.055	-1.10925	0.000157334	0.00111026	NACAD
ENSG00000130304	501.477	1081.78	-1.10962	1.33098e-13	6.06436e-12	SLC27A1
ENSG00000247271	26.7918	57.8053	-1.1126	0.000555744	0.00328255	ZBED5-AS1
ENSG00000232442	22.359	48.7371	-1.11527	2.6377e-05	0.000231238	MHENCR
ENSG00000272711	9.78918	21.3417	-1.11532	0.00154068	0.00784211	AC019069.1
ENSG00000034152	649.16	1407.57	-1.11671	5.05252e-12	1.79627e-10	MAP2K3
ENSG00000258768	11.9318	25.9741	-1.11704	0.000244332	0.00161648	AL356019.2
ENSG00000138829	1561.99	3391.23	-1.11839	0.00160293	0.008119	FBN2
ENSG00000160447	29.0049	62.9004	-1.11894	0.00025289	0.0016688	PKN3
ENSG00000214425	25.1007	54.9018	-1.1204	9.12478e-06	9.09777e-05	LRRC37A4P
ENSG00000134531	7168.13	15593.7	-1.12131	2.4483e-06	2.79584e-05	EMP1
ENSG00000115896	67.892	148.064	-1.12142	0.000217584	0.00146355	PLCL1
ENSG00000147394	22.7569	49.5531	-1.12223	1.76459e-05	0.000162458	ZNF185
ENSG00000100802	48.5459	105.699	-1.1225	3.90007e-08	6.81484e-07	C14orf93
ENSG00000229847	472.191	1027.13	-1.12252	2.30555e-17	1.75469e-15	EMX2OS
ENSG00000145675	647.744	1411.7	-1.12346	2.37529e-20	2.58253e-18	PIK3R1
ENSG00000235823	40.524	88.1235	-1.12511	6.81162e-05	0.000532367	OLMALINC
ENSG00000173559	682.439	1488.1	-1.1253	1.88869e-07	2.82465e-06	NABP1
ENSG00000157510	96.4843	210.659	-1.12544	0.000457605	0.00277712	AFAP1L1
ENSG00000204642	18.5676	39.9968	-1.12753	0.000109365	0.000803769	HLA-F
ENSG00000132170	98.5217	215.721	-1.12978	0.000283697	0.00184134	PPARG
ENSG00000134352	5474.92	11981.5	-1.12983	2.03296e-08	3.76355e-07	IL6ST
ENSG00000134594	34.733	76.5006	-1.13071	7.1265e-07	9.21022e-06	RAB33A
ENSG00000255495	15.0513	33.11	-1.13122	0.00193085	0.00946042	AC145124.1
ENSG00000026297	108.442	237.681	-1.13624	8.53677e-05	0.00064636	RNASET2
ENSG00000237118	13.1331	28.8993	-1.13891	0.00165225	0.00831957	CYP2F2P
ENSG00000115306	7014.02	15458	-1.14003	1.77136e-11	5.69635e-10	SPTBN1
ENSG00000110318	150.861	333.107	-1.14114	1.73594e-06	2.05247e-05	CEP126
ENSG00000169083	122.186	269.91	-1.14194	2.60707e-09	5.79164e-08	AR
ENSG00000187231	570.996	1260.23	-1.14233	2.48921e-07	3.615e-06	SESTD1
ENSG00000198478	32.9495	73.4559	-1.14637	4.32481e-06	4.63833e-05	SH3BGRL2
ENSG00000145730	3893.2	8634.02	-1.14918	4.40011e-06	4.71172e-05	PAM
ENSG00000180096	24.0706	53.3843	-1.15124	0.00163906	0.00826936	2001-09-01
ENSG00000090006	365.061	811.768	-1.15218	0.000628757	0.00365601	LTBP4
ENSG00000214174	73.635	163.979	-1.15245	6.8869e-07	8.94557e-06	AMZ2P1
ENSG00000139899	95.7857	213.576	-1.15333	1.00748e-05	9.89139e-05	CBLN3
ENSG00000185033	104.045	232.384	-1.15462	1.98083e-06	2.32064e-05	SEMA4B
ENSG00000136048	1598.89	3560.87	-1.15501	3.86179e-07	5.35465e-06	DRAM1
ENSG00000240875	22.7951	50.9712	-1.15593	0.000713588	0.00407094	LINC00886
ENSG00000101224	515.382	1148.97	-1.15596	4.12609e-10	1.07325e-08	CDC25B
ENSG00000100321	202.014	450.172	-1.15608	2.96274e-11	9.23845e-10	SYNGR1
ENSG00000152527	113.316	252.848	-1.15623	1.80607e-05	0.000165388	PLEKHH2
ENSG00000137962	904.492	2015.88	-1.1565	3.35799e-11	1.03453e-09	ARHGAP29
ENSG00000111077	1137.5	2536.44	-1.15709	1.76606e-21	2.25409e-19	TNS2
ENSG00000151062	17.7569	40.0209	-1.15776	0.000884172	0.00488017	CACNA2D4
ENSG00000187994	19.9823	44.6796	-1.15801	0.000164745	0.0011558	RINL
ENSG00000187266	19.163	43.0904	-1.16007	0.000166874	0.00116835	EPOR
ENSG00000144366	123.153	275.196	-1.16051	1.10641e-09	2.61931e-08	GULP1
ENSG00000175611	24.1328	54.6563	-1.16067	0.000176946	0.00123006	LINC00476
ENSG00000116285	461.504	1034.29	-1.16356	9.91415e-09	1.9514e-07	ERRFI1
ENSG00000169814	325.333	729.865	-1.1657	2.21783e-12	8.40852e-11	BTD
ENSG00000197536	33.3371	74.5721	-1.16725	7.92231e-06	8.0274e-05	C5orf56
ENSG00000161955	27.0431	60.6285	-1.1673	7.27852e-06	7.4385e-05	TNFSF13
ENSG00000184602	176.884	397.015	-1.16734	4.09893e-16	2.69964e-14	SNN
ENSG00000164051	140.982	316.7	-1.16914	2.04181e-07	3.02277e-06	CCDC51
ENSG00000251359	11.4807	25.9582	-1.16979	0.000495743	0.00296998	WWC2-AS2
ENSG00000185513	37.1961	83.4825	-1.17037	1.46305e-07	2.24863e-06	L3MBTL1
ENSG00000067606	15.7301	35.3716	-1.17245	0.000301158	0.0019418	PRKCZ
ENSG00000174791	192.136	433.968	-1.17297	6.64946e-09	1.35287e-07	RIN1
ENSG00000144746	2029.19	4578.02	-1.17393	9.78909e-27	1.8977e-24	ARL6IP5
ENSG00000214279	36.5203	82.1114	-1.17401	0.000694492	0.00397414	SCART1
ENSG00000269044	43.4752	98.0155	-1.17541	7.34129e-05	0.000566915	AC024075.2
ENSG00000274180	535.897	1209.96	-1.176	7.22433e-09	1.45685e-07	NATD1
ENSG00000235944	17.179	39.0766	-1.17876	0.00197653	0.00964285	ZNF815P
ENSG00000107821	160.653	363.633	-1.17936	0.000798562	0.00448229	KAZALD1
ENSG00000173535	28.5526	65.2081	-1.18071	0.000550222	0.00325461	TNFRSF10C
ENSG00000173641	282.157	639.394	-1.18153	0.0012912	0.00678418	HSPB7
ENSG00000230074	18.2592	41.3471	-1.18208	0.00162528	0.0082119	AL162231.2
ENSG00000273576	13.2106	30.1989	-1.18365	0.000928671	0.00510247	AC009283.1
ENSG00000103485	544.592	1238.55	-1.18499	2.09209e-05	0.000188142	QPRT
ENSG00000214021	322.728	733.56	-1.185	8.02969e-06	8.12819e-05	TTLL3
ENSG00000049759	53.606	122.202	-1.18578	1.18903e-06	1.45697e-05	NEDD4L
ENSG00000253661	24.1837	54.8747	-1.1889	9.3612e-05	0.000701544	ZFHX4-AS1
ENSG00000105792	21.9273	49.9648	-1.18997	0.00068718	0.00394658	CFAP69
ENSG00000143443	44.6859	102.359	-1.19024	2.10766e-11	6.73566e-10	C1orf56
ENSG00000273329	13.428	30.4816	-1.19197	6.05988e-05	0.000480901	AC078846.1
ENSG00000104883	28.9404	66.0056	-1.19239	0.000235298	0.00156832	PEX11G
ENSG00000171444	203.028	465.086	-1.19273	1.16317e-07	1.82041e-06	MCC
ENSG00000116191	697.068	1597.97	-1.19688	8.44318e-11	2.42317e-09	RALGPS2
ENSG00000159231	99.6096	229.189	-1.19888	2.58983e-06	2.94187e-05	CBR3
ENSG00000164342	58.6373	135.424	-1.20069	5.34432e-07	7.11733e-06	TLR3
ENSG00000102287	262.156	602.336	-1.20075	4.76301e-05	0.000387778	GABRE
ENSG00000169122	236.635	543.931	-1.20122	3.08505e-08	5.527e-07	FAM110B
ENSG00000141854	10.0313	23.1453	-1.20213	0.00191432	0.0093929	MISP3
ENSG00000160460	49.912	114.56	-1.20271	4.01927e-10	1.04679e-08	SPTBN4
ENSG00000115255	20.585	47.048	-1.20458	0.000675273	0.00388798	REEP6
ENSG00000163040	196.179	452.406	-1.20528	2.70275e-06	3.06505e-05	CCDC74A
ENSG00000135047	3127.02	7215.37	-1.20626	4.53906e-07	6.18113e-06	CTSL
ENSG00000025039	80.4668	185.478	-1.20684	0.00151614	0.00774041	RRAGD
ENSG00000130340	2801.96	6472.55	-1.20775	6.80638e-13	2.80852e-11	SNX9
ENSG00000112964	88.9593	205.811	-1.20903	5.7088e-06	6.0012e-05	GHR
ENSG00000253540	26.7742	61.7448	-1.20935	3.00772e-05	0.000259144	FAM86HP
ENSG00000279696	9.74237	22.3204	-1.21216	0.000947394	0.00518732	AP001273.1
ENSG00000110446	94.1574	218.515	-1.21227	1.27458e-11	4.20406e-10	SLC15A3
ENSG00000179094	97.6851	226.673	-1.2123	3.78104e-05	0.000316792	PER1
ENSG00000143801	90.6434	210.885	-1.22009	0.00175204	0.00870471	PSEN2
ENSG00000188613	32.4638	75.2806	-1.22216	6.24709e-05	0.000493927	NANOS1
ENSG00000228526	130.139	304.021	-1.22353	0.000307902	0.00197659	MIR34AHG
ENSG00000152465	448.629	1048.17	-1.2246	1.41168e-08	2.68101e-07	NMT2
ENSG00000215883	84.9346	198.325	-1.22514	3.76824e-09	8.09128e-08	CYB5RL
ENSG00000122420	405.224	949.021	-1.22716	7.69835e-06	7.81974e-05	PTGFR
ENSG00000099840	29.0402	67.7232	-1.2275	0.000391791	0.00243303	IZUMO4
ENSG00000151117	17.5198	41.229	-1.22865	0.000199985	0.00136076	TMEM86A
ENSG00000075826	83.7481	196.208	-1.22871	0.000657002	0.00379447	SEC31B
ENSG00000006740	68.4344	160.652	-1.23029	1.91688e-05	0.00017421	ARHGAP44
ENSG00000271614	33.0287	77.3534	-1.23277	1.67163e-05	0.00015522	ATP2B1-AS1
ENSG00000239697	144.587	338.946	-1.23325	3.87621e-08	6.77892e-07	TNFSF12
ENSG00000247934	15.234	35.8382	-1.23618	0.000487967	0.00292937	AC022364.1
ENSG00000204052	16.4873	38.8729	-1.23642	0.00011367	0.000832133	LRRC73
ENSG00000182796	155.398	366.412	-1.23685	3.51394e-08	6.23019e-07	TMEM198B
ENSG00000167705	72.4715	170.581	-1.23706	1.15358e-07	1.80678e-06	RILP
ENSG00000119862	71.3421	167.95	-1.23732	4.76489e-06	5.06875e-05	LGALSL
ENSG00000260804	79.0162	186.402	-1.23746	1.81368e-09	4.11815e-08	LINC01963
ENSG00000110799	58.3957	138.111	-1.23762	0.000305544	0.00196452	VWF
ENSG00000099889	52.7391	123.827	-1.23783	0.000348503	0.0022035	ARVCF
ENSG00000284237	12.7878	30.0326	-1.23946	0.000331221	0.00211123	AL356275.1
ENSG00000204410	11.2412	26.8016	-1.24114	0.000471193	0.00284697	MSH5
ENSG00000240184	672.587	1593.07	-1.24393	7.40014e-07	9.51837e-06	PCDHGC3
ENSG00000235863	59.3064	140.485	-1.24449	4.171e-05	0.000346163	B3GALT4
ENSG00000133315	61.6685	145.989	-1.24647	4.33873e-08	7.51108e-07	MACROD1
ENSG00000255874	124.207	294.271	-1.24797	3.481e-09	7.54227e-08	LINC00346
ENSG00000263874	10.4767	24.6064	-1.24899	0.00129662	0.00680396	LINC00672
ENSG00000214140	34.005	80.8151	-1.24923	1.92256e-06	2.25624e-05	PRCD
ENSG00000182326	8731.92	20764.3	-1.24972	3.73936e-07	5.1919e-06	C1S
ENSG00000139835	30.3783	72.9367	-1.25008	9.04349e-06	9.02111e-05	GRTP1
ENSG00000100350	254.201	604.133	-1.25041	4.58093e-09	9.67457e-08	FOXRED2
ENSG00000184363	30.9169	72.9597	-1.2505	6.64594e-07	8.67095e-06	PKP3
ENSG00000105974	4731.49	11269.4	-1.252	4.69506e-13	1.97298e-11	CAV1
ENSG00000171150	742.65	1772.04	-1.25444	1.28486e-14	6.65053e-13	SOCS5
ENSG00000115380	15406.5	36956.9	-1.26231	0.000379457	0.00236717	EFEMP1
ENSG00000234719	12.0763	28.9667	-1.2624	0.000482853	0.00290801	NPIPB2
ENSG00000134138	396.332	951.05	-1.2626	2.15194e-06	2.49831e-05	MEIS2
ENSG00000108771	112.236	268.394	-1.2628	3.99559e-07	5.51784e-06	DHX58
ENSG00000116962	2471.99	5936.09	-1.26386	4.30907e-11	1.30793e-09	NID1
ENSG00000138771	303.539	729.931	-1.26624	0.000306536	0.00196967	SHROOM3
ENSG00000179240	9.95187	24.0052	-1.26729	0.000511526	0.00305207	GVQW3
ENSG00000138185	55.2772	133.646	-1.26898	0.000227771	0.00152359	ENTPD1
ENSG00000180875	726.561	1752.65	-1.27037	1.19206e-06	1.45965e-05	GREM2
ENSG00000099998	61.1815	147.976	-1.27117	0.000467444	0.00282764	GGT5
ENSG00000166592	16.7478	40.6774	-1.27138	0.000433781	0.00265765	RRAD
ENSG00000188060	32.951	80.2681	-1.27295	5.41718e-05	0.000434156	RAB42
ENSG00000170801	1216.6	2941.03	-1.27332	0.000211425	0.00142773	HTRA3
ENSG00000204991	45.3564	110.232	-1.27341	5.09654e-08	8.67679e-07	SPIRE2
ENSG00000180769	71.0715	172.362	-1.27462	2.97142e-06	3.3259e-05	WDFY3-AS2
ENSG00000147862	351.302	849.59	-1.27508	2.48398e-18	2.15373e-16	NFIB
ENSG00000099377	236.146	572.987	-1.27845	8.10656e-12	2.74887e-10	HSD3B7
ENSG00000133687	570.462	1384.46	-1.27862	2.21155e-08	4.05759e-07	TMTC1
ENSG00000104361	576.794	1400.67	-1.27994	2.22686e-36	1.17333e-33	NIPAL2
ENSG00000156521	154.228	374.484	-1.28	1.00326e-14	5.31337e-13	TYSND1
ENSG00000040731	28.4143	69.2279	-1.28017	0.000282328	0.00183371	CDH10
ENSG00000275367	7.57643	18.4964	-1.28311	0.00199059	0.00969303	AC092111.1
ENSG00000000971	475.377	1157.42	-1.28371	0.000231822	0.00154666	CFH
ENSG00000179104	121.349	296.855	-1.28715	2.86704e-10	7.67119e-09	TMTC2
ENSG00000107798	2179.25	5324.4	-1.28896	3.2716e-09	7.13674e-08	LIPA
ENSG00000148700	2861.07	7001.12	-1.29095	4.60393e-10	1.19001e-08	ADD3
ENSG00000143772	98.2067	240.495	-1.29128	8.07057e-07	1.02816e-05	ITPKB
ENSG00000088756	207.452	508.425	-1.29375	0.0016644	0.0083746	ARHGAP28
ENSG00000116574	53.8189	131.695	-1.29762	1.00157e-06	1.24735e-05	RHOU
ENSG00000183765	60.3924	149.021	-1.29842	4.00082e-07	5.52135e-06	CHEK2
ENSG00000152076	55.5567	136.51	-1.29983	0.000743734	0.00421833	CCDC74B
ENSG00000130005	209.319	517.282	-1.30202	4.66909e-20	4.92195e-18	GAMT
ENSG00000103056	14.5763	35.676	-1.30544	2.87402e-05	0.000249086	SMPD3
ENSG00000177076	19.0087	46.9374	-1.30585	0.000228778	0.00152983	ACER2
ENSG00000160789	9072.96	22431.6	-1.30598	6.86692e-27	1.36998e-24	LMNA
ENSG00000237807	22.913	57.5085	-1.30861	2.35404e-05	0.000209046	AC022034.1
ENSG00000152518	1655.18	4106.33	-1.31106	2.35178e-06	2.69831e-05	ZFP36L2
ENSG00000159433	77.8658	193.188	-1.31196	0.000764401	0.00431648	STARD9
ENSG00000188921	77.0887	192.32	-1.31221	1.02411e-05	0.000100116	HACD4
ENSG00000071967	8845.97	21984.7	-1.31348	9.28361e-10	2.23122e-08	CYBRD1
ENSG00000206384	14.3805	35.98	-1.31358	0.000250601	0.00165582	COL6A6
ENSG00000135424	266.995	664.327	-1.31372	2.88885e-05	0.0002502	ITGA7
ENSG00000185100	17.8072	43.9908	-1.31514	0.000273768	0.00178422	ADSSL1
ENSG00000247809	12.7811	31.8924	-1.31526	0.000136122	0.000973701	NR2F2-AS1
ENSG00000147251	1032.18	2570.78	-1.31671	4.92027e-09	1.0296e-07	DOCK11
ENSG00000165895	42.5725	106.593	-1.32048	2.22148e-05	0.000198474	ARHGAP42
ENSG00000197558	14.7258	37.2767	-1.32225	0.0011544	0.00615193	SSPO
ENSG00000007944	98.0462	245.249	-1.32237	5.35759e-05	0.000430556	MYLIP
ENSG00000140459	28.4306	71.1952	-1.32352	0.000142821	0.00101762	CYP11A1
ENSG00000172594	281.056	705.925	-1.33013	1.09421e-12	4.38304e-11	SMPDL3A
ENSG00000076555	79.238	199.39	-1.33152	5.71237e-06	6.0012e-05	ACACB
ENSG00000205090	32.6988	81.8777	-1.33294	0.00042387	0.00260618	TMEM240
ENSG00000170549	85.9231	215.789	-1.33306	4.28175e-07	5.86181e-06	IRX1
ENSG00000143819	1000.26	2520	-1.33374	4.2844e-12	1.54186e-10	EPHX1
ENSG00000111801	205.776	519.195	-1.33397	3.34992e-06	3.69102e-05	BTN3A3
ENSG00000170425	36.6198	91.7744	-1.33401	5.23051e-07	6.99296e-06	ADORA2B
ENSG00000100342	460.739	1162.07	-1.33428	1.65284e-06	1.96665e-05	APOL1
ENSG00000162599	242.716	612.392	-1.33521	2.03121e-06	2.37284e-05	NFIA
ENSG00000198743	922.513	2329.72	-1.33621	7.03245e-10	1.75803e-08	SLC5A3
ENSG00000105519	61.9625	156.94	-1.33777	1.54562e-07	2.35616e-06	CAPS
ENSG00000255389	10.8979	27.7011	-1.34429	0.00027214	0.00177579	Z97989.1
ENSG00000124104	684.321	1738.12	-1.34488	7.65912e-16	4.91835e-14	SNX21
ENSG00000148798	11.8412	30.3727	-1.3452	0.00144675	0.00744535	INA
ENSG00000259583	36.8697	93.8893	-1.34674	4.55107e-07	6.18927e-06	AC015712.2
ENSG00000251669	31.7518	80.121	-1.34676	2.212e-09	4.95685e-08	FAM86EP
ENSG00000174804	421.394	1072.8	-1.34703	2.29183e-13	1.01062e-11	FZD4
ENSG00000226314	10.4428	26.5351	-1.34727	0.00012539	0.000905355	ZNF192P1
ENSG00000133805	91.7635	234.302	-1.35041	0.000194912	0.00133242	AMPD3
ENSG00000171791	66.3848	169.268	-1.35072	0.000961222	0.00525606	BCL2
ENSG00000166825	3290.83	8394.3	-1.35083	4.64563e-05	0.000379877	ANPEP
ENSG00000204264	166.657	426.79	-1.35279	6.98244e-13	2.8754e-11	PSMB8
ENSG00000146411	55.1065	140.7	-1.35376	7.7385e-08	1.26005e-06	SLC2A12
ENSG00000110455	204.017	521.978	-1.35584	3.71215e-06	4.04245e-05	ACCS
ENSG00000116729	366.49	938.937	-1.35655	5.29769e-05	0.000426409	WLS
ENSG00000279453	43.5883	111.574	-1.35762	1.93914e-08	3.60285e-07	Z99129.4
ENSG00000125945	281.859	724.674	-1.36107	1.22605e-09	2.87934e-08	ZNF436
ENSG00000120658	245.668	630.444	-1.36166	8.67539e-29	2.07291e-26	ENOX1
ENSG00000101955	859.051	2208.28	-1.36197	0.0019763	0.00964285	SRPX
ENSG00000102003	7.39984	18.8417	-1.36392	0.00172015	0.00858781	SYP
ENSG00000118503	122.189	315.023	-1.36482	0.000159468	0.00112377	TNFAIP3
ENSG00000101347	254.197	655.911	-1.36679	1.80867e-08	3.37569e-07	SAMHD1
ENSG00000158555	298.721	770.324	-1.36762	4.93383e-07	6.64385e-06	GDPD5
ENSG00000174628	49.3644	127.224	-1.3681	3.27285e-08	5.82789e-07	IQCK
ENSG00000006534	277.396	716.382	-1.36902	3.20107e-12	1.17462e-10	ALDH3B1
ENSG00000258461	9.652	25.0468	-1.36946	0.00205248	0.00995226	AC012651.1
ENSG00000143867	187.533	486.404	-1.37638	9.3437e-08	1.49536e-06	OSR1
ENSG00000196502	34.9255	90.4575	-1.37666	4.60781e-06	4.91619e-05	SULT1A1
ENSG00000152953	252.579	656.218	-1.37759	0.000559176	0.00329808	STK32B
ENSG00000104368	684.453	1781.84	-1.3798	0.00021593	0.00145385	PLAT
ENSG00000072954	16.3812	42.4722	-1.3822	4.47677e-05	0.000367385	TMEM38A
ENSG00000163297	2027.25	5287.23	-1.38272	1.61083e-12	6.2337e-11	ANTXR2
ENSG00000104518	206.114	537.174	-1.38279	3.64182e-07	5.06674e-06	GSDMD
ENSG00000123080	171.74	448.812	-1.38427	6.24085e-11	1.84523e-09	CDKN2C
ENSG00000263345	9.0384	23.5909	-1.38804	0.00171626	0.00857461	AC006435.2
ENSG00000164542	10.4878	27.0043	-1.39016	0.000290467	0.00187935	KIAA0895
ENSG00000078053	56.1973	148.438	-1.39486	0.000238896	0.00158613	AMPH
ENSG00000149131	2215.31	5847.05	-1.40017	0.00104631	0.00565654	SERPING1
ENSG00000278934	7.83169	21.0975	-1.40167	0.000441111	0.00269373	AC117489.1
ENSG00000030419	26.9488	70.9043	-1.40209	2.64563e-07	3.82046e-06	IKZF2
ENSG00000116883	22.7873	59.7714	-1.40266	1.02608e-07	1.62441e-06	AL591845.1
ENSG00000139263	203.358	538.603	-1.40346	5.84032e-05	0.000465165	LRIG3
ENSG00000273226	7.13489	18.9724	-1.40428	0.00167236	0.00840551	AL391834.2
ENSG00000110002	85.5911	227.648	-1.40914	5.59786e-11	1.67195e-09	VWA5A
ENSG00000177406	45.5789	121.37	-1.40993	1.28908e-05	0.000123263	AC021054.1
ENSG00000126709	162.358	431.074	-1.40998	1.49032e-11	4.84568e-10	IFI6
ENSG00000139178	297.181	791.228	-1.41136	1.97705e-08	3.66996e-07	C1RL
ENSG00000162572	56.8237	151.249	-1.41341	7.57463e-08	1.23631e-06	SCNN1D
ENSG00000125864	15.9719	42.9955	-1.41406	0.000102879	0.000763199	BFSP1
ENSG00000147813	61.3771	163.585	-1.41575	5.40501e-08	9.13385e-07	NAPRT
ENSG00000154102	21.5119	57.0078	-1.41695	0.000140182	0.0010009	C16orf74
ENSG00000186301	30.1521	80.9589	-1.41968	0.00189697	0.00932654	MST1P2
ENSG00000175048	87.1606	232.878	-1.42029	6.27728e-10	1.58467e-08	ZDHHC14
ENSG00000079435	39.3852	105.509	-1.421	1.03263e-06	1.28137e-05	LIPE
ENSG00000188042	484.941	1299.44	-1.42122	1.11741e-05	0.000108055	ARL4C
ENSG00000169744	149.929	403.034	-1.42363	1.43556e-08	2.71133e-07	LDB2
ENSG00000189320	284.65	765.24	-1.42421	8.09563e-15	4.36633e-13	FAM180A
ENSG00000277476	17.2943	46.51	-1.42479	7.05732e-07	9.13229e-06	AC005332.5
ENSG00000155792	874.723	2349.54	-1.42576	1.06462e-07	1.68154e-06	DEPTOR
ENSG00000185909	249.128	669.334	-1.4258	6.86566e-11	2.01546e-09	KLHDC8B
ENSG00000175643	17.0864	46.1772	-1.42663	4.39936e-05	0.00036248	RMI2
ENSG00000144857	358.961	966.49	-1.42833	2.36426e-11	7.48584e-10	BOC
ENSG00000196407	12.0914	32.3835	-1.42851	1.55831e-06	1.86281e-05	THEM5
ENSG00000235257	13.8772	37.4076	-1.42987	1.13169e-05	0.000109333	ITGA9-AS1
ENSG00000036530	6.14532	16.6776	-1.4303	0.00134387	0.00701235	CYP46A1
ENSG00000197457	49.8699	134.904	-1.43057	0.0017795	0.00881983	STMN3
ENSG00000186815	877.383	2367.54	-1.43225	5.47899e-13	2.28373e-11	TPCN1
ENSG00000162461	12.0317	32.2379	-1.43226	0.000263958	0.00173127	SLC25A34
ENSG00000091409	184.201	496.865	-1.43233	0.00111227	0.00596295	ITGA6
ENSG00000138821	261.869	707.722	-1.43388	8.07847e-07	1.02853e-05	SLC39A8
ENSG00000072210	294.88	796.716	-1.43464	2.58282e-41	2.12297e-38	ALDH3A2
ENSG00000107551	63.1422	171.094	-1.43823	4.57257e-07	6.2103e-06	RASSF4
ENSG00000138678	9.29711	25.5489	-1.43839	0.000993547	0.00540239	GPAT3
ENSG00000163590	45.6943	123.809	-1.43918	1.76164e-09	4.0133e-08	PPM1L
ENSG00000196189	13.5355	36.4322	-1.44312	0.000835118	0.00464686	SEMA4A
ENSG00000132122	41.9125	114.236	-1.44338	1.50213e-12	5.89069e-11	SPATA6
ENSG00000110852	78.3104	212.531	-1.44452	1.24005e-05	0.000119018	CLEC2B
ENSG00000105514	45.794	125.388	-1.44609	3.27893e-08	5.83365e-07	RAB3D
ENSG00000145687	132.281	360.424	-1.44627	4.92989e-13	2.06743e-11	SSBP2
ENSG00000176438	954.787	2602.77	-1.44684	1.31254e-08	2.50198e-07	SYNE3
ENSG00000283828	11.4094	31.373	-1.44704	6.74903e-05	0.000528327	AL137002.2
ENSG00000170629	15.6213	42.9386	-1.44813	0.000116534	0.00084887	DPY19L2P2
ENSG00000172345	29.8999	81.4493	-1.45008	1.38118e-05	0.000130973	STARD5
ENSG00000137463	34.2467	93.1831	-1.45058	7.68997e-05	0.000589672	MGARP
ENSG00000213930	70.5513	192.357	-1.45395	1.26222e-10	3.50033e-09	GALT
ENSG00000139354	38.841	107.44	-1.45473	4.10753e-06	4.4347e-05	GAS2L3
ENSG00000241769	11.5233	31.7385	-1.45559	0.000107218	0.000790252	LINC00893
ENSG00000164070	168.325	462.385	-1.45608	4.68582e-07	6.34315e-06	HSPA4L
ENSG00000172819	457.194	1256.13	-1.45809	2.81049e-13	1.22878e-11	RARG
ENSG00000072952	269.524	740.63	-1.45819	1.10933e-12	4.43493e-11	MRVI1
ENSG00000119986	195.794	537.872	-1.45923	2.91027e-11	9.10245e-10	AVPI1
ENSG00000166896	18.2017	50.6566	-1.4593	0.000294524	0.0019026	ATP23
ENSG00000116667	323.125	889.621	-1.45962	3.22629e-14	1.5785e-12	C1orf21
ENSG00000133466	117.477	323.592	-1.46042	6.79675e-05	0.000531455	C1QTNF6
ENSG00000156140	10.3006	28.1107	-1.46042	0.000130875	0.000940987	ADAMTS3
ENSG00000130988	14.7419	40.9124	-1.46106	0.00185949	0.00916984	RGN
ENSG00000138735	193.697	533.921	-1.46191	1.52222e-10	4.18742e-09	PDE5A
ENSG00000244617	8.11314	22.6856	-1.46415	8.32944e-05	0.000632293	ASPRV1
ENSG00000178038	29.0332	80.5622	-1.46548	6.06362e-05	0.000480901	ALS2CL
ENSG00000151789	25.983	72.2607	-1.46638	1.72236e-06	2.04111e-05	ZNF385D
ENSG00000197747	3279.32	9065.71	-1.467	5.54309e-10	1.41497e-08	S100A10
ENSG00000204314	19.1582	52.954	-1.46743	0.000183694	0.00126754	PRRT1
ENSG00000237125	97.0549	268.785	-1.46844	2.3081e-14	1.14841e-12	HAND2-AS1
ENSG00000185664	6.33402	17.3877	-1.471	0.00101846	0.00551619	PMEL
ENSG00000102935	116.537	323.568	-1.47108	0.00201566	0.00979672	ZNF423
ENSG00000182916	48.4334	135.185	-1.47125	4.20647e-05	0.000348684	TCEAL7
ENSG00000174348	1445.19	4020.92	-1.47623	1.34236e-05	0.000127704	PODN
ENSG00000159588	11.3365	30.9639	-1.4769	0.000693444	0.00397035	CCDC17
ENSG00000145779	145.129	404.194	-1.47839	3.14736e-08	5.63373e-07	TNFAIP8
ENSG00000137628	74.7745	208.967	-1.47922	2.89248e-12	1.06902e-10	DDX60
ENSG00000254602	13.644	37.3312	-1.48085	0.000524812	0.00312018	AP000662.1
ENSG00000130270	14.1515	40.0596	-1.48102	0.000160088	0.00112697	ATP8B3
ENSG00000182621	136.109	380.622	-1.48184	8.73145e-06	8.75659e-05	PLCB1
ENSG00000088340	14.6253	40.944	-1.48198	0.00176715	0.00876919	FER1L4
ENSG00000049130	861.033	2411.17	-1.48546	2.76857e-16	1.8592e-14	KITLG
ENSG00000134853	2490.79	6976.97	-1.48581	6.2244e-08	1.03567e-06	PDGFRA
ENSG00000186496	13.9443	39.0303	-1.48609	5.62571e-05	0.000449467	ZNF396
ENSG00000180447	895.812	2510.74	-1.48696	6.01031e-11	1.78219e-09	GAS1
ENSG00000231389	22.1398	61.9886	-1.48772	0.00141181	0.00728858	HLA-DPA1
ENSG00000184371	1760.72	4940.25	-1.48813	2.04234e-12	7.82984e-11	CSF1
ENSG00000009413	638.553	1796.41	-1.49201	1.83991e-27	3.93837e-25	REV3L
ENSG00000172731	84.6765	238.371	-1.49533	8.60955e-26	1.53841e-23	LRRC20
ENSG00000109610	1607.51	4531.61	-1.49545	9.43295e-08	1.50846e-06	SOD3
ENSG00000166974	286.717	810.126	-1.49739	4.67069e-20	4.92195e-18	MAPRE2
ENSG00000141480	38.1765	108.508	-1.49875	1.26265e-08	2.42036e-07	ARRB2
ENSG00000080573	670.582	1895.28	-1.4988	3.57528e-10	9.38294e-09	COL5A3
ENSG00000188185	31.2881	89.2517	-1.50264	6.25224e-09	1.27838e-07	LINC00265
ENSG00000043143	447.538	1268.92	-1.50279	3.39358e-24	5.14357e-22	JADE2
ENSG00000135740	57.2275	162.502	-1.50353	2.93381e-06	3.29077e-05	SLC9A5
ENSG00000178685	373.651	1059.64	-1.50381	9.96296e-12	3.32352e-10	PARP10
ENSG00000115257	20.1618	56.9385	-1.50508	2.13663e-07	3.15413e-06	PCSK4
ENSG00000204851	49.6396	141.363	-1.50656	1.58031e-05	0.000147675	PNMA8B
ENSG00000121039	2151.71	6116.52	-1.50724	6.91255e-05	0.000538202	RDH10
ENSG00000184785	53.0388	151.725	-1.50736	7.55143e-11	2.19794e-09	SMIM10
ENSG00000101384	806.166	2295.46	-1.50954	0.000105367	0.000778847	JAG1
ENSG00000154358	45.9017	130.423	-1.50986	7.44946e-07	9.56743e-06	OBSCN
ENSG00000089060	544.248	1549.47	-1.51009	8.55354e-12	2.88615e-10	SLC8B1
ENSG00000181513	70.1675	200.641	-1.51063	1.68456e-11	5.43423e-10	ACBD4
ENSG00000198835	61.2991	174.819	-1.51456	0.00169357	0.00848815	GJC2
ENSG00000179044	10.661	30.3897	-1.51774	0.000357138	0.00224356	EXOC3L1
ENSG00000130518	57.894	165.283	-1.51896	8.45575e-11	2.42339e-09	IQCN
ENSG00000186918	114.653	327.732	-1.52091	1.76347e-14	8.94753e-13	ZNF395
ENSG00000056972	123.487	355.586	-1.5223	1.44584e-06	1.74153e-05	TRAF3IP2
ENSG00000162631	43.4073	125.002	-1.52542	6.64188e-05	0.000521728	NTNG1
ENSG00000081059	76.0364	219.676	-1.52605	1.41934e-08	2.69308e-07	TCF7
ENSG00000198932	50.7165	146.223	-1.52721	1.45944e-05	0.00013738	GPRASP1
ENSG00000184368	12.4195	36.1241	-1.5285	0.00161447	0.00816534	MAP7D2
ENSG00000138669	17.3895	50.8332	-1.53112	0.000195033	0.0013328	PRKG2
ENSG00000135205	22.3362	64.7463	-1.53333	1.33171e-06	1.61351e-05	CCDC146
ENSG00000181104	2475.22	7165.34	-1.53334	2.03503e-08	3.76398e-07	F2R
ENSG00000090776	306.812	887.994	-1.53428	1.11071e-15	6.9374e-14	EFNB1
ENSG00000176890	61.1919	178.098	-1.53545	1.02259e-05	0.000100057	TYMS
ENSG00000102802	1506.29	4378.67	-1.5394	4.05662e-15	2.31554e-13	MEDAG
ENSG00000139625	364.942	1061.5	-1.53944	3.55167e-08	6.28624e-07	MAP3K12
ENSG00000119943	154.532	449.084	-1.54177	6.66667e-17	4.78998e-15	PYROXD2
ENSG00000164442	2136.86	6221.76	-1.54197	2.9725e-07	4.2418e-06	CITED2
ENSG00000168765	147.154	427.251	-1.54237	1.67343e-14	8.51171e-13	GSTM4
ENSG00000159761	30.0602	88.0122	-1.54385	2.88932e-05	0.0002502	C16orf86
ENSG00000233608	866.09	2526.97	-1.54457	1.02655e-14	5.42278e-13	TWIST2
ENSG00000167779	3286.07	9592.78	-1.54566	9.37467e-15	5.01667e-13	IGFBP6
ENSG00000239415	9.34267	27.0785	-1.54726	0.0010887	0.00584813	AP001469.3
ENSG00000233223	31.2272	92.1144	-1.55296	2.77831e-06	3.14207e-05	AC016876.1
ENSG00000170153	134.524	395.122	-1.55476	1.63173e-05	0.000152065	RNF150
ENSG00000145349	823.905	2425.71	-1.558	1.55602e-16	1.07659e-14	CAMK2D
ENSG00000279108	10.4724	30.7284	-1.55959	1.06998e-05	0.000104056	AC008537.3
ENSG00000025434	49.7165	147.777	-1.56405	9.80859e-06	9.67163e-05	NR1H3
ENSG00000196338	16.8849	49.6322	-1.56539	0.00131753	0.00690135	NLGN3
ENSG00000163947	102.657	305.34	-1.56918	8.19556e-05	0.000623512	ARHGEF3
ENSG00000259275	6.46639	19.1368	-1.57017	0.00036194	0.00227005	AC087477.2
ENSG00000267280	8.76515	25.7181	-1.57071	0.000515652	0.00307313	TBX2-AS1
ENSG00000135929	68.3432	203.82	-1.57213	3.00548e-09	6.57718e-08	CYP27A1
ENSG00000109072	33.151	98.5718	-1.57284	0.000152233	0.00107833	VTN
ENSG00000126218	128.152	381.409	-1.5743	4.99637e-05	0.000404533	F10
ENSG00000125848	28.1701	83.9512	-1.57487	0.000121534	0.000881225	FLRT3
ENSG00000205978	478.223	1426.95	-1.5764	8.88368e-14	4.13947e-12	NYNRIN
ENSG00000106804	52.1194	155.587	-1.57805	4.63653e-12	1.65986e-10	C5
ENSG00000161642	90.5614	271.376	-1.58086	3.36699e-09	7.30605e-08	ZNF385A
ENSG00000204228	14.6325	44.1885	-1.5825	5.17686e-07	6.93807e-06	HSD17B8
ENSG00000164761	1176.75	3524.75	-1.58294	5.47227e-08	9.23991e-07	TNFRSF11B
ENSG00000132470	6.20716	18.6717	-1.58297	0.000461004	0.00279527	ITGB4
ENSG00000163975	360.967	1081.46	-1.58364	8.89308e-06	8.89698e-05	MELTF
ENSG00000182511	89.4216	269.254	-1.58536	1.81504e-10	4.95316e-09	FES
ENSG00000204103	61.0739	184.78	-1.59199	6.76281e-05	0.000529204	MAFB
ENSG00000109339	17.5777	52.883	-1.59208	0.000267809	0.00175317	MAPK10
ENSG00000274712	12.352	37.2248	-1.59755	5.10028e-06	5.40235e-05	AC005332.4
ENSG00000256092	6.01966	17.8633	-1.59795	0.00140944	0.00727886	AC137767.1
ENSG00000147872	626.242	1898.06	-1.60019	4.61009e-21	5.63885e-19	PLIN2
ENSG00000166483	292.118	885.138	-1.60092	1.02962e-18	9.40345e-17	WEE1
ENSG00000176909	10.6374	32.015	-1.60097	0.000285936	0.00185412	MAMSTR
ENSG00000162746	35.8931	108.293	-1.60142	1.72598e-08	3.2312e-07	FCRLB
ENSG00000168970	15.291	46.0153	-1.60332	0.000302778	0.00194867	JMJD7-PLA2G4B
ENSG00000079819	1293.08	3929.98	-1.60359	6.52153e-12	2.27137e-10	EPB41L2
ENSG00000163701	15.5101	47.7782	-1.60575	0.000101772	0.000755536	IL17RE
ENSG00000182575	21.2617	64.7492	-1.60728	1.17351e-05	0.000113054	NXPH3
ENSG00000164050	515.904	1572.15	-1.60812	9.15184e-15	4.91021e-13	PLXNB1
ENSG00000185567	3627.32	11067.9	-1.60943	2.14424e-12	8.15963e-11	AHNAK2
ENSG00000183615	21.1943	64.7472	-1.6133	2.82821e-05	0.00024553	FAM167B
ENSG00000105655	130.272	399.202	-1.61625	3.18288e-13	1.37985e-11	ISYNA1
ENSG00000143412	18.9673	58.12	-1.61703	8.76203e-07	1.10528e-05	ANXA9
ENSG00000186470	154.571	475.021	-1.61734	2.72954e-05	0.000237767	BTN3A2
ENSG00000139567	632.768	1942.97	-1.61832	5.35076e-10	1.37098e-08	ACVRL1
ENSG00000152784	128.895	396.662	-1.62108	2.07466e-09	4.65926e-08	PRDM8
ENSG00000109794	81.0285	249.371	-1.62438	1.22102e-11	4.04037e-10	FAM149A
ENSG00000153094	50.8725	158.135	-1.63033	1.4997e-08	2.82727e-07	BCL2L11
ENSG00000260855	10.4531	32.1914	-1.63104	5.51109e-05	0.000441166	AL591848.4
ENSG00000206561	10.4687	32.9204	-1.63198	0.00100204	0.00544157	COLQ
ENSG00000138356	451.108	1400.5	-1.63394	7.47909e-08	1.22168e-06	AOX1
ENSG00000145242	29.2353	91.0544	-1.63726	0.00117839	0.00626188	EPHA5
ENSG00000267480	5.61013	17.4859	-1.63885	0.000975802	0.00532159	AP001542.3
ENSG00000262089	6.7751	21.1931	-1.64014	3.11051e-05	0.000266992	AC040977.1
ENSG00000160190	18.0734	55.7018	-1.64044	0.00145535	0.00748208	SLC37A1
ENSG00000164845	16.3777	50.7364	-1.64285	0.000290375	0.00187934	FAM86FP
ENSG00000260912	11.0239	34.6187	-1.64343	0.000236386	0.00157353	AL158206.1
ENSG00000134508	357.349	1117.72	-1.64543	1.36625e-08	2.59954e-07	CABLES1
ENSG00000137198	15.9365	50.6954	-1.64687	2.92428e-05	0.000252802	GMPR
ENSG00000048740	543.371	1705.56	-1.65032	1.54444e-18	1.37389e-16	CELF2
ENSG00000124496	164.003	516.019	-1.65176	9.31055e-09	1.85031e-07	TRERF1
ENSG00000100065	69.4163	218.354	-1.65331	6.06594e-07	8.00058e-06	CARD10
ENSG00000184792	14.7242	46.4232	-1.6551	7.00847e-07	9.08624e-06	OSBP2
ENSG00000274370	67.5938	212.317	-1.65556	4.14823e-07	5.69799e-06	AC130371.2
ENSG00000010295	507.657	1599.54	-1.65576	2.83107e-26	5.28869e-24	IFFO1
ENSG00000253878	10.3283	32.639	-1.65698	5.71108e-08	9.57393e-07	AC087752.3
ENSG00000188015	42.5747	134.221	-1.65753	6.16302e-07	8.08401e-06	S100A3
ENSG00000279631	11.0958	35.5815	-1.65758	2.68917e-07	3.87244e-06	AL158211.5
ENSG00000196639	150.248	474.758	-1.65791	7.20448e-10	1.79666e-08	HRH1
ENSG00000247735	6.25822	20.0461	-1.66026	0.00140632	0.00726822	AC120114.1
ENSG00000060656	136.239	431.524	-1.66233	2.75062e-07	3.94987e-06	PTPRU
ENSG00000168490	17.6451	55.9444	-1.66576	2.96988e-08	5.33928e-07	PHYHIP
ENSG00000115594	1127.8	3590.22	-1.67024	3.64309e-09	7.86363e-08	IL1R1
ENSG00000076770	35.8079	114.622	-1.67152	0.000443532	0.00270529	MBNL3
ENSG00000259673	55.9202	178.266	-1.6748	5.2097e-07	6.96968e-06	IQCH-AS1
ENSG00000178919	26.3087	83.9765	-1.67617	0.000255201	0.00168351	FOXE1
ENSG00000272870	8.01559	25.0047	-1.6775	4.16384e-05	0.000345708	AC097534.2
ENSG00000241399	38.5904	123.237	-1.67993	1.92323e-11	6.17507e-10	CD302
ENSG00000178015	28.4164	91.7044	-1.68107	2.19038e-05	0.000196208	GPR150
ENSG00000215386	20.6589	66.5072	-1.68284	0.00113873	0.00608574	MIR99AHG
ENSG00000140285	1193.11	3831.97	-1.6833	3.32482e-13	1.43232e-11	FGF7
ENSG00000182463	229.776	739.816	-1.68487	1.23629e-07	1.92605e-06	TSHZ2
ENSG00000150556	12.3159	39.3233	-1.68695	0.00106768	0.00575395	LYPD6B
ENSG00000022267	2901.39	9342.61	-1.68707	9.17043e-05	0.000689006	FHL1
ENSG00000267395	7.26923	23.4004	-1.68786	0.000217391	0.00146273	DM1-AS
ENSG00000136826	1042.4	3359.19	-1.6883	2.65989e-09	5.88355e-08	KLF4
ENSG00000128340	119.763	386.763	-1.68935	1.49904e-06	1.79928e-05	RAC2
ENSG00000273179	16.6667	54.2526	-1.69168	0.000114826	0.000838805	AC092535.4
ENSG00000151490	3.82825	12.1789	-1.69681	0.00188441	0.00927489	PTPRO
ENSG00000225968	91.1594	295.926	-1.6985	2.12271e-05	0.000190478	ELFN1
ENSG00000173376	44.5761	144.84	-1.70104	3.52213e-05	0.0002976	NDNF
ENSG00000110881	89.6372	291.831	-1.70125	5.03467e-09	1.0514e-07	ASIC1
ENSG00000255150	18.4779	60.1346	-1.70381	4.70147e-08	8.05759e-07	EID3
ENSG00000231407	6.75971	21.7238	-1.70524	1.78304e-05	0.000163862	AL354732.1
ENSG00000164619	466.552	1522.06	-1.70607	2.21207e-06	2.55801e-05	BMPER
ENSG00000136235	3220.17	10507.8	-1.70629	2.27001e-12	8.54331e-11	GPNMB
ENSG00000166347	189.291	619.685	-1.71344	4.80975e-31	1.4324e-28	CYB5A
ENSG00000232855	23.1641	76.0506	-1.71371	7.66487e-05	0.000588365	AF165147.1
ENSG00000162426	25.5637	84.1461	-1.71512	5.44025e-15	3.0214e-13	SLC45A1
ENSG00000162645	102.473	337.481	-1.71676	1.05189e-05	0.000102442	GBP2
ENSG00000125246	5.08954	16.9694	-1.71852	0.000350678	0.00221181	CLYBL
ENSG00000171219	3.44627	11.0388	-1.72051	0.00196209	0.00958379	CDC42BPG
ENSG00000184451	16.449	54.4976	-1.72108	6.13518e-07	8.06085e-06	CCR10
ENSG00000108797	339.607	1122.41	-1.72459	7.87948e-10	1.93911e-08	CNTNAP1
ENSG00000273373	3.93202	13.0215	-1.72728	0.00114523	0.00611416	AL355488.1
ENSG00000116991	41.045	136.108	-1.73181	0.00069438	0.00397414	SIPA1L2
ENSG00000184584	373.251	1240.56	-1.73266	1.24519e-08	2.39359e-07	TMEM173
ENSG00000189057	13.5368	45.4935	-1.73405	0.00100324	0.00544522	FAM111B
ENSG00000173546	175.491	586.891	-1.74003	5.87412e-08	9.82159e-07	CSPG4
ENSG00000246985	10.5886	35.3071	-1.74057	3.05309e-05	0.000262612	SOCS2-AS1
ENSG00000064763	44.7747	150.266	-1.74266	5.59338e-10	1.42604e-08	FAR2
ENSG00000157470	7.38323	24.8528	-1.74292	1.83416e-05	0.000167586	FAM81A
ENSG00000204839	25.6872	86.1775	-1.74574	7.99638e-10	1.96079e-08	MROH6
ENSG00000213366	159.321	537.16	-1.75499	1.67797e-08	3.14892e-07	GSTM2
ENSG00000245532	3230.13	10905.2	-1.75535	2.32897e-06	2.67363e-05	NEAT1
ENSG00000120278	16.5717	55.9191	-1.7557	4.20458e-05	0.000348668	PLEKHG1
ENSG00000102878	56.3866	189.962	-1.75711	2.42281e-06	2.77207e-05	HSF4
ENSG00000232284	6.88367	23.1881	-1.75745	0.000354661	0.00223139	GNG12-AS1
ENSG00000085117	70.5325	238.892	-1.75782	0.00109149	0.00586071	CD82
ENSG00000168016	427.036	1443.82	-1.75825	1.61033e-12	6.2337e-11	TRANK1
ENSG00000153291	37.1871	125.76	-1.75972	0.000109861	0.000806841	SLC25A27
ENSG00000103490	41.7689	141.275	-1.76216	1.12873e-25	1.98242e-23	PYCARD
ENSG00000152253	8.63166	29.7252	-1.7651	0.00188585	0.00927754	SPC25
ENSG00000103145	197.22	671.598	-1.76775	9.40032e-35	4.39016e-32	HCFC1R1
ENSG00000074527	1154.21	3944.2	-1.7726	5.26717e-08	8.93765e-07	NTN4
ENSG00000169760	87.5589	299.46	-1.77291	7.39073e-10	1.8342e-08	NLGN1
ENSG00000261888	212.391	726.443	-1.77545	1.32016e-11	4.34048e-10	AC144831.1
ENSG00000206417	13.3263	45.6058	-1.77678	0.000105033	0.000776655	H1FX-AS1
ENSG00000186868	8.79772	30.1314	-1.77997	0.000220216	0.00147883	MAPT
ENSG00000231160	13.1181	45.5148	-1.78094	0.000365973	0.0022921	KLF3-AS1
ENSG00000261087	9.12766	31.3853	-1.78299	4.44581e-05	0.000365103	AP003469.4
ENSG00000272040	4.52625	15.6568	-1.78317	0.000126295	0.000911248	AC010245.2
ENSG00000105559	183.036	630.818	-1.78407	1.60671e-12	6.2337e-11	PLEKHA4
ENSG00000231672	12.9339	44.5384	-1.78432	0.00180866	0.00894818	DIRC3
ENSG00000048052	142.148	489.18	-1.78502	7.96029e-16	5.09583e-14	HDAC9
ENSG00000185339	156.373	538.61	-1.78733	6.79555e-15	3.72378e-13	TCN2
ENSG00000128284	140.034	483.479	-1.78743	1.14286e-08	2.20719e-07	APOL3
ENSG00000239332	7.05664	24.5759	-1.78784	0.00202288	0.00982468	LINC01119
ENSG00000197077	336.207	1162.86	-1.79043	9.7546e-10	2.31731e-08	KIAA1671
ENSG00000120899	256.095	885.843	-1.79082	3.16865e-07	4.48743e-06	PTK2B
ENSG00000198870	8.05249	27.51	-1.79205	3.44406e-06	3.77853e-05	STKLD1
ENSG00000076258	19.6168	68.7482	-1.79323	8.09189e-07	1.02896e-05	FMO4
ENSG00000061918	6.95317	24.2083	-1.79641	0.000820468	0.00457898	GUCY1B1
ENSG00000146374	5.88036	20.9329	-1.7971	0.0012558	0.00662866	RSPO3
ENSG00000260461	10.047	34.4986	-1.80347	1.75705e-06	2.07384e-05	AL133355.1
ENSG00000152154	8.59419	30.1138	-1.80544	0.00183614	0.00906337	TMEM178A
ENSG00000101017	32.2949	113.206	-1.80857	0.000210414	0.00142136	CD40
ENSG00000081189	34.2508	120.284	-1.80953	4.0291e-13	1.71416e-11	MEF2C
ENSG00000213145	3.73137	12.6389	-1.81252	0.000822616	0.00458621	CRIP1
ENSG00000255471	12.4442	44.14	-1.81304	2.42415e-08	4.42397e-07	AP001528.2
ENSG00000198873	367.682	1292.77	-1.81408	1.3967e-17	1.11243e-15	GRK5
ENSG00000118997	7.60339	27.2336	-1.81783	0.000180295	0.00124912	DNAH7
ENSG00000110076	12.5191	43.878	-1.82228	0.00148287	0.00760457	NRXN2
ENSG00000184232	1206.78	4269.8	-1.823	4.59515e-32	1.60044e-29	OAF
ENSG00000140876	4.84448	17.3412	-1.82366	0.00102855	0.00556642	NUDT7
ENSG00000126016	93.1467	329.242	-1.82375	3.94081e-16	2.60385e-14	AMOT
ENSG00000186665	106.23	376.684	-1.82587	4.10768e-09	8.77428e-08	C17orf58
ENSG00000128016	276.232	977.641	-1.82623	1.6752e-36	9.05885e-34	ZFP36
ENSG00000127472	18.7616	66.3067	-1.82647	0.000535801	0.00317662	PLA2G5
ENSG00000159403	2496.4	8870.87	-1.82927	8.55187e-18	7.00129e-16	C1R
ENSG00000172020	10.5475	37.7672	-1.82939	0.00204301	0.00991541	GAP43
ENSG00000279716	5.92017	20.7445	-1.82942	1.07706e-05	0.000104546	AC006128.1
ENSG00000101871	259.295	926.188	-1.83794	4.00628e-11	1.22129e-09	MID1
ENSG00000228393	3.45402	12.6445	-1.84805	0.000853029	0.00473242	LINC01004
ENSG00000172572	66.2215	240.113	-1.8496	7.71975e-11	2.23941e-09	PDE3A
ENSG00000261455	20.7634	75.4244	-1.85085	3.35612e-10	8.85301e-09	LINC01003
ENSG00000266714	31.498	113.109	-1.8525	3.21715e-08	5.73865e-07	MYO15B
ENSG00000116819	3.96968	14.2259	-1.85285	0.000341552	0.00216622	TFAP2E
ENSG00000163879	26.3334	95.3723	-1.85337	2.1504e-08	3.95247e-07	DNALI1
ENSG00000250295	9.42326	34.1784	-1.85337	0.00122864	0.00650033	RDH10-AS1
ENSG00000235706	8.26502	29.6452	-1.85541	0.000171317	0.00119615	DICER1-AS1
ENSG00000034239	5.67778	21.0531	-1.85657	0.00136566	0.00710096	EFCAB1
ENSG00000011465	14292	51764.5	-1.85674	1.54872e-07	2.35913e-06	DCN
ENSG00000139597	26.1977	94.9053	-1.85723	1.08456e-08	2.10848e-07	N4BP2L1
ENSG00000115107	217.41	787.994	-1.85859	2.30891e-13	1.01597e-11	STEAP3
ENSG00000198483	39.3402	143.47	-1.86153	6.07793e-06	6.34309e-05	ANKRD35
ENSG00000168646	43.0775	156.734	-1.86327	2.19965e-13	9.72058e-12	AXIN2
ENSG00000008277	7.10764	26.1532	-1.86542	6.78576e-07	8.84032e-06	ADAM22
ENSG00000120500	2.90355	10.5973	-1.86744	0.000937535	0.00514356	ARR3
ENSG00000163131	22.699	83.3442	-1.87039	0.00108457	0.00583118	CTSS
ENSG00000136717	597.494	2190.41	-1.87456	5.84087e-12	2.05873e-10	BIN1
ENSG00000177990	8.42801	30.7571	-1.87854	1.84636e-05	0.000168476	DPY19L2
ENSG00000236901	3.57124	13.0286	-1.8792	0.000543089	0.00321519	MIR600HG
ENSG00000162148	7.3416	27.2206	-1.88036	7.58042e-05	0.00058319	PPP1R32
ENSG00000173267	19.9812	73.9436	-1.88077	4.38663e-05	0.000361721	SNCG
ENSG00000160097	46.0601	169.908	-1.88197	2.42978e-05	0.000214843	FNDC5
ENSG00000242265	168.37	624.879	-1.88814	2.16987e-23	3.07508e-21	PEG10
ENSG00000166839	64.0745	237.694	-1.89013	1.48259e-11	4.82817e-10	ANKDD1A
ENSG00000221818	264.837	983.048	-1.89275	2.28753e-10	6.17694e-09	EBF2
ENSG00000246273	26.6546	98.7338	-1.89289	3.32739e-06	3.6721e-05	SBF2-AS1
ENSG00000187013	4.69414	17.5521	-1.89334	0.000485991	0.0029217	C17orf82
ENSG00000016402	34.6805	129.772	-1.89594	1.21358e-06	1.47912e-05	IL20RA
ENSG00000242419	3.03182	11.5249	-1.89821	0.00187457	0.00923091	PCDHGC4
ENSG00000149090	1294.23	4839.66	-1.90271	0.00093765	0.00514356	PAMR1
ENSG00000102032	44.4604	165.481	-1.90404	9.25951e-08	1.48419e-06	RENBP
ENSG00000148175	878.398	3289.99	-1.90447	7.92114e-21	9.19613e-19	STOM
ENSG00000255346	8.06898	30.2844	-1.90491	0.000802194	0.00449502	NOX5
ENSG00000182957	69.4293	260.445	-1.90634	7.72622e-10	1.90596e-08	SPATA13
ENSG00000134470	49.2312	185.029	-1.90803	1.18852e-06	1.45697e-05	IL15RA
ENSG00000198133	19.9749	74.8177	-1.90857	1.23716e-14	6.41979e-13	TMEM229B
ENSG00000107968	61.3598	230.941	-1.91042	1.53147e-15	9.28326e-14	MAP3K8
ENSG00000109674	15.1891	57.6583	-1.91174	7.08504e-06	7.26137e-05	NEIL3
ENSG00000170381	20.2786	76.8177	-1.91388	0.000261802	0.00171878	SEMA3E
ENSG00000165695	4.96607	18.2674	-1.91605	0.000200328	0.00136264	AK8
ENSG00000105516	38.516	145.824	-1.91766	7.01494e-07	9.08891e-06	DBP
ENSG00000054654	68.9772	262.242	-1.92698	7.97941e-05	0.000608871	SYNE2
ENSG00000272316	23.7431	89.7994	-1.93241	6.08546e-07	8.01603e-06	AL021368.2
ENSG00000231609	7.15384	27.0649	-1.93488	3.69047e-06	4.02097e-05	AC007098.1
ENSG00000197822	8.08319	30.9898	-1.93868	0.000564802	0.0033284	OCLN
ENSG00000166278	19.1492	73.3069	-1.93889	0.000174941	0.00121818	C2
ENSG00000178078	8.25272	32.442	-1.94191	1.35036e-05	0.000128347	STAP2
ENSG00000259605	4.51062	17.1072	-1.94913	0.000846326	0.00470286	AC074212.1
ENSG00000129596	36.715	142.365	-1.9507	0.00050838	0.00303507	CDO1
ENSG00000227953	4.81267	18.0616	-1.95077	7.85924e-05	0.000601264	LINC01341
ENSG00000223820	4.04532	16.2502	-1.95123	0.000633628	0.00367912	CFL1P1
ENSG00000137561	4.15353	16.0634	-1.95348	0.00137152	0.00712959	TTPA
ENSG00000197321	662.53	2565.28	-1.95369	5.79172e-17	4.19064e-15	SVIL
ENSG00000128510	74.9334	290.777	-1.95508	0.000440917	0.00269334	CPA4
ENSG00000173269	11.8808	45.9665	-1.9605	0.000150896	0.00106997	MMRN2
ENSG00000112297	34.8738	136.081	-1.96065	0.000126654	0.000913518	CRYBG1
ENSG00000162755	10.4436	40.6977	-1.97103	2.42155e-11	7.65544e-10	KLHDC9
ENSG00000065320	10.5918	41.8594	-1.97105	3.27532e-07	4.61939e-06	NTN1
ENSG00000176771	75.9337	298.129	-1.9711	2.11429e-06	2.45739e-05	NCKAP5
ENSG00000005189	20.5364	80.6351	-1.97291	1.10315e-15	6.91119e-14	REXO5
ENSG00000243710	5.52937	21.7426	-1.97299	0.000634811	0.00368383	CFAP57
ENSG00000108947	7.10403	27.7893	-1.97315	0.000846867	0.00470459	EFNB3
ENSG00000147437	7.12282	28.2477	-1.97323	1.19335e-06	1.45965e-05	GNRH1
ENSG00000235098	17.8475	70.3623	-1.97375	1.38988e-11	4.54788e-10	ANKRD65
ENSG00000165633	447.903	1764.08	-1.97856	1.50088e-24	2.37242e-22	VSTM4
ENSG00000165124	2753.31	10852.8	-1.9789	1.0248e-10	2.8808e-09	SVEP1
ENSG00000211445	705.95	2790.52	-1.98328	3.88227e-12	1.40205e-10	GPX3
ENSG00000114200	73.4807	291.373	-1.98715	2.09247e-07	3.09117e-06	BCHE
ENSG00000111261	90.5177	360.309	-1.99186	2.58922e-13	1.13445e-11	MANSC1
ENSG00000172935	270.383	1084.23	-2.0023	2.1841e-39	1.44777e-36	MRGPRF
ENSG00000197769	6.29108	25.4079	-2.0031	0.000465613	0.00281823	MAP1LC3C
ENSG00000113555	4.5085	17.717	-2.00448	0.000116258	0.000847456	PCDH12
ENSG00000148344	550.056	2208.19	-2.00503	3.07211e-08	5.50863e-07	PTGES
ENSG00000103154	6.85435	27.9259	-2.00533	1.00431e-05	9.86973e-05	NECAB2
ENSG00000279196	8.24316	33.208	-2.00546	6.70886e-06	6.92417e-05	AC135048.4
ENSG00000124212	3529.54	14229.1	-2.01128	5.30616e-07	7.08027e-06	PTGIS
ENSG00000204219	64.3993	260.31	-2.01131	5.17207e-07	6.93739e-06	TCEA3
ENSG00000168350	2.75882	10.9804	-2.01397	0.00113991	0.00608889	DEGS2
ENSG00000198785	2.99476	12.3419	-2.01961	0.00121274	0.00643113	GRIN3A
ENSG00000167363	46.5146	188.235	-2.02024	4.22995e-10	1.09611e-08	FN3K
ENSG00000243649	28.1307	114.344	-2.02336	2.88199e-07	4.12697e-06	CFB
ENSG00000162551	22.0195	89.3424	-2.02433	0.00108412	0.00583031	ALPL
ENSG00000161381	42.263	171.95	-2.02491	9.47069e-06	9.38028e-05	PLXDC1
ENSG00000138111	5.65766	23.3086	-2.03223	0.0013886	0.00719113	MFSD13A
ENSG00000075651	68.0435	279.979	-2.03533	3.31064e-07	4.666e-06	PLD1
ENSG00000178226	5.02045	20.4617	-2.03807	3.87201e-06	4.20095e-05	PRSS36
ENSG00000216775	36.7772	151.512	-2.04457	1.64985e-05	0.000153407	AL109918.1
ENSG00000120833	54.7513	225.009	-2.04471	1.38341e-11	4.54116e-10	SOCS2
ENSG00000196468	30.5877	127.119	-2.04721	0.000779787	0.0043925	FGF16
ENSG00000254343	90.4354	377.781	-2.06556	9.35622e-10	2.24604e-08	AC091563.1
ENSG00000188906	99.1216	414.79	-2.06568	1.9749e-19	1.91426e-17	LRRK2
ENSG00000197442	30.1796	126.991	-2.06638	4.50976e-08	7.78094e-07	MAP3K5
ENSG00000166979	9.87037	42.4333	-2.07002	1.12641e-07	1.76826e-06	EVA1C
ENSG00000164764	43.6317	182.372	-2.0701	0.000433721	0.00265765	SBSPON
ENSG00000147576	9.55539	39.8106	-2.07619	2.88348e-08	5.20216e-07	ADHFE1
ENSG00000232640	2.06924	8.76594	-2.07665	0.0014692	0.007542	AL354892.2
ENSG00000064201	5.29954	22.0943	-2.07669	1.6438e-05	0.000152982	TSPAN32
ENSG00000161249	185.152	784.225	-2.0822	1.5028e-07	2.29769e-06	DMKN
ENSG00000153721	48.8891	207.238	-2.08237	1.89559e-10	5.15927e-09	CNKSR3
ENSG00000122547	43.849	187.544	-2.08714	2.18674e-14	1.09066e-12	EEPD1
ENSG00000121957	115.191	491.605	-2.09129	2.99548e-11	9.3264e-10	GPSM2
ENSG00000058668	1820.34	7770.15	-2.09373	2.4242e-29	6.00178e-27	ATP2B4
ENSG00000112769	2350.43	10044.2	-2.09545	3.00313e-08	5.38964e-07	LAMA4
ENSG00000244694	22.0002	94.655	-2.09662	8.22913e-06	8.31473e-05	PTCHD4
ENSG00000102174	6.77929	29.4186	-2.10174	0.0010745	0.00578309	PHEX
ENSG00000198624	87.507	375.708	-2.10252	1.10949e-08	2.15084e-07	CCDC69
ENSG00000196730	218.236	937.303	-2.1028	0.000586014	0.00343469	DAPK1
ENSG00000105479	4.12052	17.7791	-2.10791	0.000774435	0.00436475	CCDC114
ENSG00000105339	87.8971	379.147	-2.11146	1.36085e-20	1.53648e-18	DENND3
ENSG00000187098	93.1353	403.282	-2.11205	6.28811e-18	5.26824e-16	MITF
ENSG00000164742	12.0514	52.0665	-2.11267	1.92268e-05	0.000174587	ADCY1
ENSG00000234814	13.3287	58.3835	-2.11558	8.98125e-05	0.000676772	SVIL2P
ENSG00000172183	10.1276	44.4152	-2.11845	1.69502e-06	2.01335e-05	ISG20
ENSG00000120915	32.1905	140.36	-2.11887	1.44019e-11	4.69754e-10	EPHX2
ENSG00000238105	4.46041	19.0469	-2.11887	7.65595e-06	7.79208e-05	GOLGA2P5
ENSG00000168961	12.7461	55.6411	-2.12074	5.33817e-05	0.000429163	LGALS9
ENSG00000108950	255.788	1119	-2.12837	0.000377961	0.00236071	FAM20A
ENSG00000227591	2.97097	12.8931	-2.13246	0.000917604	0.00504977	AL031316.1
ENSG00000100206	2.1117	9.73778	-2.13485	0.00110308	0.00591988	DMC1
ENSG00000121769	709.649	3129.48	-2.14079	0.000558632	0.00329582	FABP3
ENSG00000163661	9538.66	42110.6	-2.14236	6.26174e-14	3.00637e-12	PTX3
ENSG00000273356	3.16226	13.8202	-2.14359	0.000212213	0.00143211	LINC02019
ENSG00000013588	153.249	679.979	-2.14995	8.85042e-15	4.76093e-13	GPRC5A
ENSG00000161921	14.1299	62.9222	-2.15005	1.56605e-05	0.000146543	CXCL16
ENSG00000188747	11.9462	52.8857	-2.15094	0.000139752	0.000998177	NOXA1
ENSG00000122966	69.4607	310.145	-2.15304	7.67438e-06	7.80311e-05	CIT
ENSG00000108830	5.03709	22.2899	-2.15553	9.59864e-05	0.000717767	RND2
ENSG00000215270	4.92445	22.0648	-2.15843	0.00026559	0.00174031	AP000523.1
ENSG00000137727	153.718	687.096	-2.16058	7.94954e-12	2.70456e-10	ARHGAP20
ENSG00000178726	53.7688	241.286	-2.16612	3.60447e-08	6.36873e-07	THBD
ENSG00000138642	14.4565	65.1737	-2.17679	8.93423e-07	1.12562e-05	HERC6
ENSG00000254192	10.556	47.8853	-2.1811	1.92564e-06	2.25856e-05	AC011365.2
ENSG00000145911	10.262	46.8029	-2.18312	1.17564e-05	0.000113191	N4BP3
ENSG00000189184	1239.9	5642.05	-2.18592	1.62347e-16	1.11574e-14	PCDH18
ENSG00000080031	57.1171	260.313	-2.18792	0.00162989	0.00823119	PTPRH
ENSG00000185215	622.785	2840.11	-2.18924	4.01868e-27	8.17622e-25	TNFAIP2
ENSG00000197142	29.0432	133.586	-2.20264	1.67183e-17	1.32133e-15	ACSL5
ENSG00000134245	27.4814	126.813	-2.20299	4.41294e-07	6.02535e-06	WNT2B
ENSG00000120262	5.78653	26.2714	-2.20685	3.36878e-06	3.70981e-05	CCDC170
ENSG00000144152	82.4041	380.246	-2.21007	1.13485e-57	2.33199e-54	FBLN7
ENSG00000101470	4.96332	23.3887	-2.21426	0.000337752	0.00214875	TNNC2
ENSG00000063180	7.11258	33.3149	-2.21658	2.21957e-06	2.56524e-05	CA11
ENSG00000137501	33.0044	154.296	-2.21994	0.000236516	0.00157379	SYTL2
ENSG00000131016	1696.22	7940.59	-2.22689	8.39654e-17	5.94967e-15	AKAP12
ENSG00000183873	7.79122	37.1507	-2.23675	2.392e-05	0.000211914	SCN5A
ENSG00000105499	26.6936	124.927	-2.2384	1.88506e-07	2.82127e-06	PLA2G4C
ENSG00000184254	442.581	2091.52	-2.24017	5.9257e-29	1.43256e-26	ALDH1A3
ENSG00000196154	1546.03	7318.31	-2.24287	9.26222e-11	2.62162e-09	S100A4
ENSG00000136859	1056.42	5019.45	-2.2481	4.87707e-07	6.58036e-06	ANGPTL2
ENSG00000143382	210.742	1004.6	-2.25208	3.19069e-08	5.70135e-07	ADAMTSL4
ENSG00000159212	5.31791	25.4141	-2.25469	0.000302559	0.00194838	CLIC6
ENSG00000125730	267.991	1279.09	-2.25531	1.50884e-07	2.30521e-06	C3
ENSG00000255974	2.64788	12.7873	-2.2554	0.00020109	0.00136602	CYP2A6
ENSG00000171522	12.5327	60.0898	-2.26158	0.000642122	0.00371899	PTGER4
ENSG00000139832	11.7033	56.4372	-2.26525	3.10476e-10	8.23221e-09	RAB20
ENSG00000146592	77.7625	375.337	-2.26993	1.01263e-12	4.06416e-11	CREB5
ENSG00000116741	33.2048	162.158	-2.27902	2.68915e-07	3.87244e-06	RGS2
ENSG00000197977	11.9979	58.3706	-2.27913	4.10981e-05	0.000341913	ELOVL2
ENSG00000165244	23.672	116.006	-2.28122	1.3665e-06	1.64984e-05	ZNF367
ENSG00000204789	3.50168	17.0702	-2.28132	4.54768e-05	0.000372757	ZNF204P
ENSG00000226237	9.16889	43.9029	-2.29722	6.00972e-09	1.23494e-07	GAS1RR
ENSG00000131477	9.54243	46.631	-2.29825	1.78652e-05	0.000164036	RAMP2
ENSG00000227438	3.04115	15.2505	-2.30309	4.90359e-05	0.000397962	AP001471.1
ENSG00000145569	2.16088	11.0191	-2.30799	0.00129613	0.00680312	OTULINL
ENSG00000150782	4.14903	20.4893	-2.3083	0.00125106	0.00660535	IL18
ENSG00000139910	11.5399	56.8895	-2.31375	1.01909e-05	9.98626e-05	NOVA1
ENSG00000260230	4.70093	23.4679	-2.31497	0.000803168	0.00449831	FRRS1L
ENSG00000258572	2.5922	12.6202	-2.31542	0.00100305	0.00544522	AL133467.1
ENSG00000129048	117.74	586.873	-2.31825	1.72923e-06	2.04806e-05	ACKR4
ENSG00000274737	1.61058	8.23983	-2.31847	0.00154104	0.00784211	AC004466.2
ENSG00000236829	3.77583	18.6892	-2.31881	8.71234e-06	8.74169e-05	Z97634.1
ENSG00000103811	22.1003	110.636	-2.31896	7.3172e-05	0.000565693	CTSH
ENSG00000115525	178.607	895.245	-2.32511	1.59045e-12	6.18979e-11	ST3GAL5
ENSG00000145002	3.95041	19.3362	-2.32541	0.000584992	0.00343065	FAM86B2
ENSG00000104432	7.88499	38.433	-2.32577	4.82233e-08	8.24409e-07	IL7
ENSG00000204634	68.6881	344.402	-2.33154	5.87707e-16	3.8339e-14	TBC1D8
ENSG00000257732	8.05426	40.5723	-2.33263	2.05013e-06	2.38957e-05	AC089983.1
ENSG00000119946	5.86462	29.476	-2.33569	0.00158763	0.0080534	CNNM1
ENSG00000136531	5.12598	26.0462	-2.33823	3.36465e-05	0.000286058	SCN2A
ENSG00000159640	194.522	985.394	-2.33931	1.54862e-12	6.04992e-11	ACE
ENSG00000165821	17.465	89.4496	-2.3405	4.51967e-07	6.1588e-06	SALL2
ENSG00000198520	5.91809	29.8571	-2.34093	0.000474887	0.00286508	ARMH1
ENSG00000151150	16.7068	85.2266	-2.34339	1.59786e-08	3.00958e-07	ANK3
ENSG00000186479	42.4053	215.636	-2.34873	0.00198444	0.00967224	RGS7BP
ENSG00000108551	19.7564	101.23	-2.35105	5.85545e-09	1.20686e-07	RASD1
ENSG00000260285	22.8091	115.568	-2.35119	8.35159e-11	2.40024e-09	AL133367.1
ENSG00000173947	3.97404	20.8529	-2.35827	1.76817e-05	0.000162641	PIFO
ENSG00000168916	15.0016	77.7062	-2.3597	7.66834e-13	3.13898e-11	ZNF608
ENSG00000198846	11.9575	61.4108	-2.35985	0.00128703	0.00676744	TOX
ENSG00000273148	2.53333	12.8962	-2.36344	0.000271103	0.00176966	AL035563.1
ENSG00000272908	6.1768	31.5819	-2.36421	0.000371563	0.00232428	AC006033.2
ENSG00000203797	6.77963	34.4434	-2.3664	7.66916e-09	1.54201e-07	DDO
ENSG00000106258	10.0706	52.5338	-2.36682	3.99277e-05	0.00033285	CYP3A5
ENSG00000175287	28.1495	146.182	-2.37092	2.52907e-07	3.67018e-06	PHYHD1
ENSG00000119922	161.793	837.682	-2.37271	2.46827e-15	1.44503e-13	IFIT2
ENSG00000185885	41.9597	218.686	-2.38131	6.58547e-06	6.81051e-05	IFITM1
ENSG00000270179	1.72474	8.77271	-2.38669	0.00198264	0.00966809	AP002840.2
ENSG00000170873	47.8045	250.784	-2.38702	3.88386e-07	5.37949e-06	MTSS1
ENSG00000144712	10.1586	53.6604	-2.39017	4.21218e-09	8.98817e-08	CAND2
ENSG00000069702	781.631	4101.31	-2.39158	1.57157e-25	2.69118e-23	TGFBR3
ENSG00000143320	306.25	1611.86	-2.39529	2.83729e-12	1.05241e-10	CRABP2
ENSG00000167191	385.397	2033.23	-2.39872	5.96024e-11	1.77074e-09	GPRC5B
ENSG00000258311	7.98118	41.8661	-2.40011	1.20072e-06	1.46591e-05	BLOC1S1-RDH5
ENSG00000279204	8.8844	48.2493	-2.40194	2.02984e-07	3.00946e-06	AC134043.2
ENSG00000143387	2880.04	15264.7	-2.40605	7.91709e-10	1.94371e-08	CTSK
ENSG00000029534	18.6161	99.5978	-2.41332	3.53894e-06	3.87023e-05	ANK1
ENSG00000160712	29.8605	159.122	-2.41338	1.48854e-21	1.91175e-19	IL6R
ENSG00000187151	1.77872	9.7892	-2.41387	0.00149408	0.0076544	ANGPTL5
ENSG00000155093	4.05929	21.9279	-2.42094	7.97052e-05	0.000608644	PTPRN2
ENSG00000117595	4.73752	25.6825	-2.42104	0.00144095	0.00742108	IRF6
ENSG00000139780	2.12294	11.2186	-2.42263	0.000204239	0.00138466	METTL21C
ENSG00000126217	26.3936	141.777	-2.4278	6.72195e-05	0.000526809	MCF2L
ENSG00000162545	111.658	601.523	-2.42985	0.000128364	0.000924551	CAMK2N1
ENSG00000107099	3.45963	18.7401	-2.43198	0.000767582	0.00433206	DOCK8
ENSG00000115267	21.3185	115.329	-2.44208	2.06743e-10	5.60469e-09	IFIH1
ENSG00000050628	73.7574	401.078	-2.44321	9.9661e-28	2.17865e-25	PTGER3
ENSG00000126822	36.8085	199.618	-2.44331	3.29357e-09	7.17605e-08	PLEKHG3
ENSG00000238184	2.09396	11.9549	-2.44413	0.000801892	0.00449484	CD81-AS1
ENSG00000003436	323.194	1762.04	-2.44605	3.93321e-15	2.25135e-13	TFPI
ENSG00000111452	764.715	4178.02	-2.44985	7.41684e-05	0.000572319	ADGRD1
ENSG00000164035	9.07184	49.7207	-2.45108	6.01518e-05	0.000477612	EMCN
ENSG00000157873	137.895	755.753	-2.45501	3.41824e-11	1.05152e-09	TNFRSF14
ENSG00000171817	5.29453	28.8979	-2.46632	1.01459e-07	1.61119e-06	ZNF540
ENSG00000108984	6.05476	33.9293	-2.46912	2.42456e-06	2.77253e-05	MAP2K6
ENSG00000185008	6.22878	34.3135	-2.47433	0.00149823	0.00766804	ROBO2
ENSG00000166949	609.177	3387.84	-2.4755	2.2081e-51	3.24102e-48	SMAD3
ENSG00000134802	38.623	216.504	-2.47798	1.16545e-10	3.2407e-09	SLC43A3
ENSG00000108622	8.10474	45.6741	-2.48164	9.10236e-08	1.46243e-06	ICAM2
ENSG00000225279	6.44983	35.6195	-2.48455	3.68973e-05	0.000310231	AL121987.1
ENSG00000156049	8.59658	47.9164	-2.48506	1.55786e-06	1.86281e-05	GNA14
ENSG00000163884	39.9448	224.199	-2.49383	1.50276e-10	4.13943e-09	KLF15
ENSG00000164849	2.66523	14.4224	-2.49738	6.32579e-05	0.000499189	GPR146
ENSG00000189001	43.3968	245.543	-2.49988	1.70975e-07	2.58146e-06	SBSN
ENSG00000260645	1.21281	7.01748	-2.50449	0.00167562	0.00841662	AL359715.2
ENSG00000112096	1508.55	8568.45	-2.50584	0.000108375	0.000797061	SOD2
ENSG00000132481	60.7477	344.779	-2.51054	4.26536e-21	5.24843e-19	TRIM47
ENSG00000132561	75.965	434.028	-2.51686	3.05163e-16	2.03598e-14	MATN2
ENSG00000214357	8.24339	48.1229	-2.51712	0.000260999	0.00171405	NEURL1B
ENSG00000064309	77.43	443.511	-2.5178	8.39807e-12	2.83836e-10	CDON
ENSG00000171873	5.49096	31.7183	-2.5186	1.81418e-07	2.72511e-06	ADRA1D
ENSG00000230438	4.95723	29.0207	-2.52852	2.74105e-05	0.000238568	SERPINB9P1
ENSG00000197635	884.287	5120.79	-2.53372	8.11853e-08	1.31775e-06	DPP4
ENSG00000272842	1.47145	8.44189	-2.53552	0.0013174	0.00690135	AL391834.1
ENSG00000238164	3.52423	20.4953	-2.53675	0.000250873	0.00165709	TNFRSF14-AS1
ENSG00000182329	2.28111	13.9706	-2.54326	0.000281009	0.00182851	KIAA2012
ENSG00000204397	4.96593	28.9731	-2.54376	3.03723e-05	0.000261357	CARD16
ENSG00000249087	14.3087	85.015	-2.55055	8.19547e-11	2.35866e-09	ZNF436-AS1
ENSG00000185101	2.73498	15.9454	-2.55093	2.03346e-05	0.00018327	ANO9
ENSG00000038945	4.36159	25.5123	-2.55124	9.18791e-06	9.14297e-05	MSR1
ENSG00000285744	1.71432	9.85285	-2.55271	0.000780207	0.00439366	AC083837.2
ENSG00000181800	1.4778	8.60218	-2.55393	0.00188427	0.00927489	CELF2-AS1
ENSG00000049089	4.34216	26.3762	-2.55721	0.000226962	0.00152065	COL9A2
ENSG00000106823	154.83	911.635	-2.55803	9.59578e-10	2.28222e-08	ECM2
ENSG00000111319	3.11134	17.6218	-2.55992	1.38796e-05	0.000131434	SCNN1A
ENSG00000083067	6.56607	38.8378	-2.56342	5.08848e-05	0.000411504	TRPM3
ENSG00000179604	208.487	1232.43	-2.56421	9.59913e-34	3.94505e-31	CDC42EP4
ENSG00000162654	3.58389	21.7595	-2.56976	6.21208e-06	6.4541e-05	GBP4
ENSG00000113494	1.68644	10.6568	-2.57344	0.00117534	0.00624729	PRLR
ENSG00000166165	218.52	1300.05	-2.57388	7.57095e-21	8.83951e-19	CKB
ENSG00000110436	18.1464	109.667	-2.59388	6.72705e-06	6.93947e-05	SLC1A2
ENSG00000154736	611.133	3701.45	-2.59835	1.3926e-08	2.64722e-07	ADAMTS5
ENSG00000221852	5.29236	32.1947	-2.59903	1.31382e-05	0.000125454	KRTAP1-5
ENSG00000165071	2.38878	13.978	-2.59923	8.40443e-06	8.47828e-05	TMEM71
ENSG00000109861	250.758	1526.24	-2.60502	1.01798e-15	6.39706e-14	CTSC
ENSG00000135363	11.3981	70.5322	-2.60558	1.75594e-08	3.28026e-07	LMO2
ENSG00000176912	3.01791	18.7477	-2.60664	2.21984e-05	0.000198414	TYMSOS
ENSG00000141338	409.468	2495.22	-2.60701	9.82096e-12	3.28148e-10	ABCA8
ENSG00000145861	8.86336	54.7269	-2.61017	1.25456e-08	2.40709e-07	C1QTNF2
ENSG00000048540	8.80416	53.1002	-2.61043	1.27366e-08	2.43919e-07	LMO3
ENSG00000144596	10.4214	64.6556	-2.62309	0.000947125	0.00518723	GRIP2
ENSG00000167536	5.80214	35.8442	-2.62574	1.20261e-07	1.87784e-06	DHRS13
ENSG00000131242	8.09991	49.4627	-2.62589	8.08469e-09	1.62239e-07	RAB11FIP4
ENSG00000141665	1.85022	11.4869	-2.62958	0.000190501	0.00130792	FBXO15
ENSG00000182175	27.9302	173.633	-2.6318	3.06324e-09	6.69643e-08	RGMA
ENSG00000237356	1.82485	11.5436	-2.63632	4.76692e-05	0.000387943	AL365295.1
ENSG00000183287	46.7789	293.701	-2.6492	5.37241e-11	1.61165e-09	CCBE1
ENSG00000123572	123.017	772.297	-2.65047	0.000408332	0.00252507	NRK
ENSG00000064687	66.5869	419.193	-2.65459	3.46981e-16	2.30748e-14	ABCA7
ENSG00000266094	20.0978	126.453	-2.65595	4.89538e-09	1.02543e-07	RASSF5
ENSG00000164048	65.7176	417.184	-2.66513	2.55527e-19	2.45366e-17	ZNF589
ENSG00000172348	98.7439	627.94	-2.66923	7.65234e-12	2.61644e-10	RCAN2
ENSG00000187955	726.295	4620.7	-2.66926	6.97731e-06	7.16884e-05	COL14A1
ENSG00000149970	41.0694	261.626	-2.67054	2.77303e-25	4.70934e-23	CNKSR2
ENSG00000204261	2.36019	14.6351	-2.67338	3.81584e-06	4.14438e-05	PSMB8-AS1
ENSG00000172296	16.4563	106.011	-2.6734	4.63685e-06	4.9446e-05	SPTLC3
ENSG00000231749	4.1203	25.884	-2.67368	8.68172e-05	0.000656126	ABCA9-AS1
ENSG00000204659	1.20391	7.84926	-2.67443	0.000752789	0.00426497	CBY3
ENSG00000255690	27.9345	179.123	-2.67483	2.71268e-09	5.99386e-08	TRIL
ENSG00000155962	16.5746	106.393	-2.67588	8.07247e-11	2.32979e-09	CLIC2
ENSG00000137101	6.32338	40.7753	-2.67691	9.50344e-10	2.2655e-08	CD72
ENSG00000174326	1.34304	9.07031	-2.67785	0.000655545	0.00378712	SLC16A11
ENSG00000254300	4.44082	28.2996	-2.68292	0.000214024	0.00144338	LINC01111
ENSG00000275591	1.1632	7.78598	-2.68356	0.00150018	0.00767417	XKR5
ENSG00000005379	9.50113	59.9595	-2.68641	1.02166e-05	0.000100019	TSPOAP1
ENSG00000196220	9.71547	62.6118	-2.68709	2.01484e-09	4.55438e-08	SRGAP3
ENSG00000166578	3.74721	23.2377	-2.68865	4.21579e-07	5.78307e-06	IQCD
ENSG00000184408	181.505	1174.99	-2.69181	6.41578e-36	3.29595e-33	KCND2
ENSG00000154258	455.484	2943.62	-2.69196	1.85346e-15	1.10397e-13	ABCA9
ENSG00000172460	4.39388	28.6786	-2.69332	0.000556195	0.00328427	PRSS30P
ENSG00000196549	385.627	2496.55	-2.69484	2.97941e-20	3.22231e-18	MME
ENSG00000157766	313.977	2036.75	-2.69771	6.84434e-09	1.38839e-07	ACAN
ENSG00000177570	58.0523	381.53	-2.71621	3.96891e-23	5.5481e-21	SAMD12
ENSG00000153902	5.93384	39.2657	-2.71843	1.91958e-07	2.86667e-06	LGI4
ENSG00000119508	8.18654	53.624	-2.72022	7.05673e-13	2.89874e-11	NR4A3
ENSG00000250510	8.00401	53.7974	-2.72043	4.54287e-07	6.18222e-06	GPR162
ENSG00000256612	1.2782	8.29489	-2.72241	0.00155007	0.00788035	CYP2B7P
ENSG00000162407	2009.14	13269.4	-2.72375	1.20796e-68	4.96446e-65	PLPP3
ENSG00000140297	5.76768	37.9699	-2.73155	6.16464e-06	6.41403e-05	GCNT3
ENSG00000144730	54.824	364.56	-2.73228	0.000540939	0.00320431	IL17RD
ENSG00000149451	835.239	5560.09	-2.73488	1.32658e-14	6.83207e-13	ADAM33
ENSG00000107738	329.757	2197.92	-2.73677	7.46016e-14	3.52411e-12	VSIR
ENSG00000181350	13.2361	88.8348	-2.74339	3.18979e-06	3.54692e-05	LRRC75A
ENSG00000245812	20.3976	136.127	-2.74553	9.35683e-16	5.89796e-14	LINC02202
ENSG00000219693	1.09777	7.12115	-2.76625	0.000822305	0.00458621	FGF7P8
ENSG00000253958	3.1735	22.239	-2.77579	9.13648e-06	9.10502e-05	CLDN23
ENSG00000240065	22.5692	158.293	-2.79298	2.87289e-12	1.06369e-10	PSMB9
ENSG00000280339	6.54631	45.9025	-2.79712	7.57871e-12	2.59991e-10	AP001528.3
ENSG00000143416	74.6661	520.726	-2.79753	4.61949e-08	7.92856e-07	SELENBP1
ENSG00000124839	1.26481	8.7033	-2.80343	0.000412317	0.00254665	RAB17
ENSG00000205221	45.9633	323.232	-2.81282	5.39754e-05	0.00043292	VIT
ENSG00000168477	5596.54	39375.6	-2.81468	7.0717e-15	3.85454e-13	TNXB
ENSG00000139714	3.15336	22.0314	-2.81773	1.62181e-07	2.45953e-06	MORN3
ENSG00000001617	58.4406	412.507	-2.82075	1.32492e-08	2.52325e-07	SEMA3F
ENSG00000154263	20.0066	140.995	-2.82322	6.6067e-08	1.0908e-06	ABCA10
ENSG00000165507	60.1683	428.892	-2.82977	1.66961e-15	1.00318e-13	DEPP1
ENSG00000143554	81.2343	577.11	-2.8334	5.40265e-26	9.91242e-24	SLC27A3
ENSG00000254554	3.5379	25.3139	-2.84582	1.77451e-07	2.67335e-06	AC080023.1
ENSG00000073670	1.66623	11.9837	-2.84884	2.94174e-05	0.000254097	ADAM11
ENSG00000180113	2.25643	15.4147	-2.8502	2.06171e-05	0.000185572	TDRD6
ENSG00000115252	92.9831	675.202	-2.86456	6.98431e-18	5.75606e-16	PDE1A
ENSG00000128536	13.939	101.253	-2.865	2.85524e-27	5.86723e-25	CDHR3
ENSG00000279744	1.55054	11.8612	-2.87274	0.000207542	0.00140427	AC132938.5
ENSG00000103888	1605.66	11775.5	-2.87463	9.12508e-13	3.71309e-11	CEMIP
ENSG00000167646	3.0715	22.6196	-2.87578	0.000164653	0.00115555	DNAAF3
ENSG00000134769	21.1674	157.136	-2.88836	4.86142e-08	8.30402e-07	DTNA
ENSG00000012171	70.7879	526.987	-2.89745	2.59065e-09	5.7614e-08	SEMA3B
ENSG00000042062	10.5973	80.8114	-2.91535	2.0033e-06	2.34295e-05	RIPOR3
ENSG00000256508	1.76223	12.8165	-2.91699	0.000104654	0.00077441	MRGPRF-AS1
ENSG00000185432	104.536	789.215	-2.9182	4.12678e-13	1.75209e-11	METTL7A
ENSG00000145390	815.986	6190.53	-2.92405	2.74127e-86	2.81652e-82	USP53
ENSG00000167371	14.8631	113.548	-2.92575	2.89239e-14	1.42532e-12	PRRT2
ENSG00000261513	1.01432	7.87875	-2.93492	0.00136359	0.00709376	AC009097.4
ENSG00000168497	123.959	952.567	-2.94196	9.29072e-06	9.22295e-05	CAVIN2
ENSG00000164776	10.1705	78.9857	-2.94637	1.38769e-11	4.54788e-10	PHKG1
ENSG00000230943	1.66019	12.803	-2.94883	1.05875e-05	0.000103061	LINC02541
ENSG00000247317	4.50936	34.3475	-2.95186	1.96687e-06	2.30561e-05	LY6E-DT
ENSG00000099957	19.1122	147.675	-2.96408	1.24743e-09	2.91953e-08	P2RX6
ENSG00000223802	2.29108	17.8574	-2.96632	8.3426e-06	8.42005e-05	CERS1
ENSG00000181804	34.4548	271.166	-2.96828	1.6632e-19	1.63527e-17	SLC9A9
ENSG00000241956	3.94496	30.0766	-2.97736	6.41642e-08	1.06332e-06	AC109466.1
ENSG00000256897	1.0462	8.23633	-2.98152	0.00141223	0.00728858	AC018410.2
ENSG00000157601	14.5657	115.265	-2.98153	1.10449e-08	2.14317e-07	MX1
ENSG00000130592	148.657	1180.3	-2.98854	0.00122063	0.00646664	LSP1
ENSG00000277196	1.36361	10.321	-2.99227	0.0015414	0.00784211	AC007325.2
ENSG00000166823	1.07479	8.35716	-2.99881	0.00105776	0.00570647	MESP1
ENSG00000117643	74.0883	595.387	-3.00701	9.49003e-10	2.2655e-08	MAN1C1
ENSG00000213694	61.1011	492.919	-3.00824	2.78025e-30	7.61751e-28	S1PR3
ENSG00000170458	4.62396	37.186	-3.0176	5.96307e-11	1.77074e-09	CD14
ENSG00000119917	159.18	1298.94	-3.02894	8.63479e-32	2.77244e-29	IFIT3
ENSG00000134548	3.44188	27.6386	-3.03069	1.68334e-05	0.000156026	SPX
ENSG00000154930	29.7774	243.57	-3.03222	3.37143e-17	2.51926e-15	ACSS1
ENSG00000154262	189.173	1549.88	-3.03346	7.01764e-20	7.21027e-18	ABCA6
ENSG00000136040	20.447	168.088	-3.03399	2.34339e-07	3.42249e-06	PLXNC1
ENSG00000139304	9.155	73.9622	-3.03545	1.03797e-14	5.46905e-13	PTPRQ
ENSG00000126860	11.1201	92.5163	-3.04062	4.33081e-09	9.21262e-08	EVI2A
ENSG00000223930	1.02474	8.47265	-3.04152	0.000806811	0.00451625	AC109779.1
ENSG00000110900	23.1287	190.103	-3.04293	9.80758e-07	1.22514e-05	TSPAN11
ENSG00000163864	1.94828	15.785	-3.04533	0.000876263	0.00484693	NMNAT3
ENSG00000261625	6.75519	57.2269	-3.04759	8.23445e-14	3.85444e-12	AP003071.4
ENSG00000150636	3.3215	27.4976	-3.05129	5.38346e-10	1.37764e-08	CCDC102B
ENSG00000222005	1.32158	11.705	-3.05299	0.000107068	0.000789429	LINC01118
ENSG00000143028	39.2608	326.956	-3.05951	0.000123209	0.000892118	SYPL2
ENSG00000164520	0.943317	8.5891	-3.08347	0.000436622	0.00267107	RAET1E
ENSG00000162383	25.4674	215.578	-3.08636	5.19946e-15	2.90336e-13	SLC1A7
ENSG00000278962	7.90944	67.3917	-3.09542	3.88294e-23	5.4651e-21	AC092645.1
ENSG00000173083	7.45068	64.2848	-3.09584	5.35899e-09	1.11122e-07	HPSE
ENSG00000004799	1.81595	15.8171	-3.10024	0.000202122	0.00137122	PDK4
ENSG00000248290	29.2901	252.135	-3.10168	0.000843483	0.00469086	TNXA
ENSG00000258130	1.45	12.4221	-3.1031	0.00105305	0.00569003	AC106782.1
ENSG00000126950	8.17759	71.3257	-3.10483	9.00612e-05	0.000678397	TMEM35A
ENSG00000185565	34.8426	301.88	-3.11056	1.2545e-08	2.40709e-07	LSAMP
ENSG00000228536	2.07077	18.0506	-3.12113	0.000318118	0.00203455	AL513283.1
ENSG00000163666	1.05705	9.08178	-3.13287	0.000239981	0.00159128	HESX1
ENSG00000127083	17.2934	154.234	-3.15642	0.000551719	0.00326252	OMD
ENSG00000122035	2.55024	23.6073	-3.16456	7.05047e-07	9.12918e-06	RASL11A
ENSG00000107317	7.6252	68.6016	-3.16814	9.03934e-09	1.80339e-07	PTGDS
ENSG00000167306	1.83614	16.6578	-3.16829	5.09374e-06	5.39821e-05	MYO5B
ENSG00000135218	340.344	3071.51	-3.17299	2.73918e-12	1.02341e-10	CD36
ENSG00000242715	1.16642	11.1749	-3.1848	2.64141e-05	0.000231464	CCDC169
ENSG00000162641	0.871368	7.81804	-3.21689	0.000811945	0.00453757	AKNAD1
ENSG00000166793	7.48056	70.603	-3.22854	6.10588e-09	1.25344e-07	YPEL4
ENSG00000127863	41.3365	390.729	-3.23182	2.04632e-14	1.02811e-12	TNFRSF19
ENSG00000185745	157.339	1484.49	-3.23839	2.24328e-43	2.09533e-40	IFIT1
ENSG00000164056	38.364	363.537	-3.24254	1.19094e-25	2.05652e-23	SPRY1
ENSG00000068976	5.02907	48.1753	-3.24487	3.71097e-07	5.15945e-06	PYGM
ENSG00000172901	2.96164	28.2882	-3.27051	2.3548e-07	3.43426e-06	LVRN
ENSG00000271133	2.31576	22.2003	-3.28084	1.22444e-09	2.87882e-08	AC004130.1
ENSG00000104888	4.77728	47.5312	-3.31485	7.62825e-07	9.77872e-06	SLC17A7
ENSG00000156486	13.591	136.319	-3.31518	2.39628e-07	3.49229e-06	KCNS2
ENSG00000170962	160.527	1613.73	-3.3296	1.57542e-16	1.08635e-14	PDGFD
ENSG00000262691	7.28333	74.93	-3.34318	6.62123e-19	6.15654e-17	AC040160.1
ENSG00000179082	0.741596	8.20376	-3.34324	0.00026927	0.00176106	C9orf106
ENSG00000111913	52.4935	533.395	-3.34629	1.76553e-05	0.000162472	RIPOR2
ENSG00000145703	1.65172	16.8534	-3.34863	1.7511e-06	2.06919e-05	IQGAP2
ENSG00000171227	3.9218	41.2329	-3.3585	8.78655e-08	1.41723e-06	TMEM37
ENSG00000125378	31.3652	323.458	-3.36098	1.95133e-09	4.41606e-08	BMP4
ENSG00000085514	1.1333	10.8882	-3.36117	3.59313e-05	0.0003031	PILRA
ENSG00000054219	0.828699	8.54523	-3.36565	0.000186481	0.00128418	LY75
ENSG00000165140	1.7839	18.8723	-3.36889	8.50325e-05	0.000644059	FBP1
ENSG00000064787	1.26438	12.8719	-3.37102	2.08193e-05	0.00018731	BCAS1
ENSG00000103710	2.07655	21.7406	-3.38709	0.000430125	0.00263842	RASL12
ENSG00000163354	1.21477	12.9225	-3.39261	4.3237e-05	0.000356961	DCST2
ENSG00000151090	26.4357	277.659	-3.39555	2.23166e-05	0.000199222	THRB
ENSG00000158445	1.9631	20.0781	-3.39609	7.18266e-06	7.35042e-05	KCNB1
ENSG00000105852	0.714963	8.30161	-3.39797	0.00173726	0.00865011	PON3
ENSG00000164236	116	1229.75	-3.40469	4.98339e-20	5.19816e-18	ANKRD33B
ENSG00000104490	39.6636	421.986	-3.40581	1.85134e-23	2.64189e-21	NCALD
ENSG00000177363	292.501	3106.11	-3.40833	3.36915e-19	3.19045e-17	LRRN4CL
ENSG00000137752	9.78462	104.572	-3.40967	3.23792e-15	1.89023e-13	CASP1
ENSG00000123560	5.78572	62.3335	-3.42852	1.68078e-08	3.15131e-07	PLP1
ENSG00000148053	45.6291	493.266	-3.43431	0.00097187	0.00530534	NTRK2
ENSG00000170271	56.6558	613.554	-3.4391	4.32278e-29	1.05748e-26	FAXDC2
ENSG00000128918	2.58508	27.7192	-3.44713	8.47512e-06	8.53703e-05	ALDH1A2
ENSG00000237234	1.39914	14.347	-3.44765	0.000255427	0.00168445	Z99289.1
ENSG00000139132	16.1539	177.134	-3.45432	2.23637e-11	7.11381e-10	FGD4
ENSG00000091879	1.29102	13.8825	-3.46401	6.27131e-05	0.00049527	ANGPT2
ENSG00000184349	4.67882	51.0484	-3.46957	2.54906e-12	9.57599e-11	EFNA5
ENSG00000271930	0.653611	7.05438	-3.48163	0.00171936	0.00858596	AC016877.3
ENSG00000218052	1.41928	16.3042	-3.49431	2.24882e-06	2.59321e-05	ADAMTS7P4
ENSG00000276600	34.4803	389.767	-3.49658	3.29579e-59	7.52503e-56	RAB7B
ENSG00000189058	61.383	699.467	-3.50772	1.83662e-17	1.42107e-15	APOD
ENSG00000167992	24.026	274.578	-3.51243	1.55893e-14	7.96878e-13	VWCE
ENSG00000135472	52.7995	603.259	-3.51826	1.59556e-24	2.48083e-22	FAIM2
ENSG00000183801	79.0977	907.341	-3.51875	8.55925e-05	0.000647585	OLFML1
ENSG00000106123	9.18548	106.153	-3.52784	8.57781e-07	1.08471e-05	EPHB6
ENSG00000183486	16.5987	192.3	-3.53495	1.29089e-17	1.04435e-15	MX2
ENSG00000267127	1.05662	12.1206	-3.54758	8.60452e-06	8.64195e-05	AC090360.1
ENSG00000167780	0.585836	7.18612	-3.55631	0.00193173	0.00946249	SOAT2
ENSG00000136960	201.501	2374.13	-3.5564	1.97257e-46	2.2519e-43	ENPP2
ENSG00000169418	61.0867	722.671	-3.56506	2.14156e-06	2.48767e-05	NPR1
ENSG00000280237	0.63545	7.40169	-3.56592	0.00080176	0.00449484	MIR4697HG
ENSG00000282840	0.576935	7.27744	-3.56943	0.00035724	0.00224356	AC004554.2
ENSG00000169908	39.0352	464.506	-3.57126	1.87945e-05	0.00017104	TM4SF1
ENSG00000148541	2.59141	30.4431	-3.5754	4.15531e-05	0.000345139	FAM13C
ENSG00000074410	97.7646	1169.83	-3.57989	9.22954e-06	9.17107e-05	CA12
ENSG00000198719	1.26243	14.9814	-3.58391	2.10772e-05	0.000189382	DLL1
ENSG00000148926	460.534	5540.65	-3.58899	1.99349e-31	6.20669e-29	ADM
ENSG00000125414	16.5293	199.307	-3.59555	0.00173171	0.00863085	MYH2
ENSG00000178977	2.19794	27.3019	-3.6022	2.1817e-07	3.21374e-06	LINC00324
ENSG00000089127	3.80856	47.3192	-3.60636	7.26971e-05	0.000562869	OAS1
ENSG00000168398	69.2524	847.52	-3.60988	7.00285e-18	5.75606e-16	BDKRB2
ENSG00000105048	2.76595	33.2814	-3.61606	3.20051e-11	9.90472e-10	TNNT1
ENSG00000171388	2.16649	27.7566	-3.61991	3.04581e-10	8.0968e-09	APLN
ENSG00000111305	1.44804	18.0777	-3.64169	3.61253e-06	3.94651e-05	GSG1
ENSG00000241935	0.639102	7.87036	-3.64926	0.00164534	0.00829287	HOGA1
ENSG00000104213	31.2121	400.095	-3.67898	0.000179411	0.00124467	PDGFRL
ENSG00000013297	865.864	11174	-3.68993	3.71885e-11	1.13718e-09	CLDN11
ENSG00000261076	0.410748	5.51938	-3.69072	0.00150972	0.0077183	AC016396.2
ENSG00000214814	3.29379	43.5666	-3.69136	3.4435e-06	3.77853e-05	FER1L6
ENSG00000141469	2.95796	39.1108	-3.70702	0.000199499	0.00135808	SLC14A1
ENSG00000115461	4702.28	61611.5	-3.71178	7.92571e-05	0.000605898	IGFBP5
ENSG00000248388	0.435684	5.76361	-3.74965	0.00105659	0.00570312	AC093801.1
ENSG00000135437	5.9821	81.2006	-3.75914	1.48855e-20	1.67149e-18	RDH5
ENSG00000131386	25.8823	353.678	-3.76615	5.12048e-06	5.42095e-05	GALNT15
ENSG00000159713	3.87846	54.5603	-3.7793	6.66173e-08	1.09777e-06	TPPP3
ENSG00000235385	1.13979	16.7303	-3.78582	1.01325e-05	9.93855e-05	LINC02154
ENSG00000242337	0.421175	5.91455	-3.78878	0.000599011	0.00349889	TFP1
ENSG00000196932	0.764576	11.2827	-3.79478	8.40134e-05	0.00063728	TMEM26
ENSG00000214402	6.36351	88.5071	-3.79507	1.39878e-09	3.22961e-08	LCNL1
ENSG00000142583	6.67987	97.1393	-3.84307	4.28963e-09	9.14393e-08	SLC2A5
ENSG00000237940	1.06918	15.2978	-3.86864	8.46635e-06	8.53237e-05	LINC01238
ENSG00000186684	3.73416	52.7969	-3.87174	6.21257e-06	6.4541e-05	CYP27C1
ENSG00000171509	0.398194	6.3209	-3.89289	0.00185599	0.00915476	RXFP1
ENSG00000117425	16.1349	238.89	-3.89457	9.08686e-14	4.21503e-12	PTCH2
ENSG00000010319	1.22646	18.578	-3.9014	1.04303e-06	1.29194e-05	SEMA3G
ENSG00000134533	5.30276	78.8201	-3.9063	7.72663e-11	2.23941e-09	RERG
ENSG00000138449	44.6289	679.043	-3.92895	4.6932e-15	2.64946e-13	SLC40A1
ENSG00000105855	35.8982	550.54	-3.93461	2.25392e-27	4.72611e-25	ITGB8
ENSG00000047648	20.823	322.217	-3.93932	3.83881e-38	2.39041e-35	ARHGAP6
ENSG00000234537	0.421604	6.62019	-3.95021	0.00199985	0.00973123	AL354751.1
ENSG00000165197	3.93846	61.2431	-3.95694	8.45823e-09	1.69239e-07	VEGFD
ENSG00000283073	1.30705	19.6243	-3.95783	1.2307e-06	1.4982e-05	SMUG1-AS1
ENSG00000164920	83.5153	1299.6	-3.96	3.3519e-20	3.60619e-18	OSR2
ENSG00000019991	15.9429	252.428	-3.9651	1.49622e-14	7.66728e-13	HGF
ENSG00000217027	0.357481	6.78699	-3.99216	0.000423242	0.00260395	TPT1P4
ENSG00000133321	6.18251	100.221	-3.99343	2.53565e-16	1.70836e-14	RARRES3
ENSG00000179761	0.421175	6.80879	-3.99544	0.000176898	0.00123006	PIPOX
ENSG00000240687	0.228354	4.58805	-4.00082	0.00174931	0.00869386	AC082651.1
ENSG00000106809	10.1556	164.5	-4.00754	3.14898e-05	0.000269618	OGN
ENSG00000280200	0.729042	12.8904	-4.01973	0.000114457	0.000836707	AC073862.5
ENSG00000171408	12.5345	204.299	-4.02463	5.45184e-11	1.63309e-09	PDE7B
ENSG00000075213	18.0235	298.452	-4.03105	2.06839e-18	1.80099e-16	SEMA3A
ENSG00000185924	1.54839	24.4025	-4.03618	2.6416e-06	2.99736e-05	RTN4RL1
ENSG00000166924	1.69162	29.7203	-4.04232	3.24254e-08	5.77891e-07	NYAP1
ENSG00000163815	42.4036	699.715	-4.04433	8.23016e-06	8.31473e-05	CLEC3B
ENSG00000241318	0.228354	4.75043	-4.05209	0.000689533	0.00395457	WDR82P2
ENSG00000279581	0.357481	7.07284	-4.05514	0.000634347	0.00368226	AC073862.2
ENSG00000185742	31.0881	521.509	-4.07048	6.07972e-08	1.01324e-06	C11orf87
ENSG00000117600	7.3272	124.356	-4.07055	0.000116169	0.00084711	PLPPR4
ENSG00000133083	77.3611	1301.12	-4.07248	1.91862e-29	4.808e-27	DCLK1
ENSG00000144339	0.985556	17.301	-4.08755	9.02475e-06	9.00678e-05	TMEFF2
ENSG00000173894	0.178741	4.87012	-4.0932	0.000350132	0.00220973	CBX2
ENSG00000108381	16.3791	282.937	-4.10681	4.99738e-21	6.04066e-19	ASPA
ENSG00000285791	0.19282	4.93427	-4.10808	0.00171011	0.00854807	AC009879.3
ENSG00000248576	0.485727	7.38574	-4.11317	0.000388127	0.00241393	AC023794.1
ENSG00000106511	9.97851	173.82	-4.11589	6.59781e-07	8.61909e-06	MEOX2
ENSG00000184350	0.242863	5.02401	-4.12829	0.000761607	0.00430425	MRGPRE
ENSG00000166106	18.8376	330.96	-4.13443	2.22933e-16	1.5119e-14	ADAMTS15
ENSG00000181634	4.77589	84.9684	-4.15364	2.75496e-07	3.95333e-06	TNFSF15
ENSG00000267801	0.19282	5.12049	-4.17155	0.000747683	0.00423773	AC087289.5
ENSG00000165591	0.178741	5.18935	-4.18663	0.00100041	0.00543706	FAAH2
ENSG00000236444	0.433728	7.79001	-4.1887	0.000154944	0.00109527	UBE2L5
ENSG00000249464	0.564381	11.2273	-4.19517	5.79989e-05	0.000462124	LINC01091
ENSG00000224238	0.242863	5.27244	-4.2053	0.00149582	0.00766143	WARS2-IT1
ENSG00000272463	0.612469	11.4552	-4.20839	9.16983e-06	9.13382e-05	AL357054.4
ENSG00000075035	0	3.53112	-4.2085	0.00122642	0.00649029	WSCD2
ENSG00000197301	2.96901	54.2719	-4.21423	3.24354e-13	1.40319e-11	AC090673.1
ENSG00000139626	0.407095	7.99133	-4.22564	0.000191892	0.00131439	ITGB7
ENSG00000231445	2.74349	53.5367	-4.24567	2.40478e-10	6.45959e-09	TIMM8AP1
ENSG00000145526	1.262	24.2028	-4.27917	5.34872e-10	1.37098e-08	CDH18
ENSG00000261193	0.821496	16.2534	-4.29606	0.000886944	0.00489152	AC134312.4
ENSG00000146070	0.228354	5.66569	-4.30871	0.00197891	0.0096522	PLA2G7
ENSG00000147117	0	3.81561	-4.31124	0.000483452	0.00290992	ZNF157
ENSG00000238120	0.550302	12.2661	-4.32182	5.85179e-06	6.12263e-05	LINC01589
ENSG00000109819	0.729042	16.3824	-4.32564	1.49493e-07	2.28737e-06	PPARGC1A
ENSG00000170439	0.407095	8.61625	-4.33039	4.02665e-05	0.000335402	METTL7B
ENSG00000135914	1.24944	25.3604	-4.34672	1.30226e-09	3.0306e-08	HTR2B
ENSG00000259649	0	3.96378	-4.37046	0.000849724	0.00471664	AC027808.2
ENSG00000197291	1.71176	34.9088	-4.37691	1.02674e-08	2.00747e-07	RAMP2-AS1
ENSG00000183454	3.12709	65.7005	-4.39609	5.71202e-08	9.57393e-07	GRIN2A
ENSG00000100385	0.19282	6.08254	-4.40856	0.000107756	0.000792797	IL2RB
ENSG00000196155	100.741	2168.21	-4.42341	1.68302e-69	8.6461e-66	PLEKHG4
ENSG00000198125	0.398194	9.25613	-4.43903	1.7923e-05	0.00016442	MB
ENSG00000131969	0.178741	6.21284	-4.44234	0.000170382	0.00119128	ABHD12B
ENSG00000126861	2.04949	45.1341	-4.45104	1.22999e-07	1.91769e-06	OMG
ENSG00000244104	0.471218	9.35504	-4.45148	3.99839e-05	0.000333183	RN7SL659P
ENSG00000130595	10.8776	238.492	-4.45322	0.000135452	0.000970505	TNNT3
ENSG00000267339	0.485727	9.52716	-4.47842	3.46367e-05	0.000293142	LINC00906
ENSG00000169507	0.435684	9.68796	-4.50032	0.000123902	0.000896813	SLC38A11
ENSG00000028137	6.53402	149.905	-4.5087	5.01014e-28	1.10703e-25	TNFRSF1B
ENSG00000175785	0.843208	19.0352	-4.51366	0.000450916	0.00274389	PRIMA1
ENSG00000283787	5.4221	125.544	-4.52033	9.4618e-11	2.67075e-09	PRR33
ENSG00000163083	1.69942	40.9976	-4.52196	4.91134e-08	8.37536e-07	INHBB
ENSG00000127954	0.714963	17.9406	-4.53142	0.00019593	0.00133804	STEAP4
ENSG00000189108	0.714081	15.3119	-4.54365	0.000323404	0.00206579	IL1RAPL2
ENSG00000272321	0.808942	19.1763	-4.54405	8.86355e-05	0.000668393	AP003355.2
ENSG00000250041	0	4.48377	-4.55064	0.000630616	0.00366371	AC069360.1
ENSG00000185862	3.2712	77.9805	-4.56395	1.64596e-14	8.39276e-13	EVI2B
ENSG00000137672	2.68367	64.4737	-4.58595	1.43619e-09	3.30483e-08	TRPC6
ENSG00000222035	0.228354	6.87266	-4.59112	0.000177538	0.00123335	AC079354.1
ENSG00000258986	0.242863	6.89482	-4.59683	0.00162012	0.00819033	TMEM179
ENSG00000225106	0.371561	10.5238	-4.62336	0.000291929	0.00188761	AL162457.2
ENSG00000154856	1.18203	29.9377	-4.62761	4.43872e-05	0.000364699	APCDD1
ENSG00000013293	15.7025	399.867	-4.66551	5.12232e-18	4.33163e-16	SLC7A14
ENSG00000153993	48.8273	1267.91	-4.69769	5.06009e-25	8.327e-23	SEMA3D
ENSG00000248441	0.242863	7.49499	-4.71017	0.000738425	0.00419169	LINC01197
ENSG00000070193	0.19282	7.57186	-4.72677	0.000224212	0.00150468	FGF10
ENSG00000188488	0.242863	7.58291	-4.72888	0.000759351	0.00429741	SERPINA5
ENSG00000243323	0	5.09509	-4.73278	0.000585549	0.00343294	PTPRVP
ENSG00000254139	0	5.11858	-4.73299	0.00148617	0.00761958	AC104051.2
ENSG00000235505	0.205374	7.63371	-4.74197	7.78395e-05	0.000595948	CASP17P
ENSG00000248869	5.48105	149.487	-4.75717	5.09038e-20	5.25639e-18	LINC02511
ENSG00000009950	0.19282	7.75919	-4.76219	0.000482206	0.00290497	MLXIPL
ENSG00000023445	1.2503	34.8071	-4.80626	2.25101e-12	8.48735e-11	BIRC3
ENSG00000203837	0	5.41115	-4.81499	0.000439154	0.00268417	PNLIPRP3
ENSG00000185585	44.1691	1276.47	-4.8483	1.71316e-29	4.40048e-27	OLFML2A
ENSG00000262898	0	5.56116	-4.85521	0.000134448	0.000964318	AC139099.2
ENSG00000263812	0.178741	8.42816	-4.88363	1.46351e-05	0.0001377	LINC00908
ENSG00000260166	0.19282	8.56504	-4.90386	0.000257273	0.00169391	AC134312.3
ENSG00000187268	0	5.72405	-4.90586	9.49253e-05	0.000710609	FAM9C
ENSG00000277496	0	5.82958	-4.92762	0.000448436	0.00273196	AL357033.4
ENSG00000183134	0	6.04334	-4.97896	0.000640698	0.00371178	PTGDR2
ENSG00000172399	1.07674	33.0667	-4.98765	6.72862e-10	1.68886e-08	MYOZ2
ENSG00000124440	0	6.10544	-4.99134	9.62399e-05	0.000718725	HIF3A
ENSG00000133317	0	6.10837	-4.99951	3.1533e-05	0.000269876	LGALS12
ENSG00000235563	0.242863	9.20751	-5.00997	9.3475e-05	0.000700978	AL445183.2
ENSG00000178235	0.19282	9.17671	-5.01001	0.000200949	0.00136552	SLITRK1
ENSG00000159387	0	6.18933	-5.01745	0.00115329	0.00614762	IRX6
ENSG00000118898	204.213	6630.25	-5.02176	1.19826e-13	5.48398e-12	PPL
ENSG00000136999	59.0561	1926.91	-5.03057	6.34812e-31	1.83729e-28	NOV
ENSG00000197632	9.8685	327.065	-5.03726	1.01959e-10	2.87009e-09	SERPINB2
ENSG00000174059	20.3552	677.572	-5.05348	9.70088e-08	1.5465e-06	CD34
ENSG00000016391	1.85628	67.3029	-5.08223	4.24253e-13	1.79014e-11	CHDH
ENSG00000153002	0.471218	14.4986	-5.08768	6.04032e-06	6.31025e-05	CPB1
ENSG00000234810	0.178741	9.78894	-5.09407	1.0012e-05	9.84387e-05	AL603840.1
ENSG00000089041	1.38571	50.2717	-5.13669	6.12085e-11	1.81235e-09	P2RX7
ENSG00000260470	0.228354	10.1758	-5.15395	7.4619e-07	9.5754e-06	AC023794.5
ENSG00000155849	0	6.82854	-5.15847	0.000191336	0.0013119	ELMO1
ENSG00000168676	0.228354	10.5171	-5.19723	1.35475e-06	1.63661e-05	KCTD19
ENSG00000230018	0	7.14462	-5.22098	0.000553052	0.00326853	PPIAP39
ENSG00000130032	0.178741	11.4462	-5.32248	0.000110628	0.000811893	PRRG3
ENSG00000140538	2.31339	92.6604	-5.32916	0.000450895	0.00274389	NTRK3
ENSG00000169313	0	8.35756	-5.44608	0.000165596	0.00116059	P2RY12
ENSG00000267361	0.19282	12.6524	-5.46364	2.97227e-07	4.2418e-06	SEC24AP1
ENSG00000166473	3.15336	138.39	-5.47214	3.75152e-28	8.37935e-26	PKD1L2
ENSG00000100505	0	8.52543	-5.4744	2.28408e-06	2.63092e-05	TRIM9
ENSG00000152580	4.29036	192.159	-5.47985	1.87197e-16	1.27375e-14	IGSF10
ENSG00000146966	3.40009	154.438	-5.49011	7.31659e-10	1.82008e-08	DENND2A
ENSG00000226622	0	8.81019	-5.52347	8.08299e-05	0.00061586	AC092155.1
ENSG00000137265	0.614424	28.614	-5.53243	1.2551e-05	0.000120238	IRF4
ENSG00000187492	0.19282	13.4924	-5.55801	5.48866e-08	9.25997e-07	CDHR4
ENSG00000173406	12.276	590.314	-5.58821	1.66557e-08	3.13423e-07	DAB1
ENSG00000229474	0	9.33099	-5.60452	1.65146e-05	0.000153486	PATL2
ENSG00000126878	6.41885	315.7	-5.61543	6.81423e-06	7.02588e-05	AIF1L
ENSG00000158270	14.1882	703.392	-5.62328	6.87138e-16	4.44025e-14	COLEC12
ENSG00000250722	2.81473	142.318	-5.67022	7.69336e-05	0.000589672	SELENOP
ENSG00000274286	0.896475	47.0776	-5.75317	0.000195336	0.00133443	ADRA2B
ENSG00000073282	0	11.4686	-5.90133	1.02928e-06	1.27799e-05	TP63
ENSG00000186377	0	12.8254	-6.06804	1.0783e-05	0.000104618	CYP4X1
ENSG00000242611	0.178741	19.2805	-6.07711	1.26415e-05	0.000121049	AC093627.6
ENSG00000285336	0	13.6068	-6.14801	4.41062e-07	6.02535e-06	AC108734.4
ENSG00000103184	1.49987	106.726	-6.18389	2.51166e-14	1.24367e-12	SEC14L5
ENSG00000155511	0	14.0135	-6.1972	1.11166e-08	2.151e-07	GRIA1
ENSG00000163145	0	16.5341	-6.42888	5.39829e-08	9.12999e-07	C1QTNF7
ENSG00000265485	0	16.8882	-6.46061	2.83264e-06	3.18773e-05	LINC01915
ENSG00000205037	0.796389	71.9579	-6.46653	6.15928e-07	8.08401e-06	AC134312.1
ENSG00000141574	5.31018	545.54	-6.70395	1.70693e-51	2.69814e-48	SECTM1
ENSG00000248698	1.10015	116.774	-6.79568	2.08402e-15	1.23771e-13	LINC01085
ENSG00000111728	2.04712	229.519	-6.8005	3.38361e-22	4.51492e-20	ST8SIA1
ENSG00000167612	0.178741	32.2999	-6.81833	2.73377e-09	6.03398e-08	ANKRD33
ENSG00000168309	0	21.6738	-6.82164	1.03245e-10	2.89834e-09	FAM107A
ENSG00000227544	0.421175	49.907	-6.87049	9.22379e-09	1.83485e-07	AC018647.1
ENSG00000168079	11.2165	1389.6	-6.94522	6.91701e-18	5.73136e-16	SCARA5
ENSG00000157404	2.42432	289.013	-6.95643	1.7737e-29	4.49973e-27	KIT
ENSG00000157368	0	32.8512	-7.42044	1.07899e-11	3.58772e-10	IL34
ENSG00000124749	0.921863	221.123	-7.8045	1.2888e-14	6.65414e-13	COL21A1
ENSG00000196616	4.51892	2480.4	-9.08763	2.95071e-17	2.2292e-15	ADH1B

## Sheet: HYPOXIA
gene_id	Hypoxia	Control	log2FoldChange	pvalue	padj	gene_name
ENSG00000232788	16.0698	0.599103	4.72608	2.77694e-06	0.00103337	ITGA6-AS1
ENSG00000174697	69.0321	3.41793	4.33296	1.94134e-07	9.90751e-05	LEP
ENSG00000225205	41.7337	2.26753	4.22235	4.58904e-16	9.10771e-13	AC078883.1
ENSG00000247095	300.468	21.5289	3.79756	2.3276e-46	2.07878e-42	MIR210HG
ENSG00000171388	245.969	29.8406	3.04818	1.2454e-24	4.44907e-21	APLN
ENSG00000088340	212.5	43.9937	2.27454	1.64384e-08	1.04865e-05	FER1L4
ENSG00000143847	363.431	92.9501	1.96839	4.29235e-05	0.00995713	PPFIA4
ENSG00000185633	1774.22	456.277	1.95874	5.46095e-14	6.5029e-11	NDUFA4L2
ENSG00000160201	160.344	41.53	1.94883	1.15855e-07	6.67549e-05	U2AF1
ENSG00000061656	149.097	40.0545	1.89962	4.76301e-14	6.07692e-11	SPAG4
ENSG00000109107	1110.27	297.976	1.89759	2.16753e-16	4.83956e-13	ALDOC
ENSG00000091428	38.1039	10.5794	1.84772	1.01705e-05	0.00297813	RAPGEF4
ENSG00000152256	500.702	141.055	1.82886	5.6716e-16	1.01306e-12	PDK1
ENSG00000205129	44.3259	12.9995	1.77179	2.69804e-07	0.000126822	C4orf47
ENSG00000176171	2887.45	918.779	1.65189	2.29224e-27	1.3648e-23	BNIP3
ENSG00000134333	21873.2	7011.59	1.64136	1.17543e-57	2.09954e-53	LDHA
ENSG00000171992	546.951	180.314	1.60073	4.1448e-06	0.00148069	SYNPO
ENSG00000117394	1575.96	526.853	1.58069	1.02674e-09	7.6415e-07	SLC2A1
ENSG00000170525	1291.08	436.747	1.56382	1.31583e-07	7.34477e-05	PFKFB3
ENSG00000102144	9505.74	3269.79	1.53953	4.24735e-25	1.89665e-21	PGK1
ENSG00000186352	348.17	121.372	1.51916	2.52959e-06	0.000961352	ANKRD37
ENSG00000219607	466.152	165.79	1.49173	3.58883e-10	3.20518e-07	PPP1R3G
ENSG00000170379	51.9751	18.5801	1.4835	4.97625e-06	0.00170934	TCAF2
ENSG00000226415	122.413	44.0939	1.47111	5.8594e-15	9.51461e-12	TPI1P1
ENSG00000111674	1274.66	466.208	1.4517	2.53183e-11	2.38019e-08	ENO2
ENSG00000141526	3055.73	1120.55	1.4473	2.09372e-07	0.000103883	SLC16A3
ENSG00000196787	49.3498	18.821	1.40419	3.30778e-06	0.00120579	HIST1H2AG
ENSG00000111669	9685.97	3740.23	1.37268	1.31871e-22	3.36496e-19	TPI1
ENSG00000213700	36.423	14.2732	1.34503	8.87239e-06	0.00273239	RPL17P50
ENSG00000167772	304.126	120.176	1.34061	6.76917e-07	0.000287883	ANGPTL4
ENSG00000104415	1419.29	569.469	1.31804	2.25893e-07	0.000109051	WISP1
ENSG00000214193	219.676	89.7387	1.29162	5.12663e-12	5.38658e-09	SH3D21
ENSG00000162433	2490.83	1020.95	1.28669	3.26188e-09	2.24091e-06	AK4
ENSG00000186918	783.614	352.507	1.15228	1.44123e-06	0.000572071	ZNF395
ENSG00000152952	4244.87	1923.8	1.14185	7.16748e-06	0.00232774	PLOD2
ENSG00000112715	3915.27	1809.16	1.11382	3.64749e-05	0.00880426	VEGFA
ENSG00000122884	4938.75	2322.34	1.08853	2.60171e-14	3.57475e-11	P4HA1
ENSG00000185499	333.538	157.523	1.08268	6.76331e-07	0.000287883	MUC1
ENSG00000135766	2460.23	1183.99	1.05506	5.49837e-10	4.46418e-07	EGLN1
ENSG00000133874	84.8085	40.9461	1.04847	1.8113e-05	0.00490203	RNF122
ENSG00000104812	1225.65	594.385	1.04337	2.19489e-23	6.53418e-20	GYS1
ENSG00000131389	3405.96	1653.52	1.04267	2.98859e-05	0.00751862	SLC6A6
ENSG00000168003	1728.42	3497.97	-1.01729	8.87951e-08	5.46917e-05	SLC3A2
ENSG00000140961	198.352	513.062	-1.37218	9.80656e-09	6.48758e-06	OSGIN1
ENSG00000171658	136.248	386.699	-1.50672	1.0432e-05	0.00300543	NMRAL2P
ENSG00000187243	4.49621	59.103	-3.70397	1.86418e-07	9.79353e-05	MAGED4B
