# Supplementary figures and images for: Exploring Anti-Fibrotic Effects of Adipose-Derived Stem Cells: Transcriptome Analysis upon Fibrotic, Inflammatory, and Hypoxic Conditioning
Source: MDPI journal article supplement (doi:10.3390/cells13080693), 2024-04-17

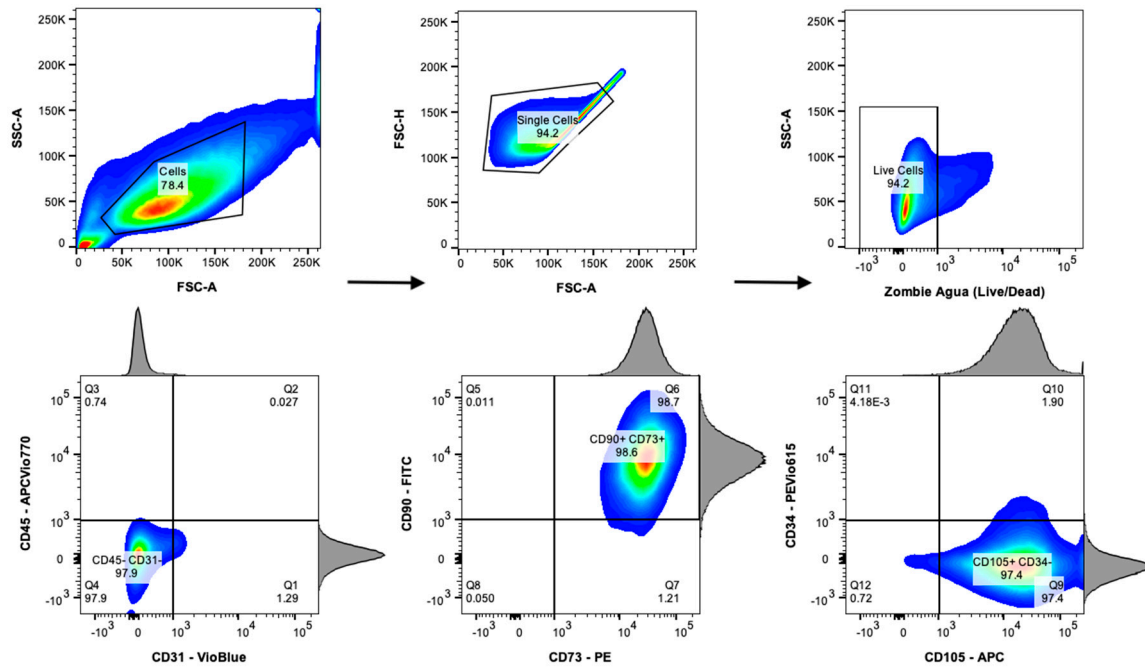

**Figure S1.** Flow cytometric analysis of human adipose-derived stem cells (ADSCs).

Supplement: s1 [file s1]
